# Supplementary material for: Analysis of Behavioural Thermoregulatory Responses in Giraffa, Regarding Temperature and Sunlight Exposure during Daylight Hours
Source: Preprints.org preprint supplement (doi:10.20944/preprints202403.1683.v1), 2024-03-27
Supplement: Supplementary file 1 [file supplementary]

## Sheet: Rowan
Focal Time	Behaviour Dur (Sec)	Focal Dur (Sec)	Sex	Age	Name	Start Temp (C)	End Temp (C)	Max Temp (C)	Area	Wind	Weather	Position	Exposure	Behaviour	Food	Date	Session	Season
N/A	21	900	F	Adult	Madame Butterfly	30.9	34.9	35.2	Open	None	Sunny	Directly Away From The Sun	Fully Exposed	Moving	N/A	11/15/2021	12:00 - 14:00	Wet
N/A	29	900	F	Adult	Madame Butterfly	30.9	34.9	35.2	Open	Low	Sunny	Directly Away From The Sun	Fully Exposed	Foraging	N/A	11/15/2021	12:00 - 14:00	Wet
N/A	97	900	F	Adult	Madame Butterfly	30.9	34.9	35.2	Open	None	Sunny	Directly Away From The Sun	Partially Exposed	Foraging	N/A	11/15/2021	12:00 - 14:00	Wet
N/A	318	900	F	Adult	Madame Butterfly	30.9	34.9	35.2	Open	None	Sunny	Directly Away From The Sun	Partially Exposed	Moving	N/A	11/15/2021	12:00 - 14:00	Wet
N/A	435	900	F	Adult	Madame Butterfly	30.9	34.9	35.2	Open	None	Sunny	Directly Away From The Sun	Partially Exposed	Foraging	N/A	11/15/2021	12:00 - 14:00	Wet
N/A	15	900	M	Adult	Kevin	30.9	34.9	35.2	Open	Low	Sunny	Towards The Sun	Partially Exposed	Foraging	N/A	11/15/2021	12:00 - 14:00	Wet
N/A	45	900	M	Adult	Kevin	30.9	34.9	35.2	Open	Low	Sunny	Towards The Sun	Partially Exposed	Foraging	N/A	11/15/2021	12:00 - 14:00	Wet
N/A	82	900	M	Adult	Kevin	30.9	34.9	35.2	Open	Low	Sunny	Directly Away From The Sun	Partially Exposed	Foraging	N/A	11/15/2021	12:00 - 14:00	Wet
N/A	371	900	M	Adult	Kevin	30.9	34.9	35.2	Open	Medium	Sunny	Directly Away From The Sun	Fully Exposed	Moving	N/A	11/15/2021	12:00 - 14:00	Wet
N/A	387	900	M	Adult	Kevin	30.9	34.9	35.2	Open	Medium	Sunny	Towards The Sun	Fully Exposed	Drinking	N/A	11/15/2021	12:00 - 14:00	Wet
N/A	12	900	M	Adult	McFly	35	31.2	35.2	Open	Low	Sunny	Directly Away From The Sun	Fully Exposed	Vigilant	N/A	11/15/2021	16:00 - Sunset	Wet
N/A	58	900	M	Adult	McFly	35	31.2	35.2	Open	Low	Sunny	Directly Away From The Sun	Fully Exposed	Moving	N/A	11/15/2021	16:00 - Sunset	Wet
N/A	110	900	M	Adult	McFly	35	31.2	35.2	Closed	None	Sunny	Directly Away From The Sun	Partially Exposed	Foraging	N/A	11/15/2021	16:00 - Sunset	Wet
N/A	720	900	M	Adult	McFly	35	31.2	35.2	Closed	None	Sunny	Towards The Sun	No Exposure	Foraging	N/A	11/15/2021	16:00 - Sunset	Wet
N/A	13	900	M	Adult	McFly	28.8	32.7	39.7	Road	None	Sunny	Directly Away From The Sun	Partially Exposed	Interacting	N/A	11/16/2021	Sunrise - 10:00	Wet
N/A	37	900	M	Adult	McFly	28.8	32.7	39.7	Road	None	Sunny	Directly Away From The Sun	Partially Exposed	Vigilant	N/A	11/16/2021	Sunrise - 10:00	Wet
N/A	863	900	M	Adult	McFly	28.8	32.7	39.7	Road	None	Sunny	Directly Away From The Sun	Partially Exposed	Interacting	N/A	11/16/2021	Sunrise - 10:00	Wet
N/A	40	900	M	Adult	Dark Male	28.8	32.7	39.7	Closed	None	Sunny	Towards The Sun	No Exposure	Foraging	N/A	11/16/2021	Sunrise - 10:00	Wet
N/A	35	900	M	Adult	Dark Male	28.8	32.7	39.7	Closed	None	Sunny	Directly Away From The Sun	No Exposure	Moving	N/A	11/16/2021	Sunrise - 10:00	Wet
N/A	517	900	M	Adult	Dark Male	28.8	32.7	39.7	Closed	None	Sunny	Directly Away From The Sun	No Exposure	Foraging	N/A	11/16/2021	Sunrise - 10:00	Wet
N/A	92	900	M	Adult	Dark Male	28.8	32.7	39.7	Road	None	Sunny	Directly Away From The Sun	Fully Exposed	Moving	N/A	11/16/2021	Sunrise - 10:00	Wet
N/A	217	900	M	Adult	Dark Male	28.8	32.7	39.7	Road	Low	Sunny	Towards The Sun	No Exposure	Foraging	N/A	11/16/2021	Sunrise - 10:00	Wet
N/A	43	900	F	Juvenile	N/A	38.7	39.3	39.7	Closed	None	Sunny	Directly Away From The Sun	Fully Exposed	Foraging	N/A	11/16/2021	12:00 - 14:00	Wet
N/A	11	900	F	Juvenile	N/A	38.7	39.3	39.7	Closed	Low	Sunny	Directly Away From The Sun	Partially Exposed	Moving	N/A	11/16/2021	12:00 - 14:00	Wet
N/A	33	900	F	Juvenile	N/A	38.7	39.3	39.7	Closed	Medium	Sunny	Directly Away From The Sun	Partially Exposed	Foraging	N/A	11/16/2021	12:00 - 14:00	Wet
N/A	134	900	F	Juvenile	N/A	38.7	39.3	39.7	Closed	None	Sunny	Directly Away From The Sun	Fully Exposed	Moving	N/A	11/16/2021	12:00 - 14:00	Wet
N/A	379	900	F	Juvenile	N/A	38.7	39.3	39.7	Closed	None	Sunny	Directly Away From The Sun	Fully Exposed	Foraging	N/A	11/16/2021	12:00 - 14:00	Wet
N/A	74	900	F	Juvenile	N/A	38.7	39.3	39.7	Closed	None	Sunny	Directly Away From The Sun	Partially Exposed	Moving	N/A	11/16/2021	12:00 - 14:00	Wet
N/A	226	900	F	Juvenile	N/A	38.7	39.3	39.7	Closed	Low	Sunny	Directly Away From The Sun	Partially Exposed	Foraging	N/A	11/16/2021	12:00 - 14:00	Wet
N/A	620	900	M	Adult	Kevin	38.7	39.3	39.7	Closed	Low	Cloudy	Directly Away From The Sun	Cloudy Day	Foraging	N/A	11/16/2021	12:00 - 14:00	Wet
N/A	20	900	M	Adult	Kevin	38.7	39.3	39.7	Closed	None	Sunny	Towards The Sun	Partially Exposed	Moving	N/A	11/16/2021	12:00 - 14:00	Wet
N/A	100	900	M	Adult	Kevin	38.7	39.3	39.7	Closed	None	Sunny	Towards The Sun	No Exposure	Foraging	N/A	11/16/2021	12:00 - 14:00	Wet
N/A	160	900	M	Adult	Kevin	38.7	39.3	39.7	Road	None	Sunny	Directly Away From The Sun	No Exposure	Vigilant	N/A	11/16/2021	12:00 - 14:00	Wet
N/A	56	900	M	Juvenile	Napoleon	38.7	39.3	39.7	Closed	Medium	Sunny	Directly Away From The Sun	Partially Exposed	Foraging	N/A	11/16/2021	12:00 - 14:00	Wet
N/A	30	900	M	Juvenile	Napoleon	38.7	39.3	39.7	Closed	Low	Sunny	Directly Away From The Sun	No Exposure	Moving	N/A	11/16/2021	12:00 - 14:00	Wet
N/A	67	900	M	Juvenile	Napoleon	38.7	39.3	39.7	Closed	Low	Sunny	Directly Away From The Sun	No Exposure	Foraging	N/A	11/16/2021	12:00 - 14:00	Wet
N/A	43	900	M	Juvenile	Napoleon	38.7	39.3	39.7	Closed	Low	Sunny	Directly Away From The Sun	Fully Exposed	Moving	N/A	11/16/2021	12:00 - 14:00	Wet
N/A	57	900	M	Juvenile	Napoleon	38.7	39.3	39.7	Closed	Medium	Sunny	Directly Away From The Sun	Partially Exposed	Vigilant	N/A	11/16/2021	12:00 - 14:00	Wet
N/A	55	900	M	Juvenile	Napoleon	38.7	39.3	39.7	Closed	Low	Sunny	Directly Away From The Sun	Partially Exposed	Moving	N/A	11/16/2021	12:00 - 14:00	Wet
N/A	348	900	M	Juvenile	Napoleon	38.7	39.3	39.3	Closed	Low	Sunny	Directly Away From The Sun	Partially Exposed	Foraging	N/A	11/16/2021	12:00 - 14:00	Wet
N/A	244	900	M	Juvenile	Napoleon	38.7	39.3	39.7	Road	None	Sunny	Directly Away From The Sun	Fully Exposed	Moving	N/A	11/16/2021	12:00 - 14:00	Wet
N/A	740	900	F	Adult	N/A	38.7	39.3	39.7	Closed	None	Sunny	Directly Away From The Sun	Partially Exposed	Foraging	N/A	11/16/2021	12:00 - 14:00	Wet
N/A	160	900	F	Adult	N/A	38.7	39.3	39.7	Closed	None	Sunny	Directly Away From The Sun	Partially Exposed	Moving	N/A	11/16/2021	12:00 - 14:00	Wet
N/A	13	900	F	Adult	Madame Butterfly	34.5	30.8	35.1	Closed	None	Cloudy	Towards The Sun	Cloudy Day	Vigilant	N/A	11/17/2021	16:00 - Sunset	Wet
N/A	27	900	F	Adult	Madame Butterfly	34.5	30.8	35.1	Closed	None	Cloudy	Towards The Sun	Cloudy Day	Moving	N/A	11/17/2021	16:00 - Sunset	Wet
N/A	32	900	F	Adult	Madame Butterfly	34.5	30.8	35.1	Closed	None	Cloudy	Towards The Sun	Cloudy Day	Foraging	N/A	11/17/2021	16:00 - Sunset	Wet
N/A	122	900	F	Adult	Madame Butterfly	34.5	30.8	35.1	Closed	None	Cloudy	Towards The Sun	Cloudy Day	Moving	N/A	11/17/2021	16:00 - Sunset	Wet
N/A	59	900	F	Adult	Madame Butterfly	34.5	30.8	35.1	Closed	None	Cloudy	Towards The Sun	Cloudy Day	Foraging	N/A	11/17/2021	16:00 - Sunset	Wet
N/A	211	900	F	Adult	Madame Butterfly	34.5	30.8	35.1	Closed	None	Cloudy	Directly Away From The Sun	Cloudy Day	Moving	N/A	11/17/2021	16:00 - Sunset	Wet
N/A	334	900	F	Adult	Madame Butterfly	34.5	30.8	35.1	Closed	None	Cloudy	Directly Away From The Sun	Cloudy Day	Foraging	N/A	11/17/2021	16:00 - Sunset	Wet
N/A	900	900	F	Adult	Kagiso	29.1	34.1	37.2	Open	Low	Sunny	Directly Away From The Sun	Partially Exposed	Foraging	N/A	11/18/2021	12:00 - 14:00	Wet
N/A	900	900	F	Adult	Flower	29.1	34.1	37.2	Open	Low	Sunny	Directly Away From The Sun	Partially Exposed	Foraging	N/A	11/18/2021	12:00 - 14:00	Wet
N/A	156	900	F	Adult	Madame Butterfly	28.5	32.8	33.1	Closed	Low	Cloudy	Towards The Sun	Cloudy Day	Foraging	N/A	11/19/2021	Sunrise - 10:00	Wet
N/A	10	900	F	Adult	Madame Butterfly	28.5	32.8	33.1	Closed	Low	Cloudy	Directly Away From The Sun	Cloudy Day	Moving	N/A	11/19/2021	Sunrise - 10:00	Wet
N/A	435	900	F	Adult	Madame Butterfly	28.5	32.8	33.1	Closed	Low	Cloudy	Directly Away From The Sun	Cloudy Day	Foraging	N/A	11/19/2021	Sunrise - 10:00	Wet
N/A	49	900	F	Adult	Madame Butterfly	28.5	32.8	33.1	Closed	Low	Cloudy	Directly Away From The Sun	Cloudy Day	Moving	N/A	11/19/2021	Sunrise - 10:00	Wet
N/A	28	900	F	Adult	Madame Butterfly	28.5	32.8	33.1	Closed	Low	Cloudy	Directly Away From The Sun	Cloudy Day	Foraging	N/A	11/19/2021	Sunrise - 10:00	Wet
N/A	7	900	F	Adult	Madame Butterfly	28.5	32.8	33.1	Closed	Low	Cloudy	Directly Away From The Sun	Cloudy Day	Moving	N/A	11/19/2021	Sunrise - 10:00	Wet
N/A	215	900	F	Adult	Madame Butterfly	28.5	32.8	33.1	Open	Low	Cloudy	Directly Away From The Sun	Cloudy Day	Foraging	N/A	11/19/2021	Sunrise - 10:00	Wet
N/A	573	900	F	Adult	Nala	24.5	27.4	31.3	Open	Low	Cloudy	Towards The Sun	Cloudy Day	Foraging	N/A	11/22/2021	Sunrise - 10:00	Wet
N/A	169	900	F	Adult	Nala	24.5	27.4	31.3	Open	Low	Cloudy	Directly Away From The Sun	Cloudy Day	Foraging	N/A	11/22/2021	Sunrise - 10:00	Wet
N/A	158	900	F	Adult	Nala	24.5	27.4	31.3	Open	Low	Cloudy	Towards The Sun	Cloudy Day	Foraging	N/A	11/22/2021	Sunrise - 10:00	Wet
N/A	44	900	M	Adult	Dark Male	24.5	28.8	30.8	Closed	Low	Cloudy	Directly Away From The Sun	Cloudy Day	Foraging	N/A	2021-11-24	Sunrise - 10:00	Wet
N/A	16	900	M	Adult	Dark Male	24.5	28.8	30.8	Closed	Low	Cloudy	Directly Away From The Sun	Cloudy Day	Moving	N/A	2021-11-24	Sunrise - 10:00	Wet
N/A	8	900	M	Adult	Dark Male	24.5	28.8	30.8	Closed	None	Cloudy	Towards The Sun	Cloudy Day	Foraging	N/A	2021-11-24	Sunrise - 10:00	Wet
N/A	17	900	M	Adult	Dark Male	24.5	28.8	30.8	Closed	None	Cloudy	Towards The Sun	Cloudy Day	Moving	N/A	2021-11-24	Sunrise - 10:00	Wet
N/A	127	900	M	Adult	Dark Male	24.5	28.8	30.8	Closed	None	Cloudy	Towards The Sun	Cloudy Day	Foraging	N/A	2021-11-24	Sunrise - 10:00	Wet
N/A	76	900	M	Adult	Dark Male	24.5	28.8	30.8	Closed	None	Cloudy	Towards The Sun	Cloudy Day	Moving	N/A	2021-11-24	Sunrise - 10:00	Wet
N/A	66	900	M	Adult	Dark Male	24.5	28.8	30.8	Closed	None	Cloudy	Directly Away From The Sun	Cloudy Day	Foraging	N/A	2021-11-24	Sunrise - 10:00	Wet
N/A	199	900	M	Adult	Dark Male	24.5	28.8	30.8	Closed	Medium	Cloudy	Towards The Sun	Cloudy Day	Moving	N/A	2021-11-24	Sunrise - 10:00	Wet
N/A	347	900	M	Adult	Dark Male	24.5	28.8	30.8	Closed	Low	Cloudy	Directly Away From The Sun	Cloudy Day	Foraging	N/A	2021-11-24	Sunrise - 10:00	Wet
N/A	900	900	M	Adult	Charlie	24.5	28.8	30.8	Road	Low	Cloudy	Directly Away From The Sun	Cloudy Day	Vigilant	N/A	2021-11-24	Sunrise - 10:00	Wet
N/A	900	900	F	Adult	Sahara	24.5	28.8	30.8	Road	Low	Cloudy	Directly Away From The Sun	Cloudy Day	Vigilant	N/A	11/24/2021	Sunrise - 10:00	Wet
N/A	49	900	F	Adult	Nala	24.9	27.4	27.9	Closed	Medium	Cloudy	Directly Away From The Sun	Cloudy Day	Moving	N/A	11/25/2021	12:00 - 14:00	Wet
N/A	40	900	F	Adult	Nala	24.9	27.4	27.9	Closed	Medium	Cloudy	Towards The Sun	Cloudy Day	Foraging	N/A	11/25/2021	12:00 - 14:00	Wet
N/A	31	900	F	Adult	Nala	24.9	27.4	27.9	Closed	Medium	Cloudy	Directly Away From The Sun	Cloudy Day	Vigilant	N/A	11/25/2021	12:00 - 14:00	Wet
N/A	17	900	F	Adult	Nala	24.9	27.4	27.9	Closed	Medium	Cloudy	Directly Away From The Sun	Cloudy Day	Moving	N/A	11/25/2021	12:00 - 14:00	Wet
N/A	120	900	F	Adult	Nala	24.9	27.4	27.9	Closed	Medium	Cloudy	Directly Away From The Sun	Cloudy Day	Vigilant	N/A	11/25/2021	12:00 - 14:00	Wet
N/A	28	900	F	Adult	Nala	24.9	27.4	27.9	Closed	Medium	Cloudy	Directly Away From The Sun	Cloudy Day	Moving	N/A	11/25/2021	12:00 - 14:00	Wet
N/A	615	900	F	Adult	Nala	24.9	27.4	27.9	Closed	Medium	Cloudy	Directly Away From The Sun	Cloudy Day	Foraging	N/A	11/25/2021	12:00 - 14:00	Wet
N/A	10	900	F	Adult	Lovely	26.9	23.2	27.9	Closed	Low	Sunny	Towards The Sun	Partially Exposed	Moving	N/A	11/25/2021	16:00 - Sunset	Wet
N/A	80	900	F	Adult	Lovely	26.9	23.2	27.9	Closed	Low	Cloudy	Towards The Sun	Cloudy Day	Foraging	N/A	11/25/2021	16:00 - Sunset	Wet
N/A	76	900	F	Adult	Lovely	26.9	23.2	27.9	Closed	Low	Cloudy	Towards The Sun	Cloudy Day	Moving	N/A	11/25/2021	16:00 - Sunset	Wet
N/A	734	900	F	Adult	Lovely	26.9	23.2	27.9	Closed	Low	Cloudy	Towards The Sun	Cloudy Day	Foraging	N/A	11/25/2021	16:00 - Sunset	Wet
N/A	282	900	F	Adult	Emily	26.3	30.5	36.1	Road	None	Cloudy	Towards The Sun	Cloudy Day	Vigilant	N/A	11/30/2021	12:00 - 14:00	Wet
N/A	383	900	F	Adult	Emily	26.3	30.5	36.1	Road	None	Cloudy	Partially Away From The Sun	Cloudy Day	Foraging	N/A	11/30/2021	12:00 - 14:00	Wet
N/A	44	900	F	Adult	Emily	26.3	30.5	36.1	Road	None	Cloudy	Directly Away From The Sun	Cloudy Day	Moving	N/A	11/30/2021	12:00 - 14:00	Wet
N/A	10	900	F	Adult	Emily	26.3	30.5	36.1	Road	None	Cloudy	Directly Away From The Sun	Cloudy Day	Vigilant	N/A	11/30/2021	12:00 - 14:00	Wet
N/A	47	900	F	Adult	Emily	26.3	30.5	36.1	Road	None	Cloudy	Directly Away From The Sun	Cloudy Day	Moving	N/A	11/30/2021	12:00 - 14:00	Wet
N/A	66	900	F	Adult	Emily	26.3	30.5	36.1	Road	None	Cloudy	Partially Away From The Sun	Cloudy Day	Vigilant	N/A	11/30/2021	12:00 - 14:00	Wet
N/A	24	900	F	Adult	Emily	26.3	30.5	36.1	Road	None	Cloudy	Partially Away From The Sun	Cloudy Day	Moving	N/A	11/30/2021	12:00 - 14:00	Wet
N/A	34	900	F	Adult	Emily	26.3	30.5	36.1	Road	None	Cloudy	Partially Away From The Sun	Cloudy Day	Foraging	N/A	11/30/2021	12:00 - 14:00	Wet
N/A	223	900	M	Adult	Sun	32.8	38.1	39	Closed	N/A	Sunny	Towards The Sun	Fully Exposed	Foraging	N/A	2021-02-12	Sunrise - 10:00	Wet
N/A	44	900	M	Adult	Sun	32.8	38.1	39	Closed	N/A	Sunny	Directly Away From The Sun	Fully Exposed	Moving	N/A	2021-02-12	Sunrise - 10:00	Wet
N/A	316	900	M	Adult	Sun	32.8	38.1	39	Closed	N/A	Sunny	Directly Away From The Sun	Fully Exposed	Foraging	N/A	2021-02-12	Sunrise - 10:00	Wet
N/A	317	900	M	Adult	Sun	32.8	38.1	39	Closed	N/A	Sunny	Partially Away From The Sun	Fully Exposed	Moving	N/A	2021-02-12	Sunrise - 10:00	Wet
N/A	181	900	M	Adult	Aquarius	32.8	38.1	39	Open	N/A	Sunny	Directly Away From The Sun	Fully Exposed	Foraging	Leaves	2021-02-12	Sunrise - 10:00	Wet
N/A	24	900	M	Adult	Aquarius	32.8	38.1	39	Open	N/A	Sunny	Partially Away From The Sun	Fully Exposed	Moving	N/A	2021-02-12	Sunrise - 10:00	Wet
N/A	107	900	M	Adult	Aquarius	32.8	38.1	39	Open	N/A	Sunny	Partially Away From The Sun	Fully Exposed	Foraging	Leaves	2021-02-12	Sunrise - 10:00	Wet
N/A	26	900	M	Adult	Aquarius	32.8	38.1	39	Open	N/A	Sunny	Directly Away From The Sun	Fully Exposed	Moving	N/A	2021-02-12	Sunrise - 10:00	Wet
N/A	71	900	M	Adult	Aquarius	32.8	38.1	39	Open	N/A	Sunny	Directly Away From The Sun	Fully Exposed	Foraging	Leaves	2021-02-12	Sunrise - 10:00	Wet
N/A	25	900	M	Adult	Aquarius	32.8	38.1	39	Open	N/A	Sunny	Partially Away From The Sun	Fully Exposed	Moving	N/A	2021-02-12	Sunrise - 10:00	Wet
N/A	106	900	M	Adult	Aquarius	32.8	38.1	39	Open	N/A	Sunny	Partially Away From The Sun	Fully Exposed	Foraging	Leaves	2021-02-12	Sunrise - 10:00	Wet
N/A	38	900	M	Adult	Aquarius	32.8	38.1	39	Open	N/A	Sunny	Partially Away From The Sun	Fully Exposed	Moving	N/A	2021-02-12	Sunrise - 10:00	Wet
N/A	120	900	M	Adult	Aquarius	32.8	38.1	39	Open	N/A	Sunny	Directly Away From The Sun	Fully Exposed	Foraging	Leaves	2021-02-12	Sunrise - 10:00	Wet
N/A	114	900	M	Adult	Aquarius	32.8	38.1	39	Open	N/A	Sunny	Towards The Sun	Fully Exposed	Foraging	Leaves	2021-02-12	Sunrise - 10:00	Wet
N/A	88	900	M	Adult	Aquarius	32.8	38.1	39	Open	N/A	Sunny	Directly Away From The Sun	Fully Exposed	Foraging	Leaves	2021-02-12	Sunrise - 10:00	Wet
N/A	64	900	M	Juvenile	Pika	32.8	38.1	39	Open	N/A	Sunny	Partially Away From The Sun	Fully Exposed	Moving	N/A	2021-02-12	Sunrise - 10:00	Wet
N/A	43	900	M	Juvenile	Pika	32.8	38.1	39	Open	N/A	Sunny	Partially Away From The Sun	Fully Exposed	Foraging	Branches	2021-02-12	Sunrise - 10:00	Wet
N/A	3	900	M	Juvenile	Pika	32.8	38.1	39	Open	N/A	Sunny	Partially Away From The Sun	Fully Exposed	Moving	N/A	2021-02-12	Sunrise - 10:00	Wet
N/A	10	900	M	Juvenile	Pika	32.8	38.1	39	Open	N/A	Sunny	Partially Away From The Sun	Fully Exposed	Foraging	Leaves	2021-02-12	Sunrise - 10:00	Wet
N/A	71	900	M	Juvenile	Pika	32.8	38.1	39	Open	N/A	Sunny	Directly Away From The Sun	Fully Exposed	Foraging	Leaves	2021-02-12	Sunrise - 10:00	Wet
N/A	33	900	M	Juvenile	Pika	32.8	38.1	39	Open	N/A	Sunny	Partially Away From The Sun	Fully Exposed	Moving	N/A	2021-02-12	Sunrise - 10:00	Wet
N/A	18	900	M	Juvenile	Pika	32.8	38.1	39	Open	N/A	Sunny	Partially Away From The Sun	Fully Exposed	Foraging	Leaves	2021-02-12	Sunrise - 10:00	Wet
N/A	77	900	M	Juvenile	Pika	32.8	38.1	39	Open	N/A	Sunny	Directly Away From The Sun	Fully Exposed	Moving	N/A	2021-02-12	Sunrise - 10:00	Wet
N/A	133	900	M	Juvenile	Pika	32.8	38.1	39	Open	N/A	Sunny	Directly Away From The Sun	Fully Exposed	Foraging	Leaves	2021-02-12	Sunrise - 10:00	Wet
N/A	112	900	M	Juvenile	Pika	32.8	38.1	39	Open	N/A	Sunny	Partially Away From The Sun	Fully Exposed	Moving	N/A	2021-02-12	Sunrise - 10:00	Wet
N/A	236	900	M	Juvenile	Pika	32.8	38.1	39	Open	N/A	Sunny	Partially Away From The Sun	Fully Exposed	Foraging	Leaves	2021-02-12	Sunrise - 10:00	Wet
N/A	42	900	M	Adult	Melman	32.8	38.1	39	Open	N/A	Sunny	Partially Away From The Sun	Fully Exposed	Vigilant	N/A	2021-02-12	Sunrise - 10:00	Wet
N/A	73	900	M	Adult	Melman	32.8	38.1	39	Open	N/A	Sunny	Partially Away From The Sun	Fully Exposed	Moving	N/A	2021-02-12	Sunrise - 10:00	Wet
N/A	38	900	M	Adult	Melman	32.8	38.1	39	Open	N/A	Sunny	Directly Away From The Sun	Fully Exposed	Vigilant	N/A	2021-02-12	Sunrise - 10:00	Wet
N/A	37	900	M	Adult	Melman	32.8	38.1	39	Open	N/A	Sunny	Directly Away From The Sun	Fully Exposed	Moving	N/A	2021-02-12	Sunrise - 10:00	Wet
N/A	49	900	M	Adult	Melman	32.8	38.1	39	Open	N/A	Sunny	Partially Away From The Sun	Fully Exposed	Vigilant	N/A	2021-02-12	Sunrise - 10:00	Wet
N/A	28	900	M	Adult	Melman	32.8	38.1	39	Open	N/A	Sunny	Directly Away From The Sun	Fully Exposed	Moving	N/A	2021-02-12	Sunrise - 10:00	Wet
N/A	72	900	M	Adult	Melman	32.8	38.1	39	Open	N/A	Sunny	Directly Away From The Sun	Fully Exposed	Vigilant	N/A	2021-02-12	Sunrise - 10:00	Wet
N/A	56	900	M	Adult	Melman	32.8	38.1	39	Open	N/A	Sunny	Partially Away From The Sun	Fully Exposed	Moving	N/A	2021-02-12	Sunrise - 10:00	Wet
N/A	65	900	M	Adult	Melman	32.8	38.1	39	Open	N/A	Sunny	Towards The Sun	Partially Exposed	Drinking	N/A	2021-02-12	Sunrise - 10:00	Wet
N/A	89	900	M	Adult	Melman	32.8	38.1	39	Open	N/A	Sunny	Towards The Sun	Partially Exposed	Vigilant	N/A	2021-02-12	Sunrise - 10:00	Wet
N/A	79	900	M	Adult	Melman	32.8	38.1	39	Open	N/A	Sunny	Directly Away From The Sun	Fully Exposed	Moving	N/A	2021-02-12	Sunrise - 10:00	Wet
N/A	23	900	M	Adult	Melman	32.8	38.1	39	Open	N/A	Sunny	Directly Away From The Sun	Fully Exposed	Vigilant	N/A	2021-02-12	Sunrise - 10:00	Wet
N/A	49	900	M	Adult	Melman	32.8	38.1	39	Open	N/A	Sunny	Directly Away From The Sun	Fully Exposed	Moving	N/A	2021-02-12	Sunrise - 10:00	Wet
N/A	107	900	M	Juvenile	Eswatini	27.3	34	39.4	Open	N/A	Cloudy	Partially Away From The Sun	Cloudy Day	Interacting	N/A	2021-03-12	12:00 - 14:00	Wet
N/A	20	900	M	Juvenile	Eswatini	27.3	34	39.4	Open	N/A	Cloudy	Directly Away From The Sun	Cloudy Day	Vigilant	N/A	2021-03-12	12:00 - 14:00	Wet
N/A	102	900	M	Juvenile	Eswatini	27.3	34	39.4	Open	N/A	Cloudy	Partially Away From The Sun	Cloudy Day	Moving	N/A	2021-03-12	12:00 - 14:00	Wet
N/A	5	900	M	Juvenile	Eswatini	27.3	34	39.4	Open	N/A	Sunny	Partially Away From The Sun	Partially Exposed	Vigilant	N/A	2021-03-12	12:00 - 14:00	Wet
N/A	5	900	M	Juvenile	Eswatini	27.3	34	39.4	Open	N/A	Sunny	Directly Away From The Sun	Partially Exposed	Moving	N/A	2021-03-12	12:00 - 14:00	Wet
N/A	36	900	M	Juvenile	Eswatini	27.3	34	39.4	Open	N/A	Sunny	Partially Away From The Sun	Fully Exposed	Vigilant	N/A	2021-03-12	12:00 - 14:00	Wet
N/A	8	900	M	Juvenile	Eswatini	27.3	34	39.4	Open	N/A	Sunny	Partially Away From The Sun	Fully Exposed	Moving	N/A	2021-03-12	12:00 - 14:00	Wet
N/A	17	900	M	Juvenile	Eswatini	27.3	34	39.4	Open	N/A	Sunny	Partially Away From The Sun	Fully Exposed	Vigilant	N/A	2021-03-12	12:00 - 14:00	Wet
N/A	69	900	M	Juvenile	Eswatini	27.3	34	39.4	Open	N/A	Sunny	Partially Away From The Sun	Fully Exposed	Moving	N/A	2021-03-12	12:00 - 14:00	Wet
N/A	22	900	M	Juvenile	Eswatini	27.3	34	39.4	Open	N/A	Sunny	Partially Away From The Sun	Partially Exposed	Vigilant	N/A	2021-03-12	12:00 - 14:00	Wet
N/A	82	900	M	Juvenile	Eswatini	27.3	34	39.4	Open	N/A	Sunny	Partially Away From The Sun	Partially Exposed	Moving	N/A	2021-03-12	12:00 - 14:00	Wet
N/A	159	900	M	Juvenile	Eswatini	27.3	34	39.4	Open	N/A	Cloudy	Partially Away From The Sun	Cloudy Day	Vigilant	N/A	2021-03-12	12:00 - 14:00	Wet
N/A	19	900	M	Juvenile	Eswatini	27.3	34	39.4	Open	N/A	Cloudy	Towards The Sun	Cloudy Day	Moving	N/A	2021-03-12	12:00 - 14:00	Wet
N/A	249	900	M	Juvenile	Eswatini	27.3	34	39.4	Open	N/A	Cloudy	Towards The Sun	Cloudy Day	Interacting	N/A	2021-03-12	12:00 - 14:00	Wet
N/A	19	536	M	Juvenile	Banana	27.3	34	39.4	Open	N/A	Sunny	Partially Away From The Sun	Partially Exposed	Vigilant	N/A	2021-03-12	12:00 - 14:00	Wet
N/A	6	536	M	Juvenile	Banana	27.3	34	39.4	Open	N/A	Sunny	Partially Away From The Sun	Fully Exposed	Moving	N/A	2021-03-12	12:00 - 14:00	Wet
N/A	105	536	M	Juvenile	Banana	27.3	34	39.4	Open	N/A	Sunny	Partially Away From The Sun	Partially Exposed	Vigilant	N/A	2021-03-12	12:00 - 14:00	Wet
N/A	50	536	M	Juvenile	Banana	27.3	34	39.4	Open	N/A	Sunny	Partially Away From The Sun	Partially Exposed	Foraging	Leaves	2021-03-12	12:00 - 14:00	Wet
N/A	23	536	M	Juvenile	Banana	27.3	34	39.4	Open	N/A	Sunny	Partially Away From The Sun	Fully Exposed	Moving	N/A	2021-03-12	12:00 - 14:00	Wet
N/A	13	536	M	Juvenile	Banana	27.3	34	39.4	Open	N/A	Sunny	Partially Away From The Sun	Partially Exposed	Vigilant	N/A	2021-03-12	12:00 - 14:00	Wet
N/A	63	536	M	Juvenile	Banana	27.3	34	39.4	Open	N/A	Sunny	Partially Away From The Sun	Fully Exposed	Moving	N/A	2021-03-12	12:00 - 14:00	Wet
N/A	27	536	M	Juvenile	Banana	27.3	34	39.4	Open	N/A	Sunny	Partially Away From The Sun	No Exposure	Vigilant	N/A	2021-03-12	12:00 - 14:00	Wet
N/A	46	536	M	Juvenile	Banana	27.3	34	39.4	Open	N/A	Sunny	Directly Away From The Sun	No Exposure	Vigilant	N/A	2021-03-12	12:00 - 14:00	Wet
N/A	84	536	M	Juvenile	Banana	27.3	34	39.4	Open	N/A	Sunny	Directly Away From The Sun	No Exposure	Moving	N/A	2021-03-12	12:00 - 14:00	Wet
N/A	105	900	F	Adult	Noumea	28.4	31.9	33.4	Closed	N/A	Sunny	Towards The Sun	Fully Exposed	Vigilant	N/A	2021-06-12	12:00 - 14:00	Wet
N/A	32	900	F	Adult	Noumea	28.4	31.9	33.4	Closed	N/A	Sunny	Directly Away From The Sun	Fully Exposed	Vigilant	N/A	2021-06-12	12:00 - 14:00	Wet
N/A	12	900	F	Adult	Noumea	28.4	31.9	33.4	Closed	N/A	Sunny	Directly Away From The Sun	Fully Exposed	Moving	N/A	2021-06-12	12:00 - 14:00	Wet
N/A	88	900	F	Adult	Noumea	28.4	31.9	33.4	Closed	N/A	Sunny	Towards The Sun	Fully Exposed	Vigilant	N/A	2021-06-12	12:00 - 14:00	Wet
N/A	3	900	F	Adult	Noumea	28.4	31.9	33.4	Closed	N/A	Sunny	Directly Away From The Sun	Fully Exposed	Vigilant	N/A	2021-06-12	12:00 - 14:00	Wet
N/A	13	900	F	Adult	Noumea	28.4	31.9	33.4	Closed	N/A	Sunny	Towards The Sun	Fully Exposed	Vigilant	N/A	2021-06-12	12:00 - 14:00	Wet
N/A	76	900	F	Adult	Noumea	28.4	31.9	33.4	Closed	N/A	Sunny	Directly Away From The Sun	Fully Exposed	Moving	N/A	2021-06-12	12:00 - 14:00	Wet
N/A	73	900	F	Adult	Noumea	28.4	31.9	33.4	Closed	N/A	Sunny	Partially Away From The Sun	Fully Exposed	Vigilant	N/A	2021-06-12	12:00 - 14:00	Wet
N/A	56	900	F	Adult	Noumea	28.4	31.9	33.4	Closed	N/A	Sunny	Directly Away From The Sun	Fully Exposed	Moving	N/A	2021-06-12	12:00 - 14:00	Wet
N/A	3	900	F	Adult	Noumea	28.4	31.9	33.4	Closed	N/A	Sunny	Partially Away From The Sun	Fully Exposed	Moving	N/A	2021-06-12	12:00 - 14:00	Wet
N/A	29	900	F	Adult	Noumea	28.4	31.9	33.4	Closed	N/A	Sunny	Directly Away From The Sun	Fully Exposed	Vigilant	N/A	2021-06-12	12:00 - 14:00	Wet
N/A	4	900	F	Adult	Noumea	28.4	31.9	33.4	Closed	N/A	Sunny	Directly Away From The Sun	Fully Exposed	Moving	N/A	2021-06-12	12:00 - 14:00	Wet
N/A	29	900	F	Adult	Noumea	28.4	31.9	33.4	Closed	N/A	Sunny	Directly Away From The Sun	Fully Exposed	Vigilant	N/A	2021-06-12	12:00 - 14:00	Wet
N/A	41	900	F	Adult	Noumea	28.4	31.9	33.4	Closed	N/A	Sunny	Directly Away From The Sun	Fully Exposed	Moving	N/A	2021-06-12	12:00 - 14:00	Wet
N/A	41	900	F	Adult	Noumea	28.4	31.9	33.4	Closed	N/A	Sunny	Partially Away From The Sun	Fully Exposed	Vigilant	N/A	2021-06-12	12:00 - 14:00	Wet
N/A	14	900	F	Adult	Noumea	28.4	31.9	33.4	Closed	N/A	Sunny	Directly Away From The Sun	Fully Exposed	Moving	N/A	2021-06-12	12:00 - 14:00	Wet
N/A	281	900	F	Adult	Noumea	28.4	31.9	33.4	Closed	N/A	Sunny	Partially Away From The Sun	Fully Exposed	Vigilant	N/A	2021-06-12	12:00 - 14:00	Wet
N/A	62	900	M	Adult	Lovely	28.4	31.9	33.4	Closed	N/A	Sunny	Directly Away From The Sun	Fully Exposed	Vigilant	N/A	2021-06-12	12:00 - 14:00	Wet
N/A	52	900	M	Adult	Lovely	28.4	31.9	33.4	Closed	N/A	Sunny	Partially Away From The Sun	Fully Exposed	Moving	N/A	2021-06-12	12:00 - 14:00	Wet
N/A	57	900	M	Adult	Lovely	28.4	31.9	33.4	Closed	N/A	Sunny	Towards The Sun	Partially Exposed	Foraging	Leaves	2021-06-12	12:00 - 14:00	Wet
N/A	58	900	M	Adult	Lovely	28.4	31.9	33.4	Closed	N/A	Sunny	Partially Away From The Sun	Partially Exposed	Foraging	Leaves	2021-06-12	12:00 - 14:00	Wet
N/A	64	900	M	Adult	Lovely	28.4	31.9	33.4	Closed	N/A	Sunny	Partially Away From The Sun	Partially Exposed	Interacting	N/A	2021-06-12	12:00 - 14:00	Wet
N/A	100	900	M	Adult	Lovely	28.4	31.9	33.4	Closed	N/A	Sunny	Partially Away From The Sun	Partially Exposed	Foraging	Leaves	2021-06-12	12:00 - 14:00	Wet
N/A	27	900	M	Adult	Lovely	28.4	31.9	33.4	Closed	N/A	Sunny	Partially Away From The Sun	Fully Exposed	Moving	N/A	2021-06-12	12:00 - 14:00	Wet
N/A	60	900	M	Adult	Lovely	28.4	31.9	33.4	Closed	N/A	Sunny	Directly Away From The Sun	Fully Exposed	Moving	N/A	2021-06-12	12:00 - 14:00	Wet
N/A	88	900	M	Adult	Lovely	28.4	31.9	33.4	Closed	N/A	Sunny	Partially Away From The Sun	No Exposure	Vigilant	N/A	2021-06-12	12:00 - 14:00	Wet
N/A	48	900	M	Adult	Lovely	28.4	31.9	33.4	Closed	N/A	Sunny	Partially Away From The Sun	No Exposure	Vigilant	N/A	2021-06-12	12:00 - 14:00	Wet
N/A	76	900	M	Adult	Lovely	28.4	31.9	33.4	Closed	N/A	Sunny	Directly Away From The Sun	Partially Exposed	Moving	N/A	2021-06-12	12:00 - 14:00	Wet
N/A	208	900	M	Adult	Lovely	28.4	31.9	33.4	Closed	N/A	Sunny	Partially Away From The Sun	Fully Exposed	Foraging	Leaves	2021-06-12	12:00 - 14:00	Wet
N/A	7	850	M	Juvenile	Nairobi	28.4	31.9	33.4	Closed	N/A	Sunny	Directly Away From The Sun	Fully Exposed	Vigilant	N/A	2021-06-12	12:00 - 14:00	Wet
N/A	76	850	M	Juvenile	Nairobi	28.4	31.9	33.4	Closed	N/A	Sunny	Partially Away From The Sun	Fully Exposed	Moving	N/A	2021-06-12	12:00 - 14:00	Wet
N/A	64	850	M	Juvenile	Nairobi	28.4	31.9	33.4	Closed	N/A	Sunny	Directly Away From The Sun	Fully Exposed	Moving	N/A	2021-06-12	12:00 - 14:00	Wet
N/A	42	850	M	Juvenile	Nairobi	28.4	31.9	33.4	Closed	N/A	Sunny	Directly Away From The Sun	Fully Exposed	Vigilant	N/A	2021-06-12	12:00 - 14:00	Wet
N/A	21	850	M	Juvenile	Nairobi	28.4	31.9	33.4	Closed	N/A	Sunny	Partially Away From The Sun	Fully Exposed	Moving	N/A	2021-06-12	12:00 - 14:00	Wet
N/A	7	850	M	Juvenile	Nairobi	28.4	31.9	33.4	Closed	N/A	Sunny	Partially Away From The Sun	Fully Exposed	Vigilant	N/A	2021-06-12	12:00 - 14:00	Wet
N/A	59	850	M	Juvenile	Nairobi	28.4	31.9	33.4	Closed	N/A	Sunny	Directly Away From The Sun	Fully Exposed	Moving	N/A	2021-06-12	12:00 - 14:00	Wet
N/A	45	850	M	Juvenile	Nairobi	28.4	31.9	33.4	Closed	N/A	Sunny	Partially Away From The Sun	Fully Exposed	Vigilant	N/A	2021-06-12	12:00 - 14:00	Wet
N/A	67	850	M	Juvenile	Nairobi	28.4	31.9	33.4	Closed	N/A	Sunny	Partially Away From The Sun	Fully Exposed	Foraging	Leaves	2021-06-12	12:00 - 14:00	Wet
N/A	71	850	M	Juvenile	Nairobi	28.4	31.9	33.4	Closed	N/A	Sunny	Partially Away From The Sun	Fully Exposed	Vigilant	N/A	2021-06-12	12:00 - 14:00	Wet
N/A	91	850	M	Juvenile	Nairobi	28.4	31.9	33.4	Closed	N/A	Sunny	Directly Away From The Sun	Fully Exposed	Vigilant	N/A	2021-06-12	12:00 - 14:00	Wet
N/A	58	850	M	Juvenile	Nairobi	28.4	31.9	33.4	Closed	N/A	Sunny	Directly Away From The Sun	Fully Exposed	Moving	N/A	2021-06-12	12:00 - 14:00	Wet
N/A	26	850	M	Juvenile	Nairobi	28.4	31.9	33.4	Closed	N/A	Sunny	Directly Away From The Sun	Fully Exposed	Vigilant	N/A	2021-06-12	12:00 - 14:00	Wet
N/A	82	850	M	Juvenile	Nairobi	28.4	31.9	33.4	Closed	N/A	Sunny	Partially Away From The Sun	Fully Exposed	Foraging	Leaves	2021-06-12	12:00 - 14:00	Wet
N/A	29	850	M	Juvenile	Nairobi	28.4	31.9	33.4	Closed	N/A	Sunny	Directly Away From The Sun	Fully Exposed	Moving	N/A	2021-06-12	12:00 - 14:00	Wet
N/A	1	850	M	Juvenile	Nairobi	28.4	31.9	33.4	Closed	N/A	Sunny	Partially Away From The Sun	Fully Exposed	Vigilant	N/A	2021-06-12	12:00 - 14:00	Wet
N/A	18	850	M	Juvenile	Nairobi	28.4	31.9	33.4	Closed	N/A	Sunny	Directly Away From The Sun	Fully Exposed	Moving	N/A	2021-06-12	12:00 - 14:00	Wet
N/A	86	850	M	Juvenile	Nairobi	28.4	31.9	33.4	Closed	N/A	Sunny	Towards The Sun	Fully Exposed	Foraging	Leaves	2021-06-12	12:00 - 14:00	Wet
N/A	205	900	F	Adult	Pex	24.5	24.3	27.4	Closed	N/A	Rainy	N/A	Cloudy Day	Vigilant	N/A	2021-08-12	Sunrise - 10:00	Wet
N/A	15	900	F	Adult	Pex	24.5	24.3	27.4	Closed	N/A	Rainy	N/A	Cloudy Day	Moving	N/A	2021-08-12	Sunrise - 10:00	Wet
N/A	144	900	F	Adult	Pex	24.5	24.3	27.4	Closed	N/A	Rainy	N/A	Cloudy Day	Vigilant	N/A	2021-08-12	Sunrise - 10:00	Wet
N/A	13	900	F	Adult	Pex	24.5	24.3	27.4	Closed	N/A	Rainy	N/A	Cloudy Day	Moving	N/A	2021-08-12	Sunrise - 10:00	Wet
N/A	157	900	F	Adult	Pex	24.5	24.3	27.4	Closed	N/A	Rainy	N/A	Cloudy Day	Vigilant	N/A	2021-08-12	Sunrise - 10:00	Wet
N/A	84	900	F	Adult	Pex	24.5	24.3	27.4	Closed	N/A	Rainy	N/A	Cloudy Day	Interacting	N/A	2021-08-12	Sunrise - 10:00	Wet
N/A	49	900	F	Adult	Pex	24.5	24.3	27.4	Closed	N/A	Rainy	N/A	Cloudy Day	Vigilant	N/A	2021-08-12	Sunrise - 10:00	Wet
N/A	60	900	F	Adult	Pex	24.5	24.3	27.4	Closed	N/A	Rainy	N/A	Cloudy Day	Moving	N/A	2021-08-12	Sunrise - 10:00	Wet
N/A	173	900	F	Adult	Pex	24.5	24.3	27.4	Closed	N/A	Rainy	N/A	Cloudy Day	Foraging	Leaves	2021-08-12	Sunrise - 10:00	Wet
N/A	40	900	F	Adult	Kagiso	24.5	24.3	27.4	Closed	N/A	Rainy	N/A	Cloudy Day	Foraging	Leaves	2021-08-12	Sunrise - 10:00	Wet
N/A	88	900	F	Adult	Kagiso	24.5	24.3	27.4	Closed	N/A	Rainy	N/A	Cloudy Day	Moving	N/A	2021-08-12	Sunrise - 10:00	Wet
N/A	29	900	F	Adult	Kagiso	24.5	24.3	27.4	Closed	N/A	Rainy	N/A	Cloudy Day	Foraging	Leaves	2021-08-12	Sunrise - 10:00	Wet
N/A	34	900	F	Adult	Kagiso	24.5	24.3	27.4	Closed	N/A	Rainy	N/A	Cloudy Day	Moving	N/A	2021-08-12	Sunrise - 10:00	Wet
N/A	127	900	F	Adult	Kagiso	24.5	24.3	27.4	Closed	N/A	Rainy	N/A	Cloudy Day	Foraging	Leaves	2021-08-12	Sunrise - 10:00	Wet
N/A	12	900	F	Adult	Kagiso	24.5	24.3	27.4	Closed	N/A	Rainy	N/A	Cloudy Day	Moving	N/A	2021-08-12	Sunrise - 10:00	Wet
N/A	570	900	F	Adult	Kagiso	24.5	24.3	27.4	Closed	N/A	Rainy	N/A	Cloudy Day	Foraging	Leaves	2021-08-12	Sunrise - 10:00	Wet
N/A	70	550	F	Adult	Nala	24.5	24.3	27.4	Closed	N/A	Rainy	N/A	Cloudy Day	Foraging	Leaves	2021-08-12	Sunrise - 10:00	Wet
N/A	20	550	F	Adult	Nala	24.5	24.3	27.4	Closed	N/A	Rainy	N/A	Cloudy Day	Moving	N/A	2021-08-12	Sunrise - 10:00	Wet
N/A	64	550	F	Adult	Nala	24.5	24.3	27.4	Closed	N/A	Rainy	N/A	Cloudy Day	Foraging	Leaves	2021-08-12	Sunrise - 10:00	Wet
N/A	31	550	F	Adult	Nala	24.5	24.3	27.4	Closed	N/A	Rainy	N/A	Cloudy Day	Moving	N/A	2021-08-12	Sunrise - 10:00	Wet
N/A	83	550	F	Adult	Nala	24.5	24.3	27.4	Closed	N/A	Rainy	N/A	Cloudy Day	Foraging	Leaves	2021-08-12	Sunrise - 10:00	Wet
N/A	24	550	F	Adult	Nala	24.5	24.3	27.4	Closed	N/A	Rainy	N/A	Cloudy Day	Moving	N/A	2021-08-12	Sunrise - 10:00	Wet
N/A	172	550	F	Adult	Nala	24.5	24.3	27.4	Closed	N/A	Rainy	N/A	Cloudy Day	Foraging	Leaves	2021-08-12	Sunrise - 10:00	Wet
N/A	54	550	F	Adult	Nala	24.5	24.3	27.4	Closed	N/A	Rainy	N/A	Cloudy Day	Moving	N/A	2021-08-12	Sunrise - 10:00	Wet
N/A	32	550	F	Adult	Nala	24.5	24.3	27.4	Closed	N/A	Rainy	N/A	Cloudy Day	Vigilant	N/A	2021-08-12	Sunrise - 10:00	Wet
N/A	109	900	M	Adult	Melman	25.2	27.9	31.4	Closed	N/A	Overcast	N/A	Cloudy Day	Vigilant	N/A	2021-09-12	12:00 - 14:00	Wet
N/A	16	900	M	Adult	Melman	25.2	27.9	31.4	Closed	N/A	Overcast	N/A	Cloudy Day	Moving	N/A	2021-09-12	12:00 - 14:00	Wet
N/A	10	900	M	Adult	Melman	25.2	27.9	31.4	Closed	N/A	Overcast	N/A	Cloudy Day	Vigilant	N/A	2021-09-12	12:00 - 14:00	Wet
N/A	45	900	M	Adult	Melman	25.2	27.9	31.4	Closed	N/A	Overcast	N/A	Cloudy Day	Foraging	Leaves	2021-09-12	12:00 - 14:00	Wet
N/A	20	900	M	Adult	Melman	25.2	27.9	31.4	Closed	N/A	Overcast	N/A	Cloudy Day	Moving	N/A	2021-09-12	12:00 - 14:00	Wet
N/A	359	900	M	Adult	Melman	25.2	27.9	31.4	Closed	N/A	Overcast	N/A	Cloudy Day	Foraging	Leaves	2021-09-12	12:00 - 14:00	Wet
N/A	23	900	M	Adult	Melman	25.2	27.9	31.4	Closed	N/A	Overcast	N/A	Cloudy Day	Moving	N/A	2021-09-12	12:00 - 14:00	Wet
N/A	211	900	M	Adult	Melman	25.2	27.9	31.4	Closed	N/A	Overcast	N/A	Cloudy Day	Foraging	Leaves	2021-09-12	12:00 - 14:00	Wet
N/A	26	900	M	Adult	Melman	25.2	27.9	31.4	Closed	N/A	Overcast	N/A	Cloudy Day	Moving	N/A	2021-09-12	12:00 - 14:00	Wet
N/A	81	900	M	Adult	Melman	25.2	27.9	31.4	Closed	N/A	Overcast	N/A	Cloudy Day	Foraging	Leaves	2021-09-12	12:00 - 14:00	Wet
N/A	23	900	F	Adult	Wolke	25.2	27.9	31.4	Closed	N/A	Overcast	N/A	Cloudy Day	Moving	N/A	2021-09-12	12:00 - 14:00	Wet
N/A	21	900	F	Adult	Wolke	25.2	27.9	31.4	Closed	N/A	Overcast	N/A	Cloudy Day	Vigilant	N/A	2021-09-12	12:00 - 14:00	Wet
N/A	55	900	F	Adult	Wolke	25.2	27.9	31.4	Closed	N/A	Overcast	N/A	Cloudy Day	Moving	N/A	2021-09-12	12:00 - 14:00	Wet
N/A	19	900	F	Adult	Wolke	25.2	27.9	31.4	Closed	N/A	Overcast	N/A	Cloudy Day	Vigilant	N/A	2021-09-12	12:00 - 14:00	Wet
N/A	52	900	F	Adult	Wolke	25.2	27.9	31.4	Closed	N/A	Overcast	N/A	Cloudy Day	Moving	N/A	2021-09-12	12:00 - 14:00	Wet
N/A	17	900	F	Adult	Wolke	25.2	27.9	31.4	Closed	N/A	Overcast	N/A	Cloudy Day	Vigilant	N/A	2021-09-12	12:00 - 14:00	Wet
N/A	66	900	F	Adult	Wolke	25.2	27.9	31.4	Road	N/A	Overcast	N/A	Cloudy Day	Moving	N/A	2021-09-12	12:00 - 14:00	Wet
N/A	39	900	F	Adult	Wolke	25.2	27.9	31.4	Road	N/A	Overcast	N/A	Cloudy Day	Foraging	Leaves	2021-09-12	12:00 - 14:00	Wet
N/A	60	900	F	Adult	Wolke	25.2	27.9	31.4	Road	N/A	Overcast	N/A	Cloudy Day	Moving	N/A	2021-09-12	12:00 - 14:00	Wet
N/A	30	900	F	Adult	Wolke	25.2	27.9	31.4	Road	N/A	Overcast	N/A	Cloudy Day	Vigilant	N/A	2021-09-12	12:00 - 14:00	Wet
N/A	35	900	F	Adult	Wolke	25.2	27.9	31.4	Road	N/A	Overcast	N/A	Cloudy Day	Foraging	Leaves	2021-09-12	12:00 - 14:00	Wet
N/A	13	900	F	Adult	Wolke	25.2	27.9	31.4	Road	N/A	Overcast	N/A	Cloudy Day	Moving	N/A	2021-09-12	12:00 - 14:00	Wet
N/A	430	900	F	Adult	Wolke	25.2	27.9	31.4	Road	N/A	Overcast	N/A	Cloudy Day	Foraging	Leaves	2021-09-12	12:00 - 14:00	Wet
N/A	31	900	F	Adult	Flower	25.2	27.9	31.4	Road	N/A	Cloudy	Partially Away From The Sun	Partially Exposed	Vigilant	N/A	2021-09-12	12:00 - 14:00	Wet
N/A	22	900	F	Adult	Flower	25.2	27.9	31.4	Road	N/A	Cloudy	Towards The Sun	Partially Exposed	Moving	N/A	2021-09-12	12:00 - 14:00	Wet
N/A	158	900	F	Adult	Flower	25.2	27.9	31.4	Road	N/A	Cloudy	Towards The Sun	Partially Exposed	Vigilant	N/A	2021-09-12	12:00 - 14:00	Wet
N/A	25	900	F	Adult	Flower	25.2	27.9	31.4	Road	N/A	Cloudy	Towards The Sun	Cloudy Day	Vigilant	N/A	2021-09-12	12:00 - 14:00	Wet
N/A	664	900	F	Adult	Flower	25.2	27.9	31.4	Road	N/A	Cloudy	Towards The Sun	Cloudy Day	Foraging	Leaves	2021-09-12	12:00 - 14:00	Wet
N/A	109	900	F	Adult	Madame Butterfly	25.2	27.9	31.4	Closed	N/A	Overcast	N/A	Cloudy Day	Foraging	Leaves	2021-09-12	12:00 - 14:00	Wet
N/A	5	900	F	Adult	Madame Butterfly	25.2	27.9	31.4	Closed	N/A	Overcast	N/A	Cloudy Day	Moving	N/A	2021-09-12	12:00 - 14:00	Wet
N/A	68	900	F	Adult	Madame Butterfly	25.2	27.9	31.4	Closed	N/A	Overcast	N/A	Cloudy Day	Foraging	Leaves	2021-09-12	12:00 - 14:00	Wet
N/A	2	900	F	Adult	Madame Butterfly	25.2	27.9	31.4	Closed	N/A	Overcast	N/A	Cloudy Day	Moving	N/A	2021-09-12	12:00 - 14:00	Wet
N/A	51	900	F	Adult	Madame Butterfly	25.2	27.9	31.4	Closed	N/A	Overcast	N/A	Cloudy Day	Foraging	Leaves	2021-09-12	12:00 - 14:00	Wet
N/A	8	900	F	Adult	Madame Butterfly	25.2	27.9	31.4	Closed	N/A	Overcast	N/A	Cloudy Day	Moving	N/A	2021-09-12	12:00 - 14:00	Wet
N/A	111	900	F	Adult	Madame Butterfly	25.2	27.9	31.4	Closed	N/A	Overcast	N/A	Cloudy Day	Foraging	Leaves	2021-09-12	12:00 - 14:00	Wet
N/A	7	900	F	Adult	Madame Butterfly	25.2	27.9	31.4	Closed	N/A	Overcast	N/A	Cloudy Day	Moving	N/A	2021-09-12	12:00 - 14:00	Wet
N/A	421	900	F	Adult	Madame Butterfly	25.2	27.9	31.4	Closed	N/A	Overcast	N/A	Cloudy Day	Foraging	Leaves	2021-09-12	12:00 - 14:00	Wet
N/A	198	900	M	Adult	Polp	30.2	30.1	31.4	Road	N/A	Cloudy	Partially Away From The Sun	Partially Exposed	Moving	N/A	2021-09-12	16:00 - Sunset	Wet
N/A	27	900	M	Adult	Polp	30.2	30.1	31.4	Road	N/A	Cloudy	Partially Away From The Sun	Partially Exposed	Vigilant	N/A	2021-09-12	16:00 - Sunset	Wet
N/A	53	900	M	Adult	Polp	30.2	30.1	31.4	Road	N/A	Cloudy	Partially Away From The Sun	Partially Exposed	Moving	N/A	2021-09-12	16:00 - Sunset	Wet
N/A	37	900	M	Adult	Polp	30.2	30.1	31.4	Closed	N/A	Cloudy	Partially Away From The Sun	Partially Exposed	Moving	N/A	2021-09-12	16:00 - Sunset	Wet
N/A	24	900	M	Adult	Polp	30.2	30.1	31.4	Closed	N/A	Sunny	Directly Away From The Sun	Partially Exposed	Vigilant	N/A	2021-09-12	16:00 - Sunset	Wet
N/A	25	900	M	Adult	Polp	30.2	30.1	31.4	Closed	N/A	Sunny	Directly Away From The Sun	Partially Exposed	Moving	N/A	2021-09-12	16:00 - Sunset	Wet
N/A	81	900	M	Adult	Polp	30.2	30.1	31.4	Closed	N/A	Sunny	Towards The Sun	Partially Exposed	Foraging	Leaves	2021-09-12	16:00 - Sunset	Wet
N/A	85	900	M	Adult	Polp	30.2	30.1	31.4	Closed	N/A	Sunny	Partially Away From The Sun	Partially Exposed	Moving	N/A	2021-09-12	16:00 - Sunset	Wet
N/A	36	900	M	Adult	Polp	30.2	30.1	31.4	Closed	N/A	Sunny	Directly Away From The Sun	Fully Exposed	Foraging	Leaves	2021-09-12	16:00 - Sunset	Wet
N/A	39	900	M	Adult	Polp	30.2	30.1	31.4	Closed	N/A	Sunny	Partially Away From The Sun	Fully Exposed	Moving	N/A	2021-09-12	16:00 - Sunset	Wet
N/A	110	900	M	Adult	Polp	30.2	30.1	31.4	Open	N/A	Sunny	Partially Away From The Sun	Fully Exposed	Moving	N/A	2021-09-12	16:00 - Sunset	Wet
N/A	65	900	M	Adult	Polp	30.2	30.1	31.4	Open	N/A	Sunny	Directly Away From The Sun	Fully Exposed	Moving	N/A	2021-09-12	16:00 - Sunset	Wet
N/A	54	900	M	Adult	Polp	30.2	30.1	31.4	Open	N/A	Sunny	Directly Away From The Sun	Fully Exposed	Interacting	N/A	2021-09-12	16:00 - Sunset	Wet
N/A	66	900	M	Adult	Polp	30.2	30.1	31.4	Open	N/A	Sunny	Towards The Sun	Partially Exposed	Interacting	N/A	2021-09-12	16:00 - Sunset	Wet
N/A	34	781	F	Adult	Berthille	32.2	30.1	31.4	Open	N/A	Sunny	Towards The Sun	Fully Exposed	Vigilant	N/A	12/13/2021	16:00 - Sunset	Wet
N/A	25	781	F	Adult	Berthille	32.2	30.1	31.4	Open	N/A	Cloudy	Partially Away From The Sun	Fully Exposed	Moving	N/A	12/13/2021	16:00 - Sunset	Wet
N/A	29	781	F	Adult	Berthille	32.2	30.1	31.4	Open	N/A	Sunny	Directly Away From The Sun	Partially Exposed	Vigilant	N/A	12/13/2021	16:00 - Sunset	Wet
N/A	20	781	F	Adult	Berthille	32.2	30.1	31.4	Open	N/A	Sunny	Towards The Sun	Fully Exposed	Moving	N/A	12/13/2021	16:00 - Sunset	Wet
N/A	105	781	F	Adult	Berthille	32.2	30.1	31.4	Open	N/A	Sunny	Towards The Sun	Fully Exposed	Vigilant	N/A	12/13/2021	16:00 - Sunset	Wet
N/A	46	781	F	Adult	Berthille	32.2	30.1	31.4	Open	N/A	Sunny	Directly Away From The Sun	Fully Exposed	Vigilant	N/A	12/13/2021	16:00 - Sunset	Wet
N/A	55	781	F	Adult	Berthille	32.2	30.1	31.4	Open	N/A	Sunny	Directly Away From The Sun	Fully Exposed	Moving	N/A	12/13/2021	16:00 - Sunset	Wet
N/A	66	781	F	Adult	Berthille	32.2	30.1	31.4	Open	N/A	Sunny	Partially Away From The Sun	Fully Exposed	Vigilant	N/A	12/13/2021	16:00 - Sunset	Wet
N/A	20	781	F	Adult	Berthille	32.2	30.1	31.4	Open	N/A	Sunny	Partially Away From The Sun	Fully Exposed	Foraging	Leaves	12/13/2021	16:00 - Sunset	Wet
N/A	53	781	F	Adult	Berthille	32.2	30.1	31.4	Open	N/A	Sunny	Directly Away From The Sun	Fully Exposed	Moving	N/A	12/13/2021	16:00 - Sunset	Wet
N/A	70	781	F	Adult	Berthille	32.2	30.1	31.4	Open	N/A	Sunny	Directly Away From The Sun	Partially Exposed	Vigilant	N/A	12/13/2021	16:00 - Sunset	Wet
N/A	107	781	F	Adult	Berthille	32.2	30.1	31.4	Open	N/A	Sunny	Towards The Sun	Partially Exposed	Foraging	Leaves	12/13/2021	16:00 - Sunset	Wet
N/A	36	781	F	Adult	Berthille	32.2	30.1	31.4	Open	N/A	Sunny	Directly Away From The Sun	Partially Exposed	Vigilant	N/A	12/13/2021	16:00 - Sunset	Wet
N/A	9	781	F	Adult	Berthille	32.2	30.1	31.4	Open	N/A	Sunny	Directly Away From The Sun	Fully Exposed	Moving	N/A	12/13/2021	16:00 - Sunset	Wet
N/A	18	781	F	Adult	Berthille	32.2	30.1	31.4	Open	N/A	Sunny	Directly Away From The Sun	Fully Exposed	Vigilant	N/A	12/13/2021	16:00 - Sunset	Wet
N/A	4	781	F	Adult	Berthille	32.2	30.1	31.4	Open	N/A	Sunny	Partially Away From The Sun	Fully Exposed	Moving	N/A	12/13/2021	16:00 - Sunset	Wet
N/A	71	781	F	Adult	Berthille	32.2	30.1	31.4	Open	N/A	Sunny	Partially Away From The Sun	Partially Exposed	Vigilant	N/A	12/13/2021	16:00 - Sunset	Wet
N/A	12	781	F	Adult	Berthille	32.2	30.1	31.4	Open	N/A	Sunny	Directly Away From The Sun	Fully Exposed	Moving	N/A	12/13/2021	16:00 - Sunset	Wet
N/A	1	781	F	Adult	Berthille	32.2	30.1	31.4	Open	N/A	Sunny	Partially Away From The Sun	Fully Exposed	Moving	N/A	12/13/2021	16:00 - Sunset	Wet
N/A	29	900	M	Adult	Polp	27.4	28.3	32.6	Open	N/A	Sunny	Partially Away From The Sun	Fully Exposed	Vigilant	N/A	12/14/2021	Sunrise - 10:00	Wet
N/A	81	900	M	Adult	Polp	27.4	28.3	32.6	Open	N/A	Sunny	Partially Away From The Sun	Fully Exposed	Moving	N/A	12/14/2021	Sunrise - 10:00	Wet
N/A	94	900	M	Adult	Polp	27.4	28.3	32.6	Road	N/A	Sunny	Partially Away From The Sun	Fully Exposed	Moving	N/A	12/14/2021	Sunrise - 10:00	Wet
N/A	48	900	M	Adult	Polp	27.4	28.3	32.6	Road	N/A	Sunny	Partially Away From The Sun	Partially Exposed	Moving	N/A	12/14/2021	Sunrise - 10:00	Wet
N/A	63	900	M	Adult	Polp	27.4	28.3	32.6	Road	N/A	Sunny	Towards The Sun	Partially Exposed	Moving	N/A	12/14/2021	Sunrise - 10:00	Wet
N/A	68	900	M	Adult	Polp	27.4	28.3	32.6	Closed	N/A	Sunny	Partially Away From The Sun	Fully Exposed	Moving	N/A	12/14/2021	Sunrise - 10:00	Wet
N/A	20	900	M	Adult	Polp	27.4	28.3	32.6	Open	N/A	Sunny	Partially Away From The Sun	Fully Exposed	Moving	N/A	12/14/2021	Sunrise - 10:00	Wet
N/A	62	900	M	Adult	Polp	27.4	28.3	32.6	Open	N/A	Sunny	Towards The Sun	Fully Exposed	Moving	N/A	12/14/2021	Sunrise - 10:00	Wet
N/A	65	900	M	Adult	Polp	27.4	28.3	32.6	Open	N/A	Sunny	Partially Away From The Sun	Fully Exposed	Foraging	Leaves	12/14/2021	Sunrise - 10:00	Wet
N/A	148	900	M	Adult	Polp	27.4	28.3	32.6	Open	N/A	Sunny	Directly Away From The Sun	Fully Exposed	Foraging	Leaves	12/14/2021	Sunrise - 10:00	Wet
N/A	70	900	M	Adult	Polp	27.4	28.3	32.6	Open	N/A	Sunny	Directly Away From The Sun	Fully Exposed	Vigilant	N/A	12/14/2021	Sunrise - 10:00	Wet
N/A	152	900	M	Adult	Polp	27.4	28.3	32.6	Open	N/A	Sunny	Partially Away From The Sun	Fully Exposed	Vigilant	N/A	12/14/2021	Sunrise - 10:00	Wet
N/A	741	900	F	Adult	Nala	27.4	28.3	32.6	Open	N/A	Sunny	Directly Away From The Sun	Fully Exposed	Vigilant	N/A	12/14/2021	Sunrise - 10:00	Wet
N/A	79	900	F	Adult	Nala	27.4	28.3	32.6	Open	N/A	Sunny	Directly Away From The Sun	Fully Exposed	Foraging	Leaves	12/14/2021	Sunrise - 10:00	Wet
N/A	80	900	F	Adult	Nala	27.4	28.3	32.6	Open	N/A	Sunny	Partially Away From The Sun	Fully Exposed	Foraging	Leaves	12/14/2021	Sunrise - 10:00	Wet
N/A	204	900	M	Adult	Lethabo	27.4	28.3	32.6	Open	N/A	Sunny	Directly Away From The Sun	Fully Exposed	Vigilant	N/A	12/14/2021	Sunrise - 10:00	Wet
N/A	108	900	M	Adult	Lethabo	27.4	28.3	32.6	Open	N/A	Cloudy	Directly Away From The Sun	Partially Exposed	Vigilant	N/A	12/14/2021	Sunrise - 10:00	Wet
N/A	21	900	M	Adult	Lethabo	27.4	28.3	32.6	Open	N/A	Cloudy	Towards The Sun	Partially Exposed	Foraging	Leaves	12/14/2021	Sunrise - 10:00	Wet
N/A	17	900	M	Adult	Lethabo	27.4	28.3	32.6	Open	N/A	Cloudy	Towards The Sun	Partially Exposed	Moving	N/A	12/14/2021	Sunrise - 10:00	Wet
N/A	197	900	M	Adult	Lethabo	27.4	28.3	32.6	Open	N/A	Cloudy	Towards The Sun	Partially Exposed	Foraging	Leaves	12/14/2021	Sunrise - 10:00	Wet
N/A	28	900	M	Adult	Lethabo	27.4	28.3	32.6	Open	N/A	Cloudy	Partially Away From The Sun	Partially Exposed	Foraging	Leaves	12/14/2021	Sunrise - 10:00	Wet
N/A	47	900	M	Adult	Lethabo	27.4	28.3	32.6	Open	N/A	Cloudy	Towards The Sun	Partially Exposed	Foraging	Leaves	12/14/2021	Sunrise - 10:00	Wet
N/A	266	900	M	Adult	Lethabo	27.4	28.3	32.6	Open	N/A	Cloudy	Partially Away From The Sun	Partially Exposed	Foraging	Leaves	12/14/2021	Sunrise - 10:00	Wet
N/A	62	900	M	Adult	Lethabo	27.4	28.3	32.6	Open	N/A	Cloudy	Directly Away From The Sun	Partially Exposed	Foraging	Leaves	12/14/2021	Sunrise - 10:00	Wet
N/A	34	900	F	Sub-Adult	Walter	27.4	28.3	32.6	Open	N/A	Cloudy	Directly Away From The Sun	Partially Exposed	Foraging	Leaves	12/14/2021	Sunrise - 10:00	Wet
N/A	16	900	F	Sub-Adult	Walter	27.4	28.3	32.6	Open	N/A	Cloudy	Directly Away From The Sun	Partially Exposed	Vigilant	N/A	12/14/2021	Sunrise - 10:00	Wet
N/A	29	900	F	Sub-Adult	Walter	27.4	28.3	32.6	Open	N/A	Cloudy	Directly Away From The Sun	Partially Exposed	Foraging	Leaves	12/14/2021	Sunrise - 10:00	Wet
N/A	10	900	F	Sub-Adult	Walter	27.4	28.3	32.6	Open	N/A	Cloudy	Directly Away From The Sun	Partially Exposed	Vigilant	N/A	12/14/2021	Sunrise - 10:00	Wet
N/A	75	900	F	Sub-Adult	Walter	27.4	28.3	32.6	Open	N/A	Cloudy	Directly Away From The Sun	Partially Exposed	Foraging	Leaves	12/14/2021	Sunrise - 10:00	Wet
N/A	126	900	F	Sub-Adult	Walter	27.4	28.3	32.6	Open	N/A	Cloudy	Directly Away From The Sun	Partially Exposed	Vigilant	N/A	12/14/2021	Sunrise - 10:00	Wet
N/A	10	900	F	Sub-Adult	Walter	27.4	28.3	32.6	Open	N/A	Cloudy	Directly Away From The Sun	Partially Exposed	Foraging	Leaves	12/14/2021	Sunrise - 10:00	Wet
N/A	60	900	F	Sub-Adult	Walter	27.4	28.3	32.6	Open	N/A	Cloudy	Directly Away From The Sun	Partially Exposed	Vigilant	N/A	12/14/2021	Sunrise - 10:00	Wet
N/A	188	900	F	Sub-Adult	Walter	27.4	28.3	32.6	Open	N/A	Cloudy	Towards The Sun	Partially Exposed	Vigilant	N/A	12/14/2021	Sunrise - 10:00	Wet
N/A	127	900	F	Sub-Adult	Walter	27.4	28.3	32.6	Open	N/A	Cloudy	Towards The Sun	Partially Exposed	Foraging	Leaves	12/14/2021	Sunrise - 10:00	Wet
N/A	104	900	F	Sub-Adult	Walter	27.4	28.3	32.6	Open	N/A	Sunny	Partially Away From The Sun	Fully Exposed	Vigilant	N/A	12/14/2021	Sunrise - 10:00	Wet
N/A	54	900	F	Sub-Adult	Walter	27.4	28.3	32.6	Open	N/A	Sunny	Towards The Sun	Fully Exposed	Vigilant	N/A	12/14/2021	Sunrise - 10:00	Wet
N/A	8	900	F	Sub-Adult	Walter	27.4	28.3	32.6	Open	N/A	Sunny	Towards The Sun	Fully Exposed	Moving	N/A	12/14/2021	Sunrise - 10:00	Wet
N/A	59	900	F	Sub-Adult	Walter	27.4	28.3	32.6	Open	N/A	Sunny	Directly Away From The Sun	Fully Exposed	Vigilant	N/A	12/14/2021	Sunrise - 10:00	Wet
N/A	244	900	F	Adult	Kagiso	27.4	28.3	32.6	Open	N/A	Sunny	Directly Away From The Sun	Fully Exposed	Vigilant	N/A	12/14/2021	Sunrise - 10:00	Wet
N/A	70	900	F	Adult	Kagiso	27.4	28.3	32.6	Open	N/A	Sunny	Partially Away From The Sun	Fully Exposed	Vigilant	N/A	12/14/2021	Sunrise - 10:00	Wet
N/A	79	900	F	Adult	Kagiso	27.4	28.3	32.6	Open	N/A	Sunny	Towards The Sun	Fully Exposed	Vigilant	N/A	12/14/2021	Sunrise - 10:00	Wet
N/A	4	900	F	Adult	Kagiso	27.4	28.3	32.6	Open	N/A	Sunny	Towards The Sun	Fully Exposed	Moving	N/A	12/14/2021	Sunrise - 10:00	Wet
N/A	32	900	F	Adult	Kagiso	27.4	28.3	32.6	Open	N/A	Sunny	Towards The Sun	Fully Exposed	Vigilant	N/A	12/14/2021	Sunrise - 10:00	Wet
N/A	16	900	F	Adult	Kagiso	27.4	28.3	32.6	Open	N/A	Sunny	Partially Away From The Sun	Fully Exposed	Moving	N/A	12/14/2021	Sunrise - 10:00	Wet
N/A	38	900	F	Adult	Kagiso	27.4	28.3	32.6	Open	N/A	Sunny	Partially Away From The Sun	Fully Exposed	Foraging	Leaves	12/14/2021	Sunrise - 10:00	Wet
N/A	67	900	F	Adult	Kagiso	27.4	28.3	32.6	Open	N/A	Sunny	Directly Away From The Sun	Fully Exposed	Foraging	Leaves	12/14/2021	Sunrise - 10:00	Wet
N/A	70	900	F	Adult	Kagiso	27.4	28.3	32.6	Open	N/A	Sunny	Towards The Sun	No Exposure	Foraging	Leaves	12/14/2021	Sunrise - 10:00	Wet
N/A	146	900	F	Adult	Kagiso	27.4	28.3	32.6	Open	N/A	Sunny	Directly Away From The Sun	No Exposure	Vigilant	N/A	12/14/2021	Sunrise - 10:00	Wet
N/A	42	900	F	Adult	Kagiso	27.4	28.3	32.6	Road	N/A	Sunny	Towards The Sun	Partially Exposed	Foraging	Leaves	12/14/2021	Sunrise - 10:00	Wet
N/A	92	900	F	Adult	Kagiso	27.4	28.3	32.6	Road	N/A	Sunny	Partially Away From The Sun	No Exposure	Foraging	Leaves	12/14/2021	Sunrise - 10:00	Wet
N/A	45	900	F	Adult	Flower	27.4	28.3	32.6	Road	N/A	Sunny	Directly Away From The Sun	Fully Exposed	Foraging	Leaves	12/14/2021	Sunrise - 10:00	Wet
N/A	86	900	F	Adult	Flower	27.4	28.3	32.6	Road	N/A	Sunny	Partially Away From The Sun	No Exposure	Vigilant	N/A	12/14/2021	Sunrise - 10:00	Wet
N/A	769	900	F	Adult	Flower	27.4	28.3	32.6	Road	N/A	Sunny	Towards The Sun	No Exposure	Foraging	Leaves	12/14/2021	Sunrise - 10:00	Wet
N/A	57	900	M	Adult	McFly	29.2	33.6	34.2	Closed	N/A	Sunny	Directly Away From The Sun	No Exposure	Foraging	Leaves	12/15/2021	12:00 - 14:00	Wet
N/A	265	900	M	Adult	McFly	29.2	33.6	34.2	Closed	N/A	Sunny	Partially Away From The Sun	No Exposure	Foraging	Leaves	12/15/2021	12:00 - 14:00	Wet
N/A	26	900	M	Adult	McFly	29.2	33.6	34.2	Closed	N/A	Sunny	Towards The Sun	Partially Exposed	Foraging	Leaves	12/15/2021	12:00 - 14:00	Wet
N/A	52	900	M	Adult	McFly	29.2	33.6	34.2	Closed	N/A	Sunny	Directly Away From The Sun	Partially Exposed	Vigilant	N/A	12/15/2021	12:00 - 14:00	Wet
N/A	61	900	M	Adult	McFly	29.2	33.6	34.2	Closed	N/A	Sunny	Towards The Sun	Fully Exposed	Moving	N/A	12/15/2021	12:00 - 14:00	Wet
N/A	48	900	M	Adult	McFly	29.2	33.6	34.2	Road	N/A	Sunny	Partially Away From The Sun	Fully Exposed	Foraging	Leaves	12/15/2021	12:00 - 14:00	Wet
N/A	148	900	M	Adult	McFly	29.2	33.6	34.2	Road	N/A	Sunny	Partially Away From The Sun	Partially Exposed	Foraging	Leaves	12/15/2021	12:00 - 14:00	Wet
N/A	107	900	M	Adult	McFly	29.2	33.6	34.2	Road	N/A	Sunny	Directly Away From The Sun	No Exposure	Foraging	Leaves	12/15/2021	12:00 - 14:00	Wet
N/A	136	900	M	Adult	McFly	29.2	33.6	34.2	Road	N/A	Sunny	Partially Away From The Sun	Partially Exposed	Foraging	Leaves	12/15/2021	12:00 - 14:00	Wet
N/A	70	900	M	Adult	Lovely	29.2	33.6	34.2	Closed	N/A	Sunny	Partially Away From The Sun	Partially Exposed	Foraging	Leaves	12/15/2021	12:00 - 14:00	Wet
N/A	85	900	M	Adult	Lovely	29.2	33.6	34.2	Closed	N/A	Cloudy	Partially Away From The Sun	Cloudy Day	Foraging	Leaves	12/15/2021	12:00 - 14:00	Wet
N/A	44	900	M	Adult	Lovely	29.2	33.6	34.2	Closed	N/A	Sunny	Partially Away From The Sun	Fully Exposed	Foraging	Leaves	12/15/2021	12:00 - 14:00	Wet
N/A	52	900	M	Adult	Lovely	29.2	33.6	34.2	Closed	N/A	Cloudy	Partially Away From The Sun	Partially Exposed	Foraging	Leaves	12/15/2021	12:00 - 14:00	Wet
N/A	127	900	M	Adult	Lovely	29.2	33.6	34.2	Closed	N/A	Cloudy	Directly Away From The Sun	Cloudy Day	Foraging	Leaves	12/15/2021	12:00 - 14:00	Wet
N/A	26	900	M	Adult	Lovely	29.2	33.6	34.2	Closed	N/A	Sunny	Partially Away From The Sun	Partially Exposed	Moving	N/A	12/15/2021	12:00 - 14:00	Wet
N/A	143	900	M	Adult	Lovely	29.2	33.6	34.2	Closed	N/A	Sunny	Directly Away From The Sun	Partially Exposed	Foraging	Leaves	12/15/2021	12:00 - 14:00	Wet
N/A	103	900	M	Adult	Lovely	29.2	33.6	34.2	Road	N/A	Sunny	Partially Away From The Sun	No Exposure	Vigilant	N/A	12/15/2021	12:00 - 14:00	Wet
N/A	121	900	M	Adult	Lovely	29.2	33.6	34.2	Road	N/A	Sunny	Towards The Sun	Partially Exposed	Vigilant	N/A	12/15/2021	12:00 - 14:00	Wet
N/A	49	900	M	Adult	Lovely	29.2	33.6	34.2	Road	N/A	Sunny	Partially Away From The Sun	Partially Exposed	Foraging	Leaves	12/15/2021	12:00 - 14:00	Wet
N/A	78	900	M	Adult	Vejay	32.3	30.3	34.2	Road	N/A	Cloudy	Partially Away From The Sun	Partially Exposed	Vigilant	Leaves	12/15/2021	16:00 - Sunset	Wet
N/A	569	900	M	Adult	Vejay	32.3	30.3	34.2	Road	N/A	Cloudy	Towards The Sun	Partially Exposed	Vigilant	Leaves	12/15/2021	16:00 - Sunset	Wet
N/A	7	900	M	Adult	Vejay	32.3	30.3	34.2	Road	N/A	Cloudy	Partially Away From The Sun	Partially Exposed	Moving	Leaves	12/15/2021	16:00 - Sunset	Wet
N/A	79	900	M	Adult	Vejay	32.3	30.3	34.2	Road	N/A	Cloudy	Towards The Sun	Partially Exposed	Vigilant	Leaves	12/15/2021	16:00 - Sunset	Wet
N/A	22	900	M	Adult	Vejay	32.3	30.3	34.2	Road	N/A	Cloudy	Directly Away From The Sun	Partially Exposed	Vigilant	Leaves	12/15/2021	16:00 - Sunset	Wet
N/A	13	900	M	Adult	Vejay	32.3	30.3	34.2	Road	N/A	Cloudy	Towards The Sun	Partially Exposed	Vigilant	Leaves	12/15/2021	16:00 - Sunset	Wet
N/A	13	900	M	Adult	Vejay	32.3	30.3	34.2	Road	N/A	Cloudy	Partially Away From The Sun	Partially Exposed	Moving	Leaves	12/15/2021	16:00 - Sunset	Wet
N/A	68	900	M	Adult	Vejay	32.3	30.3	34.2	Road	N/A	Cloudy	Partially Away From The Sun	Partially Exposed	Vigilant	Leaves	12/15/2021	16:00 - Sunset	Wet
N/A	49	900	M	Adult	Vejay	32.3	30.3	34.2	Closed	N/A	Cloudy	Directly Away From The Sun	Partially Exposed	Interacting	Leaves	12/15/2021	16:00 - Sunset	Wet
N/A	39	375	F	Adult	Sahara	32.3	30.3	34.2	Closed	N/A	Cloudy	Partially Away From The Sun	Cloudy Day	Moving	N/A	12/15/2021	16:00 - Sunset	Wet
N/A	23	375	F	Adult	Sahara	32.3	30.3	34.2	Closed	N/A	Cloudy	Partially Away From The Sun	Cloudy Day	Vigilant	N/A	12/15/2021	16:00 - Sunset	Wet
N/A	28	375	F	Adult	Sahara	32.3	30.3	34.2	Closed	N/A	Cloudy	Directly Away From The Sun	Cloudy Day	Moving	N/A	12/15/2021	16:00 - Sunset	Wet
N/A	31	375	F	Adult	Sahara	32.3	30.3	34.2	Closed	N/A	Cloudy	Partially Away From The Sun	Cloudy Day	Vigilant	N/A	12/15/2021	16:00 - Sunset	Wet
N/A	15	375	F	Adult	Sahara	32.3	30.3	34.2	Closed	N/A	Cloudy	Partially Away From The Sun	Cloudy Day	Moving	N/A	12/15/2021	16:00 - Sunset	Wet
N/A	196	375	F	Adult	Sahara	32.3	30.3	34.2	Closed	N/A	Cloudy	Partially Away From The Sun	Cloudy Day	Vigilant	N/A	12/15/2021	16:00 - Sunset	Wet
N/A	43	375	F	Adult	Sahara	32.3	30.3	34.2	Closed	N/A	Cloudy	Partially Away From The Sun	Cloudy Day	Moving	N/A	12/15/2021	16:00 - Sunset	Wet
N/A	143	716	M	Adult	Vejay	32.3	30.3	34.2	Closed	N/A	Cloudy	Towards The Sun	Partially Exposed	Vigilant	N/A	12/15/2021	16:00 - Sunset	Wet
N/A	55	716	M	Adult	Vejay	32.3	30.3	34.2	Closed	N/A	Cloudy	Partially Away From The Sun	Partially Exposed	Moving	N/A	12/15/2021	16:00 - Sunset	Wet
N/A	75	716	M	Adult	Vejay	32.3	30.3	34.2	Closed	N/A	Cloudy	Partially Away From The Sun	Partially Exposed	Vigilant	N/A	12/15/2021	16:00 - Sunset	Wet
N/A	13	716	M	Adult	Vejay	32.3	30.3	34.2	Closed	N/A	Cloudy	Partially Away From The Sun	Partially Exposed	Moving	N/A	12/15/2021	16:00 - Sunset	Wet
N/A	6	716	M	Adult	Vejay	32.3	30.3	34.2	Closed	N/A	Cloudy	Towards The Sun	Partially Exposed	Vigilant	N/A	12/15/2021	16:00 - Sunset	Wet
N/A	24	716	M	Adult	Vejay	32.3	30.3	34.2	Closed	N/A	Cloudy	Partially Away From The Sun	Partially Exposed	Moving	N/A	12/15/2021	16:00 - Sunset	Wet
N/A	134	716	M	Adult	Vejay	32.3	30.3	34.2	Closed	N/A	Cloudy	Towards The Sun	Partially Exposed	Vigilant	N/A	12/15/2021	16:00 - Sunset	Wet
N/A	4	716	M	Adult	Vejay	32.3	30.3	34.2	Closed	N/A	Sunny	Partially Away From The Sun	Fully Exposed	Vigilant	N/A	12/15/2021	16:00 - Sunset	Wet
N/A	117	716	M	Adult	Vejay	32.3	30.3	34.2	Closed	N/A	Sunny	Partially Away From The Sun	Fully Exposed	Moving	N/A	12/15/2021	16:00 - Sunset	Wet
N/A	147	716	M	Adult	Vejay	32.3	30.3	34.2	Closed	N/A	Sunny	Towards The Sun	Fully Exposed	Vigilant	N/A	12/15/2021	16:00 - Sunset	Wet
N/A	81	711	F	Adult	Noumea	32.3	30.3	34.2	Road	N/A	Cloudy	Towards The Sun	Partially Exposed	Vigilant	N/A	12/15/2021	16:00 - Sunset	Wet
N/A	141	711	F	Adult	Noumea	32.3	30.3	34.2	Road	N/A	Sunny	Towards The Sun	Fully Exposed	Vigilant	N/A	12/15/2021	16:00 - Sunset	Wet
N/A	15	711	F	Adult	Noumea	32.3	30.3	34.2	Road	N/A	Sunny	Partially Away From The Sun	No Exposure	Moving	N/A	12/15/2021	16:00 - Sunset	Wet
N/A	159	711	F	Adult	Noumea	32.3	30.3	34.2	Road	N/A	Sunny	Partially Away From The Sun	No Exposure	Vigilant	N/A	12/15/2021	16:00 - Sunset	Wet
N/A	43	711	F	Adult	Noumea	32.3	30.3	34.2	Road	N/A	Sunny	Partially Away From The Sun	Fully Exposed	Moving	N/A	12/15/2021	16:00 - Sunset	Wet
N/A	21	711	F	Adult	Noumea	32.3	30.3	34.2	Road	N/A	Sunny	Directly Away From The Sun	Fully Exposed	Vigilant	N/A	12/15/2021	16:00 - Sunset	Wet
N/A	19	711	F	Adult	Noumea	32.3	30.3	34.2	Road	N/A	Sunny	Towards The Sun	Fully Exposed	Foraging	Leaves	12/15/2021	16:00 - Sunset	Wet
N/A	34	711	F	Adult	Noumea	32.3	30.3	34.2	Road	N/A	Sunny	Partially Away From The Sun	Fully Exposed	Moving	N/A	12/15/2021	16:00 - Sunset	Wet
N/A	31	711	F	Adult	Noumea	32.3	30.3	34.2	Road	N/A	Sunny	Directly Away From The Sun	Fully Exposed	Vigilant	N/A	12/15/2021	16:00 - Sunset	Wet
N/A	25	711	F	Adult	Noumea	32.3	30.3	34.2	Closed	N/A	Sunny	Partially Away From The Sun	Fully Exposed	Moving	N/A	12/15/2021	16:00 - Sunset	Wet
N/A	152	711	F	Adult	Noumea	32.3	30.3	34.2	Closed	N/A	Sunny	Towards The Sun	Fully Exposed	Foraging	Leaves	12/15/2021	16:00 - Sunset	Wet
N/A	234	342	M	Juvenile	Nairobi	32.3	30.3	34.2	Road	N/A	Sunny	Towards The Sun	Fully Exposed	Vigilant	N/A	12/15/2021	16:00 - Sunset	Wet
N/A	108	342	M	Juvenile	Nairobi	32.3	30.3	34.2	Road	N/A	Sunny	Directly Away From The Sun	Fully Exposed	Vigilant	N/A	12/15/2021	16:00 - Sunset	Wet
N/A	53	900	M	Adult	Charlie	24.8	26.3	34.2	Closed	N/A	Sunny	Directly Away From The Sun	Fully Exposed	Vigilant	N/A	12/16/2021	Sunrise - 10:00	Wet
N/A	9	900	M	Adult	Charlie	24.8	26.3	34.2	Closed	N/A	Sunny	Partially Away From The Sun	Fully Exposed	Moving	N/A	12/16/2021	Sunrise - 10:00	Wet
N/A	12	900	M	Adult	Charlie	24.8	26.3	34.2	Closed	N/A	Sunny	Directly Away From The Sun	Fully Exposed	Vigilant	N/A	12/16/2021	Sunrise - 10:00	Wet
N/A	43	900	M	Adult	Charlie	24.8	26.3	34.2	Closed	N/A	Sunny	Towards The Sun	Fully Exposed	Vigilant	N/A	12/16/2021	Sunrise - 10:00	Wet
N/A	90	900	M	Adult	Charlie	24.8	26.3	34.2	Closed	N/A	Sunny	Towards The Sun	Fully Exposed	Foraging	Leaves	12/16/2021	Sunrise - 10:00	Wet
N/A	61	900	M	Adult	Charlie	24.8	26.3	34.2	Closed	N/A	Sunny	Partially Away From The Sun	Fully Exposed	Foraging	Leaves	12/16/2021	Sunrise - 10:00	Wet
N/A	189	900	M	Adult	Charlie	24.8	26.3	34.2	Closed	N/A	Sunny	Directly Away From The Sun	Fully Exposed	Foraging	Leaves	12/16/2021	Sunrise - 10:00	Wet
N/A	23	900	M	Adult	Charlie	24.8	26.3	34.2	Closed	N/A	Sunny	Partially Away From The Sun	Fully Exposed	Interacting	N/A	12/16/2021	Sunrise - 10:00	Wet
N/A	102	900	M	Adult	Charlie	24.8	26.3	34.2	Closed	N/A	Sunny	Towards The Sun	Fully Exposed	Foraging	Leaves	12/16/2021	Sunrise - 10:00	Wet
N/A	103	900	M	Adult	Charlie	24.8	26.3	34.2	Closed	N/A	Cloudy	Towards The Sun	Cloudy Day	Foraging	Leaves	12/16/2021	Sunrise - 10:00	Wet
N/A	32	900	M	Adult	Charlie	24.8	26.3	34.2	Closed	N/A	Cloudy	Towards The Sun	Cloudy Day	Vigilant	N/A	12/16/2021	Sunrise - 10:00	Wet
N/A	24	900	M	Adult	Charlie	24.8	26.3	34.2	Closed	N/A	Cloudy	Partially Away From The Sun	Cloudy Day	Moving	N/A	12/16/2021	Sunrise - 10:00	Wet
N/A	159	900	M	Adult	Charlie	24.8	26.3	34.2	Closed	N/A	Cloudy	Partially Away From The Sun	Cloudy Day	Vigilant	N/A	12/16/2021	Sunrise - 10:00	Wet
N/A	100	675	F	Adult	Shadow	24.8	26.3	34.2	Closed	N/A	Overcast	Partially Away From The Sun	Cloudy Day	Vigilant	N/A	12/16/2021	Sunrise - 10:00	Wet
N/A	39	675	F	Adult	Shadow	24.8	26.3	34.2	Closed	N/A	Overcast	Towards The Sun	Cloudy Day	Moving	N/A	12/16/2021	Sunrise - 10:00	Wet
N/A	49	675	F	Adult	Shadow	24.8	26.3	34.2	Closed	N/A	Overcast	Directly Away From The Sun	Cloudy Day	Vigilant	N/A	12/16/2021	Sunrise - 10:00	Wet
N/A	23	675	F	Adult	Shadow	24.8	26.3	34.2	Closed	N/A	Overcast	Directly Away From The Sun	Cloudy Day	Foraging	Leaves	12/16/2021	Sunrise - 10:00	Wet
N/A	20	675	F	Adult	Shadow	24.8	26.3	34.2	Closed	N/A	Overcast	N/A	Cloudy Day	Moving	N/A	12/16/2021	Sunrise - 10:00	Wet
N/A	30	675	F	Adult	Shadow	24.8	26.3	34.2	Closed	N/A	Overcast	N/A	Cloudy Day	Vigilant	N/A	12/16/2021	Sunrise - 10:00	Wet
N/A	208	675	F	Adult	Shadow	24.8	26.3	34.2	Closed	N/A	Overcast	N/A	Cloudy Day	Foraging	Leaves	12/16/2021	Sunrise - 10:00	Wet
N/A	30	675	F	Adult	Shadow	24.8	26.3	34.2	Closed	N/A	Overcast	N/A	Cloudy Day	Moving	N/A	12/16/2021	Sunrise - 10:00	Wet
N/A	107	675	F	Adult	Shadow	24.8	26.3	34.2	Closed	N/A	Overcast	N/A	Cloudy Day	Foraging	Leaves	12/16/2021	Sunrise - 10:00	Wet
N/A	69	675	F	Adult	Shadow	24.8	26.3	34.2	Closed	N/A	Overcast	N/A	Cloudy Day	Moving	N/A	12/16/2021	Sunrise - 10:00	Wet
N/A	271	900	M	Adult	Sun	24.8	26.3	34.2	Closed	N/A	Overcast	N/A	Cloudy Day	Interacting	N/A	12/16/2021	Sunrise - 10:00	Wet
N/A	195	900	M	Adult	Sun	24.8	26.3	34.2	Closed	N/A	Overcast	N/A	Cloudy Day	Foraging	Leaves	12/16/2021	Sunrise - 10:00	Wet
N/A	95	900	M	Adult	Sun	24.8	26.3	34.2	Closed	N/A	Overcast	N/A	Cloudy Day	Moving	N/A	12/16/2021	Sunrise - 10:00	Wet
N/A	45	900	M	Adult	Sun	24.8	26.3	34.2	Closed	N/A	Overcast	N/A	Cloudy Day	Vigilant	N/A	12/16/2021	Sunrise - 10:00	Wet
N/A	107	900	M	Adult	Sun	24.8	26.3	34.2	Closed	N/A	Overcast	N/A	Cloudy Day	Moving	N/A	12/16/2021	Sunrise - 10:00	Wet
N/A	28	900	M	Adult	Sun	24.8	26.3	34.2	Closed	N/A	Overcast	N/A	Cloudy Day	Vigilant	N/A	12/16/2021	Sunrise - 10:00	Wet
N/A	47	900	M	Adult	Sun	24.8	26.3	34.2	Closed	N/A	Overcast	N/A	Cloudy Day	Interacting	N/A	12/16/2021	Sunrise - 10:00	Wet
N/A	19	900	M	Adult	Sun	24.8	26.3	34.2	Closed	N/A	Overcast	N/A	Cloudy Day	Foraging	Leaves	12/16/2021	Sunrise - 10:00	Wet
N/A	93	900	M	Adult	Sun	24.8	26.3	34.2	Closed	N/A	Overcast	N/A	Cloudy Day	Interacting	N/A	12/16/2021	Sunrise - 10:00	Wet
N/A	900	900	F	Adult	Madame Butterfly	24.8	26.3	34.2	Closed	N/A	Rainy	N/A	Cloudy Day	Foraging	Leaves	12/16/2021	Sunrise - 10:00	Wet
N/A	692	900	F	Adult	Flower	24.8	26.3	34.2	Closed	N/A	Rainy	N/A	Cloudy Day	Foraging	Leaves	12/16/2021	Sunrise - 10:00	Wet
N/A	208	900	F	Adult	Flower	24.8	26.3	34.2	Closed	N/A	Rainy	N/A	Cloudy Day	Vigilant	N/A	12/16/2021	Sunrise - 10:00	Wet
N/A	15	900	F	Adult	Noumea	19.3	22.9	29.1	Open	N/A	Cloudy	Towards The Sun	Cloudy Day	Vigilant	N/A	12/20/2021	Sunrise - 10:00	Wet
N/A	30	900	F	Adult	Noumea	19.3	22.9	29.1	Open	N/A	Cloudy	Towards The Sun	Cloudy Day	Moving	N/A	12/20/2021	Sunrise - 10:00	Wet
N/A	77	900	F	Adult	Noumea	19.3	22.9	29.1	Open	N/A	Cloudy	Partially Away From The Sun	Cloudy Day	Vigilant	N/A	12/20/2021	Sunrise - 10:00	Wet
N/A	164	900	F	Adult	Noumea	19.3	22.9	29.1	Open	N/A	Cloudy	Directly Away From The Sun	Cloudy Day	Vigilant	N/A	12/20/2021	Sunrise - 10:00	Wet
N/A	19	900	F	Adult	Noumea	19.3	22.9	29.1	Open	N/A	Cloudy	Partially Away From The Sun	Cloudy Day	Vigilant	N/A	12/20/2021	Sunrise - 10:00	Wet
N/A	90	900	F	Adult	Noumea	19.3	22.9	29.1	Open	N/A	Cloudy	Directly Away From The Sun	Cloudy Day	Vigilant	N/A	12/20/2021	Sunrise - 10:00	Wet
N/A	40	900	F	Adult	Noumea	19.3	22.9	29.1	Open	N/A	Cloudy	Partially Away From The Sun	Cloudy Day	Vigilant	N/A	12/20/2021	Sunrise - 10:00	Wet
N/A	207	900	F	Adult	Noumea	19.3	22.9	29.1	Open	N/A	Cloudy	Towards The Sun	Cloudy Day	Foraging	Leaves	12/20/2021	Sunrise - 10:00	Wet
N/A	258	900	F	Adult	Noumea	19.3	22.9	29.1	Open	N/A	Cloudy	Partially Away From The Sun	Cloudy Day	Foraging	Leaves	12/20/2021	Sunrise - 10:00	Wet
N/A	98	900	M	Juvenile	Nairobi	19.3	22.9	29.1	Open	N/A	Overcast	Towards The Sun	Cloudy Day	Foraging	Leaves	12/20/2021	Sunrise - 10:00	Wet
N/A	10	900	M	Juvenile	Nairobi	19.3	22.9	29.1	Open	N/A	Overcast	Directly Away From The Sun	Cloudy Day	Vigilant	N/A	12/20/2021	Sunrise - 10:00	Wet
N/A	51	900	M	Juvenile	Nairobi	19.3	22.9	29.1	Open	N/A	Overcast	Partially Away From The Sun	Cloudy Day	Vigilant	N/A	12/20/2021	Sunrise - 10:00	Wet
N/A	412	900	M	Juvenile	Nairobi	19.3	22.9	29.1	Open	N/A	Overcast	Towards The Sun	Cloudy Day	Vigilant	N/A	12/20/2021	Sunrise - 10:00	Wet
N/A	329	900	M	Juvenile	Nairobi	19.3	22.9	29.1	Open	N/A	Overcast	Partially Away From The Sun	Cloudy Day	Vigilant	N/A	12/20/2021	Sunrise - 10:00	Wet
N/A	186	900	M	Juvenile	Banana	19.3	22.9	29.1	Open	N/A	Overcast	Partially Away From The Sun	Cloudy Day	Foraging	Leaves	12/20/2021	Sunrise - 10:00	Wet
N/A	165	900	M	Juvenile	Banana	19.3	22.9	29.1	Open	N/A	Overcast	Towards The Sun	Cloudy Day	Vigilant	N/A	12/20/2021	Sunrise - 10:00	Wet
N/A	62	900	M	Juvenile	Banana	19.3	22.9	29.1	Open	N/A	Overcast	Partially Away From The Sun	Cloudy Day	Vigilant	N/A	12/20/2021	Sunrise - 10:00	Wet
N/A	68	900	M	Juvenile	Banana	19.3	22.9	29.1	Open	N/A	Overcast	Towards The Sun	Cloudy Day	Foraging	Leaves	12/20/2021	Sunrise - 10:00	Wet
N/A	164	900	M	Juvenile	Banana	19.3	22.9	29.1	Open	N/A	Overcast	Partially Away From The Sun	Cloudy Day	Foraging	Leaves	12/20/2021	Sunrise - 10:00	Wet
N/A	65	900	M	Juvenile	Banana	19.3	22.9	29.1	Open	N/A	Overcast	Towards The Sun	Cloudy Day	Foraging	Leaves	12/20/2021	Sunrise - 10:00	Wet
N/A	190	900	M	Juvenile	Banana	19.3	22.9	29.1	Open	N/A	Overcast	Partially Away From The Sun	Cloudy Day	Foraging	Leaves	12/20/2021	Sunrise - 10:00	Wet
N/A	57	900	F	Sub-Adult	Volley	19.3	22.9	29.1	Open	N/A	Overcast	Partially Away From The Sun	Cloudy Day	Foraging	Leaves	12/20/2021	Sunrise - 10:00	Wet
N/A	345	900	F	Sub-Adult	Volley	19.3	22.9	29.1	Open	N/A	Overcast	Partially Away From The Sun	Cloudy Day	Vigilant	N/A	12/20/2021	Sunrise - 10:00	Wet
N/A	6	900	F	Sub-Adult	Volley	19.3	22.9	29.1	Open	N/A	Cloudy	Directly Away From The Sun	Cloudy Day	Moving	N/A	12/20/2021	Sunrise - 10:00	Wet
N/A	198	900	F	Sub-Adult	Volley	19.3	22.9	29.1	Open	N/A	Cloudy	Towards The Sun	Cloudy Day	Vigilant	N/A	12/20/2021	Sunrise - 10:00	Wet
N/A	23	900	F	Sub-Adult	Volley	19.3	22.9	29.1	Open	N/A	Cloudy	Directly Away From The Sun	Cloudy Day	Moving	N/A	12/20/2021	Sunrise - 10:00	Wet
N/A	67	900	F	Sub-Adult	Volley	19.3	22.9	29.1	Open	N/A	Cloudy	Directly Away From The Sun	Cloudy Day	Vigilant	N/A	12/20/2021	Sunrise - 10:00	Wet
N/A	42	900	F	Sub-Adult	Volley	19.3	22.9	29.1	Open	N/A	Cloudy	Towards The Sun	Cloudy Day	Vigilant	N/A	12/20/2021	Sunrise - 10:00	Wet
N/A	22	900	F	Sub-Adult	Volley	19.3	22.9	29.1	Open	N/A	Cloudy	Towards The Sun	Cloudy Day	Moving	N/A	12/20/2021	Sunrise - 10:00	Wet
N/A	140	900	F	Sub-Adult	Volley	19.3	22.9	29.1	Open	N/A	Cloudy	Towards The Sun	Cloudy Day	Vigilant	N/A	12/20/2021	Sunrise - 10:00	Wet
N/A	146	503	M	Sub-Adult	Meringue	25	28.3	29.5	Open	N/A	Cloudy	Directly Away From The Sun	Cloudy Day	Vigilant	N/A	12/21/2021	12:00 - 14:00	Wet
N/A	37	503	M	Sub-Adult	Meringue	25	28.3	29.5	Open	N/A	Sunny	Directly Away From The Sun	Fully Exposed	Interacting	N/A	12/21/2021	12:00 - 14:00	Wet
N/A	45	503	M	Sub-Adult	Meringue	25	28.3	29.5	Open	N/A	Sunny	Towards The Sun	Fully Exposed	Vigilant	N/A	12/21/2021	12:00 - 14:00	Wet
N/A	118	503	M	Sub-Adult	Meringue	25	28.3	29.5	Open	N/A	Cloudy	Partially Away From The Sun	Cloudy Day	Vigilant	N/A	12/21/2021	12:00 - 14:00	Wet
N/A	10	503	M	Sub-Adult	Meringue	25	28.3	29.5	Open	N/A	Cloudy	Directly Away From The Sun	Cloudy Day	Moving	N/A	12/21/2021	12:00 - 14:00	Wet
N/A	15	503	M	Sub-Adult	Meringue	25	28.3	29.5	Open	N/A	Cloudy	Directly Away From The Sun	Cloudy Day	Vigilant	N/A	12/21/2021	12:00 - 14:00	Wet
N/A	63	503	M	Sub-Adult	Meringue	25	28.3	29.5	Open	N/A	Cloudy	Towards The Sun	Cloudy Day	Vigilant	N/A	12/21/2021	12:00 - 14:00	Wet
N/A	69	503	M	Sub-Adult	Meringue	25	28.3	29.5	Open	N/A	Cloudy	Partially Away From The Sun	Cloudy Day	Moving	N/A	12/21/2021	12:00 - 14:00	Wet
N/A	48	869	M	Sub-Adult	Meringue	25	28.3	29.5	Road	N/A	Cloudy	Directly Away From The Sun	Cloudy Day	Moving	N/A	12/21/2021	12:00 - 14:00	Wet
N/A	47	869	M	Sub-Adult	Meringue	25	28.3	29.5	Road	N/A	Cloudy	Partially Away From The Sun	Cloudy Day	Moving	N/A	12/21/2021	12:00 - 14:00	Wet
N/A	67	869	M	Sub-Adult	Meringue	25	28.3	29.5	Road	N/A	Cloudy	Partially Away From The Sun	Cloudy Day	Vigilant	N/A	12/21/2021	12:00 - 14:00	Wet
N/A	7	869	M	Sub-Adult	Meringue	25	28.3	29.5	Road	N/A	Cloudy	Towards The Sun	Cloudy Day	Moving	N/A	12/21/2021	12:00 - 14:00	Wet
N/A	43	869	M	Sub-Adult	Meringue	25	28.3	29.5	Road	N/A	Cloudy	Towards The Sun	Cloudy Day	Vigilant	N/A	12/21/2021	12:00 - 14:00	Wet
N/A	201	869	M	Sub-Adult	Meringue	25	28.3	29.5	Road	N/A	Cloudy	Partially Away From The Sun	Cloudy Day	Interacting	N/A	12/21/2021	12:00 - 14:00	Wet
N/A	29	869	M	Sub-Adult	Meringue	25	28.3	29.5	Road	N/A	Cloudy	Towards The Sun	Cloudy Day	Moving	N/A	12/21/2021	12:00 - 14:00	Wet
N/A	55	869	M	Sub-Adult	Meringue	25	28.3	29.5	Road	N/A	Cloudy	Towards The Sun	Cloudy Day	Interacting	N/A	12/21/2021	12:00 - 14:00	Wet
N/A	83	869	M	Sub-Adult	Meringue	25	28.3	29.5	Road	N/A	Cloudy	N/A	Cloudy Day	Foraging	Leaves	12/21/2021	12:00 - 14:00	Wet
N/A	63	869	M	Sub-Adult	Meringue	25	28.3	29.5	Road	N/A	Overcast	N/A	Cloudy Day	Moving	N/A	12/21/2021	12:00 - 14:00	Wet
N/A	170	869	M	Sub-Adult	Meringue	25	28.3	29.5	Road	N/A	Overcast	N/A	Cloudy Day	Vigilant	N/A	12/21/2021	12:00 - 14:00	Wet
N/A	56	869	M	Sub-Adult	Meringue	25	28.3	29.5	Road	N/A	Overcast	N/A	Cloudy Day	Moving	N/A	12/21/2021	12:00 - 14:00	Wet
N/A	50	595	M	Juvenile	Nairobi	25	28.3	29.5	Road	N/A	Overcast	N/A	Cloudy Day	Vigilant	N/A	12/21/2021	12:00 - 14:00	Wet
N/A	42	595	M	Juvenile	Nairobi	25	28.3	29.5	Road	N/A	Overcast	N/A	Cloudy Day	Moving	N/A	12/21/2021	12:00 - 14:00	Wet
N/A	18	595	M	Juvenile	Nairobi	25	28.3	29.5	Road	N/A	Overcast	N/A	Cloudy Day	Vigilant	N/A	12/21/2021	12:00 - 14:00	Wet
N/A	6	595	M	Juvenile	Nairobi	25	28.3	29.5	Road	N/A	Overcast	N/A	Cloudy Day	Moving	N/A	12/21/2021	12:00 - 14:00	Wet
N/A	35	595	M	Juvenile	Nairobi	25	28.3	29.5	Road	N/A	Overcast	N/A	Cloudy Day	Vigilant	N/A	12/21/2021	12:00 - 14:00	Wet
N/A	34	595	M	Juvenile	Nairobi	25	28.3	29.5	Road	N/A	Overcast	N/A	Cloudy Day	Moving	N/A	12/21/2021	12:00 - 14:00	Wet
N/A	58	595	M	Juvenile	Nairobi	25	28.3	29.5	Road	N/A	Overcast	N/A	Cloudy Day	Vigilant	N/A	12/21/2021	12:00 - 14:00	Wet
N/A	123	595	M	Juvenile	Nairobi	25	28.3	29.5	Road	N/A	Overcast	N/A	Cloudy Day	Interacting	N/A	12/21/2021	12:00 - 14:00	Wet
N/A	188	595	M	Juvenile	Nairobi	25	28.3	29.5	Road	N/A	Overcast	N/A	Cloudy Day	Vigilant	N/A	12/21/2021	12:00 - 14:00	Wet
N/A	41	595	M	Juvenile	Nairobi	25	28.3	29.5	Open	N/A	Cloudy	Directly Away From The Sun	Partially Exposed	Interacting	N/A	12/21/2021	12:00 - 14:00	Wet
N/A	14	174	M	Adult	Bunnychow	25	28.3	29.5	Road	N/A	Overcast	N/A	Cloudy Day	Moving	N/A	12/21/2021	12:00 - 14:00	Wet
N/A	160	174	M	Adult	Bunnychow	25	28.3	29.5	Road	N/A	Overcast	N/A	Cloudy Day	Vigilant	N/A	12/21/2021	12:00 - 14:00	Wet
N/A	411	900	M	Adult	Forest	25	28.3	29.5	Open	N/A	Overcast	N/A	Cloudy Day	Interacting	N/A	12/21/2021	12:00 - 14:00	Wet
N/A	54	900	M	Adult	Forest	25	28.3	29.5	Open	N/A	Cloudy	Towards The Sun	Partially Exposed	Vigilant	N/A	12/21/2021	12:00 - 14:00	Wet
N/A	86	900	M	Adult	Forest	25	28.3	29.5	Open	N/A	Overcast	N/A	Cloudy Day	Interacting	N/A	12/21/2021	12:00 - 14:00	Wet
N/A	108	900	M	Adult	Forest	25	28.3	29.5	Open	N/A	Sunny	Directly Away From The Sun	Fully Exposed	Vigilant	N/A	12/21/2021	12:00 - 14:00	Wet
N/A	80	900	M	Adult	Forest	25	28.3	29.5	Open	N/A	Cloudy	Towards The Sun	Partially Exposed	Vigilant	N/A	12/21/2021	12:00 - 14:00	Wet
N/A	161	900	M	Adult	Forest	25	28.3	29.5	Open	N/A	Cloudy	Directly Away From The Sun	Cloudy Day	Moving	N/A	12/21/2021	12:00 - 14:00	Wet
N/A	411	721	M	Sub-Adult	Skinny	25	28.3	29.5	Open	N/A	Overcast	N/A	Cloudy Day	Interacting	N/A	12/21/2021	12:00 - 14:00	Wet
N/A	54	721	M	Sub-Adult	Skinny	25	28.3	29.5	Open	N/A	Cloudy	Directly Away From The Sun	Partially Exposed	Vigilant	N/A	12/21/2021	12:00 - 14:00	Wet
N/A	86	721	M	Sub-Adult	Skinny	25	28.3	29.5	Open	N/A	Overcast	N/A	Cloudy Day	Interacting	N/A	12/21/2021	12:00 - 14:00	Wet
N/A	108	721	M	Sub-Adult	Skinny	25	28.3	29.5	Open	N/A	Sunny	Directly Away From The Sun	Fully Exposed	Vigilant	N/A	12/21/2021	12:00 - 14:00	Wet
N/A	62	721	M	Sub-Adult	Skinny	25	28.3	29.5	Open	N/A	Cloudy	Directly Away From The Sun	Partially Exposed	Foraging	Leaves	12/21/2021	12:00 - 14:00	Wet
N/A	14	900	M	Adult	Polp	25.2	29.1	30.4	Closed	N/A	Overcast	Directly Away From The Sun	Cloudy Day	Foraging	Leaves	12/27/2021	12:00 - 14:00	Wet
N/A	16	900	M	Adult	Polp	25.2	29.1	30.4	Closed	N/A	Overcast	N/A	Cloudy Day	Vigilant	N/A	12/27/2021	12:00 - 14:00	Wet
N/A	44	900	M	Adult	Polp	25.2	29.1	30.4	Closed	N/A	Overcast	N/A	Cloudy Day	Moving	N/A	12/27/2021	12:00 - 14:00	Wet
N/A	86	900	M	Adult	Polp	25.2	29.1	30.4	Closed	N/A	Overcast	N/A	Cloudy Day	Vigilant	N/A	12/27/2021	12:00 - 14:00	Wet
N/A	20	900	M	Adult	Polp	25.2	29.1	30.4	Closed	N/A	Overcast	N/A	Cloudy Day	Foraging	Leaves	12/27/2021	12:00 - 14:00	Wet
N/A	6	900	M	Adult	Polp	25.2	29.1	30.4	Closed	N/A	Overcast	N/A	Cloudy Day	Moving	N/A	12/27/2021	12:00 - 14:00	Wet
N/A	589	900	M	Adult	Polp	25.2	29.1	30.4	Closed	N/A	Overcast	N/A	Cloudy Day	Vigilant	N/A	12/27/2021	12:00 - 14:00	Wet
N/A	25	900	M	Adult	Polp	25.2	29.1	30.4	Closed	N/A	Overcast	N/A	Cloudy Day	Moving	N/A	12/27/2021	12:00 - 14:00	Wet
N/A	86	900	M	Adult	Polp	25.2	29.1	30.4	Closed	N/A	Overcast	N/A	Cloudy Day	Vigilant	N/A	12/27/2021	12:00 - 14:00	Wet
N/A	20	900	M	Adult	Polp	25.2	29.1	30.4	Closed	N/A	Overcast	N/A	Cloudy Day	Moving	N/A	12/27/2021	12:00 - 14:00	Wet
N/A	108	900	F	Adult	Noumea	29.2	32.7	35.3	Road	N/A	Sunny	Partially Away From The Sun	Fully Exposed	Vigilant	N/A	12/29/2021	12:00 - 14:00	Wet
N/A	21	900	F	Adult	Noumea	29.2	32.7	35.3	Closed	N/A	Sunny	Directly Away From The Sun	Fully Exposed	Vigilant	N/A	12/29/2021	12:00 - 14:00	Wet
N/A	102	900	F	Adult	Noumea	29.2	32.7	35.3	Closed	N/A	Sunny	Partially Away From The Sun	Fully Exposed	Vigilant	N/A	12/29/2021	12:00 - 14:00	Wet
N/A	5	900	F	Adult	Noumea	29.2	32.7	35.3	Closed	N/A	Sunny	Partially Away From The Sun	Fully Exposed	Foraging	Leaves	12/29/2021	12:00 - 14:00	Wet
N/A	43	900	F	Adult	Noumea	29.2	32.7	35.3	Closed	N/A	Sunny	Directly Away From The Sun	Fully Exposed	Vigilant	N/A	12/29/2021	12:00 - 14:00	Wet
N/A	154	900	F	Adult	Noumea	29.2	32.7	35.3	Closed	N/A	Sunny	Partially Away From The Sun	Fully Exposed	Vigilant	N/A	12/29/2021	12:00 - 14:00	Wet
N/A	19	900	F	Adult	Noumea	29.2	32.7	35.3	Closed	N/A	Sunny	Partially Away From The Sun	Fully Exposed	Moving	N/A	12/29/2021	12:00 - 14:00	Wet
N/A	8	900	F	Adult	Noumea	29.2	32.7	35.3	Closed	N/A	Sunny	Towards The Sun	Fully Exposed	Moving	N/A	12/29/2021	12:00 - 14:00	Wet
N/A	35	900	F	Adult	Noumea	29.2	32.7	35.3	Closed	N/A	Sunny	Towards The Sun	Fully Exposed	Vigilant	N/A	12/29/2021	12:00 - 14:00	Wet
N/A	23	900	F	Adult	Noumea	29.2	32.7	35.3	Closed	N/A	Sunny	Partially Away From The Sun	Fully Exposed	Moving	N/A	12/29/2021	12:00 - 14:00	Wet
N/A	125	900	F	Adult	Noumea	29.2	32.7	35.3	Closed	N/A	Sunny	Towards The Sun	Fully Exposed	Vigilant	N/A	12/29/2021	12:00 - 14:00	Wet
N/A	30	900	F	Adult	Noumea	29.2	32.7	35.3	Closed	N/A	Sunny	Towards The Sun	Fully Exposed	Moving	N/A	12/29/2021	12:00 - 14:00	Wet
N/A	96	900	F	Adult	Noumea	29.2	32.7	35.3	Closed	N/A	Sunny	Towards The Sun	Fully Exposed	Vigilant	N/A	12/29/2021	12:00 - 14:00	Wet
N/A	45	900	F	Adult	Noumea	29.2	32.7	35.3	Closed	N/A	Sunny	Towards The Sun	Fully Exposed	Foraging	Leaves	12/29/2021	12:00 - 14:00	Wet
N/A	23	900	F	Adult	Noumea	29.2	32.7	35.3	Closed	N/A	Sunny	Towards The Sun	Fully Exposed	Vigilant	N/A	12/29/2021	12:00 - 14:00	Wet
N/A	63	900	F	Adult	Noumea	29.2	32.7	35.3	Closed	N/A	Sunny	Partially Away From The Sun	Fully Exposed	Moving	N/A	12/29/2021	12:00 - 14:00	Wet
N/A	104	900	M	Adult	Melman	29.2	32.7	35.3	Road	N/A	Sunny	Partially Away From The Sun	Partially Exposed	Vigilant	N/A	12/29/2021	12:00 - 14:00	Wet
N/A	33	900	M	Adult	Melman	29.2	32.7	35.3	Closed	N/A	Sunny	Partially Away From The Sun	Fully Exposed	Moving	N/A	12/29/2021	12:00 - 14:00	Wet
N/A	301	900	M	Adult	Melman	29.2	32.7	35.3	Closed	N/A	Sunny	Partially Away From The Sun	Fully Exposed	Vigilant	N/A	12/29/2021	12:00 - 14:00	Wet
N/A	17	900	M	Adult	Melman	29.2	32.7	35.3	Closed	N/A	Sunny	Directly Away From The Sun	Fully Exposed	Moving	N/A	12/29/2021	12:00 - 14:00	Wet
N/A	13	900	M	Adult	Melman	29.2	32.7	35.3	Closed	N/A	Sunny	Partially Away From The Sun	Fully Exposed	Vigilant	N/A	12/29/2021	12:00 - 14:00	Wet
N/A	432	900	M	Adult	Melman	29.2	32.7	35.3	Closed	N/A	Sunny	Towards The Sun	Fully Exposed	Vigilant	N/A	12/29/2021	12:00 - 14:00	Wet
N/A	76	900	M	Adult	Aquarius	29.2	32.7	35.3	Open	N/A	Overcast	N/A	Cloudy Day	Moving	N/A	12/29/2021	12:00 - 14:00	Wet
N/A	307	900	M	Adult	Aquarius	29.2	32.7	35.3	Open	N/A	Overcast	N/A	Cloudy Day	Foraging	Leaves	12/29/2021	12:00 - 14:00	Wet
N/A	6	900	M	Adult	Aquarius	29.2	32.7	35.3	Open	N/A	Overcast	N/A	Cloudy Day	Moving	N/A	12/29/2021	12:00 - 14:00	Wet
N/A	277	900	M	Adult	Aquarius	29.2	32.7	35.3	Open	N/A	Overcast	N/A	Cloudy Day	Foraging	Leaves	12/29/2021	12:00 - 14:00	Wet
N/A	21	900	M	Adult	Aquarius	29.2	32.7	35.3	Open	N/A	Overcast	N/A	Cloudy Day	Moving	N/A	12/29/2021	12:00 - 14:00	Wet
N/A	61	900	M	Adult	Aquarius	29.2	32.7	35.3	Open	N/A	Overcast	N/A	Cloudy Day	Foraging	Leaves	12/29/2021	12:00 - 14:00	Wet
N/A	64	900	M	Adult	Aquarius	29.2	32.7	35.3	Open	N/A	Overcast	N/A	Cloudy Day	Moving	N/A	12/29/2021	12:00 - 14:00	Wet
N/A	88	900	M	Adult	Aquarius	29.2	32.7	35.3	Open	N/A	Overcast	N/A	Cloudy Day	Foraging	Leaves	12/29/2021	12:00 - 14:00	Wet
N/A	11	579	M	Adult	Melman	34	35.8	35.8	Road	N/A	Sunny	Directly Away From The Sun	Fully Exposed	Moving	N/A	12/30/2021	16:00 - Sunset	Wet
N/A	113	579	M	Adult	Melman	34	35.8	35.8	Road	N/A	Sunny	Partially Away From The Sun	Fully Exposed	Vigilant	N/A	12/30/2021	16:00 - Sunset	Wet
N/A	17	579	M	Adult	Melman	34	35.8	35.8	Closed	N/A	Sunny	Towards The Sun	Fully Exposed	Vigilant	N/A	12/30/2021	16:00 - Sunset	Wet
N/A	18	579	M	Adult	Melman	34	35.8	35.8	Closed	N/A	Sunny	Directly Away From The Sun	Fully Exposed	Moving	N/A	12/30/2021	16:00 - Sunset	Wet
N/A	26	579	M	Adult	Melman	34	35.8	35.8	Closed	N/A	Sunny	Partially Away From The Sun	Fully Exposed	Vigilant	N/A	12/30/2021	16:00 - Sunset	Wet
N/A	30	579	M	Adult	Melman	34	35.8	35.8	Closed	N/A	Sunny	Towards The Sun	Fully Exposed	Moving	N/A	12/30/2021	16:00 - Sunset	Wet
N/A	39	579	M	Adult	Melman	34	35.8	35.8	Closed	N/A	Sunny	Towards The Sun	Fully Exposed	Vigilant	N/A	12/30/2021	16:00 - Sunset	Wet
N/A	20	579	M	Adult	Melman	34	35.8	35.8	Closed	N/A	Sunny	Towards The Sun	Fully Exposed	Moving	N/A	12/30/2021	16:00 - Sunset	Wet
N/A	123	579	M	Adult	Melman	34	35.8	35.8	Closed	N/A	Sunny	Towards The Sun	Fully Exposed	Vigilant	N/A	12/30/2021	16:00 - Sunset	Wet
N/A	36	579	M	Adult	Melman	34	35.8	35.8	Closed	N/A	Sunny	Directly Away From The Sun	Fully Exposed	Moving	N/A	12/30/2021	16:00 - Sunset	Wet
N/A	32	579	M	Adult	Melman	34	35.8	35.8	Closed	N/A	Sunny	Directly Away From The Sun	Fully Exposed	Moving	N/A	12/30/2021	16:00 - Sunset	Wet
N/A	17	579	M	Adult	Melman	34	35.8	35.8	Closed	N/A	Sunny	Directly Away From The Sun	Fully Exposed	Moving	N/A	12/30/2021	16:00 - Sunset	Wet
N/A	33	579	M	Adult	Melman	34	35.8	35.8	Closed	N/A	Sunny	Directly Away From The Sun	Fully Exposed	Moving	N/A	12/30/2021	16:00 - Sunset	Wet
N/A	64	579	M	Adult	Melman	34	35.8	35.8	Closed	N/A	Sunny	Towards The Sun	No Exposure	Vigilant	N/A	12/30/2021	16:00 - Sunset	Wet
N/A	32	288	M	Adult	Sun	34	35.8	35.8	Closed	N/A	Sunny	Towards The Sun	Fully Exposed	Moving	N/A	12/30/2021	16:00 - Sunset	Wet
N/A	109	288	M	Adult	Sun	34	35.8	35.8	Closed	N/A	Sunny	Towards The Sun	No Exposure	Foraging	Leaves	12/30/2021	16:00 - Sunset	Wet
N/A	22	288	M	Adult	Sun	34	35.8	35.8	Closed	N/A	Sunny	Partially Away From The Sun	Partially Exposed	Foraging	Leaves	12/30/2021	16:00 - Sunset	Wet
N/A	17	288	M	Adult	Sun	34	35.8	35.8	Closed	N/A	Sunny	Towards The Sun	Fully Exposed	Moving	N/A	12/30/2021	16:00 - Sunset	Wet
N/A	118	288	M	Adult	Sun	34	35.8	35.8	Closed	N/A	Sunny	Partially Away From The Sun	Fully Exposed	Foraging	Leaves	12/30/2021	16:00 - Sunset	Wet
N/A	80	159	M	Juvenile	Kaleb	28.1	32.1	33.5	Road	N/A	Sunny	Partially Away From The Sun	Fully Exposed	Vigilant	N/A	2022-03-01	12:00 - 14:00	Wet
N/A	5	159	M	Juvenile	Kaleb	28.1	32.1	33.5	Road	N/A	Sunny	Directly Away From The Sun	Fully Exposed	Moving	N/A	2022-03-01	12:00 - 14:00	Wet
N/A	51	159	M	Juvenile	Kaleb	28.1	32.1	33.5	Road	N/A	Sunny	Partially Away From The Sun	Fully Exposed	Vigilant	N/A	2022-03-01	12:00 - 14:00	Wet
N/A	23	159	M	Juvenile	Kaleb	28.1	32.1	33.5	Road	N/A	Sunny	Partially Away From The Sun	Fully Exposed	Moving	N/A	2022-03-01	12:00 - 14:00	Wet
N/A	24	900	M	Adult	Dark Male	28.1	32.1	33.5	Open	N/A	Cloudy	Partially Away From The Sun	Cloudy Day	Vigilant	N/A	2022-03-01	12:00 - 14:00	Wet
N/A	125	900	M	Adult	Dark Male	28.1	32.1	33.5	Open	N/A	Cloudy	Partially Away From The Sun	Cloudy Day	Moving	N/A	2022-03-01	12:00 - 14:00	Wet
N/A	106	900	M	Adult	Dark Male	28.1	32.1	33.5	Open	N/A	Overcast	Partially Away From The Sun	Cloudy Day	Drinking	N/A	2022-03-01	12:00 - 14:00	Wet
N/A	120	900	M	Adult	Dark Male	28.1	32.1	33.5	Open	N/A	Cloudy	Partially Away From The Sun	Cloudy Day	Vigilant	N/A	2022-03-01	12:00 - 14:00	Wet
N/A	27	900	M	Adult	Dark Male	28.1	32.1	33.5	Open	N/A	Sunny	Directly Away From The Sun	Fully Exposed	Moving	N/A	2022-03-01	12:00 - 14:00	Wet
N/A	24	900	M	Adult	Dark Male	28.1	32.1	33.5	Open	N/A	Sunny	Partially Away From The Sun	Fully Exposed	Moving	N/A	2022-03-01	12:00 - 14:00	Wet
N/A	42	900	M	Adult	Dark Male	28.1	32.1	33.5	Open	N/A	Sunny	Directly Away From The Sun	Fully Exposed	Vigilant	N/A	2022-03-01	12:00 - 14:00	Wet
N/A	29	900	M	Adult	Dark Male	28.1	32.1	33.5	Open	N/A	Sunny	Partially Away From The Sun	Fully Exposed	Moving	N/A	2022-03-01	12:00 - 14:00	Wet
N/A	82	900	M	Adult	Dark Male	28.1	32.1	33.5	Open	N/A	Sunny	Directly Away From The Sun	Fully Exposed	Moving	N/A	2022-03-01	12:00 - 14:00	Wet
N/A	57	900	M	Adult	Dark Male	28.1	32.1	33.5	Open	N/A	Cloudy	Partially Away From The Sun	Cloudy Day	Vigilant	N/A	2022-03-01	12:00 - 14:00	Wet
N/A	26	900	M	Adult	Dark Male	28.1	32.1	33.5	Open	N/A	Sunny	Towards The Sun	Fully Exposed	Moving	N/A	2022-03-01	12:00 - 14:00	Wet
N/A	26	900	M	Adult	Dark Male	28.1	32.1	33.5	Open	N/A	Sunny	Partially Away From The Sun	Fully Exposed	Interacting	N/A	2022-03-01	12:00 - 14:00	Wet
N/A	24	900	M	Adult	Dark Male	28.1	32.1	33.5	Open	N/A	Sunny	Directly Away From The Sun	Fully Exposed	Interacting	N/A	2022-03-01	12:00 - 14:00	Wet
N/A	66	900	M	Adult	Dark Male	28.1	32.1	33.5	Open	N/A	Sunny	Partially Away From The Sun	Fully Exposed	Vigilant	N/A	2022-03-01	12:00 - 14:00	Wet
N/A	46	900	M	Adult	Dark Male	28.1	32.1	33.5	Open	N/A	Sunny	Directly Away From The Sun	Fully Exposed	Vigilant	N/A	2022-03-01	12:00 - 14:00	Wet
N/A	76	900	M	Adult	Dark Male	28.1	32.1	33.5	Open	N/A	Sunny	Partially Away From The Sun	Fully Exposed	Foraging	Leaves	2022-03-01	12:00 - 14:00	Wet
N/A	67	900	F	Adult	Flower	33.5	31.3	33.5	Road	N/A	Cloudy	Partially Away From The Sun	Cloudy Day	Vigilant	N/A	2022-03-01	16:00 - Sunset	Wet
N/A	39	900	F	Adult	Flower	33.5	31.3	33.5	Road	N/A	Cloudy	Directly Away From The Sun	Partially Exposed	Moving	N/A	2022-03-01	16:00 - Sunset	Wet
N/A	87	900	F	Adult	Flower	33.5	31.3	33.5	Road	N/A	Cloudy	Directly Away From The Sun	Partially Exposed	Foraging	Leaves	2022-03-01	16:00 - Sunset	Wet
N/A	15	900	F	Adult	Flower	33.5	31.3	33.5	Road	N/A	Cloudy	Partially Away From The Sun	Cloudy Day	Moving	N/A	2022-03-01	16:00 - Sunset	Wet
N/A	297	900	F	Adult	Flower	33.5	31.3	33.5	Road	N/A	Cloudy	Partially Away From The Sun	Cloudy Day	Foraging	Leaves	2022-03-01	16:00 - Sunset	Wet
N/A	52	900	F	Adult	Flower	33.5	31.3	33.5	Road	N/A	Sunny	Directly Away From The Sun	Partially Exposed	Moving	N/A	2022-03-01	16:00 - Sunset	Wet
N/A	343	900	F	Adult	Flower	33.5	31.3	33.5	Road	N/A	Sunny	Partially Away From The Sun	Partially Exposed	Vigilant	N/A	2022-03-01	16:00 - Sunset	Wet
N/A	50	900	F	Adult	Madame Butterfly	33.5	31.3	33.5	Road	N/A	Cloudy	Partially Away From The Sun	Partially Exposed	Vigilant	N/A	2022-03-01	16:00 - Sunset	Wet
N/A	84	900	F	Adult	Madame Butterfly	33.5	31.3	33.5	Road	N/A	Cloudy	Partially Away From The Sun	Cloudy Day	Foraging	Salt	2022-03-01	16:00 - Sunset	Wet
N/A	355	900	F	Adult	Madame Butterfly	33.5	31.3	33.5	Road	N/A	Cloudy	Partially Away From The Sun	Cloudy Day	Vigilant	N/A	2022-03-01	16:00 - Sunset	Wet
N/A	205	900	F	Adult	Madame Butterfly	33.5	31.3	33.5	Road	N/A	Sunny	Partially Away From The Sun	Fully Exposed	Vigilant	N/A	2022-03-01	16:00 - Sunset	Wet
N/A	58	900	F	Adult	Madame Butterfly	33.5	31.3	33.5	Road	N/A	Sunny	Partially Away From The Sun	Fully Exposed	Foraging	Salt	2022-03-01	16:00 - Sunset	Wet
N/A	34	900	F	Adult	Madame Butterfly	33.5	31.3	33.5	Road	N/A	Sunny	Partially Away From The Sun	Fully Exposed	Moving	N/A	2022-03-01	16:00 - Sunset	Wet
N/A	26	900	F	Adult	Madame Butterfly	33.5	31.3	33.5	Road	N/A	Sunny	Partially Away From The Sun	Partially Exposed	Vigilant	N/A	2022-03-01	16:00 - Sunset	Wet
N/A	88	900	F	Adult	Madame Butterfly	33.5	31.3	33.5	Road	N/A	Sunny	Partially Away From The Sun	Partially Exposed	Foraging	Leaves	2022-03-01	16:00 - Sunset	Wet
N/A	45	900	F	Adult	Noumea	34.1	33.5	34.4	Open	N/A	Sunny	Directly Away From The Sun	Fully Exposed	Vigilant	N/A	2022-04-01	12:00 - 14:00	Wet
N/A	7	900	F	Adult	Noumea	34.1	33.5	34.4	Open	N/A	Sunny	Directly Away From The Sun	Fully Exposed	Moving	N/A	2022-04-01	12:00 - 14:00	Wet
N/A	22	900	F	Adult	Noumea	34.1	33.5	34.4	Open	N/A	Sunny	Directly Away From The Sun	Fully Exposed	Vigilant	N/A	2022-04-01	12:00 - 14:00	Wet
N/A	50	900	F	Adult	Noumea	34.1	33.5	34.4	Open	N/A	Sunny	Partially Away From The Sun	Fully Exposed	Vigilant	N/A	2022-04-01	12:00 - 14:00	Wet
N/A	36	900	F	Adult	Noumea	34.1	33.5	34.4	Open	N/A	Sunny	Directly Away From The Sun	Fully Exposed	Moving	N/A	2022-04-01	12:00 - 14:00	Wet
N/A	8	900	F	Adult	Noumea	34.1	33.5	34.4	Open	N/A	Sunny	Directly Away From The Sun	Fully Exposed	Vigilant	N/A	2022-04-01	12:00 - 14:00	Wet
N/A	42	900	F	Adult	Noumea	34.1	33.5	34.4	Open	N/A	Sunny	Directly Away From The Sun	Fully Exposed	Moving	N/A	2022-04-01	12:00 - 14:00	Wet
N/A	98	900	F	Adult	Noumea	34.1	33.5	34.4	Open	N/A	Sunny	Partially Away From The Sun	Fully Exposed	Vigilant	N/A	2022-04-01	12:00 - 14:00	Wet
N/A	19	900	F	Adult	Noumea	34.1	33.5	34.4	Open	N/A	Sunny	Directly Away From The Sun	Fully Exposed	Vigilant	N/A	2022-04-01	12:00 - 14:00	Wet
N/A	55	900	F	Adult	Noumea	34.1	33.5	34.4	Open	N/A	Sunny	Partially Away From The Sun	Fully Exposed	Moving	N/A	2022-04-01	12:00 - 14:00	Wet
N/A	19	900	F	Adult	Noumea	34.1	33.5	34.4	Open	N/A	Sunny	Partially Away From The Sun	Fully Exposed	Vigilant	N/A	2022-04-01	12:00 - 14:00	Wet
N/A	38	900	F	Adult	Noumea	34.1	33.5	34.4	Open	N/A	Sunny	Directly Away From The Sun	Fully Exposed	Moving	N/A	2022-04-01	12:00 - 14:00	Wet
N/A	101	900	F	Adult	Noumea	34.1	33.5	34.4	Open	N/A	Cloudy	Partially Away From The Sun	Partially Exposed	Foraging	Leaves	2022-04-01	12:00 - 14:00	Wet
N/A	50	900	F	Adult	Noumea	34.1	33.5	34.4	Open	N/A	Cloudy	Partially Away From The Sun	Partially Exposed	Moving	N/A	2022-04-01	12:00 - 14:00	Wet
N/A	250	900	F	Adult	Noumea	34.1	33.5	34.4	Open	N/A	Cloudy	Partially Away From The Sun	Partially Exposed	Foraging	Leaves	2022-04-01	12:00 - 14:00	Wet
N/A	67	635	M	Juvenile	Kaleb	30.1	34.4	36.5	Open	N/A	Sunny	Directly Away From The Sun	Fully Exposed	Moving	N/A	2022-05-01	12:00 - 14:00	Wet
N/A	25	635	M	Juvenile	Kaleb	30.1	34.4	36.5	Open	N/A	Sunny	Partially Away From The Sun	Fully Exposed	Vigilant	N/A	2022-05-01	12:00 - 14:00	Wet
N/A	14	635	M	Juvenile	Kaleb	30.1	34.4	36.5	Open	N/A	Sunny	Directly Away From The Sun	Fully Exposed	Vigilant	N/A	2022-05-01	12:00 - 14:00	Wet
N/A	63	635	M	Juvenile	Kaleb	30.1	34.4	36.5	Open	N/A	Sunny	Partially Away From The Sun	Fully Exposed	Vigilant	N/A	2022-05-01	12:00 - 14:00	Wet
N/A	35	635	M	Juvenile	Kaleb	30.1	34.4	36.5	Open	N/A	Sunny	Directly Away From The Sun	Fully Exposed	Moving	N/A	2022-05-01	12:00 - 14:00	Wet
N/A	31	635	M	Juvenile	Kaleb	30.1	34.4	36.5	Open	N/A	Sunny	Partially Away From The Sun	Fully Exposed	Vigilant	N/A	2022-05-01	12:00 - 14:00	Wet
N/A	39	635	M	Juvenile	Kaleb	30.1	34.4	36.5	Open	N/A	Sunny	Directly Away From The Sun	Partially Exposed	Moving	N/A	2022-05-01	12:00 - 14:00	Wet
N/A	48	635	M	Juvenile	Kaleb	30.1	34.4	36.5	Open	N/A	Sunny	Directly Away From The Sun	Partially Exposed	Vigilant	N/A	2022-05-01	12:00 - 14:00	Wet
N/A	6	635	M	Juvenile	Kaleb	30.1	34.4	36.5	Open	N/A	Sunny	Directly Away From The Sun	Fully Exposed	Moving	N/A	2022-05-01	12:00 - 14:00	Wet
N/A	105	635	M	Juvenile	Kaleb	30.1	34.4	36.5	Open	N/A	Sunny	Partially Away From The Sun	Fully Exposed	Vigilant	N/A	2022-05-01	12:00 - 14:00	Wet
N/A	13	635	M	Juvenile	Kaleb	30.1	34.4	36.5	Open	N/A	Sunny	Directly Away From The Sun	Fully Exposed	Vigilant	N/A	2022-05-01	12:00 - 14:00	Wet
N/A	28	635	M	Juvenile	Kaleb	30.1	34.4	36.5	Open	N/A	Sunny	Directly Away From The Sun	Fully Exposed	Moving	N/A	2022-05-01	12:00 - 14:00	Wet
N/A	15	635	M	Juvenile	Kaleb	30.1	34.4	36.5	Open	N/A	Sunny	Towards The Sun	Fully Exposed	Moving	N/A	2022-05-01	12:00 - 14:00	Wet
N/A	77	635	M	Juvenile	Kaleb	30.1	34.4	36.5	Open	N/A	Sunny	Directly Away From The Sun	Fully Exposed	Vigilant	N/A	2022-05-01	12:00 - 14:00	Wet
N/A	23	635	M	Juvenile	Kaleb	30.1	34.4	36.5	Open	N/A	Sunny	Directly Away From The Sun	Fully Exposed	Moving	N/A	2022-05-01	12:00 - 14:00	Wet
N/A	23	635	M	Juvenile	Kaleb	30.1	34.4	36.5	Open	N/A	Sunny	Partially Away From The Sun	Fully Exposed	Moving	N/A	2022-05-01	12:00 - 14:00	Wet
N/A	42	900	M	Adult	McFly	30.1	34.4	36.5	Open	N/A	Sunny	Towards The Sun	Fully Exposed	Vigilant	N/A	2022-05-01	12:00 - 14:00	Wet
N/A	41	900	M	Adult	McFly	30.1	34.4	36.5	Open	N/A	Sunny	Directly Away From The Sun	Fully Exposed	Moving	N/A	2022-05-01	12:00 - 14:00	Wet
N/A	7	900	M	Adult	McFly	30.1	34.4	36.5	Open	N/A	Sunny	Directly Away From The Sun	Fully Exposed	Vigilant	N/A	2022-05-01	12:00 - 14:00	Wet
N/A	34	900	M	Adult	McFly	30.1	34.4	36.5	Open	N/A	Sunny	Directly Away From The Sun	Partially Exposed	Moving	N/A	2022-05-01	12:00 - 14:00	Wet
N/A	7	900	M	Adult	McFly	30.1	34.4	36.5	Open	N/A	Sunny	Directly Away From The Sun	Partially Exposed	Vigilant	N/A	2022-05-01	12:00 - 14:00	Wet
N/A	42	900	M	Adult	McFly	30.1	34.4	36.5	Open	N/A	Sunny	Directly Away From The Sun	Fully Exposed	Moving	N/A	2022-05-01	12:00 - 14:00	Wet
N/A	68	900	M	Adult	McFly	30.1	34.4	36.5	Open	N/A	Sunny	Towards The Sun	Partially Exposed	Vigilant	N/A	2022-05-01	12:00 - 14:00	Wet
N/A	134	900	M	Adult	McFly	30.1	34.4	36.5	Open	N/A	Sunny	Directly Away From The Sun	Fully Exposed	Vigilant	N/A	2022-05-01	12:00 - 14:00	Wet
N/A	32	900	M	Adult	McFly	30.1	34.4	36.5	Open	N/A	Sunny	Directly Away From The Sun	Fully Exposed	Moving	N/A	2022-05-01	12:00 - 14:00	Wet
N/A	433	900	M	Adult	McFly	30.1	34.4	36.5	Open	N/A	Sunny	Directly Away From The Sun	Fully Exposed	Vigilant	N/A	2022-05-01	12:00 - 14:00	Wet
N/A	469	900	F	Adult	Berthille	25.9	28.7	36.2	Open	N/A	Cloudy	Partially Away From The Sun	Cloudy Day	Vigilant	N/A	2022-07-01	Sunrise - 10:00	Wet
N/A	131	900	F	Adult	Berthille	25.9	28.7	36.2	Open	N/A	Cloudy	Directly Away From The Sun	Cloudy Day	Vigilant	N/A	2022-07-01	Sunrise - 10:00	Wet
N/A	31	900	F	Adult	Berthille	25.9	28.7	36.2	Open	N/A	Cloudy	Partially Away From The Sun	Cloudy Day	Moving	N/A	2022-07-01	Sunrise - 10:00	Wet
N/A	141	900	F	Adult	Berthille	25.9	28.7	36.2	Open	N/A	Cloudy	Partially Away From The Sun	Cloudy Day	Foraging	Leaves	2022-07-01	Sunrise - 10:00	Wet
N/A	34	900	F	Adult	Berthille	25.9	28.7	36.2	Open	N/A	Cloudy	Towards The Sun	Partially Exposed	Moving	N/A	2022-07-01	Sunrise - 10:00	Wet
N/A	23	900	F	Adult	Berthille	25.9	28.7	36.2	Open	N/A	Cloudy	Partially Away From The Sun	Partially Exposed	Vigilant	N/A	2022-07-01	Sunrise - 10:00	Wet
N/A	43	900	F	Adult	Berthille	25.9	28.7	36.2	Open	N/A	Cloudy	Towards The Sun	Partially Exposed	Moving	N/A	2022-07-01	Sunrise - 10:00	Wet
N/A	28	900	F	Adult	Berthille	25.9	28.7	36.2	Open	N/A	Cloudy	Partially Away From The Sun	Partially Exposed	Vigilant	N/A	2022-07-01	Sunrise - 10:00	Wet
N/A	66	900	M	Adult	Dark Male	25.9	28.7	36.2	Road	N/A	Cloudy	Towards The Sun	Cloudy Day	Foraging	Leaves	2022-07-01	Sunrise - 10:00	Wet
N/A	32	900	M	Adult	Dark Male	25.9	28.7	36.2	Road	N/A	Cloudy	Partially Away From The Sun	Cloudy Day	Moving	N/A	2022-07-01	Sunrise - 10:00	Wet
N/A	284	900	M	Adult	Dark Male	25.9	28.7	36.2	Road	N/A	Cloudy	Towards The Sun	Cloudy Day	Foraging	Leaves	2022-07-01	Sunrise - 10:00	Wet
N/A	67	900	M	Adult	Dark Male	25.9	28.7	36.2	Road	N/A	Cloudy	Partially Away From The Sun	Cloudy Day	Foraging	Leaves	2022-07-01	Sunrise - 10:00	Wet
N/A	100	900	M	Adult	Dark Male	25.9	28.7	36.2	Road	N/A	Cloudy	Directly Away From The Sun	Cloudy Day	Foraging	Leaves	2022-07-01	Sunrise - 10:00	Wet
N/A	26	900	M	Adult	Dark Male	25.9	28.7	36.2	Road	N/A	Cloudy	Towards The Sun	Cloudy Day	Moving	N/A	2022-07-01	Sunrise - 10:00	Wet
N/A	127	900	M	Adult	Dark Male	25.9	28.7	36.2	Road	N/A	Cloudy	Towards The Sun	Cloudy Day	Drinking	N/A	2022-07-01	Sunrise - 10:00	Wet
N/A	76	900	M	Adult	Dark Male	25.9	28.7	36.2	Road	N/A	Cloudy	Partially Away From The Sun	Cloudy Day	Vigilant	N/A	2022-07-01	Sunrise - 10:00	Wet
N/A	122	900	M	Adult	Dark Male	25.9	28.7	36.2	Road	N/A	Cloudy	Partially Away From The Sun	Cloudy Day	Foraging	Leaves	2022-07-01	Sunrise - 10:00	Wet
N/A	132	682	M	Juvenile	Kaleb	29.2	31.7	32.5	Open	N/A	Sunny	Directly Away From The Sun	Fully Exposed	Inactive	N/A	2022-11-01	12:00 - 14:00	Wet
N/A	99	682	M	Juvenile	Kaleb	29.2	31.7	32.5	Open	N/A	Sunny	Towards The Sun	Fully Exposed	Vigilant	N/A	2022-11-01	12:00 - 14:00	Wet
N/A	17	682	M	Juvenile	Kaleb	29.2	31.7	32.5	Open	N/A	Sunny	Directly Away From The Sun	Partially Exposed	Moving	N/A	2022-11-01	12:00 - 14:00	Wet
N/A	33	682	M	Juvenile	Kaleb	29.2	31.7	32.5	Open	N/A	Cloudy	Directly Away From The Sun	Partially Exposed	Vigilant	N/A	2022-11-01	12:00 - 14:00	Wet
N/A	43	682	M	Juvenile	Kaleb	29.2	31.7	32.5	Open	N/A	Cloudy	Directly Away From The Sun	Partially Exposed	Moving	N/A	2022-11-01	12:00 - 14:00	Wet
N/A	47	682	M	Juvenile	Kaleb	29.2	31.7	32.5	Open	N/A	Cloudy	Directly Away From The Sun	Partially Exposed	Vigilant	N/A	2022-11-01	12:00 - 14:00	Wet
N/A	31	682	M	Juvenile	Kaleb	29.2	31.7	32.5	Open	N/A	Cloudy	Partially Away From The Sun	Fully Exposed	Moving	N/A	2022-11-01	12:00 - 14:00	Wet
N/A	46	682	M	Juvenile	Kaleb	29.2	31.7	32.5	Open	N/A	Sunny	Partially Away From The Sun	Fully Exposed	Vigilant	N/A	2022-11-01	12:00 - 14:00	Wet
N/A	18	682	M	Juvenile	Kaleb	29.2	31.7	32.5	Open	N/A	Sunny	Partially Away From The Sun	Partially Exposed	Moving	N/A	2022-11-01	12:00 - 14:00	Wet
N/A	9	682	M	Juvenile	Kaleb	29.2	31.7	32.5	Open	N/A	Cloudy	Directly Away From The Sun	Partially Exposed	Vigilant	N/A	2022-11-01	12:00 - 14:00	Wet
N/A	36	682	M	Juvenile	Kaleb	29.2	31.7	32.5	Open	N/A	Cloudy	Partially Away From The Sun	Partially Exposed	Moving	N/A	2022-11-01	12:00 - 14:00	Wet
N/A	31	682	M	Juvenile	Kaleb	29.2	31.7	32.5	Open	N/A	Cloudy	Directly Away From The Sun	Partially Exposed	Vigilant	N/A	2022-11-01	12:00 - 14:00	Wet
N/A	20	682	M	Juvenile	Kaleb	29.2	31.7	32.5	Open	N/A	Cloudy	Directly Away From The Sun	Partially Exposed	Moving	N/A	2022-11-01	12:00 - 14:00	Wet
N/A	26	682	M	Juvenile	Kaleb	29.2	31.7	32.5	Open	N/A	Cloudy	Directly Away From The Sun	Partially Exposed	Vigilant	N/A	2022-11-01	12:00 - 14:00	Wet
N/A	13	682	M	Juvenile	Kaleb	29.2	31.7	32.5	Open	N/A	Cloudy	Directly Away From The Sun	Partially Exposed	Moving	N/A	2022-11-01	12:00 - 14:00	Wet
N/A	76	682	M	Juvenile	Kaleb	29.2	31.7	32.5	Open	N/A	Cloudy	Partially Away From The Sun	Partially Exposed	Vigilant	N/A	2022-11-01	12:00 - 14:00	Wet
N/A	5	682	M	Juvenile	Kaleb	29.2	31.7	32.5	Open	N/A	Cloudy	Directly Away From The Sun	Partially Exposed	Moving	N/A	2022-11-01	12:00 - 14:00	Wet
N/A	150	900	M	Adult	Melman	29.2	31.7	32.5	Open	N/A	Sunny	Towards The Sun	No Exposure	Foraging	Leaves	2022-11-01	12:00 - 14:00	Wet
N/A	40	900	M	Adult	Melman	29.2	31.7	32.5	Open	N/A	Sunny	Directly Away From The Sun	Fully Exposed	Moving	N/A	2022-11-01	12:00 - 14:00	Wet
N/A	41	900	M	Adult	Melman	29.2	31.7	32.5	Road	N/A	Sunny	Partially Away From The Sun	Fully Exposed	Moving	N/A	2022-11-01	12:00 - 14:00	Wet
N/A	32	900	M	Adult	Melman	29.2	31.7	32.5	Open	N/A	Sunny	Directly Away From The Sun	Partially Exposed	Foraging	Leaves	2022-11-01	12:00 - 14:00	Wet
N/A	40	900	M	Adult	Melman	29.2	31.7	32.5	Open	N/A	Cloudy	Directly Away From The Sun	Cloudy Day	Vigilant	N/A	2022-11-01	12:00 - 14:00	Wet
N/A	45	900	M	Adult	Melman	29.2	31.7	32.5	Open	N/A	Cloudy	Partially Away From The Sun	Cloudy Day	Foraging	Leaves	2022-11-01	12:00 - 14:00	Wet
N/A	14	900	M	Adult	Melman	29.2	31.7	32.5	Open	N/A	Cloudy	Partially Away From The Sun	Fully Exposed	Moving	N/A	2022-11-01	12:00 - 14:00	Wet
N/A	156	900	M	Adult	Melman	29.2	31.7	32.5	Open	N/A	Cloudy	Directly Away From The Sun	Fully Exposed	Foraging	Leaves	2022-11-01	12:00 - 14:00	Wet
N/A	13	900	M	Adult	Melman	29.2	31.7	32.5	Open	N/A	Cloudy	Partially Away From The Sun	Cloudy Day	Moving	N/A	2022-11-01	12:00 - 14:00	Wet
N/A	369	900	M	Adult	Melman	29.2	31.7	32.5	Open	N/A	Cloudy	Directly Away From The Sun	Cloudy Day	Foraging	Leaves	2022-11-01	12:00 - 14:00	Wet
N/A	58	332	M	Adult	Lethabo	32.1	31.3	32.5	Road	N/A	Cloudy	Towards The Sun	Partially Exposed	Vigilant	N/A	2022-11-01	16:00 - Sunset	Wet
N/A	13	332	M	Adult	Lethabo	32.1	31.3	32.5	Road	N/A	Cloudy	Partially Away From The Sun	Partially Exposed	Moving	N/A	2022-11-01	16:00 - Sunset	Wet
N/A	51	332	M	Adult	Lethabo	32.1	31.3	32.5	Road	N/A	Cloudy	Partially Away From The Sun	Partially Exposed	Vigilant	N/A	2022-11-01	16:00 - Sunset	Wet
N/A	13	332	M	Adult	Lethabo	32.1	31.3	32.5	Road	N/A	Cloudy	Directly Away From The Sun	Partially Exposed	Moving	N/A	2022-11-01	16:00 - Sunset	Wet
N/A	20	332	M	Adult	Lethabo	32.1	31.3	32.5	Road	N/A	Cloudy	Directly Away From The Sun	Partially Exposed	Vigilant	N/A	2022-11-01	16:00 - Sunset	Wet
N/A	17	332	M	Adult	Lethabo	32.1	31.3	32.5	Road	N/A	Cloudy	Partially Away From The Sun	Partially Exposed	Moving	N/A	2022-11-01	16:00 - Sunset	Wet
N/A	18	332	M	Adult	Lethabo	32.1	31.3	32.5	Road	N/A	Cloudy	Partially Away From The Sun	Partially Exposed	Vigilant	N/A	2022-11-01	16:00 - Sunset	Wet
N/A	44	332	M	Adult	Lethabo	32.1	31.3	32.5	Road	N/A	Cloudy	Towards The Sun	Partially Exposed	Moving	N/A	2022-11-01	16:00 - Sunset	Wet
N/A	108	332	M	Adult	Lethabo	32.1	31.3	32.5	Road	N/A	Cloudy	Partially Away From The Sun	Partially Exposed	Vigilant	N/A	2022-11-01	16:00 - Sunset	Wet
N/A	93	580	F	Adult	Berthille	26.7	28.2	32.5	Road	N/A	Overcast	Partially Away From The Sun	Cloudy Day	Vigilant	N/A	2022-12-01	Sunrise - 10:00	Wet
N/A	336	580	F	Adult	Berthille	26.7	28.2	32.5	Road	N/A	Overcast	Partially Away From The Sun	Cloudy Day	Vigilant	N/A	2022-12-01	Sunrise - 10:00	Wet
N/A	151	580	F	Adult	Berthille	26.7	28.2	32.5	Road	N/A	Overcast	Directly Away From The Sun	Cloudy Day	Vigilant	N/A	2022-12-01	Sunrise - 10:00	Wet
N/A	32	355	M	Adult	Polp	26.7	28.2	32.5	Road	N/A	Overcast	N/A	Cloudy Day	Foraging	Leaves	2022-12-01	Sunrise - 10:00	Wet
N/A	5	355	M	Adult	Polp	26.7	28.2	32.5	Road	N/A	Overcast	N/A	Cloudy Day	Moving	N/A	2022-12-01	Sunrise - 10:00	Wet
N/A	135	355	M	Adult	Polp	26.7	28.2	32.5	Road	N/A	Overcast	N/A	Cloudy Day	Vigilant	N/A	2022-12-01	Sunrise - 10:00	Wet
N/A	12	355	M	Adult	Polp	26.7	28.2	32.5	Road	N/A	Overcast	N/A	Cloudy Day	Moving	N/A	2022-12-01	Sunrise - 10:00	Wet
N/A	171	355	M	Adult	Polp	26.7	28.2	32.5	Road	N/A	Overcast	N/A	Cloudy Day	Foraging	Leaves	2022-12-01	Sunrise - 10:00	Wet
N/A	56	900	M	Adult	Charlie	26.7	28.2	32.5	Open	N/A	Cloudy	Towards The Sun	Cloudy Day	Vigilant	Leaves	2022-12-01	Sunrise - 10:00	Wet
N/A	152	900	M	Adult	Charlie	26.7	28.2	32.5	Open	N/A	Cloudy	Partially Away From The Sun	Cloudy Day	Vigilant	Leaves	2022-12-01	Sunrise - 10:00	Wet
N/A	78	900	M	Adult	Charlie	26.7	28.2	32.5	Open	N/A	Overcast	Directly Away From The Sun	Cloudy Day	Vigilant	Leaves	2022-12-01	Sunrise - 10:00	Wet
N/A	31	900	M	Adult	Charlie	26.7	28.2	32.5	Open	N/A	Overcast	Partially Away From The Sun	Cloudy Day	Vigilant	Leaves	2022-12-01	Sunrise - 10:00	Wet
N/A	77	900	M	Adult	Charlie	26.7	28.2	32.5	Open	N/A	Overcast	Towards The Sun	Cloudy Day	Moving	Leaves	2022-12-01	Sunrise - 10:00	Wet
N/A	29	900	M	Adult	Charlie	26.7	28.2	32.5	Open	N/A	Overcast	Towards The Sun	Cloudy Day	Vigilant	Leaves	2022-12-01	Sunrise - 10:00	Wet
N/A	31	900	M	Adult	Charlie	26.7	28.2	32.5	Open	N/A	Overcast	Towards The Sun	Cloudy Day	Moving	Leaves	2022-12-01	Sunrise - 10:00	Wet
N/A	44	900	M	Adult	Charlie	26.7	28.2	32.5	Open	N/A	Overcast	Directly Away From The Sun	Cloudy Day	Vigilant	Leaves	2022-12-01	Sunrise - 10:00	Wet
N/A	28	900	M	Adult	Charlie	26.7	28.2	32.5	Open	N/A	Overcast	Directly Away From The Sun	Cloudy Day	Moving	Leaves	2022-12-01	Sunrise - 10:00	Wet
N/A	45	900	M	Adult	Charlie	26.7	28.2	32.5	Open	N/A	Overcast	Directly Away From The Sun	Cloudy Day	Vigilant	Leaves	2022-12-01	Sunrise - 10:00	Wet
N/A	110	900	M	Adult	Charlie	26.7	28.2	32.5	Open	N/A	Overcast	Partially Away From The Sun	Cloudy Day	Moving	Leaves	2022-12-01	Sunrise - 10:00	Wet
N/A	14	900	M	Adult	Charlie	26.7	28.2	32.5	Open	N/A	Overcast	Towards The Sun	Cloudy Day	Vigilant	Leaves	2022-12-01	Sunrise - 10:00	Wet
N/A	74	900	M	Adult	Charlie	26.7	28.2	32.5	Open	N/A	Overcast	Directly Away From The Sun	Cloudy Day	Moving	Leaves	2022-12-01	Sunrise - 10:00	Wet
N/A	15	900	M	Adult	Charlie	26.7	28.2	32.5	Open	N/A	Overcast	Directly Away From The Sun	Cloudy Day	Vigilant	Leaves	2022-12-01	Sunrise - 10:00	Wet
N/A	27	900	M	Adult	Charlie	26.7	28.2	32.5	Open	N/A	Overcast	Directly Away From The Sun	Cloudy Day	Moving	Leaves	2022-12-01	Sunrise - 10:00	Wet
N/A	19	900	M	Adult	Charlie	26.7	28.2	32.5	Open	N/A	Overcast	Partially Away From The Sun	Cloudy Day	Vigilant	Leaves	2022-12-01	Sunrise - 10:00	Wet
N/A	43	900	M	Adult	Charlie	26.7	28.2	32.5	Open	N/A	Overcast	Directly Away From The Sun	Cloudy Day	Moving	Leaves	2022-12-01	Sunrise - 10:00	Wet
N/A	27	900	M	Adult	Charlie	26.7	28.2	32.5	Open	N/A	Overcast	Directly Away From The Sun	Cloudy Day	Vigilant	Leaves	2022-12-01	Sunrise - 10:00	Wet
N/A	18	900	M	Adult	Aquarius	31.9	29.7	32.1	Road	N/A	Overcast	Towards The Sun	Cloudy Day	Moving	N/A	01/13/2022	16:00 - Sunset	Wet
N/A	42	900	M	Adult	Aquarius	31.9	29.7	32.1	Road	N/A	Overcast	Partially Away From The Sun	Cloudy Day	Vigilant	N/A	01/13/2022	16:00 - Sunset	Wet
N/A	20	900	M	Adult	Aquarius	31.9	29.7	32.1	Road	N/A	Overcast	Partially Away From The Sun	Cloudy Day	Moving	N/A	01/13/2022	16:00 - Sunset	Wet
N/A	60	900	M	Adult	Aquarius	31.9	29.7	32.1	Road	N/A	Overcast	Partially Away From The Sun	Cloudy Day	Vigilant	N/A	01/13/2022	16:00 - Sunset	Wet
N/A	20	900	M	Adult	Aquarius	31.9	29.7	32.1	Road	N/A	Overcast	Partially Away From The Sun	Cloudy Day	Moving	N/A	01/13/2022	16:00 - Sunset	Wet
N/A	24	900	M	Adult	Aquarius	31.9	29.7	32.1	Road	N/A	Overcast	Partially Away From The Sun	Cloudy Day	Vigilant	N/A	01/13/2022	16:00 - Sunset	Wet
N/A	23	900	M	Adult	Aquarius	31.9	29.7	32.1	Road	N/A	Overcast	Partially Away From The Sun	Cloudy Day	Moving	N/A	01/13/2022	16:00 - Sunset	Wet
N/A	12	900	M	Adult	Aquarius	31.9	29.7	32.1	Road	N/A	Overcast	Towards The Sun	Cloudy Day	Moving	N/A	01/13/2022	16:00 - Sunset	Wet
N/A	21	900	M	Adult	Aquarius	31.9	29.7	32.1	Road	N/A	Overcast	Partially Away From The Sun	Cloudy Day	Moving	N/A	01/13/2022	16:00 - Sunset	Wet
N/A	75	900	M	Adult	Aquarius	31.9	29.7	32.1	Road	N/A	Overcast	Towards The Sun	Cloudy Day	Moving	N/A	01/13/2022	16:00 - Sunset	Wet
N/A	61	900	M	Adult	Aquarius	31.9	29.7	32.1	Road	N/A	Overcast	Partially Away From The Sun	Cloudy Day	Moving	N/A	01/13/2022	16:00 - Sunset	Wet
N/A	27	900	M	Adult	Aquarius	31.9	29.7	32.1	Road	N/A	Overcast	Partially Away From The Sun	Cloudy Day	Vigilant	N/A	01/13/2022	16:00 - Sunset	Wet
N/A	15	900	M	Adult	Aquarius	31.9	29.7	32.1	Road	N/A	Overcast	Towards The Sun	Cloudy Day	Moving	N/A	01/13/2022	16:00 - Sunset	Wet
N/A	24	900	M	Adult	Aquarius	31.9	29.7	32.1	Road	N/A	Overcast	Towards The Sun	Cloudy Day	Vigilant	N/A	01/13/2022	16:00 - Sunset	Wet
N/A	22	900	M	Adult	Aquarius	31.9	29.7	32.1	Road	N/A	Overcast	Towards The Sun	Cloudy Day	Moving	N/A	01/13/2022	16:00 - Sunset	Wet
N/A	102	900	M	Adult	Aquarius	31.9	29.7	32.1	Road	N/A	Overcast	Towards The Sun	Cloudy Day	Vigilant	N/A	01/13/2022	16:00 - Sunset	Wet
N/A	12	900	M	Adult	Aquarius	31.9	29.7	32.1	Road	N/A	Overcast	Towards The Sun	Cloudy Day	Moving	N/A	01/13/2022	16:00 - Sunset	Wet
N/A	233	900	M	Adult	Aquarius	31.9	29.7	32.1	Road	N/A	Overcast	Towards The Sun	Cloudy Day	Vigilant	N/A	01/13/2022	16:00 - Sunset	Wet
N/A	40	900	M	Adult	Aquarius	31.9	29.7	32.1	Road	N/A	Overcast	Towards The Sun	Cloudy Day	Moving	N/A	01/13/2022	16:00 - Sunset	Wet
N/A	14	900	M	Adult	Aquarius	31.9	29.7	32.1	Road	N/A	Overcast	Towards The Sun	Cloudy Day	Vigilant	N/A	01/13/2022	16:00 - Sunset	Wet
N/A	35	900	M	Adult	Aquarius	31.9	29.7	32.1	Road	N/A	Overcast	Partially Away From The Sun	Cloudy Day	Moving	N/A	01/13/2022	16:00 - Sunset	Wet
N/A	152	692	M	Adult	Dark Male	26.1	28.6	31.5	Open	N/A	Sunny	Towards The Sun	Fully Exposed	Moving	N/A	01/14/2022	Sunrise - 10:00	Wet
N/A	21	692	M	Adult	Dark Male	26.1	28.6	31.5	Open	N/A	Sunny	Towards The Sun	Fully Exposed	Vigilant	N/A	01/14/2022	Sunrise - 10:00	Wet
N/A	141	692	M	Adult	Dark Male	26.1	28.6	31.5	Closed	N/A	Sunny	Towards The Sun	Fully Exposed	Moving	N/A	01/14/2022	Sunrise - 10:00	Wet
N/A	80	692	M	Adult	Dark Male	26.1	28.6	31.5	Closed	N/A	Sunny	Partially Away From The Sun	Fully Exposed	Foraging	Bone	01/14/2022	Sunrise - 10:00	Wet
N/A	16	692	M	Adult	Dark Male	26.1	28.6	31.5	Closed	N/A	Sunny	Partially Away From The Sun	Fully Exposed	Vigilant	N/A	01/14/2022	Sunrise - 10:00	Wet
N/A	48	692	M	Adult	Dark Male	26.1	28.6	31.5	Closed	N/A	Sunny	Partially Away From The Sun	Fully Exposed	Moving	N/A	01/14/2022	Sunrise - 10:00	Wet
N/A	16	692	M	Adult	Dark Male	26.1	28.6	31.5	Closed	N/A	Sunny	Partially Away From The Sun	Fully Exposed	Vigilant	N/A	01/14/2022	Sunrise - 10:00	Wet
N/A	44	692	M	Adult	Dark Male	26.1	28.6	31.5	Closed	N/A	Cloudy	Towards The Sun	Partially Exposed	Vigilant	N/A	01/14/2022	Sunrise - 10:00	Wet
N/A	28	692	M	Adult	Dark Male	26.1	28.6	31.5	Closed	N/A	Cloudy	Partially Away From The Sun	Partially Exposed	Moving	N/A	01/14/2022	Sunrise - 10:00	Wet
N/A	72	692	M	Adult	Dark Male	26.1	28.6	31.5	Closed	N/A	Sunny	Towards The Sun	Partially Exposed	Foraging	Leaves	01/14/2022	Sunrise - 10:00	Wet
N/A	36	692	M	Adult	Dark Male	26.1	28.6	31.5	Closed	N/A	Cloudy	Partially Away From The Sun	Partially Exposed	Foraging	Leaves	01/14/2022	Sunrise - 10:00	Wet
N/A	38	692	M	Adult	Dark Male	26.1	28.6	31.5	Closed	N/A	Cloudy	Partially Away From The Sun	Cloudy Day	Moving	Leaves	01/14/2022	Sunrise - 10:00	Wet
N/A	30	900	F	Adult	Madame Butterfly	25.2	27.8	31.8	Open	N/A	Overcast	Towards The Sun	Cloudy Day	Vigilant	N/A	01/17/2022	Sunrise - 10:00	Wet
N/A	601	900	F	Adult	Madame Butterfly	25.2	27.8	31.8	Open	N/A	Overcast	Directly Away From The Sun	Cloudy Day	Vigilant	N/A	01/17/2022	Sunrise - 10:00	Wet
N/A	21	900	F	Adult	Madame Butterfly	25.2	27.8	31.8	Open	N/A	Overcast	Partially Away From The Sun	Cloudy Day	Moving	N/A	01/17/2022	Sunrise - 10:00	Wet
N/A	248	900	F	Adult	Madame Butterfly	25.2	27.8	31.8	Open	N/A	Overcast	Directly Away From The Sun	Cloudy Day	Vigilant	N/A	01/17/2022	Sunrise - 10:00	Wet
N/A	20	900	F	Adult	Kagiso	25.2	27.8	31.8	Open	N/A	Cloudy	Partially Away From The Sun	Cloudy Day	Vigilant	N/A	01/17/2022	Sunrise - 10:00	Wet
N/A	6	900	F	Adult	Kagiso	25.2	27.8	31.8	Open	N/A	Cloudy	Directly Away From The Sun	Partially Exposed	Moving	N/A	01/17/2022	Sunrise - 10:00	Wet
N/A	10	900	F	Adult	Kagiso	25.2	27.8	31.8	Open	N/A	Cloudy	Partially Away From The Sun	Partially Exposed	Moving	N/A	01/17/2022	Sunrise - 10:00	Wet
N/A	73	900	F	Adult	Kagiso	25.2	27.8	31.8	Open	N/A	Cloudy	Directly Away From The Sun	Partially Exposed	Vigilant	N/A	01/17/2022	Sunrise - 10:00	Wet
N/A	115	900	F	Adult	Kagiso	25.2	27.8	31.8	Open	N/A	Cloudy	Directly Away From The Sun	Partially Exposed	Foraging	Leaves	01/17/2022	Sunrise - 10:00	Wet
N/A	8	900	F	Adult	Kagiso	25.2	27.8	31.8	Open	N/A	Cloudy	Towards The Sun	Partially Exposed	Vigilant	N/A	01/17/2022	Sunrise - 10:00	Wet
N/A	19	900	F	Adult	Kagiso	25.2	27.8	31.8	Open	N/A	Cloudy	Partially Away From The Sun	Fully Exposed	Moving	N/A	01/17/2022	Sunrise - 10:00	Wet
N/A	133	900	F	Adult	Kagiso	25.2	27.8	31.8	Open	N/A	Cloudy	Partially Away From The Sun	Cloudy Day	Foraging	Leaves	01/17/2022	Sunrise - 10:00	Wet
N/A	130	900	F	Adult	Kagiso	25.2	27.8	31.8	Open	N/A	Cloudy	Partially Away From The Sun	Cloudy Day	Vigilant	N/A	01/17/2022	Sunrise - 10:00	Wet
N/A	79	900	F	Adult	Kagiso	25.2	27.8	31.8	Open	N/A	Cloudy	Towards The Sun	Cloudy Day	Vigilant	N/A	01/17/2022	Sunrise - 10:00	Wet
N/A	307	900	F	Adult	Kagiso	25.2	27.8	31.8	Open	N/A	Cloudy	Partially Away From The Sun	Cloudy Day	Vigilant	N/A	01/17/2022	Sunrise - 10:00	Wet
N/A	38	487	F	Adult	Emma	29.2	30.5	31.8	Open	N/A	Cloudy	Partially Away From The Sun	Cloudy Day	Vigilant	N/A	01/17/2022	12:00 - 14:00	Wet
N/A	2	487	F	Adult	Emma	29.2	30.5	31.8	Open	N/A	Cloudy	Towards The Sun	Cloudy Day	Moving	N/A	01/17/2022	12:00 - 14:00	Wet
N/A	203	487	F	Adult	Emma	29.2	30.5	31.8	Open	N/A	Cloudy	Partially Away From The Sun	Cloudy Day	Foraging	Leaves	01/17/2022	12:00 - 14:00	Wet
N/A	4	487	F	Adult	Emma	29.2	30.5	31.8	Open	N/A	Cloudy	Directly Away From The Sun	Cloudy Day	Moving	N/A	01/17/2022	12:00 - 14:00	Wet
N/A	19	487	F	Adult	Emma	29.2	30.5	31.8	Open	N/A	Cloudy	Partially Away From The Sun	Cloudy Day	Moving	N/A	01/17/2022	12:00 - 14:00	Wet
N/A	34	487	F	Adult	Emma	29.2	30.5	31.8	Open	N/A	Cloudy	Towards The Sun	Cloudy Day	Vigilant	N/A	01/17/2022	12:00 - 14:00	Wet
N/A	80	487	F	Adult	Emma	29.2	30.5	31.8	Open	N/A	Cloudy	Partially Away From The Sun	Partially Exposed	Vigilant	N/A	01/17/2022	12:00 - 14:00	Wet
N/A	20	487	F	Adult	Emma	29.2	30.5	31.8	Open	N/A	Cloudy	Directly Away From The Sun	Cloudy Day	Moving	N/A	01/17/2022	12:00 - 14:00	Wet
N/A	87	487	F	Adult	Emma	29.2	30.5	31.8	Open	N/A	Cloudy	Partially Away From The Sun	Cloudy Day	Vigilant	N/A	01/17/2022	12:00 - 14:00	Wet
N/A	18	900	M	Adult	Aquarius	29.2	30.5	31.8	Open	N/A	Cloudy	Towards The Sun	Cloudy Day	Moving	N/A	01/17/2022	12:00 - 14:00	Wet
N/A	116	900	M	Adult	Aquarius	29.2	30.5	31.8	Open	N/A	Cloudy	Partially Away From The Sun	Cloudy Day	Vigilant	N/A	01/17/2022	12:00 - 14:00	Wet
N/A	115	900	M	Adult	Aquarius	29.2	30.5	31.8	Open	N/A	Sunny	Partially Away From The Sun	Fully Exposed	Drinking	N/A	01/17/2022	12:00 - 14:00	Wet
N/A	69	900	M	Adult	Aquarius	29.2	30.5	31.8	Open	N/A	Sunny	Towards The Sun	Fully Exposed	Vigilant	N/A	01/17/2022	12:00 - 14:00	Wet
N/A	27	900	M	Adult	Aquarius	29.2	30.5	31.8	Open	N/A	Sunny	Towards The Sun	Fully Exposed	Drinking	N/A	01/17/2022	12:00 - 14:00	Wet
N/A	166	900	M	Adult	Aquarius	29.2	30.5	31.8	Open	N/A	Sunny	Partially Away From The Sun	Fully Exposed	Vigilant	N/A	01/17/2022	12:00 - 14:00	Wet
N/A	28	900	M	Adult	Aquarius	29.2	30.5	31.8	Open	N/A	Cloudy	Partially Away From The Sun	Cloudy Day	Vigilant	N/A	01/17/2022	12:00 - 14:00	Wet
N/A	124	900	M	Adult	Aquarius	29.2	30.5	31.8	Open	N/A	Cloudy	Towards The Sun	Cloudy Day	Vigilant	N/A	01/17/2022	12:00 - 14:00	Wet
N/A	237	900	M	Adult	Aquarius	29.2	30.5	31.8	Open	N/A	Cloudy	Partially Away From The Sun	Cloudy Day	Vigilant	N/A	01/17/2022	12:00 - 14:00	Wet
N/A	104	216	M	Adult	Melman	23.2	29.3	33.7	Road	N/A	Sunny	Towards The Sun	No Exposure	Vigilant	N/A	01/18/2022	Sunrise - 10:00	Wet
N/A	80	216	M	Adult	Melman	23.2	29.3	33.7	Road	N/A	Sunny	Partially Away From The Sun	Fully Exposed	Moving	N/A	01/18/2022	Sunrise - 10:00	Wet
N/A	32	216	M	Adult	Melman	23.2	29.3	33.7	Road	N/A	Sunny	Directly Away From The Sun	Fully Exposed	Moving	N/A	01/18/2022	Sunrise - 10:00	Wet
13:18:58	31	133	F	Adult	N/A	35.4	35	33.7	Open	N/A	Sunny	Towards The Sun	Partially Exposed	Foraging	Leaves	01/18/2022	12:00 - 14:00	Wet
13:19:29	33	133	F	Adult	N/A	35.4	35	33.7	Open	N/A	Sunny	Directly Away From The Sun	Fully Exposed	Moving	N/A	01/18/2022	12:00 - 14:00	Wet
13:19:57	28	133	F	Adult	N/A	35.4	35	33.7	Open	N/A	Sunny	Partially Away From The Sun	Fully Exposed	Foraging	Leaves	01/18/2022	12:00 - 14:00	Wet
13:22:26	16	133	F	Adult	N/A	35.4	35	33.7	Open	N/A	Sunny	Partially Away From The Sun	Fully Exposed	Vigilant	N/A	01/18/2022	12:00 - 14:00	Wet
13:22:42	25	133	F	Adult	N/A	35.4	35	33.7	Closed	N/A	Sunny	Partially Away From The Sun	Fully Exposed	Moving	N/A	01/18/2022	12:00 - 14:00	Wet
10:35:08	74	591	M	Juvenile	Kaleb	28.3	31.5	34.8	Open	N/A	Sunny	Partially Away From The Sun	No Exposure	Vigilant	N/A	01/20/2022	12:00 - 14:00	Wet
10:36:22	52	591	M	Juvenile	Kaleb	28.3	31.5	34.8	Open	N/A	Cloudy	Partially Away From The Sun	Partially Exposed	Foraging	Leaves	01/20/2022	12:00 - 14:00	Wet
10:37:14	46	591	M	Juvenile	Kaleb	28.3	31.5	34.8	Open	N/A	Sunny	Directly Away From The Sun	Fully Exposed	Moving	N/A	01/20/2022	12:00 - 14:00	Wet
10:38:00	49	591	M	Juvenile	Kaleb	28.3	31.5	34.8	Open	N/A	Sunny	Partially Away From The Sun	Fully Exposed	Vigilant	N/A	01/20/2022	12:00 - 14:00	Wet
10:38:49	87	591	M	Juvenile	Kaleb	28.3	31.5	34.8	Open	N/A	Sunny	Directly Away From The Sun	Fully Exposed	Moving	N/A	01/20/2022	12:00 - 14:00	Wet
10:40:16	7	591	M	Juvenile	Kaleb	28.3	31.5	34.8	Open	N/A	Sunny	Partially Away From The Sun	Fully Exposed	Moving	N/A	01/20/2022	12:00 - 14:00	Wet
10:40:23	76	591	M	Juvenile	Kaleb	28.3	31.5	34.8	Open	N/A	Cloudy	Directly Away From The Sun	Cloudy Day	Moving	N/A	01/20/2022	12:00 - 14:00	Wet
11:28:19	74	900	M	Adult	Kevin	28.3	31.5	34.8	Open	N/A	Cloudy	Partially Away From The Sun	Fully Exposed	Moving	N/A	01/20/2022	12:00 - 14:00	Wet
11:29:43	9	900	M	Adult	Kevin	28.3	31.5	34.8	Open	N/A	Sunny	Partially Away From The Sun	Partially Exposed	Vigilant	N/A	01/20/2022	12:00 - 14:00	Wet
11:29:52	35	900	M	Adult	Kevin	28.3	31.5	34.8	Open	N/A	Cloudy	Directly Away From The Sun	Fully Exposed	Moving	N/A	01/20/2022	12:00 - 14:00	Wet
11:30:27	57	900	M	Adult	Kevin	28.3	31.5	34.8	Open	N/A	Sunny	Partially Away From The Sun	Partially Exposed	Vigilant	N/A	01/20/2022	12:00 - 14:00	Wet
11:31:24	4	900	M	Adult	Kevin	28.3	31.5	34.8	Open	N/A	Sunny	Directly Away From The Sun	Fully Exposed	Vigilant	N/A	01/20/2022	12:00 - 14:00	Wet
11:31:28	66	900	M	Adult	Kevin	28.3	31.5	34.8	Open	N/A	Cloudy	Directly Away From The Sun	Cloudy Day	Moving	N/A	01/20/2022	12:00 - 14:00	Wet
11:32:34	55	900	M	Adult	Kevin	28.3	31.5	34.8	Open	N/A	Cloudy	Partially Away From The Sun	Cloudy Day	Vigilant	N/A	01/20/2022	12:00 - 14:00	Wet
11:33:29	41	900	M	Adult	Kevin	28.3	31.5	34.8	Open	N/A	Cloudy	Directly Away From The Sun	Cloudy Day	Moving	N/A	01/20/2022	12:00 - 14:00	Wet
11:34:10	84	900	M	Adult	Kevin	28.3	31.5	34.8	Open	N/A	Cloudy	Directly Away From The Sun	Cloudy Day	Vigilant	N/A	01/20/2022	12:00 - 14:00	Wet
11:35:34	24	900	M	Adult	Kevin	28.3	31.5	34.8	Open	N/A	Cloudy	Directly Away From The Sun	Cloudy Day	Moving	N/A	01/20/2022	12:00 - 14:00	Wet
11:35:58	28	900	M	Adult	Kevin	28.3	31.5	34.8	Open	N/A	Cloudy	Directly Away From The Sun	Cloudy Day	Vigilant	N/A	01/20/2022	12:00 - 14:00	Wet
11:36:26	29	900	M	Adult	Kevin	28.3	31.5	34.8	Open	N/A	Cloudy	Partially Away From The Sun	Cloudy Day	Moving	N/A	01/20/2022	12:00 - 14:00	Wet
11:36:55	13	900	M	Adult	Kevin	28.3	31.5	34.8	Open	N/A	Cloudy	Directly Away From The Sun	Cloudy Day	Moving	N/A	01/20/2022	12:00 - 14:00	Wet
11:37:08	61	900	M	Adult	Kevin	28.3	31.5	34.8	Open	N/A	Cloudy	Partially Away From The Sun	Cloudy Day	Vigilant	N/A	01/20/2022	12:00 - 14:00	Wet
11:38:09	19	900	M	Adult	Kevin	28.3	31.5	34.8	Open	N/A	Cloudy	Partially Away From The Sun	Cloudy Day	Moving	N/A	01/20/2022	12:00 - 14:00	Wet
11:38:58	49	900	M	Adult	Kevin	28.3	31.5	34.8	Open	N/A	Cloudy	Partially Away From The Sun	Cloudy Day	Vigilant	N/A	01/20/2022	12:00 - 14:00	Wet
11:39:47	77	900	M	Adult	Kevin	28.3	31.5	34.8	Road	N/A	Cloudy	Partially Away From The Sun	Cloudy Day	Moving	N/A	01/20/2022	12:00 - 14:00	Wet
11:41:04	37	900	M	Adult	Kevin	28.3	31.5	34.8	Road	N/A	Cloudy	Towards The Sun	Fully Exposed	Vigilant	N/A	01/20/2022	12:00 - 14:00	Wet
11:41:41	61	900	M	Adult	Kevin	28.3	31.5	34.8	Road	N/A	Sunny	Partially Away From The Sun	Fully Exposed	Moving	N/A	01/20/2022	12:00 - 14:00	Wet
11:42:42	44	900	M	Adult	Kevin	28.3	31.5	34.8	Road	N/A	Sunny	Partially Away From The Sun	Fully Exposed	Vigilant	N/A	01/20/2022	12:00 - 14:00	Wet
11:43:26	31	900	M	Adult	Kevin	28.3	31.5	34.8	Road	N/A	Sunny	Partially Away From The Sun	Fully Exposed	Moving	N/A	01/20/2022	12:00 - 14:00	Wet
07:52:14	42	400	F	Adult	Berthille	24.5	29.8	36	Road	N/A	Sunny	Directly Away From The Sun	No Exposure	Vigilant	N/A	01/21/2022	Sunrise - 10:00	Wet
07:52:56	19	400	F	Adult	Berthille	24.5	29.8	36	Road	N/A	Sunny	Partially Away From The Sun	Partially Exposed	Moving	N/A	01/21/2022	Sunrise - 10:00	Wet
07:53:15	47	400	F	Adult	Berthille	24.5	29.8	36	Road	N/A	Sunny	Partially Away From The Sun	Partially Exposed	Vigilant	N/A	01/21/2022	Sunrise - 10:00	Wet
07:54:02	15	400	F	Adult	Berthille	24.5	29.8	36	Road	N/A	Sunny	Partially Away From The Sun	Fully Exposed	Moving	N/A	01/21/2022	Sunrise - 10:00	Wet
07:54:17	127	400	F	Adult	Berthille	24.5	29.8	36	Road	N/A	Sunny	Towards The Sun	No Exposure	Foraging	Leaves	01/21/2022	Sunrise - 10:00	Wet
07:56:24	83	400	F	Adult	Berthille	24.5	29.8	36	Road	N/A	Sunny	Towards The Sun	No Exposure	Vigilant	N/A	01/21/2022	Sunrise - 10:00	Wet
07:57:47	44	400	F	Adult	Berthille	24.5	29.8	36	Road	N/A	Sunny	Partially Away From The Sun	Partially Exposed	Vigilant	N/A	01/21/2022	Sunrise - 10:00	Wet
07:58:31	16	400	F	Adult	Berthille	24.5	29.8	36	Road	N/A	Sunny	Towards The Sun	No Exposure	Vigilant	N/A	01/21/2022	Sunrise - 10:00	Wet
07:58:47	7	400	F	Adult	Berthille	24.5	29.8	36	Road	N/A	Sunny	Directly Away From The Sun	Fully Exposed	Moving	N/A	01/21/2022	Sunrise - 10:00	Wet
10:29:45	158	915	M	Juvenile	Napoleon	27.9	32.4	36.1	Open	N/A	Sunny	Partially Away From The Sun	Partially Exposed	Vigilant	N/A	01/24/2022	12:00 - 14:00	Wet
10:32:23	47	915	M	Juvenile	Napoleon	27.9	32.4	36.1	Open	N/A	Cloudy	Partially Away From The Sun	Cloudy Day	Vigilant	N/A	01/24/2022	12:00 - 14:00	Wet
10:33:10	59	915	M	Juvenile	Napoleon	27.9	32.4	36.1	Open	N/A	Sunny	Partially Away From The Sun	Fully Exposed	Moving	N/A	01/24/2022	12:00 - 14:00	Wet
10:34:09	40	915	M	Juvenile	Napoleon	27.9	32.4	36.1	Open	None	Cloudy	Partially Away From The Sun	Cloudy Day	Vigilant	N/A	01/24/2022	12:00 - 14:00	Wet
10:34:49	115	915	M	Juvenile	Napoleon	27.9	32.4	36.1	Open	N/A	Cloudy	Partially Away From The Sun	Cloudy Day	Vigilant	N/A	01/24/2022	12:00 - 14:00	Wet
10:36:44	57	915	M	Juvenile	Napoleon	27.9	32.4	36.1	Open	N/A	Sunny	Partially Away From The Sun	Fully Exposed	Moving	N/A	01/24/2022	12:00 - 14:00	Wet
10:37:41	53	915	M	Juvenile	Napoleon	27.9	32.4	36.1	Open	N/A	Sunny	Partially Away From The Sun	Partially Exposed	Vigilant	N/A	01/24/2022	12:00 - 14:00	Wet
10:38:34	41	915	M	Juvenile	Napoleon	27.9	32.4	36.1	Open	N/A	Sunny	Directly Away From The Sun	Fully Exposed	Moving	N/A	01/24/2022	12:00 - 14:00	Wet
10:39:15	35	915	M	Juvenile	Napoleon	27.9	32.4	36.1	Open	N/A	Sunny	Partially Away From The Sun	Fully Exposed	Vigilant	N/A	01/24/2022	12:00 - 14:00	Wet
10:39:50	30	915	M	Juvenile	Napoleon	27.9	32.4	36.1	Open	N/A	Sunny	Directly Away From The Sun	Fully Exposed	Moving	N/A	01/24/2022	12:00 - 14:00	Wet
10:40:20	29	915	M	Juvenile	Napoleon	27.9	32.4	36.1	Open	N/A	Sunny	Partially Away From The Sun	Fully Exposed	Vigilant	N/A	01/24/2022	12:00 - 14:00	Wet
10:40:49	39	915	M	Juvenile	Napoleon	27.9	32.4	36.1	Open	N/A	Cloudy	Directly Away From The Sun	Partially Exposed	Moving	N/A	01/24/2022	12:00 - 14:00	Wet
10:41:28	72	915	M	Juvenile	Napoleon	27.9	32.4	36.1	Open	N/A	Cloudy	Directly Away From The Sun	Cloudy Day	Vigilant	N/A	01/24/2022	12:00 - 14:00	Wet
10:42:40	48	915	M	Juvenile	Napoleon	27.9	32.4	36.1	Open	N/A	Cloudy	Directly Away From The Sun	Cloudy Day	Moving	N/A	01/24/2022	12:00 - 14:00	Wet
10:43:28	43	915	M	Juvenile	Napoleon	27.9	32.4	36.1	Open	N/A	Sunny	Partially Away From The Sun	Partially Exposed	Foraging	Leaves	01/24/2022	12:00 - 14:00	Wet
10:44:11	49	915	M	Juvenile	Napoleon	27.9	32.4	36.1	Open	N/A	Sunny	Partially Away From The Sun	Fully Exposed	Moving	N/A	01/24/2022	12:00 - 14:00	Wet
10:45:18	41	882	M	Juvenile	Felix	27.9	32.4	36.1	Open	N/A	Sunny	Towards The Sun	Fully Exposed	Vigilant	N/A	01/24/2022	12:00 - 14:00	Wet
10:45:59	31	882	M	Juvenile	Felix	27.9	32.4	36.1	Open	N/A	Sunny	Partially Away From The Sun	Fully Exposed	Moving	N/A	01/24/2022	12:00 - 14:00	Wet
10:46:30	27	882	M	Juvenile	Felix	27.9	32.4	36.1	Open	N/A	Sunny	Directly Away From The Sun	Fully Exposed	Moving	N/A	01/24/2022	12:00 - 14:00	Wet
10:46:57	78	882	M	Juvenile	Felix	27.9	32.4	36.1	Open	N/A	Sunny	Partially Away From The Sun	Fully Exposed	Vigilant	N/A	01/24/2022	12:00 - 14:00	Wet
10:48:15	44	882	M	Juvenile	Felix	27.9	32.4	36.1	Open	N/A	Sunny	Directly Away From The Sun	Fully Exposed	Moving	N/A	01/24/2022	12:00 - 14:00	Wet
10:48:59	23	882	M	Juvenile	Felix	27.9	32.4	36.1	Open	N/A	Sunny	Partially Away From The Sun	Fully Exposed	Vigilant	N/A	01/24/2022	12:00 - 14:00	Wet
10:49:22	20	882	M	Juvenile	Felix	27.9	32.4	36.1	Open	N/A	Sunny	Partially Away From The Sun	Fully Exposed	Moving	N/A	01/24/2022	12:00 - 14:00	Wet
10:50:42	24	882	M	Juvenile	Felix	27.9	32.4	36.1	Open	N/A	Sunny	Partially Away From The Sun	Fully Exposed	Moving	N/A	01/24/2022	12:00 - 14:00	Wet
10:51:06	42	882	M	Juvenile	Felix	27.9	32.4	36.1	Open	N/A	Sunny	Directly Away From The Sun	No Exposure	Vigilant	N/A	01/24/2022	12:00 - 14:00	Wet
10:51:48	32	882	M	Juvenile	Felix	27.9	32.4	36.1	Open	N/A	Sunny	Directly Away From The Sun	Fully Exposed	Moving	N/A	01/24/2022	12:00 - 14:00	Wet
10:52:20	25	882	M	Juvenile	Felix	27.9	32.4	36.1	Open	N/A	Sunny	Directly Away From The Sun	Fully Exposed	Vigilant	N/A	01/24/2022	12:00 - 14:00	Wet
10:52:45	54	882	M	Juvenile	Felix	27.9	32.4	36.1	Open	N/A	Sunny	Partially Away From The Sun	Fully Exposed	Moving	N/A	01/24/2022	12:00 - 14:00	Wet
10:53:39	32	882	M	Juvenile	Felix	27.9	32.4	36.1	Open	N/A	Sunny	Partially Away From The Sun	Fully Exposed	Vigilant	N/A	01/24/2022	12:00 - 14:00	Wet
10:54:11	23	882	M	Juvenile	Felix	27.9	32.4	36.1	Open	N/A	Sunny	Directly Away From The Sun	Fully Exposed	Moving	N/A	01/24/2022	12:00 - 14:00	Wet
10:54:34	55	882	M	Juvenile	Felix	27.9	32.4	36.1	Open	N/A	Sunny	Partially Away From The Sun	Fully Exposed	Vigilant	N/A	01/24/2022	12:00 - 14:00	Wet
10:55:29	271	882	M	Juvenile	Felix	27.9	32.4	36.1	Open	N/A	Sunny	Partially Away From The Sun	Fully Exposed	Foraging	Leaves	01/24/2022	12:00 - 14:00	Wet
12:38:52	166	908	F	Sub-Adult	Walter	27.9	32.4	36.1	Road	N/A	Sunny	Partially Away From The Sun	Fully Exposed	Vigilant	N/A	01/24/2022	12:00 - 14:00	Wet
12:41:38	29	908	F	Sub-Adult	Walter	27.9	32.4	36.1	Road	N/A	Sunny	Directly Away From The Sun	Fully Exposed	Moving	N/A	01/24/2022	12:00 - 14:00	Wet
12:42:07	49	908	F	Sub-Adult	Walter	27.9	32.4	36.1	Road	N/A	Sunny	Partially Away From The Sun	Fully Exposed	Vigilant	N/A	01/24/2022	12:00 - 14:00	Wet
12:42:56	62	908	F	Sub-Adult	Walter	27.9	32.4	36.1	Road	N/A	Sunny	Partially Away From The Sun	No Exposure	Vigilant	N/A	01/24/2022	12:00 - 14:00	Wet
12:43:58	36	908	F	Sub-Adult	Walter	27.9	32.4	36.1	Road	N/A	Sunny	Towards The Sun	No Exposure	Vigilant	N/A	01/24/2022	12:00 - 14:00	Wet
12:44:34	566	908	F	Sub-Adult	Walter	27.9	32.4	36.1	Road	N/A	Sunny	Partially Away From The Sun	No Exposure	Vigilant	N/A	01/24/2022	12:00 - 14:00	Wet
15:22:59	66	491	M	Juvenile	Vladimir	33.6	32.3	36.1	Open	N/A	Sunny	Directly Away From The Sun	Fully Exposed	Vigilant	N/A	01/24/2022	12:00 - 14:00	Wet
15:24:05	181	491	M	Juvenile	Vladimir	33.6	32.3	36.1	Open	N/A	Sunny	Partially Away From The Sun	Fully Exposed	Vigilant	N/A	01/24/2022	12:00 - 14:00	Wet
15:27:06	238	491	M	Juvenile	Vladimir	33.6	32.3	36.1	Road	N/A	Sunny	Partially Away From The Sun	Fully Exposed	Vigilant	N/A	01/24/2022	12:00 - 14:00	Wet
15:31:04	6	491	M	Juvenile	Vladimir	33.6	32.3	36.1	Road	N/A	Sunny	Partially Away From The Sun	Fully Exposed	Moving	N/A	01/24/2022	12:00 - 14:00	Wet
10:39:16	79	524	M	Sub-Adult	Flamenkuchen	27.5	32.9	34.8	Road	N/A	Cloudy	Towards The Sun	Cloudy Day	Vigilant	N/A	01/25/2022	12:00 - 14:00	Wet
10:40:35	36	524	M	Sub-Adult	Flamenkuchen	27.5	32.9	34.8	Road	N/A	Cloudy	Partially Away From The Sun	Partially Exposed	Moving	N/A	01/25/2022	12:00 - 14:00	Wet
10:41:11	158	524	M	Sub-Adult	Flamenkuchen	27.5	32.9	34.8	Road	N/A	Cloudy	Towards The Sun	Partially Exposed	Vigilant	N/A	01/25/2022	12:00 - 14:00	Wet
10:43:49	45	524	M	Sub-Adult	Flamenkuchen	27.5	32.9	34.8	Road	N/A	Cloudy	Partially Away From The Sun	Partially Exposed	Moving	N/A	01/25/2022	12:00 - 14:00	Wet
10:44:34	160	524	M	Sub-Adult	Flamenkuchen	27.5	32.9	34.8	Road	N/A	Cloudy	Partially Away From The Sun	Cloudy Day	Foraging	Leaves	01/25/2022	12:00 - 14:00	Wet
10:47:14	46	524	M	Sub-Adult	Flamenkuchen	27.5	32.9	34.8	Road	N/A	Cloudy	Towards The Sun	Cloudy Day	Moving	N/A	01/25/2022	12:00 - 14:00	Wet
10:49:18	86	522	F	Sub-Adult	Walter	27.5	32.9	34.8	Road	N/A	Cloudy	Directly Away From The Sun	Partially Exposed	Vigilant	N/A	01/25/2022	12:00 - 14:00	Wet
10:50:44	72	522	F	Sub-Adult	Walter	27.5	32.9	34.8	Road	N/A	Cloudy	Partially Away From The Sun	Partially Exposed	Vigilant	N/A	01/25/2022	12:00 - 14:00	Wet
10:51:56	61	522	F	Sub-Adult	Walter	27.5	32.9	34.8	Road	N/A	Overcast	Partially Away From The Sun	Cloudy Day	Moving	N/A	01/25/2022	12:00 - 14:00	Wet
10:52:57	144	522	F	Sub-Adult	Walter	27.5	32.9	34.8	Road	N/A	Overcast	Partially Away From The Sun	Cloudy Day	Foraging	Leaves	01/25/2022	12:00 - 14:00	Wet
10:55:21	66	522	F	Sub-Adult	Walter	27.5	32.9	34.8	Road	N/A	Overcast	Directly Away From The Sun	Cloudy Day	Foraging	Leaves	01/25/2022	12:00 - 14:00	Wet
10:56:27	59	522	F	Sub-Adult	Walter	27.5	32.9	34.8	Road	N/A	Overcast	Partially Away From The Sun	Cloudy Day	Vigilant	N/A	01/25/2022	12:00 - 14:00	Wet
10:57:26	34	522	F	Sub-Adult	Walter	27.5	32.9	34.8	Road	N/A	Overcast	Partially Away From The Sun	Cloudy Day	Moving	N/A	01/25/2022	12:00 - 14:00	Wet
10:58:36	335	804	M	Juvenile	Banana	27.5	32.9	34.8	Road	N/A	Cloudy	Towards The Sun	Partially Exposed	Vigilant	N/A	01/25/2022	12:00 - 14:00	Wet
11:04:11	286	804	M	Juvenile	Banana	27.5	32.9	34.8	Road	N/A	Cloudy	Partially Away From The Sun	Partially Exposed	Vigilant	N/A	01/25/2022	12:00 - 14:00	Wet
11:08:57	183	804	M	Juvenile	Banana	27.5	32.9	34.8	Road	N/A	Sunny	Directly Away From The Sun	Partially Exposed	Vigilant	N/A	01/25/2022	12:00 - 14:00	Wet
11:12:09	87	891	M	Adult	Aquarius	27.5	32.9	34.8	Road	N/A	Cloudy	Directly Away From The Sun	Cloudy Day	Vigilant	N/A	01/25/2022	12:00 - 14:00	Wet
11:13:36	32	891	M	Adult	Aquarius	27.5	32.9	34.8	Road	N/A	Cloudy	Towards The Sun	Cloudy Day	Interacting	N/A	01/25/2022	12:00 - 14:00	Wet
11:14:08	49	891	M	Adult	Aquarius	27.5	32.9	34.8	Road	N/A	Cloudy	Partially Away From The Sun	Cloudy Day	Interacting	N/A	01/25/2022	12:00 - 14:00	Wet
11:14:57	88	891	M	Adult	Aquarius	27.5	32.9	34.8	Road	N/A	Sunny	Directly Away From The Sun	No Exposure	Interacting	N/A	01/25/2022	12:00 - 14:00	Wet
11:16:25	64	891	M	Adult	Aquarius	27.5	32.9	34.8	Road	N/A	Sunny	Partially Away From The Sun	Fully Exposed	Moving	N/A	01/25/2022	12:00 - 14:00	Wet
11:17:29	119	891	M	Adult	Aquarius	27.5	32.9	34.8	Road	N/A	Sunny	Partially Away From The Sun	Partially Exposed	Interacting	N/A	01/25/2022	12:00 - 14:00	Wet
11:19:28	38	891	M	Adult	Aquarius	27.5	32.9	34.8	Road	N/A	Sunny	Partially Away From The Sun	Fully Exposed	Moving	N/A	01/25/2022	12:00 - 14:00	Wet
11:20:06	89	891	M	Adult	Aquarius	27.5	32.9	34.8	Road	N/A	Sunny	Partially Away From The Sun	Fully Exposed	Vigilant	N/A	01/25/2022	12:00 - 14:00	Wet
11:21:35	79	891	M	Adult	Aquarius	27.5	32.9	34.8	Road	N/A	Sunny	Directly Away From The Sun	Fully Exposed	Vigilant	N/A	01/25/2022	12:00 - 14:00	Wet
11:22:54	204	891	M	Adult	Aquarius	27.5	32.9	34.8	Road	N/A	Sunny	Partially Away From The Sun	Fully Exposed	Vigilant	N/A	01/25/2022	12:00 - 14:00	Wet
11:26:18	42	891	M	Adult	Aquarius	27.5	32.9	34.8	Road	N/A	Sunny	Directly Away From The Sun	Fully Exposed	Moving	N/A	01/25/2022	12:00 - 14:00	Wet
11:27:36	84	84	M	Adult	Polp	27.5	32.9	34.8	Road	N/A	Sunny	Directly Away From The Sun	Fully Exposed	Foraging	Leaves	01/25/2022	12:00 - 14:00	Wet
11:30:19	127	161	F	Adult	Berthille	27.5	32.9	34.8	Road	N/A	Sunny	Towards The Sun	Fully Exposed	Vigilant	N/A	01/25/2022	12:00 - 14:00	Wet
11:32:26	34	161	F	Adult	Berthille	27.5	32.9	34.8	Road	N/A	Sunny	Partially Away From The Sun	Fully Exposed	Moving	N/A	01/25/2022	12:00 - 14:00	Wet
11:34:22	84	518	M	Adult	Sun	27.5	32.9	34.8	Road	N/A	Sunny	Directly Away From The Sun	Fully Exposed	Vigilant	N/A	01/25/2022	12:00 - 14:00	Wet
11:35:46	200	518	M	Adult	Sun	27.5	32.9	34.8	Road	N/A	Sunny	Towards The Sun	Fully Exposed	Vigilant	N/A	01/25/2022	12:00 - 14:00	Wet
11:39:06	47	518	M	Adult	Sun	27.5	32.9	34.8	Road	N/A	Sunny	Directly Away From The Sun	Fully Exposed	Vigilant	N/A	01/25/2022	12:00 - 14:00	Wet
11:39:53	124	518	M	Adult	Sun	27.5	32.9	34.8	Road	N/A	Sunny	Directly Away From The Sun	No Exposure	Foraging	Leaves	01/25/2022	12:00 - 14:00	Wet
11:41:57	63	518	M	Adult	Sun	27.5	32.9	34.8	Road	N/A	Sunny	Directly Away From The Sun	No Exposure	Moving	N/A	01/25/2022	12:00 - 14:00	Wet
10:27:37	35	863	M	Adult	Kevin	27.7	28.9	30.5	Open	N/A	Cloudy	Towards The Sun	Fully Exposed	Moving	N/A	01/27/2022	12:00 - 14:00	Wet
10:28:12	115	863	M	Adult	Kevin	27.7	28.9	30.5	Open	N/A	Cloudy	Partially Away From The Sun	Partially Exposed	Foraging	Leaves	01/27/2022	12:00 - 14:00	Wet
10:30:07	26	863	M	Adult	Kevin	27.7	28.9	30.5	Open	N/A	Cloudy	Towards The Sun	Partially Exposed	Foraging	Leaves	01/27/2022	12:00 - 14:00	Wet
10:30:33	61	863	M	Adult	Kevin	27.7	28.9	30.5	Open	N/A	Cloudy	Towards The Sun	Partially Exposed	Moving	N/A	01/27/2022	12:00 - 14:00	Wet
10:31:34	237	863	M	Adult	Kevin	27.7	28.9	30.5	Open	N/A	Overcast	Towards The Sun	Cloudy Day	Foraging	Leaves	01/27/2022	12:00 - 14:00	Wet
10:35:31	43	863	M	Adult	Kevin	27.7	28.9	30.5	Open	N/A	Cloudy	Partially Away From The Sun	Partially Exposed	Foraging	Leaves	01/27/2022	12:00 - 14:00	Wet
10:36:14	346	863	M	Adult	Kevin	27.7	28.9	30.5	Open	N/A	Overcast	Directly Away From The Sun	Cloudy Day	Foraging	Leaves	01/27/2022	12:00 - 14:00	Wet
10:42:31	38	499	M	Juvenile	Banana	27.7	28.9	30.5	Road	N/A	Overcast	Directly Away From The Sun	Cloudy Day	Interacting	N/A	01/27/2022	12:00 - 14:00	Wet
10:43:09	28	499	M	Juvenile	Banana	27.7	28.9	30.5	Road	N/A	Sunny	Towards The Sun	Fully Exposed	Vigilant	N/A	01/27/2022	12:00 - 14:00	Wet
10:43:37	35	499	M	Juvenile	Banana	27.7	28.9	30.5	Road	N/A	Sunny	Partially Away From The Sun	Fully Exposed	Interacting	N/A	01/27/2022	12:00 - 14:00	Wet
10:44:12	78	499	M	Juvenile	Banana	27.7	28.9	30.5	Road	N/A	Cloudy	Directly Away From The Sun	Partially Exposed	Vigilant	N/A	01/27/2022	12:00 - 14:00	Wet
10:45:30	30	499	M	Juvenile	Banana	27.7	28.9	30.5	Road	N/A	Cloudy	Directly Away From The Sun	Partially Exposed	Moving	N/A	01/27/2022	12:00 - 14:00	Wet
10:46:43	90	677	M	Adult	Aquarius	27.7	28.9	30.5	Open	N/A	Cloudy	Partially Away From The Sun	Partially Exposed	Vigilant	N/A	01/27/2022	12:00 - 14:00	Wet
10:48:13	40	677	M	Adult	Aquarius	27.7	28.9	30.5	Open	N/A	Cloudy	Directly Away From The Sun	Partially Exposed	Moving	N/A	01/27/2022	12:00 - 14:00	Wet
10:48:53	41	677	M	Adult	Aquarius	27.7	28.9	30.5	Open	N/A	Sunny	Directly Away From The Sun	Fully Exposed	Vigilant	N/A	01/27/2022	12:00 - 14:00	Wet
10:49:34	33	677	M	Adult	Aquarius	27.7	28.9	30.5	Open	N/A	Sunny	Partially Away From The Sun	Fully Exposed	Vigilant	N/A	01/27/2022	12:00 - 14:00	Wet
10:50:07	31	677	M	Adult	Aquarius	27.7	28.9	30.5	Open	N/A	Sunny	Directly Away From The Sun	Fully Exposed	Vigilant	N/A	01/27/2022	12:00 - 14:00	Wet
10:50:38	36	677	M	Adult	Aquarius	27.7	28.9	30.5	Open	N/A	Cloudy	Partially Away From The Sun	Partially Exposed	Vigilant	N/A	01/27/2022	12:00 - 14:00	Wet
10:51:14	71	677	M	Adult	Aquarius	27.7	28.9	30.5	Open	N/A	Cloudy	Directly Away From The Sun	Partially Exposed	Moving	N/A	01/27/2022	12:00 - 14:00	Wet
10:52:25	34	677	M	Adult	Aquarius	27.7	28.9	30.5	Open	N/A	Overcast	Directly Away From The Sun	Cloudy Day	Moving	N/A	01/27/2022	12:00 - 14:00	Wet
10:52:59	46	677	M	Adult	Aquarius	27.7	28.9	30.5	Road	N/A	Overcast	Partially Away From The Sun	Cloudy Day	Moving	N/A	01/27/2022	12:00 - 14:00	Wet
10:53:45	28	677	M	Adult	Aquarius	27.7	28.9	30.5	Open	N/A	Overcast	Partially Away From The Sun	Cloudy Day	Foraging	Leaves	01/27/2022	12:00 - 14:00	Wet
10:54:13	66	677	M	Adult	Aquarius	27.7	28.9	30.5	Open	N/A	Overcast	Partially Away From The Sun	Cloudy Day	Moving	N/A	01/27/2022	12:00 - 14:00	Wet
10:55:19	47	677	M	Adult	Aquarius	27.7	28.9	30.5	Open	N/A	Overcast	Partially Away From The Sun	Cloudy Day	Foraging	Leaves	01/27/2022	12:00 - 14:00	Wet
10:56:06	99	677	M	Adult	Aquarius	27.7	28.9	30.5	Open	N/A	Overcast	Directly Away From The Sun	Cloudy Day	Foraging	Leaves	01/27/2022	12:00 - 14:00	Wet
10:57:45	15	677	M	Adult	Aquarius	27.7	28.9	30.5	Open	N/A	Overcast	Directly Away From The Sun	Cloudy Day	Moving	N/A	01/27/2022	12:00 - 14:00	Wet
10:59:50	65	1560	M	Juvenile	Banana	27.7	28.9	30.5	Open	N/A	Sunny	Partially Away From The Sun	No Exposure	Vigilant	N/A	01/27/2022	12:00 - 14:00	Wet
11:00:55	160	1560	M	Juvenile	Banana	27.7	28.9	30.5	Open	N/A	Overcast	Partially Away From The Sun	Cloudy Day	Foraging	Leaves	01/27/2022	12:00 - 14:00	Wet
11:03:35	58	1560	M	Juvenile	Banana	27.7	28.9	30.5	Open	N/A	Overcast	Partially Away From The Sun	Cloudy Day	Vigilant	N/A	01/27/2022	12:00 - 14:00	Wet
11:04:33	38	1560	M	Juvenile	Banana	27.7	28.9	30.5	Open	N/A	Cloudy	Partially Away From The Sun	Partially Exposed	Moving	N/A	01/27/2022	12:00 - 14:00	Wet
11:05:11	33	1560	M	Juvenile	Banana	27.7	28.9	30.5	Open	N/A	Cloudy	Partially Away From The Sun	Partially Exposed	Foraging	Leaves	01/27/2022	12:00 - 14:00	Wet
11:05:44	99	1560	M	Juvenile	Banana	27.7	28.9	30.5	Open	N/A	Overcast	Towards The Sun	Cloudy Day	Foraging	Leaves	01/27/2022	12:00 - 14:00	Wet
11:07:23	248	1560	M	Juvenile	Banana	27.7	28.9	30.5	Open	N/A	Overcast	Towards The Sun	Cloudy Day	Vigilant	Leaves	01/27/2022	12:00 - 14:00	Wet
11:11:31	110	1560	M	Juvenile	Banana	27.7	28.9	30.5	Open	N/A	Overcast	Directly Away From The Sun	Cloudy Day	Vigilant	N/A	01/27/2022	12:00 - 14:00	Wet
11:13:21	77	1560	M	Juvenile	Banana	27.7	28.9	30.5	Open	N/A	Overcast	Partially Away From The Sun	Cloudy Day	Vigilant	N/A	01/27/2022	12:00 - 14:00	Wet
11:14:38	28	1560	M	Juvenile	Banana	27.7	28.9	30.5	Open	N/A	Overcast	Partially Away From The Sun	Cloudy Day	Moving	N/A	01/27/2022	12:00 - 14:00	Wet
11:15:06	560	1560	M	Juvenile	Banana	27.7	28.9	30.5	Open	N/A	Overcast	Partially Away From The Sun	Cloudy Day	Vigilant	N/A	01/27/2022	12:00 - 14:00	Wet
11:24:26	29	1560	M	Juvenile	Banana	27.7	28.9	30.5	Open	N/A	Overcast	Partially Away From The Sun	Cloudy Day	Moving	N/A	01/27/2022	12:00 - 14:00	Wet
11:24:55	30	1560	M	Juvenile	Banana	27.7	28.9	30.5	Open	N/A	Overcast	Directly Away From The Sun	Cloudy Day	Moving	N/A	01/27/2022	12:00 - 14:00	Wet
11:25:25	35	1560	M	Juvenile	Banana	27.7	28.9	30.5	Open	N/A	Overcast	Partially Away From The Sun	Cloudy Day	Vigilant	N/A	01/27/2022	12:00 - 14:00	Wet
15:25:20	32	520	M	Adult	Polp	29.6	27.5	30.5	Open	N/A	Sunny	Towards The Sun	Fully Exposed	Vigilant	N/A	01/27/2022	16:00 - Sunset	Wet
15:25:52	43	520	M	Adult	Polp	29.6	27.5	30.5	Open	N/A	Sunny	Towards The Sun	Fully Exposed	Moving	N/A	01/27/2022	16:00 - Sunset	Wet
15:26:35	48	520	M	Adult	Polp	29.6	27.5	30.5	Open	N/A	Sunny	Partially Away From The Sun	Fully Exposed	Vigilant	N/A	01/27/2022	16:00 - Sunset	Wet
15:27:23	46	520	M	Adult	Polp	29.6	27.5	30.5	Open	N/A	Cloudy	Partially Away From The Sun	Partially Exposed	Moving	N/A	01/27/2022	16:00 - Sunset	Wet
15:28:09	29	520	M	Adult	Polp	29.6	27.5	30.5	Open	N/A	Cloudy	Towards The Sun	Partially Exposed	Vigilant	N/A	01/27/2022	16:00 - Sunset	Wet
15:28:38	71	520	M	Adult	Polp	29.6	27.5	30.5	Open	N/A	Overcast	Partially Away From The Sun	Cloudy Day	Moving	N/A	01/27/2022	16:00 - Sunset	Wet
15:29:49	24	520	M	Adult	Polp	29.6	27.5	30.5	Open	N/A	Overcast	Towards The Sun	Cloudy Day	Vigilant	N/A	01/27/2022	16:00 - Sunset	Wet
15:30:13	99	520	M	Adult	Polp	29.6	27.5	30.5	Open	N/A	Overcast	Partially Away From The Sun	Cloudy Day	Vigilant	N/A	01/27/2022	16:00 - Sunset	Wet
15:31:52	84	520	M	Adult	Polp	29.6	27.5	30.5	Open	N/A	Overcast	Partially Away From The Sun	Cloudy Day	Interacting	N/A	01/27/2022	16:00 - Sunset	Wet
15:33:16	44	520	M	Adult	Polp	29.6	27.5	30.5	Open	N/A	Overcast	Partially Away From The Sun	Cloudy Day	Moving	N/A	01/27/2022	16:00 - Sunset	Wet
15:34:04	109	776	M	Adult	Lovely	29.6	27.5	30.5	Open	N/A	Cloudy	Partially Away From The Sun	Partially Exposed	Vigilant	N/A	01/27/2022	16:00 - Sunset	Wet
15:35:53	30	776	M	Adult	Lovely	29.6	27.5	30.5	Open	N/A	Sunny	Towards The Sun	Fully Exposed	Moving	N/A	01/27/2022	16:00 - Sunset	Wet
15:36:23	88	776	M	Adult	Lovely	29.6	27.5	30.5	Open	N/A	Sunny	Partially Away From The Sun	Fully Exposed	Vigilant	N/A	01/27/2022	16:00 - Sunset	Wet
15:37:51	36	776	M	Adult	Lovely	29.6	27.5	30.5	Open	N/A	Cloudy	Partially Away From The Sun	Partially Exposed	Vigilant	N/A	01/27/2022	16:00 - Sunset	Wet
15:38:27	63	776	M	Adult	Lovely	29.6	27.5	30.5	Open	N/A	Overcast	Directly Away From The Sun	Cloudy Day	Moving	N/A	01/27/2022	16:00 - Sunset	Wet
15:39:30	45	776	M	Adult	Lovely	29.6	27.5	30.5	Open	N/A	Overcast	Partially Away From The Sun	Cloudy Day	Vigilant	N/A	01/27/2022	16:00 - Sunset	Wet
15:40:15	33	776	M	Adult	Lovely	29.6	27.5	30.5	Open	N/A	Overcast	Towards The Sun	Cloudy Day	Vigilant	N/A	01/27/2022	16:00 - Sunset	Wet
15:40:48	125	776	M	Adult	Lovely	29.6	27.5	30.5	Open	N/A	Overcast	Partially Away From The Sun	Cloudy Day	Vigilant	N/A	01/27/2022	16:00 - Sunset	Wet
15:42:53	28	776	M	Adult	Lovely	29.6	27.5	30.5	Open	N/A	Overcast	Partially Away From The Sun	Cloudy Day	Moving	N/A	01/27/2022	16:00 - Sunset	Wet
15:43:21	111	776	M	Adult	Lovely	29.6	27.5	30.5	Open	N/A	Overcast	Partially Away From The Sun	Cloudy Day	Vigilant	N/A	01/27/2022	16:00 - Sunset	Wet
15:45:12	108	776	M	Adult	Lovely	29.6	27.5	30.5	Open	N/A	Cloudy	Partially Away From The Sun	Partially Exposed	Moving	N/A	01/27/2022	16:00 - Sunset	Wet
15:47:30	56	150	F	Sub-Adult	Walter	29.6	27.5	30.5	Open	N/A	Cloudy	Towards The Sun	Partially Exposed	Vigilant	N/A	01/27/2022	16:00 - Sunset	Wet
15:48:26	30	150	F	Sub-Adult	Walter	29.6	27.5	30.5	Open	N/A	Cloudy	Partially Away From The Sun	Partially Exposed	Moving	N/A	01/27/2022	16:00 - Sunset	Wet
15:48:56	23	150	F	Sub-Adult	Walter	29.6	27.5	30.5	Open	N/A	Overcast	Towards The Sun	Cloudy Day	Vigilant	N/A	01/27/2022	16:00 - Sunset	Wet
15:49:19	41	150	F	Sub-Adult	Walter	29.6	27.5	30.5	Open	N/A	Overcast	Towards The Sun	Cloudy Day	Moving	N/A	01/27/2022	16:00 - Sunset	Wet
10:18:39	112	921	M	Sub-Adult	Flamenkuchen	25.8	30.4	31.9	Road	N/A	Overcast	Towards The Sun	Cloudy Day	Vigilant	N/A	01/31/2022	12:00 - 14:00	Wet
10:20:31	126	921	M	Sub-Adult	Flamenkuchen	25.8	30.4	31.9	Road	N/A	Overcast	Partially Away From The Sun	Cloudy Day	Moving	N/A	01/31/2022	12:00 - 14:00	Wet
10:22:37	26	921	M	Sub-Adult	Flamenkuchen	25.8	30.4	31.9	Open	N/A	Sunny	Directly Away From The Sun	Fully Exposed	Vigilant	N/A	01/31/2022	12:00 - 14:00	Wet
10:23:03	30	921	M	Sub-Adult	Flamenkuchen	25.8	30.4	31.9	Open	N/A	Sunny	Directly Away From The Sun	Partially Exposed	Moving	N/A	01/31/2022	12:00 - 14:00	Wet
10:23:33	108	921	M	Sub-Adult	Flamenkuchen	25.8	30.4	31.9	Open	N/A	Sunny	Directly Away From The Sun	Fully Exposed	Vigilant	N/A	01/31/2022	12:00 - 14:00	Wet
10:25:21	30	921	M	Sub-Adult	Flamenkuchen	25.8	30.4	31.9	Open	N/A	Cloudy	Directly Away From The Sun	Partially Exposed	Moving	N/A	01/31/2022	12:00 - 14:00	Wet
10:25:51	140	921	M	Sub-Adult	Flamenkuchen	25.8	30.4	31.9	Open	N/A	Overcast	Partially Away From The Sun	Cloudy Day	Vigilant	N/A	01/31/2022	12:00 - 14:00	Wet
10:28:11	27	921	M	Sub-Adult	Flamenkuchen	25.8	30.4	31.9	Open	N/A	Overcast	Directly Away From The Sun	Cloudy Day	Moving	N/A	01/31/2022	12:00 - 14:00	Wet
10:28:38	82	921	M	Sub-Adult	Flamenkuchen	25.8	30.4	31.9	Open	N/A	Cloudy	Directly Away From The Sun	Partially Exposed	Vigilant	N/A	01/31/2022	12:00 - 14:00	Wet
10:30:00	53	921	M	Sub-Adult	Flamenkuchen	25.8	30.4	31.9	Open	N/A	Sunny	Directly Away From The Sun	Fully Exposed	Vigilant	N/A	01/31/2022	12:00 - 14:00	Wet
10:30:53	51	921	M	Sub-Adult	Flamenkuchen	25.8	30.4	31.9	Open	N/A	Sunny	Partially Away From The Sun	Fully Exposed	Vigilant	N/A	01/31/2022	12:00 - 14:00	Wet
10:31:44	37	921	M	Sub-Adult	Flamenkuchen	25.8	30.4	31.9	Open	N/A	Sunny	Directly Away From The Sun	Partially Exposed	Vigilant	N/A	01/31/2022	12:00 - 14:00	Wet
10:32:21	59	921	M	Sub-Adult	Flamenkuchen	25.8	30.4	31.9	Open	N/A	Overcast	Directly Away From The Sun	Cloudy Day	Vigilant	N/A	01/31/2022	12:00 - 14:00	Wet
10:33:20	40	921	M	Sub-Adult	Flamenkuchen	25.8	30.4	31.9	Open	N/A	Overcast	Towards The Sun	Cloudy Day	Vigilant	N/A	01/31/2022	12:00 - 14:00	Wet
10:34:32	24	568	M	Adult	Lovely	25.8	30.4	31.9	Open	N/A	Overcast	Partially Away From The Sun	Cloudy Day	Moving	N/A	01/31/2022	12:00 - 14:00	Wet
10:34:56	31	568	M	Adult	Lovely	25.8	30.4	31.9	Open	N/A	Overcast	Directly Away From The Sun	Cloudy Day	Vigilant	N/A	01/31/2022	12:00 - 14:00	Wet
10:35:27	37	568	M	Adult	Lovely	25.8	30.4	31.9	Open	N/A	Overcast	Directly Away From The Sun	Cloudy Day	Moving	N/A	01/31/2022	12:00 - 14:00	Wet
10:36:04	26	568	M	Adult	Lovely	25.8	30.4	31.9	Open	N/A	Overcast	Directly Away From The Sun	Cloudy Day	Vigilant	N/A	01/31/2022	12:00 - 14:00	Wet
10:36:30	60	568	M	Adult	Lovely	25.8	30.4	31.9	Open	N/A	Cloudy	Partially Away From The Sun	Partially Exposed	Moving	N/A	01/31/2022	12:00 - 14:00	Wet
10:37:30	50	568	M	Adult	Lovely	25.8	30.4	31.9	Open	N/A	Overcast	Partially Away From The Sun	Cloudy Day	Vigilant	N/A	01/31/2022	12:00 - 14:00	Wet
10:38:20	30	568	M	Adult	Lovely	25.8	30.4	31.9	Open	N/A	Overcast	Directly Away From The Sun	Cloudy Day	Vigilant	N/A	01/31/2022	12:00 - 14:00	Wet
10:38:50	24	568	M	Adult	Lovely	25.8	30.4	31.9	Open	N/A	Sunny	Directly Away From The Sun	Fully Exposed	Moving	N/A	01/31/2022	12:00 - 14:00	Wet
10:39:14	226	568	M	Adult	Lovely	25.8	30.4	31.9	Open	N/A	Sunny	Directly Away From The Sun	Partially Exposed	Vigilant	N/A	01/31/2022	12:00 - 14:00	Wet
10:43:00	60	568	M	Adult	Lovely	25.8	30.4	31.9	Open	N/A	Cloudy	Directly Away From The Sun	Partially Exposed	Moving	N/A	01/31/2022	12:00 - 14:00	Wet
10:44:09	55	591	F	Adult	Berthille	25.8	30.4	31.9	Open	N/A	Sunny	Partially Away From The Sun	Fully Exposed	Vigilant	N/A	01/31/2022	12:00 - 14:00	Wet
10:45:04	33	591	F	Adult	Berthille	25.8	30.4	31.9	Open	N/A	Sunny	Directly Away From The Sun	Fully Exposed	Moving	N/A	01/31/2022	12:00 - 14:00	Wet
10:45:37	43	591	F	Adult	Berthille	25.8	30.4	31.9	Open	N/A	Sunny	Partially Away From The Sun	Fully Exposed	Vigilant	N/A	01/31/2022	12:00 - 14:00	Wet
10:46:20	29	591	F	Adult	Berthille	25.8	30.4	31.9	Open	N/A	Sunny	Partially Away From The Sun	Fully Exposed	Moving	N/A	01/31/2022	12:00 - 14:00	Wet
10:46:49	22	591	F	Adult	Berthille	25.8	30.4	31.9	Open	N/A	Sunny	Towards The Sun	Fully Exposed	Moving	N/A	01/31/2022	12:00 - 14:00	Wet
10:47:11	23	591	F	Adult	Berthille	25.8	30.4	31.9	Open	N/A	Sunny	Partially Away From The Sun	Fully Exposed	Moving	N/A	01/31/2022	12:00 - 14:00	Wet
10:47:34	49	591	F	Adult	Berthille	25.8	30.4	31.9	Open	N/A	Sunny	Directly Away From The Sun	Fully Exposed	Moving	N/A	01/31/2022	12:00 - 14:00	Wet
10:48:23	68	591	F	Adult	Berthille	25.8	30.4	31.9	Open	N/A	Overcast	Directly Away From The Sun	Cloudy Day	Moving	N/A	01/31/2022	12:00 - 14:00	Wet
10:49:31	35	591	F	Adult	Berthille	25.8	30.4	31.9	Open	N/A	Overcast	Partially Away From The Sun	Cloudy Day	Vigilant	N/A	01/31/2022	12:00 - 14:00	Wet
10:50:06	85	591	F	Adult	Berthille	25.8	30.4	31.9	Open	N/A	Cloudy	Towards The Sun	Partially Exposed	Vigilant	N/A	01/31/2022	12:00 - 14:00	Wet
10:51:31	39	591	F	Adult	Berthille	25.8	30.4	31.9	Open	N/A	Sunny	Towards The Sun	Fully Exposed	Moving	N/A	01/31/2022	12:00 - 14:00	Wet
10:52:10	23	591	F	Adult	Berthille	25.8	30.4	31.9	Open	N/A	Overcast	Partially Away From The Sun	Cloudy Day	Vigilant	N/A	01/31/2022	12:00 - 14:00	Wet
10:52:33	27	591	F	Adult	Berthille	25.8	30.4	31.9	Open	N/A	Overcast	Directly Away From The Sun	Cloudy Day	Vigilant	N/A	01/31/2022	12:00 - 14:00	Wet
10:53:00	60	591	F	Adult	Berthille	25.8	30.4	31.9	Open	N/A	Overcast	Directly Away From The Sun	Cloudy Day	Moving	N/A	01/31/2022	12:00 - 14:00	Wet
15:20:02	132	902	M	Adult	Vejay	32.8	30.8	31.9	Open	N/A	Sunny	Partially Away From The Sun	Fully Exposed	Vigilant	N/A	01/31/2022	16:00 - Sunset	Wet
15:22:14	108	902	M	Adult	Vejay	32.8	30.8	31.9	Open	N/A	Overcast	Partially Away From The Sun	Cloudy Day	Vigilant	N/A	01/31/2022	16:00 - Sunset	Wet
15:23:58	115	902	M	Adult	Vejay	32.8	30.8	31.9	Open	N/A	Cloudy	Partially Away From The Sun	Partially Exposed	Vigilant	N/A	01/31/2022	16:00 - Sunset	Wet
15:25:53	25	902	M	Adult	Vejay	32.8	30.8	31.9	Open	N/A	Cloudy	Directly Away From The Sun	Partially Exposed	Moving	N/A	01/31/2022	16:00 - Sunset	Wet
15:26:18	365	902	M	Adult	Vejay	32.8	30.8	31.9	Open	N/A	Overcast	Partially Away From The Sun	Cloudy Day	Vigilant	N/A	01/31/2022	16:00 - Sunset	Wet
15:32:23	38	902	M	Adult	Vejay	32.8	30.8	31.9	Open	N/A	Overcast	Directly Away From The Sun	Cloudy Day	Moving	N/A	01/31/2022	16:00 - Sunset	Wet
15:33:01	53	902	M	Adult	Vejay	32.8	30.8	31.9	Open	N/A	Overcast	Directly Away From The Sun	Cloudy Day	Vigilant	N/A	01/31/2022	16:00 - Sunset	Wet
15:33:54	66	902	M	Adult	Vejay	32.8	30.8	31.9	Open	N/A	Cloudy	Partially Away From The Sun	Partially Exposed	Vigilant	N/A	01/31/2022	16:00 - Sunset	Wet
11:22:38	129	802	M	Adult	McFly	27.7	29.8	32.5	Open	N/A	Overcast	Partially Away From The Sun	Cloudy Day	Vigilant	N/A	2022-01-02	12:00 - 14:00	Wet
11:24:47	135	802	M	Adult	McFly	27.7	29.8	32.5	Open	N/A	Sunny	Towards The Sun	Fully Exposed	Vigilant	N/A	2022-01-02	12:00 - 14:00	Wet
11:27:02	30	802	M	Adult	McFly	27.7	29.8	32.5	Open	N/A	Sunny	Partially Away From The Sun	Fully Exposed	Moving	N/A	2022-01-02	12:00 - 14:00	Wet
11:27:32	86	802	M	Adult	McFly	27.7	29.8	32.5	Open	N/A	Sunny	Partially Away From The Sun	Fully Exposed	Vigilant	N/A	2022-01-02	12:00 - 14:00	Wet
11:28:58	47	802	M	Adult	McFly	27.7	29.8	32.5	Open	N/A	Cloudy	Towards The Sun	Partially Exposed	Moving	N/A	2022-01-02	12:00 - 14:00	Wet
11:29:45	36	802	M	Adult	McFly	27.7	29.8	32.5	Open	N/A	Overcast	Partially Away From The Sun	Cloudy Day	Moving	N/A	2022-01-02	12:00 - 14:00	Wet
11:30:21	54	802	M	Adult	McFly	27.7	29.8	32.5	Open	N/A	Overcast	Towards The Sun	Cloudy Day	Vigilant	N/A	2022-01-02	12:00 - 14:00	Wet
11:31:15	78	802	M	Adult	McFly	27.7	29.8	32.5	Open	N/A	Overcast	Partially Away From The Sun	Cloudy Day	Moving	N/A	2022-01-02	12:00 - 14:00	Wet
11:32:33	103	802	M	Adult	McFly	27.7	29.8	32.5	Open	N/A	Overcast	Partially Away From The Sun	Cloudy Day	Vigilant	N/A	2022-01-02	12:00 - 14:00	Wet
11:34:16	32	802	M	Adult	McFly	27.7	29.8	32.5	Open	N/A	Overcast	Partially Away From The Sun	Cloudy Day	Foraging	Leaves	2022-01-02	12:00 - 14:00	Wet
11:34:48	30	802	M	Adult	McFly	27.7	29.8	32.5	Open	N/A	Overcast	Partially Away From The Sun	Cloudy Day	Moving	N/A	2022-01-02	12:00 - 14:00	Wet
11:35:18	42	802	M	Adult	McFly	27.7	29.8	32.5	Open	N/A	Overcast	Towards The Sun	Cloudy Day	Moving	N/A	2022-01-02	12:00 - 14:00	Wet
11:36:15	26	525	M	Adult	Melman	27.7	29.8	32.5	Open	N/A	Overcast	Towards The Sun	Cloudy Day	Vigilant	N/A	2022-01-02	12:00 - 14:00	Wet
11:36:41	71	525	M	Adult	Melman	27.7	29.8	32.5	Open	N/A	Overcast	Partially Away From The Sun	Cloudy Day	Moving	N/A	2022-01-02	12:00 - 14:00	Wet
11:37:52	35	525	M	Adult	Melman	27.7	29.8	32.5	Open	N/A	Sunny	Towards The Sun	Fully Exposed	Vigilant	N/A	2022-01-02	12:00 - 14:00	Wet
11:38:27	38	525	M	Adult	Melman	27.7	29.8	32.5	Road	N/A	Sunny	Directly Away From The Sun	Fully Exposed	Moving	N/A	2022-01-02	12:00 - 14:00	Wet
11:39:05	36	525	M	Adult	Melman	27.7	29.8	32.5	Open	N/A	Sunny	Directly Away From The Sun	Fully Exposed	Vigilant	N/A	2022-01-02	12:00 - 14:00	Wet
11:39:41	30	525	M	Adult	Melman	27.7	29.8	32.5	Open	N/A	Sunny	Partially Away From The Sun	Fully Exposed	Moving	N/A	2022-01-02	12:00 - 14:00	Wet
11:40:11	112	525	M	Adult	Melman	27.7	29.8	32.5	Closed	N/A	Sunny	Directly Away From The Sun	Fully Exposed	Moving	N/A	2022-01-02	12:00 - 14:00	Wet
11:42:03	25	525	M	Adult	Melman	27.7	29.8	32.5	Open	N/A	Sunny	Directly Away From The Sun	Fully Exposed	Vigilant	N/A	2022-01-02	12:00 - 14:00	Wet
11:42:28	51	525	M	Adult	Melman	27.7	29.8	32.5	Open	N/A	Sunny	Directly Away From The Sun	Fully Exposed	Moving	N/A	2022-01-02	12:00 - 14:00	Wet
11:43:19	29	525	M	Adult	Melman	27.7	29.8	32.5	Open	N/A	Sunny	Directly Away From The Sun	Fully Exposed	Vigilant	N/A	2022-01-02	12:00 - 14:00	Wet
11:43:48	72	525	M	Adult	Melman	27.7	29.8	32.5	Open	N/A	Sunny	Directly Away From The Sun	Fully Exposed	Moving	N/A	2022-01-02	12:00 - 14:00	Wet
15:14:37	64	743	F	Adult	Berthille	31.8	31.9	32.5	Road	N/A	Sunny	Towards The Sun	Fully Exposed	Vigilant	N/A	2022-01-02	16:00 - Sunset	Wet
15:15:41	49	743	F	Adult	Berthille	31.8	31.9	32.5	Road	N/A	Sunny	Directly Away From The Sun	Fully Exposed	Moving	N/A	2022-01-02	16:00 - Sunset	Wet
15:16:30	75	743	F	Adult	Berthille	31.8	31.9	32.5	Open	N/A	Sunny	Partially Away From The Sun	Fully Exposed	Vigilant	N/A	2022-01-02	16:00 - Sunset	Wet
15:17:45	162	743	F	Adult	Berthille	31.8	31.9	32.5	Road	N/A	Cloudy	Towards The Sun	Partially Exposed	Vigilant	N/A	2022-01-02	16:00 - Sunset	Wet
15:20:27	85	743	F	Adult	Berthille	31.8	31.9	32.5	Road	N/A	Sunny	Partially Away From The Sun	Fully Exposed	Vigilant	N/A	2022-01-02	16:00 - Sunset	Wet
15:21:52	32	743	F	Adult	Berthille	31.8	31.9	32.5	Road	N/A	Sunny	Partially Away From The Sun	Fully Exposed	Moving	N/A	2022-01-02	16:00 - Sunset	Wet
15:22:24	31	743	F	Adult	Berthille	31.8	31.9	32.5	Open	N/A	Cloudy	Directly Away From The Sun	Partially Exposed	Vigilant	N/A	2022-01-02	16:00 - Sunset	Wet
15:22:55	134	743	F	Adult	Berthille	31.8	31.9	32.5	Open	N/A	Cloudy	Partially Away From The Sun	Partially Exposed	Drinking	N/A	2022-01-02	16:00 - Sunset	Wet
15:25:09	29	743	F	Adult	Berthille	31.8	31.9	32.5	Road	N/A	Overcast	Partially Away From The Sun	Cloudy Day	Moving	N/A	2022-01-02	16:00 - Sunset	Wet
15:25:38	36	743	F	Adult	Berthille	31.8	31.9	32.5	Open	N/A	Overcast	Partially Away From The Sun	Cloudy Day	Vigilant	N/A	2022-01-02	16:00 - Sunset	Wet
15:26:14	32	743	F	Adult	Berthille	31.8	31.9	32.5	Open	N/A	Overcast	Partially Away From The Sun	Cloudy Day	Moving	N/A	2022-01-02	16:00 - Sunset	Wet
15:26:46	14	743	F	Adult	Berthille	31.8	31.9	32.5	Open	N/A	Overcast	Directly Away From The Sun	Cloudy Day	Moving	N/A	2022-01-02	16:00 - Sunset	Wet
15:27:46	41	134	F	Adult	Pumba	31.8	31.9	32.5	Open	N/A	Overcast	Partially Away From The Sun	Cloudy Day	Vigilant	N/A	2022-01-02	16:00 - Sunset	Wet
15:28:27	62	134	F	Adult	Pumba	31.8	31.9	32.5	Open	N/A	Overcast	Directly Away From The Sun	Cloudy Day	Moving	N/A	2022-01-02	16:00 - Sunset	Wet
15:29:29	31	134	F	Adult	Pumba	31.8	31.9	32.5	Closed	N/A	Overcast	Partially Away From The Sun	Cloudy Day	Moving	N/A	2022-01-02	16:00 - Sunset	Wet
16:09:54	45	586	M	Adult	Dark Male	31.8	31.9	32.5	Open	N/A	Cloudy	Partially Away From The Sun	Partially Exposed	Moving	N/A	2022-01-02	16:00 - Sunset	Wet
16:10:39	23	586	M	Adult	Dark Male	31.8	31.9	32.5	Road	N/A	Overcast	Directly Away From The Sun	Cloudy Day	Moving	N/A	2022-01-02	16:00 - Sunset	Wet
16:11:02	28	586	M	Adult	Dark Male	31.8	31.9	32.5	Road	N/A	Cloudy	Partially Away From The Sun	Partially Exposed	Vigilant	N/A	2022-01-02	16:00 - Sunset	Wet
16:11:30	63	586	M	Adult	Dark Male	31.8	31.9	32.5	Road	N/A	Cloudy	Partially Away From The Sun	Cloudy Day	Moving	N/A	2022-01-02	16:00 - Sunset	Wet
16:12:33	25	586	M	Adult	Dark Male	31.8	31.9	32.5	Road	N/A	Overcast	Directly Away From The Sun	Cloudy Day	Vigilant	N/A	2022-01-02	16:00 - Sunset	Wet
16:12:58	29	586	M	Adult	Dark Male	31.8	31.9	32.5	Road	N/A	Overcast	Directly Away From The Sun	Cloudy Day	Moving	N/A	2022-01-02	16:00 - Sunset	Wet
16:13:27	34	586	M	Adult	Dark Male	31.8	31.9	32.5	Open	N/A	Overcast	Partially Away From The Sun	Cloudy Day	Vigilant	N/A	2022-01-02	16:00 - Sunset	Wet
16:14:01	39	586	M	Adult	Dark Male	31.8	31.9	32.5	Road	N/A	Overcast	Partially Away From The Sun	Cloudy Day	Moving	N/A	2022-01-02	16:00 - Sunset	Wet
16:14:40	139	586	M	Adult	Dark Male	31.8	31.9	32.5	Road	N/A	Overcast	Partially Away From The Sun	Cloudy Day	Vigilant	N/A	2022-01-02	16:00 - Sunset	Wet
16:17:19	57	586	M	Adult	Dark Male	31.8	31.9	32.5	Road	N/A	Sunny	Partially Away From The Sun	Fully Exposed	Moving	N/A	2022-01-02	16:00 - Sunset	Wet
16:18:16	81	586	M	Adult	Dark Male	31.8	31.9	32.5	Road	N/A	Overcast	Partially Away From The Sun	Partially Exposed	Vigilant	N/A	2022-01-02	16:00 - Sunset	Wet
16:19:37	23	586	M	Adult	Dark Male	31.8	31.9	32.5	Road	N/A	Cloudy	Partially Away From The Sun	Partially Exposed	Moving	N/A	2022-01-02	16:00 - Sunset	Wet
08:56:24	106	876	M	Adult	Lovely	23.1	29.8	35.8	Open	N/A	Sunny	Towards The Sun	No Exposure	Foraging	Leaves	2022-02-02	Sunrise - 10:00	Wet
08:58:10	74	876	M	Adult	Lovely	23.1	29.8	35.8	Open	N/A	Sunny	Partially Away From The Sun	Partially Exposed	Foraging	Leaves	2022-02-02	Sunrise - 10:00	Wet
08:59:24	76	876	M	Adult	Lovely	23.1	29.8	35.8	Open	N/A	Sunny	Towards The Sun	No Exposure	Foraging	Leaves	2022-02-02	Sunrise - 10:00	Wet
09:00:40	85	876	M	Adult	Lovely	23.1	29.8	35.8	Open	N/A	Sunny	Directly Away From The Sun	Fully Exposed	Foraging	Leaves	2022-02-02	Sunrise - 10:00	Wet
09:02:05	278	876	M	Adult	Lovely	23.1	29.8	35.8	Open	N/A	Sunny	Directly Away From The Sun	Partially Exposed	Foraging	Leaves	2022-02-02	Sunrise - 10:00	Wet
09:06:43	51	876	M	Adult	Lovely	23.1	29.8	35.8	Open	N/A	Sunny	Partially Away From The Sun	Partially Exposed	Foraging	Leaves	2022-02-02	Sunrise - 10:00	Wet
09:07:34	134	876	M	Adult	Lovely	23.1	29.8	35.8	Open	N/A	Sunny	Partially Away From The Sun	Fully Exposed	Foraging	Leaves	2022-02-02	Sunrise - 10:00	Wet
09:09:48	72	876	M	Adult	Lovely	23.1	29.8	35.8	Open	N/A	Sunny	Directly Away From The Sun	Fully Exposed	Foraging	Leaves	2022-02-02	Sunrise - 10:00	Wet
09:15:51	117	959	M	Sub-Adult	Skinny	23.1	29.8	35.8	Open	N/A	Sunny	Towards The Sun	Fully Exposed	Vigilant	N/A	2022-02-02	Sunrise - 10:00	Wet
09:17:48	207	959	M	Sub-Adult	Skinny	23.1	29.8	35.8	Open	N/A	Sunny	Partially Away From The Sun	Fully Exposed	Vigilant	N/A	2022-02-02	Sunrise - 10:00	Wet
09:21:15	21	959	M	Sub-Adult	Skinny	23.1	29.8	35.8	Open	N/A	Sunny	Towards The Sun	Fully Exposed	Moving	N/A	2022-02-02	Sunrise - 10:00	Wet
09:21:36	29	959	M	Sub-Adult	Skinny	21.3	29.8	35.8	Open	N/A	Sunny	Towards The Sun	Fully Exposed	Vigilant	N/A	2022-02-02	Sunrise - 10:00	Wet
09:22:05	48	959	M	Sub-Adult	Skinny	23.1	29.8	35.8	Open	N/A	Sunny	Towards The Sun	Fully Exposed	Moving	N/A	2022-02-02	Sunrise - 10:00	Wet
09:22:53	274	959	M	Sub-Adult	Skinny	21.3	29.8	35.8	Open	N/A	Sunny	Towards The Sun	No Exposure	Vigilant	N/A	2022-02-02	Sunrise - 10:00	Wet
09:27:27	22	959	M	Sub-Adult	Skinny	23.1	29.8	35.8	Open	N/A	Sunny	Partially Away From The Sun	Partially Exposed	Vigilant	N/A	2022-02-02	Sunrise - 10:00	Wet
09:27:59	38	959	M	Sub-Adult	Skinny	23.1	29.8	35.8	Open	N/A	Sunny	Towards The Sun	Partially Exposed	Vigilant	N/A	2022-02-02	Sunrise - 10:00	Wet
09:28:37	44	959	M	Sub-Adult	Skinny	23.1	29.8	35.8	Open	N/A	Sunny	Directly Away From The Sun	Partially Exposed	Vigilant	N/A	2022-02-02	Sunrise - 10:00	Wet
09:29:21	26	959	M	Sub-Adult	Skinny	23.1	29.8	35.8	Open	N/A	Sunny	Partially Away From The Sun	Fully Exposed	Moving	N/A	2022-02-02	Sunrise - 10:00	Wet
09:29:47	133	959	M	Sub-Adult	Skinny	23.1	29.8	35.8	Open	N/A	Sunny	Towards The Sun	Fully Exposed	Vigilant	N/A	2022-02-02	Sunrise - 10:00	Wet
13:29:53	27	907	M	Juvenile	Sami	33	35.5	35.8	Open	N/A	Sunny	Partially Away From The Sun	Fully Exposed	Foraging	Leaves	2022-02-02	12:00 - 14:00	Wet
13:30:20	30	907	M	Juvenile	Sami	33	35.5	35.8	Open	N/A	Sunny	Partially Away From The Sun	Fully Exposed	Vigilant	N/A	2022-02-02	12:00 - 14:00	Wet
13:30:50	270	907	M	Juvenile	Sami	33	35.5	35.8	Open	N/A	Sunny	Towards The Sun	Fully Exposed	Vigilant	N/A	2022-02-02	12:00 - 14:00	Wet
13:35:20	75	907	M	Juvenile	Sami	33	35.5	35.8	Open	N/A	Sunny	Partially Away From The Sun	Fully Exposed	Foraging	Leaves	2022-02-02	12:00 - 14:00	Wet
13:36:35	38	907	M	Juvenile	Sami	33	35.5	35.8	Open	N/A	Sunny	Partially Away From The Sun	Fully Exposed	Moving	N/A	2022-02-02	12:00 - 14:00	Wet
13:37:13	40	907	M	Juvenile	Sami	33	35.5	35.8	Open	N/A	Sunny	Partially Away From The Sun	Fully Exposed	Foraging	Leaves	2022-02-02	12:00 - 14:00	Wet
13:37:53	69	907	M	Juvenile	Sami	33	35.5	35.8	Open	N/A	Sunny	Directly Away From The Sun	Fully Exposed	Foraging	Leaves	2022-02-02	12:00 - 14:00	Wet
13:39:02	47	907	M	Juvenile	Sami	33	35.5	35.8	Open	N/A	Sunny	Towards The Sun	Fully Exposed	Foraging	Leaves	2022-02-02	12:00 - 14:00	Wet
13:39:49	18	907	M	Juvenile	Sami	33	35.5	35.8	Open	N/A	Sunny	Partially Away From The Sun	Fully Exposed	Moving	N/A	2022-02-02	12:00 - 14:00	Wet
13:40:07	25	907	M	Juvenile	Sami	33	35.5	35.8	Open	N/A	Sunny	Partially Away From The Sun	Fully Exposed	Vigilant	N/A	2022-02-02	12:00 - 14:00	Wet
13:40:32	47	907	M	Juvenile	Sami	33	35.5	35.8	Open	N/A	Sunny	Towards The Sun	Fully Exposed	Vigilant	N/A	2022-02-02	12:00 - 14:00	Wet
13:41:19	44	907	M	Juvenile	Sami	33	35.5	35.8	Open	N/A	Sunny	Partially Away From The Sun	Fully Exposed	Vigilant	N/A	2022-02-02	12:00 - 14:00	Wet
13:42:03	45	907	M	Juvenile	Sami	33	35.5	35.8	Open	N/A	Sunny	Partially Away From The Sun	Fully Exposed	Foraging	Leaves	2022-02-02	12:00 - 14:00	Wet
13:42:48	57	907	M	Juvenile	Sami	33	35.5	35.8	Open	N/A	Sunny	Directly Away From The Sun	Fully Exposed	Foraging	Leaves	2022-02-02	12:00 - 14:00	Wet
13:43:45	75	907	M	Juvenile	Sami	33	35.5	35.8	Open	N/A	Sunny	Partially Away From The Sun	Fully Exposed	Foraging	Leaves	2022-02-02	12:00 - 14:00	Wet
13:45:02	84	898	M	Adult	Fidji	33	35.5	35.8	Open	N/A	Sunny	Partially Away From The Sun	Fully Exposed	Vigilant	N/A	2022-02-02	12:00 - 14:00	Wet
13:46:26	20	898	M	Adult	Fidji	33	35.5	35.8	Open	N/A	Sunny	Directly Away From The Sun	Fully Exposed	Moving	N/A	2022-02-02	12:00 - 14:00	Wet
13:46:46	27	898	M	Adult	Fidji	33	35.5	35.8	Open	N/A	Sunny	Partially Away From The Sun	Fully Exposed	Moving	N/A	2022-02-02	12:00 - 14:00	Wet
13:47:13	32	898	M	Adult	Fidji	33	35.5	35.8	Open	N/A	Sunny	Directly Away From The Sun	Fully Exposed	Moving	N/A	2022-02-02	12:00 - 14:00	Wet
13:47:45	45	898	M	Adult	Fidji	33	35.5	35.8	Open	N/A	Sunny	Towards The Sun	Fully Exposed	Vigilant	N/A	2022-02-02	12:00 - 14:00	Wet
13:48:30	44	898	M	Adult	Fidji	33	35.5	35.8	Open	N/A	Sunny	Towards The Sun	Fully Exposed	Moving	N/A	2022-02-02	12:00 - 14:00	Wet
13:49:14	101	898	M	Adult	Fidji	33	35.5	35.8	Open	N/A	Sunny	Partially Away From The Sun	Fully Exposed	Vigilant	N/A	2022-02-02	12:00 - 14:00	Wet
13:50:55	39	898	M	Adult	Fidji	33	35.5	35.8	Open	N/A	Sunny	Partially Away From The Sun	Fully Exposed	Moving	N/A	2022-02-02	12:00 - 14:00	Wet
13:51:34	98	898	M	Adult	Fidji	33	35.5	35.8	Open	N/A	Sunny	Partially Away From The Sun	Fully Exposed	Vigilant	N/A	2022-02-02	12:00 - 14:00	Wet
13:53:12	37	898	M	Adult	Fidji	33	35.5	35.8	Open	N/A	Sunny	Towards The Sun	Fully Exposed	Moving	N/A	2022-02-02	12:00 - 14:00	Wet
13:53:49	43	898	M	Adult	Fidji	33	35.5	35.8	Open	N/A	Sunny	Towards The Sun	Fully Exposed	Vigilant	N/A	2022-02-02	12:00 - 14:00	Wet
13:54:32	64	898	M	Adult	Fidji	33	35.5	35.8	Open	N/A	Sunny	Towards The Sun	Fully Exposed	Moving	N/A	2022-02-02	12:00 - 14:00	Wet
13:55:36	33	898	M	Adult	Fidji	33	35.5	35.8	Open	N/A	Sunny	Directly Away From The Sun	Fully Exposed	Moving	N/A	2022-02-02	12:00 - 14:00	Wet
13:56:09	19	898	M	Adult	Fidji	33	35.5	35.8	Open	N/A	Sunny	Partially Away From The Sun	Fully Exposed	Moving	N/A	2022-02-02	12:00 - 14:00	Wet
13:56:28	112	898	M	Adult	Fidji	33	35.5	35.8	Open	N/A	Sunny	Partially Away From The Sun	Fully Exposed	Vigilant	N/A	2022-02-02	12:00 - 14:00	Wet
13:58:20	19	898	M	Adult	Fidji	33	35.5	35.8	Open	N/A	Sunny	Directly Away From The Sun	Fully Exposed	Vigilant	N/A	2022-02-02	12:00 - 14:00	Wet
13:58:39	38	898	M	Adult	Fidji	33	35.5	35.8	Open	N/A	Sunny	Partially Away From The Sun	Fully Exposed	Vigilant	N/A	2022-02-02	12:00 - 14:00	Wet
13:59:17	19	898	M	Adult	Fidji	33	35.5	35.8	Open	N/A	Sunny	Towards The Sun	Fully Exposed	Moving	N/A	2022-02-02	12:00 - 14:00	Wet
13:59:36	24	898	M	Adult	Fidji	33	35.5	35.8	Open	N/A	Sunny	Directly Away From The Sun	Fully Exposed	Moving	N/A	2022-02-02	12:00 - 14:00	Wet
14:00:41	23	859	M	Adult	Aquarius	33	35.5	35.8	Open	N/A	Sunny	Towards The Sun	Fully Exposed	Drinking	N/A	2022-02-02	12:00 - 14:00	Wet
14:01:04	35	859	M	Adult	Aquarius	33	35.5	35.8	Open	N/A	Sunny	Directly Away From The Sun	Fully Exposed	Vigilant	N/A	2022-02-02	12:00 - 14:00	Wet
14:01:39	29	859	M	Adult	Aquarius	33	35.5	35.8	Open	N/A	Sunny	Directly Away From The Sun	Fully Exposed	Moving	N/A	2022-02-02	12:00 - 14:00	Wet
14:02:08	213	859	M	Adult	Aquarius	33	35.5	35.8	Open	N/A	Sunny	Directly Away From The Sun	Fully Exposed	Vigilant	N/A	2022-02-02	12:00 - 14:00	Wet
14:05:41	33	859	M	Adult	Aquarius	33	35.5	35.8	Open	N/A	Sunny	Directly Away From The Sun	Fully Exposed	Moving	N/A	2022-02-02	12:00 - 14:00	Wet
14:06:14	168	859	M	Adult	Aquarius	33	35.5	35.8	Open	N/A	Sunny	Directly Away From The Sun	Fully Exposed	Vigilant	N/A	2022-02-02	12:00 - 14:00	Wet
14:09:02	28	859	M	Adult	Aquarius	33	35.5	35.8	Open	N/A	Sunny	Partially Away From The Sun	Fully Exposed	Interacting	N/A	2022-02-02	12:00 - 14:00	Wet
14:09:30	27	859	M	Adult	Aquarius	33	35.5	35.8	Open	N/A	Sunny	Directly Away From The Sun	Fully Exposed	Vigilant	N/A	2022-02-02	12:00 - 14:00	Wet
14:09:57	52	859	M	Adult	Aquarius	33	35.5	35.8	Open	N/A	Sunny	Partially Away From The Sun	Fully Exposed	Vigilant	N/A	2022-02-02	12:00 - 14:00	Wet
14:10:49	42	859	M	Adult	Aquarius	33	35.5	35.8	Open	N/A	Sunny	Partially Away From The Sun	Fully Exposed	Interacting	N/A	2022-02-02	12:00 - 14:00	Wet
14:11:31	22	859	M	Adult	Aquarius	33	35.5	35.8	Open	N/A	Sunny	Partially Away From The Sun	Fully Exposed	Vigilant	N/A	2022-02-02	12:00 - 14:00	Wet
14:11:53	123	859	M	Adult	Aquarius	33	35.5	35.8	Open	N/A	Sunny	Partially Away From The Sun	Fully Exposed	Moving	N/A	2022-02-02	12:00 - 14:00	Wet
14:13:56	22	859	M	Adult	Aquarius	33	35.5	35.8	Open	N/A	Sunny	Partially Away From The Sun	Fully Exposed	Interacting	N/A	2022-02-02	12:00 - 14:00	Wet
14:14:18	33	859	M	Adult	Aquarius	33	35.5	35.8	Open	N/A	Sunny	Directly Away From The Sun	Fully Exposed	Moving	N/A	2022-02-02	12:00 - 14:00	Wet
14:14:51	9	859	M	Adult	Aquarius	33	35.5	35.8	Open	N/A	Sunny	Directly Away From The Sun	Fully Exposed	Vigilant	N/A	2022-02-02	12:00 - 14:00	Wet
10:22:14	127	706	M	Juvenile	Banana	29.7	36.1	36.2	Open	N/A	Sunny	Towards The Sun	No Exposure	Foraging	Leaves	2022-03-02	12:00 - 14:00	Wet
10:24:21	32	706	M	Juvenile	Banana	29.7	36.1	36.2	Open	N/A	Sunny	Towards The Sun	No Exposure	Vigilant	N/A	2022-03-02	12:00 - 14:00	Wet
10:24:53	40	706	M	Juvenile	Banana	29.7	36.1	36.2	Open	N/A	Sunny	Partially Away From The Sun	Partially Exposed	Vigilant	N/A	2022-03-02	12:00 - 14:00	Wet
10:25:33	22	706	M	Juvenile	Banana	29.7	36.1	36.2	Open	N/A	Sunny	Partially Away From The Sun	Fully Exposed	Vigilant	N/A	2022-03-02	12:00 - 14:00	Wet
10:25:55	21	706	M	Juvenile	Banana	29.7	36.1	36.2	Open	N/A	Sunny	Partially Away From The Sun	Fully Exposed	Moving	N/A	2022-03-02	12:00 - 14:00	Wet
10:26:16	85	706	M	Juvenile	Banana	29.7	36.1	36.2	Open	N/A	Sunny	Directly Away From The Sun	Fully Exposed	Vigilant	N/A	2022-03-02	12:00 - 14:00	Wet
10:27:41	76	706	M	Juvenile	Banana	29.7	36.1	36.2	Open	N/A	Sunny	Partially Away From The Sun	Fully Exposed	Vigilant	N/A	2022-03-02	12:00 - 14:00	Wet
10:28:57	31	706	M	Juvenile	Banana	29.7	36.1	36.2	Open	N/A	Sunny	Directly Away From The Sun	Fully Exposed	Vigilant	N/A	2022-03-02	12:00 - 14:00	Wet
10:29:28	23	706	M	Juvenile	Banana	29.7	36.1	36.2	Open	N/A	Sunny	Directly Away From The Sun	Fully Exposed	Moving	N/A	2022-03-02	12:00 - 14:00	Wet
10:29:51	57	706	M	Juvenile	Banana	29.7	36.1	36.2	Open	N/A	Sunny	Partially Away From The Sun	Fully Exposed	Foraging	Leaves	2022-03-02	12:00 - 14:00	Wet
10:30:48	76	706	M	Juvenile	Banana	29.7	36.1	36.2	Open	N/A	Sunny	Directly Away From The Sun	Fully Exposed	Moving	N/A	2022-03-02	12:00 - 14:00	Wet
10:32:04	54	706	M	Juvenile	Banana	29.7	36.1	36.2	Open	N/A	Sunny	Directly Away From The Sun	No Exposure	Vigilant	N/A	2022-03-02	12:00 - 14:00	Wet
10:32:58	62	706	M	Juvenile	Banana	29.7	36.1	36.2	Open	N/A	Sunny	Directly Away From The Sun	Fully Exposed	Moving	N/A	2022-03-02	12:00 - 14:00	Wet
10:34:15	43	885	M	Adult	Fidji	29.7	36.1	36.2	Road	N/A	Sunny	Directly Away From The Sun	Fully Exposed	Vigilant	N/A	2022-03-02	12:00 - 14:00	Wet
10:34:58	90	885	M	Adult	Fidji	29.7	36.1	36.2	Road	N/A	Sunny	Partially Away From The Sun	Fully Exposed	Vigilant	N/A	2022-03-02	12:00 - 14:00	Wet
10:36:28	25	885	M	Adult	Fidji	29.7	36.1	36.2	Road	N/A	Sunny	Towards The Sun	Fully Exposed	Vigilant	N/A	2022-03-02	12:00 - 14:00	Wet
10:36:53	29	885	M	Adult	Fidji	29.7	36.1	36.2	Road	N/A	Sunny	Towards The Sun	Fully Exposed	Moving	N/A	2022-03-02	12:00 - 14:00	Wet
10:37:22	22	885	M	Adult	Fidji	29.7	36.1	36.2	Road	N/A	Sunny	Partially Away From The Sun	Fully Exposed	Vigilant	N/A	2022-03-02	12:00 - 14:00	Wet
10:37:44	104	885	M	Adult	Fidji	29.7	36.1	36.2	Road	N/A	Sunny	Towards The Sun	Fully Exposed	Vigilant	N/A	2022-03-02	12:00 - 14:00	Wet
10:39:28	22	885	M	Adult	Fidji	29.7	36.1	36.2	Road	N/A	Sunny	Directly Away From The Sun	Fully Exposed	Vigilant	N/A	2022-03-02	12:00 - 14:00	Wet
10:39:50	37	885	M	Adult	Fidji	29.7	36.1	36.2	Road	N/A	Sunny	Towards The Sun	Fully Exposed	Vigilant	N/A	2022-03-02	12:00 - 14:00	Wet
10:40:27	40	885	M	Adult	Fidji	29.7	36.1	36.2	Road	N/A	Sunny	Partially Away From The Sun	Fully Exposed	Vigilant	N/A	2022-03-02	12:00 - 14:00	Wet
10:41:07	57	885	M	Adult	Fidji	29.7	36.1	36.2	Road	N/A	Sunny	Partially Away From The Sun	Fully Exposed	Moving	N/A	2022-03-02	12:00 - 14:00	Wet
10:42:04	31	885	M	Adult	Fidji	29.7	36.1	36.2	Road	N/A	Sunny	Towards The Sun	Fully Exposed	Vigilant	N/A	2022-03-02	12:00 - 14:00	Wet
10:42:35	32	885	M	Adult	Fidji	29.7	36.1	36.2	Open	N/A	Sunny	Towards The Sun	Fully Exposed	Moving	N/A	2022-03-02	12:00 - 14:00	Wet
10:43:07	84	885	M	Adult	Fidji	29.7	36.1	36.2	Open	N/A	Sunny	Directly Away From The Sun	Fully Exposed	Moving	N/A	2022-03-02	12:00 - 14:00	Wet
10:44:31	49	885	M	Adult	Fidji	29.7	36.1	36.2	Open	N/A	Sunny	Directly Away From The Sun	Fully Exposed	Vigilant	N/A	2022-03-02	12:00 - 14:00	Wet
10:45:20	97	885	M	Adult	Fidji	29.7	36.1	36.2	Open	N/A	Sunny	Directly Away From The Sun	Fully Exposed	Moving	N/A	2022-03-02	12:00 - 14:00	Wet
10:46:57	22	885	M	Adult	Fidji	29.7	36.1	36.2	Open	N/A	Sunny	Partially Away From The Sun	Fully Exposed	Vigilant	N/A	2022-03-02	12:00 - 14:00	Wet
10:47:19	48	885	M	Adult	Fidji	29.7	36.1	36.2	Open	N/A	Sunny	Directly Away From The Sun	Fully Exposed	Moving	N/A	2022-03-02	12:00 - 14:00	Wet
10:48:07	53	885	M	Adult	Fidji	29.7	36.1	36.2	Open	N/A	Sunny	Directly Away From The Sun	Fully Exposed	Vigilant	N/A	2022-03-02	12:00 - 14:00	Wet
10:49:44	114	616	M	Adult	Melman	29.7	36.1	36.2	Open	N/A	Sunny	Partially Away From The Sun	Fully Exposed	Vigilant	N/A	2022-03-02	12:00 - 14:00	Wet
10:51:38	29	616	M	Adult	Melman	29.7	36.1	36.2	Open	N/A	Sunny	Directly Away From The Sun	Fully Exposed	Vigilant	N/A	2022-03-02	12:00 - 14:00	Wet
10:52:07	25	616	M	Adult	Melman	29.7	36.1	36.2	Open	N/A	Sunny	Partially Away From The Sun	Fully Exposed	Moving	N/A	2022-03-02	12:00 - 14:00	Wet
10:52:32	23	616	M	Adult	Melman	29.7	36.1	36.2	Open	N/A	Sunny	Directly Away From The Sun	Fully Exposed	Vigilant	N/A	2022-03-02	12:00 - 14:00	Wet
10:52:55	30	616	M	Adult	Melman	29.7	36.1	36.2	Open	N/A	Sunny	Directly Away From The Sun	Fully Exposed	Moving	N/A	2022-03-02	12:00 - 14:00	Wet
10:53:25	43	616	M	Adult	Melman	29.7	36.1	36.2	Open	N/A	Sunny	Partially Away From The Sun	Fully Exposed	Vigilant	N/A	2022-03-02	12:00 - 14:00	Wet
10:54:08	21	616	M	Adult	Melman	29.7	36.1	36.2	Open	N/A	Sunny	Directly Away From The Sun	Fully Exposed	Moving	N/A	2022-03-02	12:00 - 14:00	Wet
10:54:29	43	616	M	Adult	Melman	29.7	36.1	36.2	Open	N/A	Sunny	Partially Away From The Sun	Fully Exposed	Vigilant	N/A	2022-03-02	12:00 - 14:00	Wet
10:55:12	79	616	M	Adult	Melman	29.7	36.1	36.2	Open	N/A	Sunny	Partially Away From The Sun	Fully Exposed	Moving	N/A	2022-03-02	12:00 - 14:00	Wet
10:56:31	47	616	M	Adult	Melman	29.7	36.1	36.2	Open	N/A	Sunny	Partially Away From The Sun	Partially Exposed	Vigilant	N/A	2022-03-02	12:00 - 14:00	Wet
10:57:18	43	616	M	Adult	Melman	29.7	36.1	36.2	Open	N/A	Sunny	Partially Away From The Sun	Fully Exposed	Moving	N/A	2022-03-02	12:00 - 14:00	Wet
10:58:01	48	616	M	Adult	Melman	29.7	36.1	36.2	Open	N/A	Sunny	Towards The Sun	Fully Exposed	Vigilant	N/A	2022-03-02	12:00 - 14:00	Wet
10:58:49	71	616	M	Adult	Melman	29.7	36.1	36.2	Open	N/A	Sunny	Partially Away From The Sun	Fully Exposed	Moving	N/A	2022-03-02	12:00 - 14:00	Wet
07:26:26	37	694	M	Adult	McFly	26.1	31.8	35.4	Road	N/A	Sunny	Partially Away From The Sun	Fully Exposed	Vigilant	N/A	2022-04-02	Sunrise - 10:00	Wet
07:27:03	21	694	M	Adult	McFly	26.1	31.8	35.4	Road	N/A	Sunny	Directly Away From The Sun	Fully Exposed	Moving	N/A	2022-04-02	Sunrise - 10:00	Wet
07:27:24	55	694	M	Adult	McFly	26.1	31.8	35.4	Road	N/A	Sunny	Partially Away From The Sun	Fully Exposed	Vigilant	N/A	2022-04-02	Sunrise - 10:00	Wet
07:28:19	23	694	M	Adult	McFly	26.1	31.8	35.4	Road	N/A	Sunny	Directly Away From The Sun	Fully Exposed	Moving	N/A	2022-04-02	Sunrise - 10:00	Wet
07:28:42	47	694	M	Adult	McFly	26.1	31.8	35.4	Road	N/A	Sunny	Partially Away From The Sun	Fully Exposed	Vigilant	N/A	2022-04-02	Sunrise - 10:00	Wet
07:29:29	70	694	M	Adult	McFly	26.1	31.8	35.4	Closed	N/A	Sunny	Partially Away From The Sun	Fully Exposed	Moving	N/A	2022-04-02	Sunrise - 10:00	Wet
07:30:39	36	694	M	Adult	McFly	26.1	31.8	35.4	Closed	N/A	Sunny	Towards The Sun	Partially Exposed	Vigilant	N/A	2022-04-02	Sunrise - 10:00	Wet
07:31:15	19	694	M	Adult	McFly	26.1	31.8	35.4	Closed	N/A	Sunny	Towards The Sun	No Exposure	Foraging	Leaves	2022-04-02	Sunrise - 10:00	Wet
07:34:34	26	694	M	Adult	McFly	26.1	31.8	35.4	Closed	N/A	Sunny	Directly Away From The Sun	Partially Exposed	Moving	N/A	2022-04-02	Sunrise - 10:00	Wet
07:35:00	49	694	M	Adult	McFly	26.1	31.8	35.4	Closed	N/A	Sunny	Directly Away From The Sun	No Exposure	Foraging	Leaves	2022-04-02	Sunrise - 10:00	Wet
07:35:49	50	694	M	Adult	McFly	26.1	31.8	35.4	Closed	N/A	Sunny	Partially Away From The Sun	Partially Exposed	Foraging	Leaves	2022-04-02	Sunrise - 10:00	Wet
07:36:39	43	694	M	Adult	McFly	26.1	31.8	35.4	Closed	N/A	Sunny	Partially Away From The Sun	Partially Exposed	Moving	N/A	2022-04-02	Sunrise - 10:00	Wet
07:37:22	218	694	M	Adult	McFly	26.1	31.8	35.4	Closed	N/A	Sunny	Partially Away From The Sun	Partially Exposed	Foraging	Leaves	2022-04-02	Sunrise - 10:00	Wet
07:46:42	323	378	F	Adult	Noumea	26.1	31.8	35.4	Road	N/A	Sunny	Towards The Sun	No Exposure	Vigilant	N/A	2022-04-02	Sunrise - 10:00	Wet
07:52:05	28	378	F	Adult	Noumea	26.1	31.8	35.4	Road	N/A	Sunny	Towards The Sun	Partially Exposed	Vigilant	N/A	2022-04-02	Sunrise - 10:00	Wet
07:52:33	27	378	F	Adult	Noumea	26.1	31.8	35.4	Road	N/A	Sunny	Directly Away From The Sun	Fully Exposed	Moving	N/A	2022-04-02	Sunrise - 10:00	Wet
08:37:44	400	496	F	Adult	Emily	26.1	31.8	35.4	Road	N/A	Cloudy	Partially Away From The Sun	Cloudy Day	Vigilant	N/A	2022-04-02	Sunrise - 10:00	Wet
08:44:24	85	496	F	Adult	Emily	26.1	31.8	35.4	Road	N/A	Cloudy	Towards The Sun	Cloudy Day	Foraging	Leaves	2022-04-02	Sunrise - 10:00	Wet
08:45:49	11	496	F	Adult	Emily	26.1	31.8	35.4	Road	N/A	Cloudy	Partially Away From The Sun	Partially Exposed	Moving	N/A	2022-04-02	Sunrise - 10:00	Wet
08:49:13	107	527	F	Adult	Madame Butterfly	26.1	31.8	35.4	Open	N/A	Cloudy	Directly Away From The Sun	Partially Exposed	Vigilant	N/A	2022-04-02	Sunrise - 10:00	Wet
08:51:00	34	527	F	Adult	Madame Butterfly	26.1	31.8	35.4	Open	N/A	Sunny	Towards The Sun	Fully Exposed	Vigilant	N/A	2022-04-02	Sunrise - 10:00	Wet
08:51:34	62	527	F	Adult	Madame Butterfly	26.1	31.8	35.4	Closed	N/A	Sunny	Towards The Sun	Fully Exposed	Moving	N/A	2022-04-02	Sunrise - 10:00	Wet
08:52:36	53	527	F	Adult	Madame Butterfly	26.1	31.8	35.4	Closed	N/A	Cloudy	Towards The Sun	Cloudy Day	Vigilant	N/A	2022-04-02	Sunrise - 10:00	Wet
08:53:29	55	527	F	Adult	Madame Butterfly	26.1	31.8	35.4	Closed	N/A	Cloudy	Towards The Sun	Partially Exposed	Moving	N/A	2022-04-02	Sunrise - 10:00	Wet
08:54:24	44	527	F	Adult	Madame Butterfly	26.1	31.8	35.4	Closed	N/A	Cloudy	Towards The Sun	Partially Exposed	Vigilant	N/A	2022-04-02	Sunrise - 10:00	Wet
08:55:08	54	527	F	Adult	Madame Butterfly	26.1	31.8	35.4	Closed	N/A	Cloudy	Partially Away From The Sun	Partially Exposed	Moving	N/A	2022-04-02	Sunrise - 10:00	Wet
08:56:02	48	527	F	Adult	Madame Butterfly	26.1	31.8	35.4	Closed	N/A	Overcast	Partially Away From The Sun	Cloudy Day	Vigilant	N/A	2022-04-02	Sunrise - 10:00	Wet
08:56:50	31	527	F	Adult	Madame Butterfly	26.1	31.8	35.4	Closed	N/A	Overcast	Partially Away From The Sun	Cloudy Day	Moving	N/A	2022-04-02	Sunrise - 10:00	Wet
08:57:21	39	527	F	Adult	Madame Butterfly	26.1	31.8	35.4	Open	N/A	Cloudy	Towards The Sun	Partially Exposed	Moving	N/A	2022-04-02	Sunrise - 10:00	Wet
12:18:08	80	892	M	Adult	Dark Male	32.1	32.1	33.5	Closed	N/A	Sunny	Directly Away From The Sun	Fully Exposed	Vigilant	N/A	2022-07-02	12:00 - 14:00	Wet
12:19:28	250	892	M	Adult	Dark Male	32.1	32.1	33.5	Closed	N/A	Sunny	Directly Away From The Sun	Partially Exposed	Foraging	Leaves	2022-07-02	12:00 - 14:00	Wet
12:23:38	26	892	M	Adult	Dark Male	32.1	32.1	33.5	Closed	N/A	Sunny	Directly Away From The Sun	Fully Exposed	Moving	N/A	2022-07-02	12:00 - 14:00	Wet
12:24:04	30	892	M	Adult	Dark Male	32.1	32.1	33.5	Closed	N/A	Sunny	Directly Away From The Sun	Fully Exposed	Vigilant	N/A	2022-07-02	12:00 - 14:00	Wet
12:24:34	22	892	M	Adult	Dark Male	32.1	32.1	33.5	Closed	N/A	Sunny	Directly Away From The Sun	Fully Exposed	Moving	N/A	2022-07-02	12:00 - 14:00	Wet
12:24:56	29	892	M	Adult	Dark Male	32.1	32.1	33.5	Closed	N/A	Sunny	Directly Away From The Sun	Fully Exposed	Foraging	Leaves	2022-07-02	12:00 - 14:00	Wet
12:25:25	34	892	M	Adult	Dark Male	32.1	32.1	33.5	Closed	N/A	Sunny	Directly Away From The Sun	Fully Exposed	Vigilant	N/A	2022-07-02	12:00 - 14:00	Wet
12:25:59	237	892	M	Adult	Dark Male	32.1	32.1	33.5	Closed	N/A	Cloudy	Directly Away From The Sun	Cloudy Day	Foraging	Leaves	2022-07-02	12:00 - 14:00	Wet
12:29:56	36	892	M	Adult	Dark Male	32.1	32.1	33.5	Closed	N/A	Cloudy	Towards The Sun	Cloudy Day	Vigilant	N/A	2022-07-02	12:00 - 14:00	Wet
12:30:32	28	892	M	Adult	Dark Male	32.1	32.1	33.5	Closed	N/A	Cloudy	Directly Away From The Sun	Cloudy Day	Foraging	Leaves	2022-07-02	12:00 - 14:00	Wet
12:31:00	25	892	M	Adult	Dark Male	32.1	32.1	33.5	Closed	N/A	Cloudy	Partially Away From The Sun	Cloudy Day	Vigilant	N/A	2022-07-02	12:00 - 14:00	Wet
12:31:25	95	892	M	Adult	Dark Male	32.1	32.1	33.5	Closed	N/A	Sunny	Directly Away From The Sun	Fully Exposed	Foraging	Leaves	2022-07-02	12:00 - 14:00	Wet
12:35:45	93	615	M	Adult	Fidji	32.1	32.1	33.5	Road	N/A	Sunny	Towards The Sun	Fully Exposed	Vigilant	N/A	2022-07-02	12:00 - 14:00	Wet
12:37:18	50	615	M	Adult	Fidji	32.1	32.1	33.5	Road	N/A	Sunny	Partially Away From The Sun	Fully Exposed	Vigilant	N/A	2022-07-02	12:00 - 14:00	Wet
12:38:08	49	615	M	Adult	Fidji	32.1	32.1	33.5	Road	N/A	Sunny	Partially Away From The Sun	Fully Exposed	Inactive	N/A	2022-07-02	12:00 - 14:00	Wet
12:38:57	25	615	M	Adult	Fidji	32.1	32.1	33.5	Road	N/A	Sunny	Directly Away From The Sun	Fully Exposed	Inactive	N/A	2022-07-02	12:00 - 14:00	Wet
12:39:22	22	615	M	Adult	Fidji	32.1	32.1	33.5	Road	N/A	Sunny	Directly Away From The Sun	Fully Exposed	Moving	N/A	2022-07-02	12:00 - 14:00	Wet
12:39:44	29	615	M	Adult	Fidji	32.1	32.1	33.5	Road	N/A	Sunny	Directly Away From The Sun	Fully Exposed	Inactive	N/A	2022-07-02	12:00 - 14:00	Wet
12:40:13	27	615	M	Adult	Fidji	32.1	32.1	33.5	Road	N/A	Sunny	Towards The Sun	Fully Exposed	Vigilant	N/A	2022-07-02	12:00 - 14:00	Wet
12:40:40	41	615	M	Adult	Fidji	32.1	32.1	33.5	Road	N/A	Sunny	Partially Away From The Sun	Fully Exposed	Inactive	N/A	2022-07-02	12:00 - 14:00	Wet
12:41:21	90	615	M	Adult	Fidji	32.1	32.1	33.5	Road	N/A	Sunny	Partially Away From The Sun	Fully Exposed	Interacting	N/A	2022-07-02	12:00 - 14:00	Wet
12:42:51	34	615	M	Adult	Fidji	32.1	32.1	33.5	Road	N/A	Sunny	Partially Away From The Sun	Fully Exposed	Inactive	N/A	2022-07-02	12:00 - 14:00	Wet
12:43:25	137	615	M	Adult	Fidji	32.1	32.1	33.5	Open	N/A	Sunny	Directly Away From The Sun	Fully Exposed	Moving	N/A	2022-07-02	12:00 - 14:00	Wet
12:45:42	18	615	M	Adult	Fidji	32.1	32.1	33.5	Road	N/A	Sunny	Directly Away From The Sun	Fully Exposed	Inactive	N/A	2022-07-02	12:00 - 14:00	Wet
12:46:07	252	893	M	Adult	McFly	32.1	32.1	33.5	Road	N/A	Sunny	Directly Away From The Sun	Fully Exposed	Moving	N/A	2022-07-02	12:00 - 14:00	Wet
12:50:19	60	893	M	Adult	McFly	32.1	32.1	33.5	Open	N/A	Sunny	Partially Away From The Sun	Partially Exposed	Foraging	Leaves	2022-07-02	12:00 - 14:00	Wet
12:51:19	28	893	M	Adult	McFly	32.1	32.1	33.5	Open	N/A	Sunny	Towards The Sun	Partially Exposed	Foraging	Leaves	2022-07-02	12:00 - 14:00	Wet
12:51:47	184	893	M	Adult	McFly	32.1	32.1	33.5	Open	N/A	Cloudy	Directly Away From The Sun	Cloudy Day	Foraging	Leaves	2022-07-02	12:00 - 14:00	Wet
12:54:01	220	893	M	Adult	McFly	32.1	32.1	33.5	Open	N/A	Cloudy	Partially Away From The Sun	Cloudy Day	Foraging	Leaves	2022-07-02	12:00 - 14:00	Wet
12:57:41	28	893	M	Adult	McFly	32.1	32.1	33.5	Open	N/A	Sunny	Partially Away From The Sun	Partially Exposed	Inactive	N/A	2022-07-02	12:00 - 14:00	Wet
12:58:09	103	893	M	Adult	McFly	32.1	32.1	33.5	Open	N/A	Sunny	Partially Away From The Sun	Partially Exposed	Foraging	Leaves	2022-07-02	12:00 - 14:00	Wet
12:59:52	28	893	M	Adult	McFly	32.1	32.1	33.5	Open	N/A	Cloudy	Partially Away From The Sun	Cloudy Day	Foraging	Leaves	2022-07-02	12:00 - 14:00	Wet
13:00:20	22	893	M	Adult	McFly	32.1	32.1	33.5	Open	N/A	Cloudy	Towards The Sun	Cloudy Day	Moving	N/A	2022-07-02	12:00 - 14:00	Wet
13:00:42	18	893	M	Adult	McFly	32.1	32.1	33.5	Open	N/A	Sunny	Partially Away From The Sun	Partially Exposed	Foraging	Leaves	2022-07-02	12:00 - 14:00	Wet
16:16:07	41	653	M	Sub-Adult	Skinny	32.1	32.1	33.5	Open	N/A	Cloudy	Directly Away From The Sun	Cloudy Day	Moving	N/A	2022-07-02	16:00 - Sunset	Wet
16:16:48	92	653	M	Sub-Adult	Skinny	32.1	31.4	33.5	Open	N/A	Cloudy	Partially Away From The Sun	Cloudy Day	Vigilant	N/A	2022-07-02	16:00 - Sunset	Wet
16:18:20	23	653	M	Sub-Adult	Skinny	32.1	31.4	33.5	Open	N/A	Cloudy	Directly Away From The Sun	Cloudy Day	Moving	N/A	2022-07-02	16:00 - Sunset	Wet
16:18:43	54	653	M	Sub-Adult	Skinny	32.1	31.4	33.5	Open	N/A	Cloudy	Partially Away From The Sun	Cloudy Day	Vigilant	N/A	2022-07-02	16:00 - Sunset	Wet
16:19:37	22	653	M	Sub-Adult	Skinny	32.1	31.4	33.5	Open	N/A	Cloudy	Directly Away From The Sun	Cloudy Day	Moving	N/A	2022-07-02	16:00 - Sunset	Wet
16:19:59	168	653	M	Sub-Adult	Skinny	32.1	31.4	33.5	Open	N/A	Cloudy	Partially Away From The Sun	Cloudy Day	Vigilant	N/A	2022-07-02	16:00 - Sunset	Wet
16:22:47	173	653	M	Sub-Adult	Skinny	32.1	31.4	33.5	Open	N/A	Cloudy	Partially Away From The Sun	Cloudy Day	Inactive	N/A	2022-07-02	16:00 - Sunset	Wet
16:25:40	43	653	M	Sub-Adult	Skinny	32.1	31.4	33.5	Open	N/A	Cloudy	Partially Away From The Sun	Cloudy Day	Moving	N/A	2022-07-02	16:00 - Sunset	Wet
16:26:23	37	653	M	Sub-Adult	Skinny	32.1	31.4	33.5	Open	N/A	Cloudy	Partially Away From The Sun	Cloudy Day	Moving	N/A	2022-07-02	16:00 - Sunset	Wet
17:05:59	52	901	M	Juvenile	Kaleb	32.1	31.4	33.5	Open	N/A	Cloudy	Partially Away From The Sun	Cloudy Day	Vigilant	N/A	2022-07-02	16:00 - Sunset	Wet
17:06:51	23	901	M	Juvenile	Kaleb	32.1	31.4	33.5	Open	N/A	Cloudy	Partially Away From The Sun	Cloudy Day	Moving	N/A	2022-07-02	16:00 - Sunset	Wet
17:07:14	45	901	M	Juvenile	Kaleb	32.1	31.4	33.5	Open	N/A	Cloudy	Towards The Sun	Cloudy Day	Vigilant	N/A	2022-07-02	16:00 - Sunset	Wet
17:07:59	22	901	M	Juvenile	Kaleb	32.1	31.4	33.5	Open	N/A	Cloudy	Towards The Sun	Cloudy Day	Moving	N/A	2022-07-02	16:00 - Sunset	Wet
17:08:21	25	901	M	Juvenile	Kaleb	32.1	31.4	33.5	Open	N/A	Cloudy	Towards The Sun	Cloudy Day	Vigilant	N/A	2022-07-02	16:00 - Sunset	Wet
17:08:46	32	901	M	Juvenile	Kaleb	32.1	31.4	33.5	Open	N/A	Cloudy	Partially Away From The Sun	Cloudy Day	Moving	N/A	2022-07-02	16:00 - Sunset	Wet
17:09:18	6	901	M	Juvenile	Kaleb	32.1	31.4	33.5	Open	N/A	Cloudy	Towards The Sun	Cloudy Day	Inactive	N/A	2022-07-02	16:00 - Sunset	Wet
17:10:24	69	901	M	Juvenile	Kaleb	32.1	31.4	33.5	Open	N/A	Sunny	Towards The Sun	Fully Exposed	Moving	N/A	2022-07-02	16:00 - Sunset	Wet
17:11:33	34	901	M	Juvenile	Kaleb	32.1	31.4	33.5	Open	N/A	Sunny	Towards The Sun	Fully Exposed	Vigilant	N/A	2022-07-02	16:00 - Sunset	Wet
17:12:07	274	901	M	Juvenile	Kaleb	32.1	31.4	33.5	Open	N/A	Cloudy	Towards The Sun	Cloudy Day	Inactive	N/A	2022-07-02	16:00 - Sunset	Wet
17:16:41	26	901	M	Juvenile	Kaleb	32.1	31.4	33.5	Open	N/A	Cloudy	Partially Away From The Sun	Cloudy Day	Moving	N/A	2022-07-02	16:00 - Sunset	Wet
17:17:07	76	901	M	Juvenile	Kaleb	32.1	31.4	33.5	Open	N/A	Cloudy	Partially Away From The Sun	Cloudy Day	Inactive	N/A	2022-07-02	16:00 - Sunset	Wet
17:18:23	33	901	M	Juvenile	Kaleb	32.1	31.4	33.5	Road	N/A	Cloudy	Towards The Sun	Cloudy Day	Moving	N/A	2022-07-02	16:00 - Sunset	Wet
17:18:56	124	901	M	Juvenile	Kaleb	32.1	31.4	33.5	Road	N/A	Cloudy	Partially Away From The Sun	Cloudy Day	Inactive	N/A	2022-07-02	16:00 - Sunset	Wet
17:21:05	83	595	M	Juvenile	Marseilles	32.1	31.4	33.5	Open	N/A	Cloudy	Directly Away From The Sun	Cloudy Day	Vigilant	N/A	2022-07-02	16:00 - Sunset	Wet
17:22:28	41	595	M	Juvenile	Marseilles	32.1	31.4	33.5	Open	N/A	Cloudy	Partially Away From The Sun	Cloudy Day	Moving	N/A	2022-07-02	16:00 - Sunset	Wet
17:23:09	71	595	M	Juvenile	Marseilles	32.1	31.4	33.5	Open	N/A	Cloudy	Partially Away From The Sun	Cloudy Day	Vigilant	N/A	2022-07-02	16:00 - Sunset	Wet
17:24:20	28	595	M	Juvenile	Marseilles	32.1	31.4	33.5	Open	N/A	Cloudy	Directly Away From The Sun	Cloudy Day	Inactive	N/A	2022-07-02	16:00 - Sunset	Wet
17:24:48	31	595	M	Juvenile	Marseilles	32.1	31.4	33.5	Open	N/A	Cloudy	Partially Away From The Sun	Cloudy Day	Moving	N/A	2022-07-02	16:00 - Sunset	Wet
17:25:19	26	595	M	Juvenile	Marseilles	32.1	31.4	33.5	Open	N/A	Cloudy	Partially Away From The Sun	Cloudy Day	Inactive	N/A	2022-07-02	16:00 - Sunset	Wet
17:25:45	47	595	M	Juvenile	Marseilles	32.1	31.4	33.5	Open	N/A	Cloudy	Towards The Sun	Cloudy Day	Moving	N/A	2022-07-02	16:00 - Sunset	Wet
17:26:32	234	595	M	Juvenile	Marseilles	32.1	31.4	33.5	Open	N/A	Cloudy	Towards The Sun	Cloudy Day	Foraging	Leaves	2022-07-02	16:00 - Sunset	Wet
17:30:26	34	595	M	Juvenile	Marseilles	32.1	31.4	33.5	Open	N/A	Cloudy	Towards The Sun	Cloudy Day	Moving	N/A	2022-07-02	16:00 - Sunset	Wet
12:18:23	771	877	F	Adult	Vendetta	29.6	32.5	35.5	Open	N/A	Cloudy	Directly Away From The Sun	Cloudy Day	Foraging	Leaves	2022-08-02	12:00 - 14:00	Wet
12:31:14	86	877	F	Adult	Vendetta	29.6	32.5	35.5	Open	N/A	Cloudy	Partially Away From The Sun	Cloudy Day	Vigilant	N/A	2022-08-02	12:00 - 14:00	Wet
12:32:40	20	877	F	Adult	Vendetta	29.6	32.5	35.5	Open	N/A	Sunny	Partially Away From The Sun	Fully Exposed	Vigilant	N/A	2022-08-02	12:00 - 14:00	Wet
12:35:57	67	483	F	Adult	Wolke	29.6	32.5	35.5	Open	N/A	Sunny	Partially Away From The Sun	Fully Exposed	Moving	N/A	2022-08-02	12:00 - 14:00	Wet
12:37:04	32	483	F	Adult	Wolke	29.6	32.5	35.5	Open	N/A	Sunny	Towards The Sun	Partially Exposed	Foraging	Leaves	2022-08-02	12:00 - 14:00	Wet
12:37:36	94	483	F	Adult	Wolke	29.6	32.5	35.5	Open	N/A	Sunny	Partially Away From The Sun	Fully Exposed	Moving	N/A	2022-08-02	12:00 - 14:00	Wet
12:39:10	30	483	F	Adult	Wolke	29.6	32.5	35.5	Open	N/A	Sunny	Partially Away From The Sun	Fully Exposed	Inactive	N/A	2022-08-02	12:00 - 14:00	Wet
12:39:40	55	483	F	Adult	Wolke	29.6	32.5	35.5	Open	N/A	Sunny	Partially Away From The Sun	Fully Exposed	Moving	N/A	2022-08-02	12:00 - 14:00	Wet
12:40:35	71	483	F	Adult	Wolke	29.6	32.5	35.5	Open	N/A	Sunny	Partially Away From The Sun	Partially Exposed	Foraging	Branches	2022-08-02	12:00 - 14:00	Wet
12:41:46	50	483	F	Adult	Wolke	29.6	32.5	35.5	Open	N/A	Sunny	Partially Away From The Sun	Fully Exposed	Moving	N/A	2022-08-02	12:00 - 14:00	Wet
12:42:36	24	483	F	Adult	Wolke	29.6	32.5	35.5	Open	N/A	Sunny	Towards The Sun	Fully Exposed	Foraging	Leaves	2022-08-02	12:00 - 14:00	Wet
12:43:00	30	483	F	Adult	Wolke	29.6	32.5	35.5	Open	N/A	Sunny	Partially Away From The Sun	Fully Exposed	Moving	N/A	2022-08-02	12:00 - 14:00	Wet
12:43:30	30	483	F	Adult	Wolke	29.6	32.5	35.5	Closed	N/A	Sunny	Towards The Sun	Fully Exposed	Moving	N/A	2022-08-02	12:00 - 14:00	Wet
13:24:38	40	922	M	Adult	Forest	29.6	32.5	35.5	Open	N/A	Sunny	Towards The Sun	Fully Exposed	Inactive	N/A	2022-08-02	12:00 - 14:00	Wet
13:25:18	882	922	M	Adult	Forest	29.6	32.5	35.5	Open	N/A	Sunny	Towards The Sun	Fully Exposed	Vigilant	N/A	2022-08-02	12:00 - 14:00	Wet
15:58:51	66	909	M	Adult	Fidji	33.5	32.8	35.5	Road	N/A	Sunny	Partially Away From The Sun	Fully Exposed	Vigilant	N/A	2022-08-02	16:00 - Sunset	Wet
15:59:57	184	909	M	Adult	Fidji	33.5	32.8	35.5	Road	N/A	Sunny	Partially Away From The Sun	Fully Exposed	Inactive	N/A	2022-08-02	16:00 - Sunset	Wet
16:03:01	62	909	M	Adult	Fidji	33.5	32.8	35.5	Road	N/A	Sunny	Directly Away From The Sun	Fully Exposed	Inactive	N/A	2022-08-02	16:00 - Sunset	Wet
16:04:03	55	909	M	Adult	Fidji	33.5	32.8	35.5	Open	N/A	Sunny	Partially Away From The Sun	Partially Exposed	Moving	N/A	2022-08-02	16:00 - Sunset	Wet
16:04:58	121	909	M	Adult	Fidji	33.5	32.8	35.5	Open	N/A	Sunny	Partially Away From The Sun	Partially Exposed	Inactive	N/A	2022-08-02	16:00 - Sunset	Wet
16:06:59	36	909	M	Adult	Fidji	33.5	32.8	35.5	Open	N/A	Sunny	Partially Away From The Sun	Fully Exposed	Inactive	N/A	2022-08-02	16:00 - Sunset	Wet
16:07:35	109	909	M	Adult	Fidji	33.5	32.8	35.5	Open	N/A	Sunny	Towards The Sun	Fully Exposed	Vigilant	N/A	2022-08-02	16:00 - Sunset	Wet
16:09:24	27	909	M	Adult	Fidji	33.5	32.8	35.5	Open	N/A	Sunny	Partially Away From The Sun	Fully Exposed	Moving	N/A	2022-08-02	16:00 - Sunset	Wet
16:09:51	22	909	M	Adult	Fidji	33.5	32.8	35.5	Road	N/A	Sunny	Partially Away From The Sun	Fully Exposed	Moving	N/A	2022-08-02	16:00 - Sunset	Wet
16:10:13	148	909	M	Adult	Fidji	33.5	32.8	35.5	Road	N/A	Sunny	Partially Away From The Sun	Fully Exposed	Inactive	N/A	2022-08-02	16:00 - Sunset	Wet
16:12:41	42	909	M	Adult	Fidji	33.5	32.8	35.5	Open	N/A	Sunny	Towards The Sun	Partially Exposed	Inactive	N/A	2022-08-02	16:00 - Sunset	Wet
16:13:23	37	909	M	Adult	Fidji	33.5	32.8	35.5	Open	N/A	Sunny	Partially Away From The Sun	Fully Exposed	Inactive	N/A	2022-08-02	16:00 - Sunset	Wet
17:10:25	121	755	M	Sub-Adult	Flamenkuchen	33.5	32.8	35.5	Road	N/A	Sunny	Directly Away From The Sun	No Exposure	Vigilant	N/A	2022-08-02	16:00 - Sunset	Wet
17:12:26	384	755	M	Sub-Adult	Flamenkuchen	33.5	32.8	35.5	Road	N/A	Sunny	Directly Away From The Sun	Fully Exposed	Inactive	N/A	2022-08-02	16:00 - Sunset	Wet
17:18:50	232	755	M	Sub-Adult	Flamenkuchen	33.5	32.8	35.5	Open	N/A	Cloudy	Partially Away From The Sun	Cloudy Day	Moving	N/A	2022-08-02	16:00 - Sunset	Wet
17:22:42	18	755	M	Sub-Adult	Flamenkuchen	33.5	32.8	35.5	Open	N/A	Cloudy	Directly Away From The Sun	Cloudy Day	Moving	N/A	2022-08-02	16:00 - Sunset	Wet
16:16:46	122	854	F	Adult	Wolke	31.2	29.7	35.5	Road	N/A	Sunny	Partially Away From The Sun	No Exposure	Foraging	Leaves	2022-09-02	16:00 - Sunset	Wet
16:18:48	35	854	F	Adult	Wolke	31.2	29.7	35.5	Road	N/A	Cloudy	Towards The Sun	Cloudy Day	Foraging	Leaves	2022-09-02	16:00 - Sunset	Wet
16:19:23	53	854	F	Adult	Wolke	31.2	29.7	35.5	Road	N/A	Cloudy	Towards The Sun	Cloudy Day	Vigilant	N/A	2022-09-02	16:00 - Sunset	Wet
16:20:16	86	854	F	Adult	Wolke	31.2	29.7	35.5	Road	N/A	Cloudy	Towards The Sun	Cloudy Day	Foraging	Leaves	2022-09-02	16:00 - Sunset	Wet
16:21:42	191	854	F	Adult	Wolke	31.2	29.7	35.5	Road	N/A	Cloudy	Towards The Sun	Cloudy Day	Inactive	N/A	2022-09-02	16:00 - Sunset	Wet
16:24:53	367	854	F	Adult	Wolke	31.2	29.7	35.5	Road	N/A	Cloudy	Partially Away From The Sun	Cloudy Day	Inactive	N/A	2022-09-02	16:00 - Sunset	Wet
16:32:05	123	655	F	Adult	Emily	31.2	29.7	35.5	Road	N/A	Overcast	Partially Away From The Sun	Cloudy Day	Inactive	N/A	2022-09-02	16:00 - Sunset	Wet
16:34:08	391	655	F	Adult	Emily	31.2	29.7	35.5	Road	N/A	Overcast	Towards The Sun	Cloudy Day	Foraging	Leaves	2022-09-02	16:00 - Sunset	Wet
16:40:39	27	655	F	Adult	Emily	31.2	29.7	35.5	Road	N/A	Overcast	Directly Away From The Sun	Cloudy Day	Moving	N/A	2022-09-02	16:00 - Sunset	Wet
16:41:06	27	655	F	Adult	Emily	31.2	29.7	35.5	Road	N/A	Overcast	Directly Away From The Sun	Cloudy Day	Inactive	N/A	2022-09-02	16:00 - Sunset	Wet
16:41:33	87	655	F	Adult	Emily	31.2	29.7	35.5	Road	N/A	Overcast	Partially Away From The Sun	Cloudy Day	Vigilant	N/A	2022-09-02	16:00 - Sunset	Wet
16:45:29	26	811	M	Adult	Dark Male	31.2	29.7	35.5	Open	N/A	Overcast	Partially Away From The Sun	Cloudy Day	Inactive	N/A	2022-09-02	16:00 - Sunset	Wet
16:45:55	63	811	M	Adult	Dark Male	31.2	29.7	35.5	Road	N/A	Overcast	Directly Away From The Sun	Cloudy Day	Moving	N/A	2022-09-02	16:00 - Sunset	Wet
16:46:58	35	811	M	Adult	Dark Male	31.2	29.7	35.5	Road	N/A	Overcast	Directly Away From The Sun	Cloudy Day	Inactive	N/A	2022-09-02	16:00 - Sunset	Wet
16:47:33	20	811	M	Adult	Dark Male	31.2	29.7	35.5	Road	N/A	Overcast	Partially Away From The Sun	Cloudy Day	Inactive	N/A	2022-09-02	16:00 - Sunset	Wet
16:47:53	28	811	M	Adult	Dark Male	31.2	29.7	35.5	Road	N/A	Overcast	Directly Away From The Sun	Cloudy Day	Moving	N/A	2022-09-02	16:00 - Sunset	Wet
16:48:21	26	811	M	Adult	Dark Male	31.2	29.7	35.5	Road	N/A	Overcast	Partially Away From The Sun	Cloudy Day	Inactive	N/A	2022-09-02	16:00 - Sunset	Wet
16:48:47	107	811	M	Adult	Dark Male	31.2	29.7	35.5	Road	N/A	Overcast	Directly Away From The Sun	Cloudy Day	Moving	N/A	2022-09-02	16:00 - Sunset	Wet
16:50:34	24	811	M	Adult	Dark Male	31.2	29.7	35.5	Road	N/A	Overcast	Partially Away From The Sun	Cloudy Day	Inactive	N/A	2022-09-02	16:00 - Sunset	Wet
16:50:58	29	811	M	Adult	Dark Male	31.2	29.7	35.5	Road	N/A	Overcast	Directly Away From The Sun	Cloudy Day	Moving	N/A	2022-09-02	16:00 - Sunset	Wet
16:51:27	280	811	M	Adult	Dark Male	31.2	29.7	35.5	Road	N/A	Overcast	Partially Away From The Sun	Cloudy Day	Moving	N/A	2022-09-02	16:00 - Sunset	Wet
16:56:07	40	811	M	Adult	Dark Male	31.2	29.7	35.5	Road	N/A	Overcast	Towards The Sun	Cloudy Day	Moving	N/A	2022-09-02	16:00 - Sunset	Wet
16:56:47	22	811	M	Adult	Dark Male	31.2	29.7	35.5	Road	N/A	Overcast	Towards The Sun	Cloudy Day	Inactive	N/A	2022-09-02	16:00 - Sunset	Wet
16:57:09	28	811	M	Adult	Dark Male	31.2	29.7	35.5	Road	N/A	Overcast	Partially Away From The Sun	Cloudy Day	Moving	N/A	2022-09-02	16:00 - Sunset	Wet
16:57:37	83	811	M	Adult	Dark Male	31.2	29.7	35.5	Road	N/A	Overcast	Towards The Sun	Cloudy Day	Foraging	Leaves	2022-09-02	16:00 - Sunset	Wet
07:57:58	421	542	F	Adult	Shadow	23.7	30.4	33.2	Road	N/A	Sunny	Towards The Sun	No Exposure	Inactive	N/A	2022-10-02	Sunrise - 10:00	Wet
08:04:59	121	542	F	Adult	Shadow	23.7	30.4	33.2	Road	N/A	Sunny	Towards The Sun	No Exposure	Moving	N/A	2022-10-02	Sunrise - 10:00	Wet
08:09:57	355	603	M	Juvenile	Kaleb	23.7	30.4	33.2	Open	N/A	Sunny	Partially Away From The Sun	No Exposure	Foraging	Leaves	2022-10-02	Sunrise - 10:00	Wet
08:15:52	35	603	M	Juvenile	Kaleb	23.7	30.4	33.2	Open	N/A	Sunny	Partially Away From The Sun	Fully Exposed	Moving	N/A	2022-10-02	Sunrise - 10:00	Wet
08:16:27	44	603	M	Juvenile	Kaleb	23.7	30.4	33.2	Open	N/A	Sunny	Partially Away From The Sun	Partially Exposed	Inactive	N/A	2022-10-02	Sunrise - 10:00	Wet
08:17:11	181	603	M	Juvenile	Kaleb	23.7	30.4	33.2	Open	N/A	Sunny	Towards The Sun	Partially Exposed	Inactive	N/A	2022-10-02	Sunrise - 10:00	Wet
08:20:12	66	528	M	Juvenile	Marseilles	23.7	30.4	33.2	Open	N/A	Sunny	Partially Away From The Sun	Fully Exposed	Moving	N/A	2022-10-02	Sunrise - 10:00	Wet
08:21:18	23	528	M	Juvenile	Marseilles	23.7	30.4	33.2	Open	N/A	Sunny	Partially Away From The Sun	No Exposure	Inactive	N/A	2022-10-02	Sunrise - 10:00	Wet
08:21:41	64	528	M	Juvenile	Marseilles	23.7	30.4	33.2	Open	N/A	Sunny	Partially Away From The Sun	Fully Exposed	Moving	N/A	2022-10-02	Sunrise - 10:00	Wet
08:22:45	220	528	M	Juvenile	Marseilles	23.7	30.4	33.2	Open	N/A	Sunny	Partially Away From The Sun	Fully Exposed	Foraging	Leaves	2022-10-02	Sunrise - 10:00	Wet
08:26:25	42	528	M	Juvenile	Marseilles	23.7	30.4	33.2	Closed	N/A	Sunny	Partially Away From The Sun	Partially Exposed	Moving	N/A	2022-10-02	Sunrise - 10:00	Wet
08:27:07	38	528	M	Juvenile	Marseilles	23.7	30.4	33.2	Closed	N/A	Sunny	Partially Away From The Sun	Partially Exposed	Foraging	Leaves	2022-10-02	Sunrise - 10:00	Wet
08:27:45	75	528	M	Juvenile	Marseilles	23.7	30.4	33.2	Closed	N/A	Sunny	Partially Away From The Sun	Partially Exposed	Moving	N/A	2022-10-02	Sunrise - 10:00	Wet
17:33:34	5	681	M	Sub-Adult	Night	28	27.9	33.2	Road	N/A	Cloudy	Partially Away From The Sun	Cloudy Day	Inactive	N/A	2022-10-02	16:00 - Sunset	Wet
17:37:39	50	681	M	Sub-Adult	Night	28	27.9	33.2	Road	N/A	Cloudy	Partially Away From The Sun	Cloudy Day	Moving	N/A	2022-10-02	16:00 - Sunset	Wet
17:38:29	111	681	M	Sub-Adult	Night	28	27.9	33.2	Closed	N/A	Cloudy	Directly Away From The Sun	Cloudy Day	Vigilant	N/A	2022-10-02	16:00 - Sunset	Wet
17:40:20	36	681	M	Sub-Adult	Night	28	27.9	33.2	Closed	N/A	Cloudy	Directly Away From The Sun	Cloudy Day	Foraging	Leaves	2022-10-02	16:00 - Sunset	Wet
17:40:56	70	681	M	Sub-Adult	Night	28	27.9	33.2	Closed	N/A	Cloudy	Towards The Sun	Cloudy Day	Vigilant	N/A	2022-10-02	16:00 - Sunset	Wet
17:42:06	59	681	M	Sub-Adult	Night	28	27.9	33.2	Closed	N/A	Cloudy	Towards The Sun	Cloudy Day	Inactive	N/A	2022-10-02	16:00 - Sunset	Wet
17:43:05	50	681	M	Sub-Adult	Night	28	27.9	33.2	Closed	N/A	Cloudy	Directly Away From The Sun	Cloudy Day	Moving	N/A	2022-10-02	16:00 - Sunset	Wet
17:43:55	34	681	M	Sub-Adult	Night	28	27.9	33.2	Closed	N/A	Cloudy	Partially Away From The Sun	Cloudy Day	Vigilant	N/A	2022-10-02	16:00 - Sunset	Wet
17:44:29	31	681	M	Sub-Adult	Night	28	27.9	33.2	Closed	N/A	Cloudy	Directly Away From The Sun	Cloudy Day	Moving	N/A	2022-10-02	16:00 - Sunset	Wet
09:04:16	128	524	F	Adult	Noumea	22.2	28.5	33.8	Open	N/A	Sunny	Partially Away From The Sun	Fully Exposed	Foraging	Leaves	2022-11-02	Sunrise - 10:00	Wet
09:06:24	95	524	F	Adult	Noumea	22.2	28.5	33.8	Open	N/A	Sunny	Directly Away From The Sun	Fully Exposed	Foraging	Leaves	2022-11-02	Sunrise - 10:00	Wet
09:07:59	66	524	F	Adult	Noumea	22.2	28.5	33.8	Open	N/A	Sunny	Partially Away From The Sun	Fully Exposed	Moving	N/A	2022-11-02	Sunrise - 10:00	Wet
09:09:05	38	524	F	Adult	Noumea	22.2	28.5	33.8	Open	N/A	Sunny	Directly Away From The Sun	Fully Exposed	Inactive	N/A	2022-11-02	Sunrise - 10:00	Wet
09:09:43	61	524	F	Adult	Noumea	22.2	28.5	33.8	Open	N/A	Sunny	Partially Away From The Sun	Fully Exposed	Moving	N/A	2022-11-02	Sunrise - 10:00	Wet
09:10:44	68	524	F	Adult	Noumea	22.2	28.5	33.8	Open	N/A	Sunny	Partially Away From The Sun	Fully Exposed	Foraging	Leaves	2022-11-02	Sunrise - 10:00	Wet
09:11:52	68	524	F	Adult	Noumea	22.2	28.5	33.8	Open	N/A	Sunny	Towards The Sun	Partially Exposed	Foraging	Leaves	2022-11-02	Sunrise - 10:00	Wet
09:13:20	110	760	F	Adult	Nala	22.2	28.5	33.8	Open	N/A	Sunny	Towards The Sun	No Exposure	Foraging	Leaves	2022-11-02	Sunrise - 10:00	Wet
09:15:10	92	760	F	Adult	Nala	22.2	28.5	33.8	Open	N/A	Sunny	Partially Away From The Sun	Partially Exposed	Foraging	Leaves	2022-11-02	Sunrise - 10:00	Wet
09:16:42	71	760	F	Adult	Nala	22.2	28.5	33.8	Open	N/A	Sunny	Towards The Sun	Partially Exposed	Foraging	Leaves	2022-11-02	Sunrise - 10:00	Wet
09:17:53	31	760	F	Adult	Nala	22.2	28.5	33.8	Open	N/A	Sunny	Directly Away From The Sun	Partially Exposed	Inactive	N/A	2022-11-02	Sunrise - 10:00	Wet
09:18:24	338	760	F	Adult	Nala	22.2	28.5	33.8	Open	N/A	Sunny	Towards The Sun	No Exposure	Foraging	Leaves	2022-11-02	Sunrise - 10:00	Wet
09:24:02	38	760	F	Adult	Nala	22.2	28.5	33.8	Open	N/A	Sunny	Partially Away From The Sun	Fully Exposed	Moving	N/A	2022-11-02	Sunrise - 10:00	Wet
09:24:40	80	760	F	Adult	Nala	22.2	28.5	33.8	Open	N/A	Sunny	Directly Away From The Sun	Fully Exposed	Moving	N/A	2022-11-02	Sunrise - 10:00	Wet
09:26:06	99	894	M	Juvenile	Nairobi	22.2	28.5	33.8	Open	N/A	Sunny	Towards The Sun	Partially Exposed	Inactive	N/A	2022-11-02	Sunrise - 10:00	Wet
09:27:45	25	894	M	Juvenile	Nairobi	22.2	28.5	33.8	Open	N/A	Sunny	Partially Away From The Sun	No Exposure	Inactive	N/A	2022-11-02	Sunrise - 10:00	Wet
09:28:10	72	894	M	Juvenile	Nairobi	22.2	28.5	33.8	Open	N/A	Sunny	Partially Away From The Sun	No Exposure	Moving	N/A	2022-11-02	Sunrise - 10:00	Wet
09:29:22	56	894	M	Juvenile	Nairobi	22.2	28.5	33.8	Open	N/A	Sunny	Partially Away From The Sun	Fully Exposed	Foraging	Leaves	2022-11-02	Sunrise - 10:00	Wet
09:30:18	84	894	M	Juvenile	Nairobi	22.2	28.5	33.8	Open	N/A	Sunny	Towards The Sun	Partially Exposed	Foraging	Leaves	2022-11-02	Sunrise - 10:00	Wet
09:31:42	25	894	M	Juvenile	Nairobi	22.2	28.5	33.8	Open	N/A	Sunny	Directly Away From The Sun	Fully Exposed	Moving	N/A	2022-11-02	Sunrise - 10:00	Wet
09:32:07	21	894	M	Juvenile	Nairobi	22.2	28.5	33.8	Open	N/A	Sunny	Partially Away From The Sun	Fully Exposed	Moving	N/A	2022-11-02	Sunrise - 10:00	Wet
09:32:28	34	894	M	Juvenile	Nairobi	22.2	28.5	33.8	Open	N/A	Sunny	Partially Away From The Sun	Fully Exposed	Foraging	Leaves	2022-11-02	Sunrise - 10:00	Wet
09:33:02	54	894	M	Juvenile	Nairobi	22.2	28.5	33.8	Open	N/A	Sunny	Directly Away From The Sun	Fully Exposed	Moving	N/A	2022-11-02	Sunrise - 10:00	Wet
09:33:56	127	894	M	Juvenile	Nairobi	22.2	28.5	33.8	Open	N/A	Sunny	Directly Away From The Sun	Fully Exposed	Inactive	N/A	2022-11-02	Sunrise - 10:00	Wet
09:36:03	14	894	M	Juvenile	Nairobi	22.2	28.5	33.8	Open	N/A	Sunny	Directly Away From The Sun	No Exposure	Inactive	N/A	2022-11-02	Sunrise - 10:00	Wet
09:39:17	103	894	M	Juvenile	Nairobi	22.2	28.5	33.8	Open	N/A	Sunny	Partially Away From The Sun	No Exposure	Inactive	N/A	2022-11-02	Sunrise - 10:00	Wet
16:19:12	213	648	M	Juvenile	Banana	33	32.1	33.8	Open	N/A	Cloudy	Partially Away From The Sun	Cloudy Day	Foraging	Leaves	2022-11-02	16:00 - Sunset	Wet
16:22:45	81	648	M	Juvenile	Banana	33	32.1	33.8	Open	N/A	Cloudy	Directly Away From The Sun	Cloudy Day	Foraging	Leaves	2022-11-02	16:00 - Sunset	Wet
16:24:06	27	648	M	Juvenile	Banana	33	32.1	33.8	Open	N/A	Cloudy	Partially Away From The Sun	Cloudy Day	Moving	N/A	2022-11-02	16:00 - Sunset	Wet
16:24:33	118	648	M	Juvenile	Banana	33	32.1	33.8	Open	N/A	Cloudy	Directly Away From The Sun	Cloudy Day	Foraging	Leaves	2022-11-02	16:00 - Sunset	Wet
16:26:31	202	648	M	Juvenile	Banana	33	32.1	33.8	Open	N/A	Cloudy	Partially Away From The Sun	Cloudy Day	Foraging	Leaves	2022-11-02	16:00 - Sunset	Wet
16:29:53	7	648	M	Juvenile	Banana	33	32.1	33.8	Open	N/A	Cloudy	Partially Away From The Sun	Cloudy Day	Moving	N/A	2022-11-02	16:00 - Sunset	Wet
16:30:50	254	680	M	Sub-Adult	Night	33	32.1	33.8	Open	N/A	Cloudy	Partially Away From The Sun	Cloudy Day	Inactive	N/A	2022-11-02	16:00 - Sunset	Wet
16:35:04	28	680	M	Sub-Adult	Night	33	32.1	33.8	Open	N/A	Cloudy	Partially Away From The Sun	Cloudy Day	Moving	N/A	2022-11-02	16:00 - Sunset	Wet
16:35:32	316	680	M	Sub-Adult	Night	33	32.1	33.8	Open	N/A	Cloudy	Towards The Sun	Cloudy Day	Inactive	N/A	2022-11-02	16:00 - Sunset	Wet
16:40:48	33	680	M	Sub-Adult	Night	33	32.1	33.8	Open	N/A	Cloudy	Partially Away From The Sun	Cloudy Day	Inactive	N/A	2022-11-02	16:00 - Sunset	Wet
16:41:21	49	680	M	Sub-Adult	Night	33	32.1	33.8	Open	N/A	Cloudy	Partially Away From The Sun	Cloudy Day	Moving	N/A	2022-11-02	16:00 - Sunset	Wet
16:42:13	375	887	M	Adult	Kevin	33	32.1	33.8	Open	N/A	Sunny	Directly Away From The Sun	Partially Exposed	Foraging	Leaves	2022-11-02	16:00 - Sunset	Wet
16:50:28	28	887	M	Adult	Kevin	33	32.1	33.8	Open	N/A	Sunny	Towards The Sun	Fully Exposed	Moving	N/A	2022-11-02	16:00 - Sunset	Wet
16:50:56	18	887	M	Adult	Kevin	33	32.1	33.8	Open	N/A	Sunny	Partially Away From The Sun	Fully Exposed	Foraging	Leaves	2022-11-02	16:00 - Sunset	Wet
16:51:14	40	887	M	Adult	Kevin	33	32.1	33.8	Open	N/A	Sunny	Towards The Sun	Fully Exposed	Moving	N/A	2022-11-02	16:00 - Sunset	Wet
16:51:54	54	887	M	Adult	Kevin	33	32.1	33.8	Open	N/A	Sunny	Partially Away From The Sun	Fully Exposed	Moving	N/A	2022-11-02	16:00 - Sunset	Wet
16:52:48	28	887	M	Adult	Kevin	33	32.1	33.8	Open	N/A	Sunny	Directly Away From The Sun	Fully Exposed	Inactive	N/A	2022-11-02	16:00 - Sunset	Wet
16:53:16	22	887	M	Adult	Kevin	33	32.1	33.8	Open	N/A	Sunny	Partially Away From The Sun	Fully Exposed	Inactive	N/A	2022-11-02	16:00 - Sunset	Wet
16:53:38	30	887	M	Adult	Kevin	33	32.1	33.8	Open	N/A	Sunny	Directly Away From The Sun	Fully Exposed	Moving	N/A	2022-11-02	16:00 - Sunset	Wet
16:54:08	26	887	M	Adult	Kevin	33	32.1	33.8	Open	N/A	Sunny	Partially Away From The Sun	Fully Exposed	Moving	N/A	2022-11-02	16:00 - Sunset	Wet
16:54:34	31	887	M	Adult	Kevin	33	32.1	33.8	Open	N/A	Sunny	Towards The Sun	Fully Exposed	Moving	N/A	2022-11-02	16:00 - Sunset	Wet
16:55:05	115	887	M	Adult	Kevin	33	32.1	33.8	Open	N/A	Sunny	Directly Away From The Sun	Fully Exposed	Inactive	N/A	2022-11-02	16:00 - Sunset	Wet
07:23:55	49	365	F	Adult	Sahara	24.8	27.5	32.3	Road	N/A	Sunny	Partially Away From The Sun	Fully Exposed	Vigilant	N/A	02/15/2022	Sunrise - 10:00	Wet
07:24:44	36	365	F	Adult	Sahara	24.8	27.5	32.3	Open	N/A	Sunny	Towards The Sun	Fully Exposed	Moving	N/A	02/15/2022	Sunrise - 10:00	Wet
07:25:20	31	365	F	Adult	Sahara	24.8	27.5	32.3	Open	N/A	Sunny	Towards The Sun	Partially Exposed	Foraging	Leaves	02/15/2022	Sunrise - 10:00	Wet
07:25:51	33	365	F	Adult	Sahara	24.8	27.5	32.3	Open	N/A	Sunny	Partially Away From The Sun	Fully Exposed	Moving	N/A	02/15/2022	Sunrise - 10:00	Wet
07:26:24	63	365	F	Adult	Sahara	24.8	27.5	32.3	Road	N/A	Sunny	Partially Away From The Sun	Partially Exposed	Inactive	N/A	02/15/2022	Sunrise - 10:00	Wet
07:27:27	83	365	F	Adult	Sahara	24.8	27.5	32.3	Road	N/A	Sunny	Partially Away From The Sun	No Exposure	Inactive	N/A	02/15/2022	Sunrise - 10:00	Wet
07:28:50	10	365	F	Adult	Sahara	24.8	27.5	32.3	Closed	N/A	Sunny	Directly Away From The Sun	Partially Exposed	Moving	N/A	02/15/2022	Sunrise - 10:00	Wet
07:29:53	93	607	F	Adult	Sahara	24.8	27.5	32.3	Road	N/A	Sunny	Partially Away From The Sun	No Exposure	Inactive	N/A	02/15/2022	Sunrise - 10:00	Wet
07:31:26	58	607	F	Adult	Sahara	24.8	27.5	32.3	Closed	N/A	Sunny	Partially Away From The Sun	Partially Exposed	Moving	N/A	02/15/2022	Sunrise - 10:00	Wet
07:32:24	25	607	F	Adult	Sahara	24.8	27.5	32.3	Closed	N/A	Sunny	Directly Away From The Sun	Partially Exposed	Inactive	N/A	02/15/2022	Sunrise - 10:00	Wet
07:32:49	215	607	F	Adult	Sahara	24.8	27.5	32.3	Closed	N/A	Sunny	Partially Away From The Sun	Fully Exposed	Inactive	N/A	02/15/2022	Sunrise - 10:00	Wet
07:36:24	43	607	F	Adult	Sahara	24.8	27.5	32.3	Closed	N/A	Sunny	Directly Away From The Sun	Partially Exposed	Inactive	N/A	02/15/2022	Sunrise - 10:00	Wet
07:37:07	23	607	F	Adult	Sahara	24.8	27.5	32.3	Closed	N/A	Sunny	Partially Away From The Sun	Partially Exposed	Moving	N/A	02/15/2022	Sunrise - 10:00	Wet
07:37:30	38	607	F	Adult	Sahara	24.8	27.5	32.3	Closed	N/A	Sunny	Towards The Sun	Partially Exposed	Moving	N/A	02/15/2022	Sunrise - 10:00	Wet
07:38:08	31	607	F	Adult	Sahara	24.8	27.5	32.3	Closed	N/A	Sunny	Directly Away From The Sun	Partially Exposed	Inactive	N/A	02/15/2022	Sunrise - 10:00	Wet
07:38:39	21	607	F	Adult	Sahara	24.8	27.5	32.3	Closed	N/A	Sunny	Directly Away From The Sun	Fully Exposed	Moving	N/A	02/15/2022	Sunrise - 10:00	Wet
07:40:56	27	544	M	Adult	Lovely	24.8	27.5	32.3	Closed	N/A	Sunny	Partially Away From The Sun	Partially Exposed	Foraging	Leaves	02/15/2022	Sunrise - 10:00	Wet
07:41:23	27	544	M	Adult	Lovely	24.8	27.5	32.3	Closed	N/A	Sunny	Directly Away From The Sun	Fully Exposed	Moving	N/A	02/15/2022	Sunrise - 10:00	Wet
07:41:50	32	544	M	Adult	Lovely	24.8	27.5	32.3	Closed	N/A	Sunny	Directly Away From The Sun	Partially Exposed	Foraging	Leaves	02/15/2022	Sunrise - 10:00	Wet
07:42:22	32	544	M	Adult	Lovely	24.8	27.5	32.3	Closed	N/A	Sunny	Partially Away From The Sun	Partially Exposed	Moving	N/A	02/15/2022	Sunrise - 10:00	Wet
07:42:54	30	544	M	Adult	Lovely	24.8	27.5	32.3	Closed	N/A	Sunny	Partially Away From The Sun	Partially Exposed	Foraging	Leaves	02/15/2022	Sunrise - 10:00	Wet
07:43:24	23	544	M	Adult	Lovely	24.8	27.5	32.3	Closed	N/A	Sunny	Directly Away From The Sun	Partially Exposed	Foraging	Leaves	02/15/2022	Sunrise - 10:00	Wet
07:43:47	29	544	M	Adult	Lovely	24.8	27.5	32.3	Closed	N/A	Sunny	Partially Away From The Sun	Fully Exposed	Moving	N/A	02/15/2022	Sunrise - 10:00	Wet
07:44:16	29	544	M	Adult	Lovely	24.8	27.5	32.3	Closed	N/A	Sunny	Towards The Sun	Fully Exposed	Moving	N/A	02/15/2022	Sunrise - 10:00	Wet
07:44:45	96	544	M	Adult	Lovely	24.8	27.5	32.3	Closed	N/A	Sunny	Towards The Sun	No Exposure	Foraging	Leaves	02/15/2022	Sunrise - 10:00	Wet
07:46:21	25	544	M	Adult	Lovely	24.8	27.5	32.3	Closed	N/A	Sunny	Towards The Sun	Partially Exposed	Inactive	N/A	02/15/2022	Sunrise - 10:00	Wet
07:46:46	126	544	M	Adult	Lovely	24.8	27.5	32.3	Closed	N/A	Sunny	Partially Away From The Sun	Partially Exposed	Foraging	Leaves	02/15/2022	Sunrise - 10:00	Wet
07:48:52	22	544	M	Adult	Lovely	24.8	27.5	32.3	Closed	N/A	Sunny	Directly Away From The Sun	Partially Exposed	Inactive	N/A	02/15/2022	Sunrise - 10:00	Wet
07:49:14	46	544	M	Adult	Lovely	24.8	27.5	32.3	Closed	N/A	Sunny	Directly Away From The Sun	Fully Exposed	Interacting	N/A	02/15/2022	Sunrise - 10:00	Wet
16:12:09	208	891	M	Adult	Kevin	31.7	29.8	32.3	Road	None	Sunny	Partially Away From The Sun	Partially Exposed	Moving	N/A	02/15/2022	16:00 - Sunset	Wet
16:15:37	136	891	M	Adult	Kevin	31.7	29.8	32.3	Open	N/A	Sunny	Towards The Sun	Partially Exposed	Foraging	Leaves	02/15/2022	16:00 - Sunset	Wet
16:17:53	36	891	M	Adult	Kevin	31.7	29.8	32.3	Open	N/A	Sunny	Towards The Sun	Partially Exposed	Moving	N/A	02/15/2022	16:00 - Sunset	Wet
16:18:29	31	891	M	Adult	Kevin	31.7	29.8	32.3	Open	N/A	Sunny	Towards The Sun	No Exposure	Foraging	Leaves	02/15/2022	16:00 - Sunset	Wet
16:19:00	32	891	M	Adult	Kevin	31.7	29.8	32.3	Open	N/A	Cloudy	Towards The Sun	Cloudy Day	Moving	N/A	02/15/2022	16:00 - Sunset	Wet
16:19:32	44	891	M	Adult	Kevin	31.7	29.8	32.3	Open	N/A	Cloudy	Towards The Sun	Cloudy Day	Foraging	Leaves	02/15/2022	16:00 - Sunset	Wet
16:20:16	71	891	M	Adult	Kevin	31.7	29.8	32.3	Open	N/A	Cloudy	Partially Away From The Sun	Cloudy Day	Foraging	Leaves	02/15/2022	16:00 - Sunset	Wet
16:21:27	29	891	M	Adult	Kevin	31.7	29.8	32.3	Open	N/A	Cloudy	Partially Away From The Sun	Cloudy Day	Moving	N/A	02/15/2022	16:00 - Sunset	Wet
16:21:56	23	891	M	Adult	Kevin	31.7	29.8	32.3	Open	N/A	Cloudy	Partially Away From The Sun	Cloudy Day	Foraging	Leaves	02/15/2022	16:00 - Sunset	Wet
16:22:19	53	891	M	Adult	Kevin	31.7	29.8	32.3	Open	N/A	Cloudy	Directly Away From The Sun	Cloudy Day	Inactive	N/A	02/15/2022	16:00 - Sunset	Wet
16:23:12	22	891	M	Adult	Kevin	31.7	29.8	32.3	Open	N/A	Cloudy	Partially Away From The Sun	Cloudy Day	Moving	N/A	02/15/2022	16:00 - Sunset	Wet
16:23:34	202	891	M	Adult	Kevin	31.7	29.8	32.3	Open	N/A	Cloudy	Partially Away From The Sun	Cloudy Day	Foraging	Leaves	02/15/2022	16:00 - Sunset	Wet
16:26:56	4	891	M	Adult	Kevin	31.7	29.8	32.3	Closed	N/A	Sunny	Partially Away From The Sun	No Exposure	Moving	N/A	02/15/2022	16:00 - Sunset	Wet
17:17:39	80	621	F	Adult	Berthille	31.7	29.8	32.3	Open	N/A	Sunny	Partially Away From The Sun	Partially Exposed	Inactive	N/A	02/15/2022	16:00 - Sunset	Wet
17:18:59	22	621	F	Adult	Berthille	31.7	29.8	32.3	Open	N/A	Sunny	Partially Away From The Sun	Partially Exposed	Moving	N/A	02/15/2022	16:00 - Sunset	Wet
17:19:21	130	621	F	Adult	Berthille	31.7	29.8	32.3	Open	N/A	Sunny	Towards The Sun	Partially Exposed	Inactive	N/A	02/15/2022	16:00 - Sunset	Wet
17:21:31	29	621	F	Adult	Berthille	31.7	29.8	32.3	Open	N/A	Sunny	Partially Away From The Sun	Fully Exposed	Moving	N/A	02/15/2022	16:00 - Sunset	Wet
17:22:00	92	621	F	Adult	Berthille	31.7	29.8	32.3	Open	N/A	Cloudy	Towards The Sun	Cloudy Day	Inactive	N/A	02/15/2022	16:00 - Sunset	Wet
17:23:32	48	621	F	Adult	Berthille	31.7	29.8	32.3	Open	N/A	Cloudy	Towards The Sun	Cloudy Day	Moving	N/A	02/15/2022	16:00 - Sunset	Wet
17:24:20	141	621	F	Adult	Berthille	31.7	29.8	32.3	Open	N/A	Sunny	Partially Away From The Sun	Fully Exposed	Inactive	N/A	02/15/2022	16:00 - Sunset	Wet
17:26:41	79	621	F	Adult	Berthille	31.7	29.8	32.3	Open	N/A	Sunny	Towards The Sun	Fully Exposed	Inactive	N/A	02/15/2022	16:00 - Sunset	Wet
17:29:32	67	508	M	Juvenile	Banana	31.7	29.8	32.3	Open	N/A	Sunny	Partially Away From The Sun	Partially Exposed	Inactive	N/A	02/15/2022	16:00 - Sunset	Wet
17:30:39	25	508	M	Juvenile	Banana	31.7	29.8	32.3	Open	N/A	Sunny	Towards The Sun	Partially Exposed	Moving	N/A	02/15/2022	16:00 - Sunset	Wet
17:31:04	74	508	M	Juvenile	Banana	31.7	29.8	32.3	Open	N/A	Sunny	Directly Away From The Sun	Fully Exposed	Vigilant	N/A	02/15/2022	16:00 - Sunset	Wet
17:32:18	24	508	M	Juvenile	Banana	31.7	29.8	32.3	Open	N/A	Sunny	Partially Away From The Sun	Fully Exposed	Moving	N/A	02/15/2022	16:00 - Sunset	Wet
17:32:42	122	508	M	Juvenile	Banana	31.7	29.8	32.3	Open	N/A	Sunny	Partially Away From The Sun	Fully Exposed	Foraging	Leaves	02/15/2022	16:00 - Sunset	Wet
17:34:44	63	508	M	Juvenile	Banana	31.7	29.8	32.3	Open	N/A	Sunny	Towards The Sun	Fully Exposed	Moving	N/A	02/15/2022	16:00 - Sunset	Wet
17:35:47	68	508	M	Juvenile	Banana	31.7	29.8	32.3	Open	N/A	Sunny	Partially Away From The Sun	Fully Exposed	Vigilant	N/A	02/15/2022	16:00 - Sunset	Wet
17:36:55	26	508	M	Juvenile	Banana	31.7	29.8	32.3	Open	N/A	Sunny	Partially Away From The Sun	Fully Exposed	Moving	N/A	02/15/2022	16:00 - Sunset	Wet
17:37:21	39	508	M	Juvenile	Banana	31.7	29.8	32.3	Open	N/A	Sunny	Partially Away From The Sun	Partially Exposed	Inactive	N/A	02/15/2022	16:00 - Sunset	Wet
16:22:10	93	270	F	Adult	Flower	34.1	32.4	34.1	Open	N/A	Sunny	Towards The Sun	Partially Exposed	Vigilant	N/A	02/16/2022	16:00 - Sunset	Wet
16:23:43	29	270	F	Adult	Flower	34.1	32.4	34.1	Open	N/A	Sunny	Partially Away From The Sun	Fully Exposed	Moving	N/A	02/16/2022	16:00 - Sunset	Wet
16:24:12	83	270	F	Adult	Flower	34.1	32.4	34.1	Closed	N/A	Sunny	Towards The Sun	Partially Exposed	Moving	N/A	02/16/2022	16:00 - Sunset	Wet
16:25:35	48	270	F	Adult	Flower	34.1	32.4	34.1	Closed	N/A	Sunny	Towards The Sun	Partially Exposed	Inactive	N/A	02/16/2022	16:00 - Sunset	Wet
16:26:23	37	270	F	Adult	Flower	34.1	32.4	34.1	Closed	N/A	Sunny	Towards The Sun	Partially Exposed	Moving	N/A	02/16/2022	16:00 - Sunset	Wet
16:28:48	26	552	M	Adult	Forest	34.1	32.4	34.1	Open	N/A	Sunny	Directly Away From The Sun	Fully Exposed	Moving	N/A	02/16/2022	16:00 - Sunset	Wet
16:29:14	34	552	M	Adult	Forest	34.1	32.4	34.1	Closed	N/A	Sunny	Partially Away From The Sun	Fully Exposed	Vigilant	N/A	02/16/2022	16:00 - Sunset	Wet
16:29:48	372	552	M	Adult	Forest	34.1	32.4	34.1	Closed	N/A	Sunny	Towards The Sun	Fully Exposed	Vigilant	N/A	02/16/2022	16:00 - Sunset	Wet
16:36:00	64	552	M	Adult	Forest	34.1	32.4	34.1	Closed	N/A	Cloudy	Directly Away From The Sun	Cloudy Day	Vigilant	N/A	02/16/2022	16:00 - Sunset	Wet
16:37:04	56	552	M	Adult	Forest	34.1	32.4	34.1	Closed	N/A	Cloudy	Partially Away From The Sun	Cloudy Day	Moving	N/A	02/16/2022	16:00 - Sunset	Wet
17:09:23	74	517	M	Adult	Sun	34.1	32.4	34.1	Road	N/A	Sunny	Directly Away From The Sun	Partially Exposed	Moving	N/A	02/16/2022	16:00 - Sunset	Wet
17:10:37	78	517	M	Adult	Sun	34.1	32.4	34.1	Closed	N/A	Sunny	Directly Away From The Sun	Partially Exposed	Moving	N/A	02/16/2022	16:00 - Sunset	Wet
17:11:55	27	517	M	Adult	Sun	34.1	32.4	34.1	Closed	N/A	Sunny	Partially Away From The Sun	Partially Exposed	Foraging	Leaves	02/16/2022	16:00 - Sunset	Wet
17:12:22	227	517	M	Adult	Sun	34.1	32.4	34.1	Closed	N/A	Sunny	Directly Away From The Sun	Partially Exposed	Moving	N/A	02/16/2022	16:00 - Sunset	Wet
17:16:09	29	517	M	Adult	Sun	34.1	32.4	34.1	Closed	N/A	Sunny	Towards The Sun	Partially Exposed	Inactive	N/A	02/16/2022	16:00 - Sunset	Wet
17:16:38	82	517	M	Adult	Sun	34.1	32.4	34.1	Closed	N/A	Sunny	Towards The Sun	Partially Exposed	Moving	N/A	02/16/2022	16:00 - Sunset	Wet
07:32:16	31	644	M	Adult	Melman	22.9	29.7	34.8	Closed	N/A	Sunny	Directly Away From The Sun	Partially Exposed	Moving	N/A	02/17/2022	Sunrise - 10:00	Wet
07:32:47	59	644	M	Adult	Melman	22.9	29.7	34.8	Closed	N/A	Sunny	Directly Away From The Sun	Partially Exposed	Inactive	N/A	02/17/2022	Sunrise - 10:00	Wet
07:33:46	95	644	M	Adult	Melman	22.9	29.7	34.8	Open	N/A	Sunny	Directly Away From The Sun	Fully Exposed	Moving	N/A	02/17/2022	Sunrise - 10:00	Wet
07:35:21	49	644	M	Adult	Melman	22.9	29.7	34.8	Open	N/A	Sunny	Directly Away From The Sun	Fully Exposed	Inactive	N/A	02/17/2022	Sunrise - 10:00	Wet
07:36:10	20	644	M	Adult	Melman	22.9	29.7	34.8	Open	N/A	Sunny	Directly Away From The Sun	Fully Exposed	Moving	N/A	02/17/2022	Sunrise - 10:00	Wet
07:36:30	49	644	M	Adult	Melman	22.9	29.7	34.8	Open	N/A	Sunny	Partially Away From The Sun	Fully Exposed	Moving	N/A	02/17/2022	Sunrise - 10:00	Wet
07:37:19	55	644	M	Adult	Melman	22.9	29.7	34.8	Open	N/A	Sunny	Partially Away From The Sun	Fully Exposed	Inactive	N/A	02/17/2022	Sunrise - 10:00	Wet
07:38:14	30	644	M	Adult	Melman	22.9	29.7	34.8	Open	N/A	Sunny	Partially Away From The Sun	Fully Exposed	Moving	N/A	02/17/2022	Sunrise - 10:00	Wet
07:38:44	112	644	M	Adult	Melman	22.9	29.7	34.8	Open	N/A	Sunny	Directly Away From The Sun	Fully Exposed	Inactive	N/A	02/17/2022	Sunrise - 10:00	Wet
07:40:36	67	644	M	Adult	Melman	22.9	29.7	34.8	Open	N/A	Sunny	Directly Away From The Sun	Fully Exposed	Moving	N/A	02/17/2022	Sunrise - 10:00	Wet
07:41:43	23	644	M	Adult	Melman	22.9	29.7	34.8	Open	N/A	Sunny	Directly Away From The Sun	Partially Exposed	Inactive	N/A	02/17/2022	Sunrise - 10:00	Wet
07:42:06	54	644	M	Adult	Melman	22.9	29.7	34.8	Open	N/A	Sunny	Directly Away From The Sun	Fully Exposed	Moving	N/A	02/17/2022	Sunrise - 10:00	Wet
07:44:37	73	623	F	Adult	Eden	22.9	29.7	34.8	Open	N/A	Sunny	Towards The Sun	Fully Exposed	Vigilant	N/A	02/17/2022	Sunrise - 10:00	Wet
07:45:50	20	623	F	Adult	Eden	22.9	29.7	34.8	Open	N/A	Sunny	Partially Away From The Sun	Fully Exposed	Moving	N/A	02/17/2022	Sunrise - 10:00	Wet
07:46:10	76	623	F	Adult	Eden	22.9	29.7	34.8	Open	N/A	Sunny	Towards The Sun	Fully Exposed	Vigilant	N/A	02/17/2022	Sunrise - 10:00	Wet
07:47:26	20	623	F	Adult	Eden	22.9	29.7	34.8	Open	N/A	Sunny	Directly Away From The Sun	Fully Exposed	Vigilant	N/A	02/17/2022	Sunrise - 10:00	Wet
07:47:46	71	623	F	Adult	Eden	22.9	29.7	34.8	Open	N/A	Sunny	Partially Away From The Sun	Fully Exposed	Moving	N/A	02/17/2022	Sunrise - 10:00	Wet
07:48:57	27	623	F	Adult	Eden	22.9	29.7	34.8	Open	N/A	Sunny	Directly Away From The Sun	Fully Exposed	Inactive	N/A	02/17/2022	Sunrise - 10:00	Wet
07:49:24	21	623	F	Adult	Eden	22.9	29.7	34.8	Open	N/A	Sunny	Partially Away From The Sun	Fully Exposed	Vigilant	N/A	02/17/2022	Sunrise - 10:00	Wet
07:49:45	44	623	F	Adult	Eden	22.9	29.7	34.8	Open	N/A	Sunny	Directly Away From The Sun	Fully Exposed	Inactive	N/A	02/17/2022	Sunrise - 10:00	Wet
07:50:29	41	623	F	Adult	Eden	22.9	29.7	34.8	Open	N/A	Sunny	Partially Away From The Sun	Fully Exposed	Moving	N/A	02/17/2022	Sunrise - 10:00	Wet
07:51:10	27	623	F	Adult	Eden	22.9	29.7	34.8	Open	N/A	Sunny	Directly Away From The Sun	Partially Exposed	Vigilant	N/A	02/17/2022	Sunrise - 10:00	Wet
07:51:37	21	623	F	Adult	Eden	22.9	29.7	34.8	Open	N/A	Sunny	Partially Away From The Sun	Fully Exposed	Moving	N/A	02/17/2022	Sunrise - 10:00	Wet
07:51:58	143	623	F	Adult	Eden	22.9	29.7	34.8	Open	N/A	Sunny	Partially Away From The Sun	Fully Exposed	Inactive	N/A	02/17/2022	Sunrise - 10:00	Wet
07:54:21	39	623	F	Adult	Eden	22.9	29.7	34.8	Open	N/A	Sunny	Directly Away From The Sun	Partially Exposed	Inactive	N/A	02/17/2022	Sunrise - 10:00	Wet
08:41:49	636	791	M	Adult	McFly	22.9	29.7	34.8	Road	N/A	Sunny	Towards The Sun	Partially Exposed	Inactive	N/A	02/17/2022	Sunrise - 10:00	Wet
08:53:25	155	791	M	Adult	McFly	22.9	29.7	34.8	Road	N/A	Sunny	Towards The Sun	No Exposure	Inactive	N/A	02/17/2022	Sunrise - 10:00	Wet
16:16:04	435	896	M	Adult	Sun	34	31.2	34.8	Road	N/A	Cloudy	Towards The Sun	Cloudy Day	Foraging	Leaves	02/17/2022	16:00 - Sunset	Wet
16:23:19	60	896	M	Adult	Sun	34	31.2	34.8	Road	N/A	Cloudy	Partially Away From The Sun	Cloudy Day	Moving	N/A	02/17/2022	16:00 - Sunset	Wet
16:24:19	120	896	M	Adult	Sun	34	31.2	34.8	Open	N/A	Cloudy	Partially Away From The Sun	Cloudy Day	Foraging	Leaves	02/17/2022	16:00 - Sunset	Wet
16:26:19	41	896	M	Adult	Sun	34	31.2	34.8	Open	N/A	Cloudy	Towards The Sun	Cloudy Day	Foraging	Leaves	02/17/2022	16:00 - Sunset	Wet
16:27:00	168	896	M	Adult	Sun	34	31.2	34.8	Open	N/A	Cloudy	Partially Away From The Sun	Cloudy Day	Foraging	Leaves	02/17/2022	16:00 - Sunset	Wet
16:29:48	40	896	M	Adult	Sun	34	31.2	34.8	Open	N/A	Sunny	Partially Away From The Sun	Partially Exposed	Foraging	Leaves	02/17/2022	16:00 - Sunset	Wet
16:30:28	32	896	M	Adult	Sun	34	31.2	34.8	Open	N/A	Sunny	Directly Away From The Sun	Partially Exposed	Foraging	Leaves	02/17/2022	16:00 - Sunset	Wet
16:35:25	149	515	F	Adult	Flower	34	31.2	34.8	Closed	N/A	Sunny	Partially Away From The Sun	Partially Exposed	Inactive	N/A	02/17/2022	16:00 - Sunset	Wet
16:37:54	25	515	F	Adult	Flower	34	31.2	34.8	Closed	N/A	Sunny	Partially Away From The Sun	Partially Exposed	Moving	N/A	02/17/2022	16:00 - Sunset	Wet
16:38:19	85	515	F	Adult	Flower	34	31.2	34.8	Closed	N/A	Sunny	Partially Away From The Sun	Partially Exposed	Foraging	Leaves	02/17/2022	16:00 - Sunset	Wet
16:39:44	21	515	F	Adult	Flower	34	31.2	34.8	Closed	N/A	Sunny	Partially Away From The Sun	Partially Exposed	Moving	N/A	02/17/2022	16:00 - Sunset	Wet
16:40:05	235	515	F	Adult	Flower	34	31.2	34.8	Closed	N/A	Sunny	Partially Away From The Sun	No Exposure	Foraging	Leaves	02/17/2022	16:00 - Sunset	Wet
16:44:14	45	886	M	Adult	Forest	34	31.2	34.8	Closed	N/A	Sunny	Partially Away From The Sun	Partially Exposed	Moving	N/A	02/17/2022	16:00 - Sunset	Wet
16:44:59	34	886	M	Adult	Forest	34	31.2	34.8	Closed	N/A	Sunny	Partially Away From The Sun	No Exposure	Inactive	N/A	02/17/2022	16:00 - Sunset	Wet
16:45:33	30	886	M	Adult	Forest	34	31.2	34.8	Closed	N/A	Sunny	Partially Away From The Sun	Partially Exposed	Moving	N/A	02/17/2022	16:00 - Sunset	Wet
16:46:03	36	886	M	Adult	Forest	34	31.2	34.8	Closed	N/A	Sunny	Directly Away From The Sun	Partially Exposed	Moving	N/A	02/17/2022	16:00 - Sunset	Wet
16:46:39	121	886	M	Adult	Forest	34	31.2	34.8	Closed	N/A	Sunny	Directly Away From The Sun	Partially Exposed	Inactive	N/A	02/17/2022	16:00 - Sunset	Wet
16:48:40	38	886	M	Adult	Forest	34	31.2	34.8	Closed	N/A	Sunny	Partially Away From The Sun	Partially Exposed	Moving	N/A	02/17/2022	16:00 - Sunset	Wet
16:49:18	33	886	M	Adult	Forest	34	31.2	34.8	Closed	N/A	Sunny	Partially Away From The Sun	Partially Exposed	Inactive	N/A	02/17/2022	16:00 - Sunset	Wet
16:49:51	32	886	M	Adult	Forest	34	31.2	34.8	Closed	N/A	Sunny	Towards The Sun	Partially Exposed	Moving	N/A	02/17/2022	16:00 - Sunset	Wet
16:50:23	99	886	M	Adult	Forest	34	31.2	34.8	Closed	N/A	Sunny	Towards The Sun	Partially Exposed	Foraging	Leaves	02/17/2022	16:00 - Sunset	Wet
16:52:02	32	886	M	Adult	Forest	34	31.2	34.8	Closed	N/A	Rainy	Towards The Sun	Partially Exposed	Moving	N/A	02/17/2022	16:00 - Sunset	Wet
16:52:34	58	886	M	Adult	Forest	34	31.2	34.8	Closed	N/A	Rainy	Partially Away From The Sun	Partially Exposed	Foraging	Leaves	02/17/2022	16:00 - Sunset	Wet
16:53:32	99	886	M	Adult	Forest	34	31.2	34.8	Closed	N/A	Rainy	Directly Away From The Sun	Partially Exposed	Moving	N/A	02/17/2022	16:00 - Sunset	Wet
16:55:11	229	886	M	Adult	Forest	34	31.2	34.8	Closed	N/A	Rainy	Partially Away From The Sun	Partially Exposed	Foraging	Leaves	02/17/2022	16:00 - Sunset	Wet
16:20:00	40	790	F	Sub-Adult	Walter	32.7	31.6	34.1	Open	N/A	Cloudy	Towards The Sun	Cloudy Day	Moving	N/A	02/18/2022	16:00 - Sunset	Wet
16:20:40	52	790	F	Sub-Adult	Walter	32.7	31.6	34.1	Open	N/A	Cloudy	Towards The Sun	Cloudy Day	Vigilant	N/A	02/18/2022	16:00 - Sunset	Wet
16:21:32	85	790	F	Sub-Adult	Walter	32.7	31.6	34.1	Open	N/A	Sunny	Towards The Sun	Fully Exposed	Moving	N/A	02/18/2022	16:00 - Sunset	Wet
16:22:57	30	790	F	Sub-Adult	Walter	32.7	31.6	34.1	Open	N/A	Sunny	Towards The Sun	Fully Exposed	Vigilant	N/A	02/18/2022	16:00 - Sunset	Wet
16:23:27	53	790	F	Sub-Adult	Walter	32.7	31.6	34.1	Open	N/A	Sunny	Towards The Sun	Fully Exposed	Moving	N/A	02/18/2022	16:00 - Sunset	Wet
16:24:20	20	790	F	Sub-Adult	Walter	32.7	31.6	34.1	Open	N/A	Sunny	Towards The Sun	Fully Exposed	Inactive	N/A	02/18/2022	16:00 - Sunset	Wet
16:24:40	44	790	F	Sub-Adult	Walter	32.7	31.6	34.1	Open	N/A	Sunny	Towards The Sun	Fully Exposed	Moving	N/A	02/18/2022	16:00 - Sunset	Wet
16:25:24	174	790	F	Sub-Adult	Walter	32.7	31.6	34.1	Open	N/A	Sunny	Towards The Sun	Cloudy Day	Inactive	N/A	02/18/2022	16:00 - Sunset	Wet
16:28:18	32	790	F	Sub-Adult	Walter	32.7	31.6	34.1	Open	N/A	Cloudy	Partially Away From The Sun	Cloudy Day	Inactive	N/A	02/18/2022	16:00 - Sunset	Wet
16:28:40	30	790	F	Sub-Adult	Walter	32.7	31.6	34.1	Open	N/A	Cloudy	Towards The Sun	Cloudy Day	Moving	N/A	02/18/2022	16:00 - Sunset	Wet
16:29:10	40	790	F	Sub-Adult	Walter	32.7	31.6	34.1	Open	N/A	Cloudy	Towards The Sun	Cloudy Day	Inactive	N/A	02/18/2022	16:00 - Sunset	Wet
16:29:50	49	790	F	Sub-Adult	Walter	32.7	31.6	34.1	Open	N/A	Cloudy	Partially Away From The Sun	Cloudy Day	Moving	N/A	02/18/2022	16:00 - Sunset	Wet
16:30:39	24	790	F	Sub-Adult	Walter	32.7	31.6	34.1	Open	N/A	Cloudy	Towards The Sun	Cloudy Day	Inactive	N/A	02/18/2022	16:00 - Sunset	Wet
16:31:03	40	790	F	Sub-Adult	Walter	32.7	31.6	34.1	Open	N/A	Cloudy	Partially Away From The Sun	Cloudy Day	Moving	N/A	02/18/2022	16:00 - Sunset	Wet
16:31:43	77	790	F	Sub-Adult	Walter	32.7	31.6	34.1	Open	N/A	Cloudy	Towards The Sun	Cloudy Day	Moving	N/A	02/18/2022	16:00 - Sunset	Wet
16:50:14	72	106	M	Juvenile	Nairobi	32.7	31.6	34.1	Road	N/A	Sunny	Towards The Sun	No Exposure	Interacting	N/A	02/18/2022	16:00 - Sunset	Wet
16:51:26	34	106	M	Juvenile	Nairobi	32.7	31.6	34.1	Road	N/A	Sunny	Directly Away From The Sun	No Exposure	Moving	N/A	02/18/2022	16:00 - Sunset	Wet
16:55:27	204	873	M	Adult	Polp	32.7	31.6	34.1	Closed	N/A	Sunny	Partially Away From The Sun	Partially Exposed	Inactive	N/A	02/18/2022	16:00 - Sunset	Wet
16:58:51	25	873	M	Adult	Polp	32.7	31.6	34.1	Closed	N/A	Sunny	Directly Away From The Sun	Partially Exposed	Moving	N/A	02/18/2022	16:00 - Sunset	Wet
16:59:16	644	873	M	Adult	Polp	32.7	31.6	34.1	Closed	N/A	Sunny	Towards The Sun	Partially Exposed	Inactive	N/A	02/18/2022	16:00 - Sunset	Wet
17:10:11	89	529	F	Adult	Noumea	32.7	31.6	34.1	Closed	N/A	Sunny	Towards The Sun	Partially Exposed	Inactive	N/A	02/18/2022	16:00 - Sunset	Wet
17:11:30	43	529	F	Adult	Noumea	32.7	31.6	34.1	Closed	N/A	Sunny	Directly Away From The Sun	Partially Exposed	Moving	N/A	02/18/2022	16:00 - Sunset	Wet
17:12:13	76	529	F	Adult	Noumea	32.7	31.6	34.1	Closed	N/A	Sunny	Partially Away From The Sun	Partially Exposed	Foraging	Leaves	02/18/2022	16:00 - Sunset	Wet
17:13:29	321	529	F	Adult	Noumea	32.7	31.6	34.1	Closed	N/A	Sunny	Directly Away From The Sun	Partially Exposed	Moving	N/A	02/18/2022	16:00 - Sunset	Wet
16:21:28	68	872	M	Adult	McFly	31.2	28.2	38.3	Road	N/A	Overcast	Directly Away From The Sun	Cloudy Day	Inactive	N/A	02/21/2022	16:00 - Sunset	Wet
16:22:36	5	872	M	Adult	McFly	31.2	28.2	38.3	Road	N/A	Overcast	Partially Away From The Sun	Cloudy Day	Moving	N/A	02/21/2022	16:00 - Sunset	Wet
16:22:41	425	872	M	Adult	McFly	31.2	28.2	38.3	Road	N/A	Overcast	Partially Away From The Sun	Cloudy Day	Foraging	Leaves	02/21/2022	16:00 - Sunset	Wet
16:29:44	124	872	M	Adult	McFly	31.2	28.2	38.3	Road	N/A	Overcast	Directly Away From The Sun	Cloudy Day	Foraging	Leaves	02/21/2022	16:00 - Sunset	Wet
16:31:48	30	872	M	Adult	McFly	31.2	28.2	38.3	Road	N/A	Overcast	Directly Away From The Sun	Cloudy Day	Inactive	N/A	02/21/2022	16:00 - Sunset	Wet
16:32:18	98	872	M	Adult	McFly	31.2	28.2	38.3	Road	N/A	Overcast	Towards The Sun	Cloudy Day	Foraging	Leaves	02/21/2022	16:00 - Sunset	Wet
16:34:06	114	872	M	Adult	McFly	31.2	28.2	38.3	Road	N/A	Overcast	Partially Away From The Sun	Cloudy Day	Foraging	Leaves	02/21/2022	16:00 - Sunset	Wet
07:23:35	59	881	M	Juvenile	Eswatini	24.1	29	36.4	Open	N/A	Sunny	Towards The Sun	No Exposure	Foraging	Leaves	02/23/2022	Sunrise - 10:00	Wet
07:24:34	50	881	M	Juvenile	Eswatini	24.1	29	36.4	Open	N/A	Sunny	Partially Away From The Sun	Partially Exposed	Inactive	N/A	02/23/2022	Sunrise - 10:00	Wet
07:25:24	131	881	M	Juvenile	Eswatini	24.1	29	36.4	Open	N/A	Sunny	Towards The Sun	Partially Exposed	Foraging	Leaves	02/23/2022	Sunrise - 10:00	Wet
07:27:35	62	881	M	Juvenile	Eswatini	24.1	29	36.4	Open	N/A	Sunny	Directly Away From The Sun	Fully Exposed	Foraging	Leaves	02/23/2022	Sunrise - 10:00	Wet
07:28:37	21	881	M	Juvenile	Eswatini	24.1	29	36.4	Open	N/A	Sunny	Partially Away From The Sun	Fully Exposed	Foraging	Leaves	02/23/2022	Sunrise - 10:00	Wet
07:28:58	90	881	M	Juvenile	Eswatini	24.1	29	36.4	Open	N/A	Sunny	Directly Away From The Sun	Fully Exposed	Foraging	Leaves	02/23/2022	Sunrise - 10:00	Wet
07:30:28	21	881	M	Juvenile	Eswatini	24.1	29	36.4	Open	N/A	Sunny	Towards The Sun	Fully Exposed	Moving	N/A	02/23/2022	Sunrise - 10:00	Wet
07:30:49	59	881	M	Juvenile	Eswatini	24.1	29	36.4	Open	N/A	Sunny	Partially Away From The Sun	Fully Exposed	Inactive	N/A	02/23/2022	Sunrise - 10:00	Wet
07:31:48	284	881	M	Juvenile	Eswatini	24.1	29	36.4	Open	N/A	Sunny	Directly Away From The Sun	Fully Exposed	Foraging	Leaves	02/23/2022	Sunrise - 10:00	Wet
07:36:32	22	881	M	Juvenile	Eswatini	24.1	29	36.4	Open	N/A	Sunny	Towards The Sun	Fully Exposed	Moving	N/A	02/23/2022	Sunrise - 10:00	Wet
07:36:54	82	881	M	Juvenile	Eswatini	24.1	29	36.4	Open	N/A	Sunny	Towards The Sun	No Exposure	Foraging	Leaves	02/23/2022	Sunrise - 10:00	Wet
07:38:16	44	881	M	Juvenile	Eswatini	24.1	29	36.4	Open	N/A	Sunny	Towards The Sun	Fully Exposed	Moving	N/A	02/23/2022	Sunrise - 10:00	Wet
07:40:23	51	517	F	Adult	Berthille	24.1	29	36.4	Open	N/A	Sunny	Directly Away From The Sun	Fully Exposed	Inactive	N/A	02/23/2022	Sunrise - 10:00	Wet
07:41:14	60	517	F	Adult	Berthille	24.1	29	36.4	Open	N/A	Sunny	Directly Away From The Sun	Fully Exposed	Vigilant	N/A	02/23/2022	Sunrise - 10:00	Wet
07:42:14	76	517	F	Adult	Berthille	24.1	29	36.4	Open	N/A	Sunny	Partially Away From The Sun	Fully Exposed	Moving	N/A	02/23/2022	Sunrise - 10:00	Wet
07:43:30	73	517	F	Adult	Berthille	24.1	29	36.4	Open	N/A	Sunny	Towards The Sun	Fully Exposed	Moving	N/A	02/23/2022	Sunrise - 10:00	Wet
07:44:43	25	517	F	Adult	Berthille	24.1	29	36.4	Open	N/A	Sunny	Partially Away From The Sun	Fully Exposed	Interacting	N/A	02/23/2022	Sunrise - 10:00	Wet
07:45:08	95	517	F	Adult	Berthille	24.1	29	36.4	Open	N/A	Sunny	Towards The Sun	Fully Exposed	Moving	N/A	02/23/2022	Sunrise - 10:00	Wet
07:46:43	52	517	F	Adult	Berthille	24.1	29	36.4	Open	N/A	Sunny	Partially Away From The Sun	Fully Exposed	Vigilant	N/A	02/23/2022	Sunrise - 10:00	Wet
07:47:35	23	517	F	Adult	Berthille	24.1	29	36.4	Open	N/A	Sunny	Directly Away From The Sun	Fully Exposed	Moving	N/A	02/23/2022	Sunrise - 10:00	Wet
07:47:58	62	517	F	Adult	Berthille	24.1	29	36.4	Open	N/A	Sunny	Partially Away From The Sun	Fully Exposed	Moving	N/A	02/23/2022	Sunrise - 10:00	Wet
07:50:16	20	884	M	Sub-Adult	Night	24.1	29	36.4	Open	N/A	Sunny	Directly Away From The Sun	Fully Exposed	Moving	N/A	02/23/2022	Sunrise - 10:00	Wet
07:50:36	32	884	M	Sub-Adult	Night	24.1	29	36.4	Open	N/A	Sunny	Partially Away From The Sun	Fully Exposed	Vigilant	N/A	02/23/2022	Sunrise - 10:00	Wet
07:51:08	30	884	M	Sub-Adult	Night	24.1	29	36.4	Open	N/A	Sunny	Directly Away From The Sun	Fully Exposed	Moving	N/A	02/23/2022	Sunrise - 10:00	Wet
07:51:38	47	884	M	Sub-Adult	Night	24.1	29	36.4	Open	N/A	Sunny	Towards The Sun	Partially Exposed	Vigilant	N/A	02/23/2022	Sunrise - 10:00	Wet
07:52:25	43	884	M	Sub-Adult	Night	24.1	29	36.4	Open	N/A	Sunny	Towards The Sun	Partially Exposed	Inactive	N/A	02/23/2022	Sunrise - 10:00	Wet
07:53:08	32	884	M	Sub-Adult	Night	24.1	29	36.4	Open	N/A	Sunny	Towards The Sun	Partially Exposed	Foraging	Leaves	02/23/2022	Sunrise - 10:00	Wet
07:53:40	27	884	M	Sub-Adult	Night	24.1	29	36.4	Open	N/A	Sunny	Partially Away From The Sun	Partially Exposed	Moving	N/A	02/23/2022	Sunrise - 10:00	Wet
07:54:07	22	884	M	Sub-Adult	Night	24.1	29	36.4	Open	N/A	Sunny	Towards The Sun	No Exposure	Moving	N/A	02/23/2022	Sunrise - 10:00	Wet
07:54:29	51	884	M	Sub-Adult	Night	24.1	29	36.4	Open	N/A	Sunny	Towards The Sun	No Exposure	Vigilant	N/A	02/23/2022	Sunrise - 10:00	Wet
07:55:20	207	884	M	Sub-Adult	Night	24.1	29	36.4	Open	N/A	Sunny	Towards The Sun	No Exposure	Inactive	N/A	02/23/2022	Sunrise - 10:00	Wet
07:58:47	37	884	M	Sub-Adult	Night	24.1	29	36.4	Open	N/A	Sunny	Towards The Sun	No Exposure	Foraging	leaves	02/23/2022	Sunrise - 10:00	Wet
07:59:24	26	884	M	Sub-Adult	Night	24.1	29	36.4	Open	N/A	Sunny	Partially Away From The Sun	No Exposure	Moving	N/A	02/23/2022	Sunrise - 10:00	Wet
07:59:50	24	884	M	Sub-Adult	Night	24.1	29	36.4	Open	N/A	Sunny	Towards The Sun	Fully Exposed	Moving	N/A	02/23/2022	Sunrise - 10:00	Wet
08:00:14	184	884	M	Sub-Adult	Night	24.1	29	36.4	Open	N/A	Sunny	Towards The Sun	Fully Exposed	Inactive	N/A	02/23/2022	Sunrise - 10:00	Wet
08:03:18	24	884	M	Sub-Adult	Night	24.1	29	36.4	Open	N/A	Sunny	Towards The Sun	Fully Exposed	Moving	N/A	02/23/2022	Sunrise - 10:00	Wet
08:03:42	27	884	M	Sub-Adult	Night	24.1	29	36.4	Open	N/A	Sunny	Towards The Sun	Fully Exposed	Inactive	N/A	02/23/2022	Sunrise - 10:00	Wet
08:04:09	51	884	M	Sub-Adult	Night	24.1	29	36.4	Open	N/A	Sunny	Towards The Sun	Fully Exposed	Moving	N/A	02/23/2022	Sunrise - 10:00	Wet
16:07:19	59	881	M	Juvenile	Napoleon	34.1	33.1	36.4	Road	N/A	Sunny	Directly Away From The Sun	Fully Exposed	Inactive	N/A	02/23/2022	16:00 - Sunset	Wet
16:08:18	58	881	M	Juvenile	Napoleon	34.1	33.1	36.4	Road	N/A	Sunny	Partially Away From The Sun	Fully Exposed	Inactive	N/A	02/23/2022	16:00 - Sunset	Wet
16:09:16	76	881	M	Juvenile	Napoleon	34.1	33.1	36.4	Road	N/A	Cloudy	Partially Away From The Sun	Cloudy Day	Inactive	N/A	02/23/2022	16:00 - Sunset	Wet
16:10:32	64	881	M	Juvenile	Napoleon	34.1	33.1	36.4	Road	N/A	Cloudy	Partially Away From The Sun	Cloudy Day	Foraging	Leaves	02/23/2022	16:00 - Sunset	Wet
16:11:36	129	881	M	Juvenile	Napoleon	34.1	33.1	36.4	Road	N/A	Cloudy	Directly Away From The Sun	Cloudy Day	Foraging	Leaves	02/23/2022	16:00 - Sunset	Wet
16:13:45	181	881	M	Juvenile	Napoleon	34.1	33.1	36.4	Road	N/A	Cloudy	Partially Away From The Sun	Cloudy Day	Foraging	Leaves	02/23/2022	16:00 - Sunset	Wet
16:16:46	25	881	M	Juvenile	Napoleon	34.1	33.1	36.4	Road	N/A	Cloudy	Partially Away From The Sun	Cloudy Day	Moving	N/A	02/23/2022	16:00 - Sunset	Wet
16:17:11	153	881	M	Juvenile	Napoleon	34.1	33.1	36.4	Road	N/A	Cloudy	Directly Away From The Sun	Cloudy Day	Foraging	Leaves	02/23/2022	16:00 - Sunset	Wet
16:19:44	45	881	M	Juvenile	Napoleon	34.1	33.1	36.4	Road	N/A	Cloudy	Partially Away From The Sun	Cloudy Day	Foraging	Leaves	02/23/2022	16:00 - Sunset	Wet
16:20:29	91	881	M	Juvenile	Napoleon	34.1	33.1	36.4	Road	N/A	Cloudy	Directly Away From The Sun	Cloudy Day	Foraging	N/A	02/23/2022	16:00 - Sunset	Wet
17:03:43	68	797	F	Adult	Noumea	34.1	33.1	36.4	Open	N/A	Sunny	Partially Away From The Sun	Fully Exposed	Inactive	N/A	02/23/2022	16:00 - Sunset	Wet
17:04:51	94	797	F	Adult	Noumea	34.1	33.1	36.4	Road	N/A	Sunny	Towards The Sun	Partially Exposed	Moving	N/A	02/23/2022	16:00 - Sunset	Wet
17:06:25	144	797	F	Adult	Noumea	34.1	33.1	36.4	Road	N/A	Sunny	Partially Away From The Sun	Partially Exposed	Vigilant	N/A	02/23/2022	16:00 - Sunset	Wet
17:08:49	70	797	F	Adult	Noumea	34.1	33.1	36.4	Road	N/A	Sunny	Directly Away From The Sun	Partially Exposed	Moving	N/A	02/23/2022	16:00 - Sunset	Wet
17:09:59	55	797	F	Adult	Noumea	34.1	33.1	36.4	Road	N/A	Sunny	Partially Away From The Sun	Partially Exposed	Inactive	N/A	02/23/2022	16:00 - Sunset	Wet
17:10:54	24	797	F	Adult	Noumea	34.1	33.1	36.4	Road	None	Sunny	Directly Away From The Sun	Partially Exposed	Moving	N/A	02/23/2022	16:00 - Sunset	Wet
17:11:18	37	797	F	Adult	Noumea	34.1	33.1	36.4	Road	N/A	Sunny	Directly Away From The Sun	Fully Exposed	Inactive	N/A	02/23/2022	16:00 - Sunset	Wet
17:11:55	217	797	F	Adult	Noumea	34.1	33.1	36.4	Road	N/A	Cloudy	Towards The Sun	Cloudy Day	Foraging	Leaves	02/23/2022	16:00 - Sunset	Wet
17:15:32	88	797	F	Adult	Noumea	34.1	33.1	36.4	Closed	N/A	Cloudy	Partially Away From The Sun	Cloudy Day	Foraging	Leaves	02/23/2022	16:00 - Sunset	Wet
17:17:25	51	875	M	Adult	Lovely	34.1	33.1	36.4	Closed	N/A	Cloudy	Towards The Sun	Cloudy Day	Inactive	N/A	02/23/2022	16:00 - Sunset	Wet
17:18:16	45	875	M	Adult	Lovely	34.1	33.1	36.4	Closed	N/A	Sunny	Towards The Sun	Partially Exposed	Inactive	N/A	02/23/2022	16:00 - Sunset	Wet
17:19:01	20	875	M	Adult	Lovely	34.1	33.1	36.4	Closed	N/A	Sunny	Towards The Sun	Partially Exposed	Moving	N/A	02/23/2022	16:00 - Sunset	Wet
17:19:21	28	875	M	Adult	Lovely	34.1	33.1	36.4	Road	N/A	Sunny	Partially Away From The Sun	No Exposure	Moving	N/A	02/23/2022	16:00 - Sunset	Wet
17:19:49	123	875	M	Adult	Lovely	34.1	33.1	36.4	Road	N/A	Sunny	Partially Away From The Sun	No Exposure	Inactive	N/A	02/23/2022	16:00 - Sunset	Wet
17:21:52	30	875	M	Adult	Lovely	34.1	33.1	36.4	Road	N/A	Sunny	Partially Away From The Sun	Partially Exposed	Moving	N/A	02/23/2022	16:00 - Sunset	Wet
17:22:22	59	875	M	Adult	Lovely	34.1	33.1	36.4	Road	N/A	Sunny	Partially Away From The Sun	Fully Exposed	Inactive	N/A	02/23/2022	16:00 - Sunset	Wet
17:23:21	67	875	M	Adult	Lovely	34.1	33.1	36.4	Road	N/A	Sunny	Partially Away From The Sun	Fully Exposed	Moving	N/A	02/23/2022	16:00 - Sunset	Wet
17:24:28	71	875	M	Adult	Lovely	34.1	33.1	36.4	Closed	N/A	Sunny	Partially Away From The Sun	Partially Exposed	Inactive	N/A	02/23/2022	16:00 - Sunset	Wet
17:25:39	38	875	M	Adult	Lovely	34.1	33.1	36.4	Closed	N/A	Sunny	Directly Away From The Sun	Partially Exposed	Moving	N/A	02/23/2022	16:00 - Sunset	Wet
17:26:17	87	875	M	Adult	Lovely	34.1	33.1	36.4	Closed	N/A	Sunny	Partially Away From The Sun	Partially Exposed	Foraging	Leaves	02/23/2022	16:00 - Sunset	Wet
17:27:44	57	875	M	Adult	Lovely	34.1	33.1	36.4	Closed	N/A	Sunny	Directly Away From The Sun	Partially Exposed	Foraging	Leaves	02/23/2022	16:00 - Sunset	Wet
17:28:41	23	875	M	Adult	Lovely	34.1	33.1	36.4	Closed	N/A	Sunny	Directly Away From The Sun	Partially Exposed	Moving	N/A	02/23/2022	16:00 - Sunset	Wet
17:29:04	176	875	M	Adult	Lovely	34.1	33.1	36.4	Closed	N/A	Sunny	Partially Away From The Sun	Partially Exposed	Foraging	Leaves	02/23/2022	16:00 - Sunset	Wet
07:27:50	124	610	M	Juvenile	Sami	22.4	28.8	36.4	Open	N/A	Sunny	Towards The Sun	Fully Exposed	Inactive	N/A	02/24/2022	Sunrise - 10:00	Wet
07:29:54	56	610	M	Juvenile	Sami	22.4	28.8	36.4	Open	N/A	Sunny	Partially Away From The Sun	Fully Exposed	Moving	N/A	02/24/2022	Sunrise - 10:00	Wet
07:30:50	118	610	M	Juvenile	Sami	22.4	28.8	36.4	Open	N/A	Sunny	Directly Away From The Sun	Fully Exposed	Inactive	N/A	02/24/2022	Sunrise - 10:00	Wet
07:32:48	269	610	M	Juvenile	Sami	22.4	28.8	36.4	Open	N/A	Sunny	Partially Away From The Sun	Fully Exposed	Inactive	N/A	02/24/2022	Sunrise - 10:00	Wet
07:37:17	43	610	M	Juvenile	Sami	22.4	28.8	36.4	Open	N/A	Sunny	Partially Away From The Sun	Fully Exposed	Moving	N/A	02/24/2022	Sunrise - 10:00	Wet
07:39:46	509	914	F	Adult	Noumea	22.4	28.8	36.4	Open	N/A	Sunny	Partially Away From The Sun	Fully Exposed	Inactive	N/A	02/24/2022	Sunrise - 10:00	Wet
07:48:15	47	914	F	Adult	Noumea	22.4	28.8	36.4	Open	N/A	Sunny	Partially Away From The Sun	Fully Exposed	Moving	N/A	02/24/2022	Sunrise - 10:00	Wet
07:49:02	56	914	F	Adult	Noumea	22.4	28.8	36.4	Open	N/A	Sunny	Partially Away From The Sun	No Exposure	Inactive	N/A	02/24/2022	Sunrise - 10:00	Wet
07:49:58	119	914	F	Adult	Noumea	22.4	28.8	36.4	Open	N/A	Sunny	Partially Away From The Sun	Partially Exposed	Inactive	N/A	02/24/2022	Sunrise - 10:00	Wet
07:51:57	44	914	F	Adult	Noumea	22.4	28.8	36.4	Open	N/A	Sunny	Partially Away From The Sun	Fully Exposed	Moving	N/A	02/24/2022	Sunrise - 10:00	Wet
07:52:41	97	914	F	Adult	Noumea	22.4	28.8	36.4	Open	N/A	Sunny	Partially Away From The Sun	Fully Exposed	Inactive	N/A	02/24/2022	Sunrise - 10:00	Wet
07:54:18	42	914	F	Adult	Noumea	22.4	28.8	36.4	Open	N/A	Sunny	Towards The Sun	Fully Exposed	Inactive	N/A	02/24/2022	Sunrise - 10:00	Wet
07:56:05	45	501	F	Juvenile	Nairobi	22.4	28.8	36.4	Open	N/A	Sunny	Directly Away From The Sun	Fully Exposed	Moving	N/A	02/24/2022	Sunrise - 10:00	Wet
07:56:50	46	501	F	Juvenile	Nairobi	22.4	28.8	36.4	Open	N/A	Sunny	Directly Away From The Sun	Partially Exposed	Inactive	N/A	02/24/2022	Sunrise - 10:00	Wet
07:57:36	39	501	F	Juvenile	Nairobi	22.4	28.8	36.4	Open	N/A	Sunny	Directly Away From The Sun	Fully Exposed	Moving	N/A	02/24/2022	Sunrise - 10:00	Wet
07:58:15	119	501	F	Juvenile	Nairobi	22.4	28.8	36.4	Open	N/A	Sunny	Towards The Sun	Fully Exposed	Inactive	N/A	02/24/2022	Sunrise - 10:00	Wet
08:00:14	36	501	F	Juvenile	Nairobi	22.4	28.8	36.4	Open	N/A	Sunny	Directly Away From The Sun	Fully Exposed	Moving	N/A	02/24/2022	Sunrise - 10:00	Wet
08:00:50	28	501	F	Juvenile	Nairobi	22.4	28.8	36.4	Open	N/A	Sunny	Directly Away From The Sun	Fully Exposed	Inactive	N/A	02/24/2022	Sunrise - 10:00	Wet
08:01:18	30	501	F	Juvenile	Nairobi	22.4	28.8	36.4	Open	N/A	Sunny	Partially Away From The Sun	Fully Exposed	Inactive	N/A	02/24/2022	Sunrise - 10:00	Wet
08:01:48	27	501	F	Juvenile	Nairobi	22.4	28.8	36.4	Open	N/A	Sunny	Directly Away From The Sun	Fully Exposed	Vigilant	N/A	02/24/2022	Sunrise - 10:00	Wet
08:02:45	101	501	F	Juvenile	Nairobi	22.4	28.8	36.4	Open	N/A	Sunny	Partially Away From The Sun	Fully Exposed	Vigilant	N/A	02/24/2022	Sunrise - 10:00	Wet
08:04:26	94	501	F	Juvenile	Nairobi	22.4	28.8	36.4	Open	N/A	Sunny	Partially Away From The Sun	Fully Exposed	Moving	N/A	02/24/2022	Sunrise - 10:00	Wet
16:45:13	92	887	M	Adult	Lovely	34.8	33.2	35.1	Open	N/A	Sunny	Towards The Sun	No Exposure	Foraging	Leaves	02/25/2022	16:00 - Sunset	Wet
16:46:45	72	887	M	Adult	Lovely	34.8	33.2	35.1	Open	N/A	Sunny	Partially Away From The Sun	Partially Exposed	Foraging	Leaves	02/25/2022	16:00 - Sunset	Wet
16:47:57	597	887	M	Adult	Lovely	34.8	33.2	35.1	Open	N/A	Sunny	Directly Away From The Sun	Partially Exposed	Inactive	N/A	02/25/2022	16:00 - Sunset	Wet
16:57:54	33	887	M	Adult	Lovely	34.8	33.2	35.1	Open	N/A	Sunny	Directly Away From The Sun	Fully Exposed	Moving	N/A	02/25/2022	16:00 - Sunset	Wet
16:58:27	50	887	M	Adult	Lovely	34.8	33.2	35.1	Open	N/A	Sunny	Towards The Sun	Fully Exposed	Vigilant	N/A	02/25/2022	16:00 - Sunset	Wet
16:59:17	43	887	M	Adult	Lovely	34.8	33.2	35.1	Closed	N/A	Sunny	Directly Away From The Sun	Partially Exposed	Moving	N/A	02/25/2022	16:00 - Sunset	Wet
17:00:44	62	616	F	Adult	Kagiso	34.8	33.2	35.1	Open	N/A	Sunny	Partially Away From The Sun	Fully Exposed	Moving	N/A	02/25/2022	16:00 - Sunset	Wet
17:01:46	30	616	F	Adult	Kagiso	34.8	33.2	35.1	Open	N/A	Sunny	Directly Away From The Sun	Fully Exposed	Moving	N/A	02/25/2022	16:00 - Sunset	Wet
17:02:16	22	616	F	Adult	Kagiso	34.8	33.2	35.1	Open	N/A	Sunny	Directly Away From The Sun	Fully Exposed	Inactive	N/A	02/25/2022	16:00 - Sunset	Wet
17:02:38	24	616	F	Adult	Kagiso	34.8	33.2	35.1	Open	N/A	Sunny	Partially Away From The Sun	Fully Exposed	Inactive	N/A	02/25/2022	16:00 - Sunset	Wet
17:03:02	46	616	F	Adult	Kagiso	34.8	33.2	35.1	Closed	N/A	Sunny	Directly Away From The Sun	Partially Exposed	Moving	N/A	02/25/2022	16:00 - Sunset	Wet
17:03:48	65	616	F	Adult	Kagiso	34.8	33.2	35.1	Closed	N/A	Sunny	Partially Away From The Sun	Partially Exposed	Inactive	N/A	02/25/2022	16:00 - Sunset	Wet
17:04:53	59	616	F	Adult	Kagiso	34.8	33.2	35.1	Closed	N/A	Sunny	Directly Away From The Sun	Partially Exposed	Moving	N/A	02/25/2022	16:00 - Sunset	Wet
17:05:52	53	616	F	Adult	Kagiso	34.8	33.2	35.1	Closed	N/A	Sunny	Directly Away From The Sun	No Exposure	Inactive	N/A	02/25/2022	16:00 - Sunset	Wet
17:06:45	54	616	F	Adult	Kagiso	34.8	33.2	35.1	Closed	N/A	Sunny	Partially Away From The Sun	Partially Exposed	Moving	N/A	02/25/2022	16:00 - Sunset	Wet
17:07:39	54	616	F	Adult	Kagiso	34.8	33.2	35.1	Closed	N/A	Sunny	Towards The Sun	Partially Exposed	Inactive	N/A	02/25/2022	16:00 - Sunset	Wet
17:08:33	22	616	F	Adult	Kagiso	34.8	33.2	35.1	Closed	N/A	Sunny	Towards The Sun	Partially Exposed	Moving	N/A	02/25/2022	16:00 - Sunset	Wet
17:08:55	88	616	F	Adult	Kagiso	34.8	33.2	35.1	Closed	N/A	Sunny	Towards The Sun	No Exposure	Inactive	N/A	02/25/2022	16:00 - Sunset	Wet
17:10:23	37	616	F	Adult	Kagiso	34.8	33.2	35.1	Closed	N/A	Sunny	Partially Away From The Sun	Partially Exposed	Moving	N/A	02/25/2022	16:00 - Sunset	Wet
17:14:37	58	608	M	Adult	Polp	34.8	33.2	35.1	Road	N/A	Sunny	Partially Away From The Sun	Fully Exposed	Moving	N/A	02/25/2022	16:00 - Sunset	Wet
17:15:35	112	608	M	Adult	Polp	34.8	33.2	35.1	Road	N/A	Sunny	Towards The Sun	Partially Exposed	Inactive	N/A	02/25/2022	16:00 - Sunset	Wet
17:17:27	25	608	M	Adult	Polp	34.8	33.2	35.1	Road	N/A	Sunny	Partially Away From The Sun	Fully Exposed	Moving	N/A	02/25/2022	16:00 - Sunset	Wet
17:17:52	87	608	M	Adult	Polp	34.8	33.2	35.1	Open	N/A	Sunny	Directly Away From The Sun	Fully Exposed	Moving	N/A	02/25/2022	16:00 - Sunset	Wet
17:19:19	132	608	M	Adult	Polp	34.8	33.2	35.1	Open	N/A	Sunny	Directly Away From The Sun	Fully Exposed	Interacting	N/A	02/25/2022	16:00 - Sunset	Wet
17:21:31	194	608	M	Adult	Polp	34.8	33.2	35.1	Open	N/A	Sunny	Towards The Sun	Fully Exposed	Inactive	N/A	02/25/2022	16:00 - Sunset	Wet
17:24:45	15	608	M	Adult	Polp	34.8	33.2	35.1	Open	N/A	Sunny	Partially Away From The Sun	Fully Exposed	Moving	N/A	02/25/2022	16:00 - Sunset	Wet
17:56:50	50	130	F	Adult	Berthille	34.6	32.4	35.9	Road	N/A	Cloudy	Directly Away From The Sun	Cloudy Day	Inactive	N/A	02/28/2022	16:00 - Sunset	Wet
17:57:40	32	130	F	Adult	Berthille	34.6	32.4	35.9	Open	N/A	Cloudy	Partially Away From The Sun	Cloudy Day	Moving	N/A	02/28/2022	16:00 - Sunset	Wet
17:58:12	32	130	F	Adult	Berthille	34.6	32.4	35.9	Open	N/A	Cloudy	Partially Away From The Sun	Cloudy Day	Vigilant	N/A	02/28/2022	16:00 - Sunset	Wet
17:58:44	16	130	F	Adult	Berthille	34.6	32.4	35.9	Open	N/A	Cloudy	Directly Away From The Sun	Cloudy Day	Moving	N/A	02/28/2022	16:00 - Sunset	Wet
12:17:55	126	845	M	Sub-Adult	Skinny	31.5	33.2	34.8	Open	N/A	Cloudy	Partially Away From The Sun	Cloudy Day	Moving	N/A	2022-01-03	12:00 - 14:00	Wet
12:20:01	70	845	M	Sub-Adult	Skinny	31.5	33.2	34.8	Open	N/A	Cloudy	Towards The Sun	Cloudy Day	Vigilant	N/A	2022-01-03	12:00 - 14:00	Wet
12:21:11	23	845	M	Sub-Adult	Skinny	31.5	33.2	34.8	Open	N/A	Sunny	Directly Away From The Sun	Fully Exposed	Moving	N/A	2022-01-03	12:00 - 14:00	Wet
12:21:34	27	845	M	Sub-Adult	Skinny	31.5	33.2	34.8	Open	N/A	Cloudy	Partially Away From The Sun	Cloudy Day	Vigilant	N/A	2022-01-03	12:00 - 14:00	Wet
12:22:01	28	845	M	Sub-Adult	Skinny	31.5	33.2	34.8	Open	N/A	Sunny	Directly Away From The Sun	Fully Exposed	Moving	N/A	2022-01-03	12:00 - 14:00	Wet
12:22:29	25	845	M	Sub-Adult	Skinny	31.5	33.2	34.8	Open	N/A	Sunny	Partially Away From The Sun	Fully Exposed	Foraging	Leaves	2022-01-03	12:00 - 14:00	Wet
12:22:54	100	845	M	Sub-Adult	Skinny	31.5	33.2	34.8	Open	N/A	Sunny	Directly Away From The Sun	Fully Exposed	Moving	N/A	2022-01-03	12:00 - 14:00	Wet
12:24:34	35	845	M	Sub-Adult	Skinny	31.5	33.2	34.8	Road	N/A	Sunny	Directly Away From The Sun	Fully Exposed	Inactive	N/A	2022-01-03	12:00 - 14:00	Wet
12:25:09	166	845	M	Sub-Adult	Skinny	31.5	33.2	34.8	Road	N/A	Sunny	Directly Away From The Sun	Fully Exposed	Moving	N/A	2022-01-03	12:00 - 14:00	Wet
12:27:55	23	845	M	Sub-Adult	Skinny	31.5	33.2	34.8	Road	N/A	Cloudy	Partially Away From The Sun	Cloudy Day	Inactive	N/A	2022-01-03	12:00 - 14:00	Wet
12:28:18	222	845	M	Sub-Adult	Skinny	31.5	33.2	34.8	Road	N/A	Cloudy	Directly Away From The Sun	Cloudy Day	Moving	N/A	2022-01-03	12:00 - 14:00	Wet
12:32:09	20	951	M	Adult	Lovely	31.5	33.2	34.8	Road	N/A	Sunny	Partially Away From The Sun	Fully Exposed	Inactive	N/A	2022-01-03	12:00 - 14:00	Wet
12:32:29	60	951	M	Adult	Lovely	31.5	33.2	34.8	Road	N/A	Sunny	Directly Away From The Sun	Fully Exposed	Moving	N/A	2022-01-03	12:00 - 14:00	Wet
12:33:29	28	951	M	Adult	Lovely	31.5	33.2	34.8	Road	N/A	Sunny	Directly Away From The Sun	Fully Exposed	Moving	N/A	2022-01-03	12:00 - 14:00	Wet
12:33:57	141	951	M	Adult	Lovely	31.5	33.2	34.8	Road	N/A	Sunny	Directly Away From The Sun	Fully Exposed	Foraging	Leaves	2022-01-03	12:00 - 14:00	Wet
12:36:18	81	951	M	Adult	Lovely	31.5	33.2	34.8	Road	N/A	Sunny	Directly Away From The Sun	Fully Exposed	Moving	N/A	2022-01-03	12:00 - 14:00	Wet
12:37:39	90	951	M	Adult	Lovely	31.5	33.2	34.8	Closed	N/A	Sunny	Partially Away From The Sun	Partially Exposed	Moving	N/A	2022-01-03	12:00 - 14:00	Wet
12:39:09	19	951	M	Adult	Lovely	31.5	33.2	34.8	Road	N/A	Sunny	Directly Away From The Sun	Fully Exposed	Inactive	N/A	2022-01-03	12:00 - 14:00	Wet
12:39:28	27	951	M	Adult	Lovely	31.5	33.2	34.8	Road	N/A	Sunny	Partially Away From The Sun	Fully Exposed	Inactive	N/A	2022-01-03	12:00 - 14:00	Wet
12:39:55	92	951	M	Adult	Lovely	31.5	33.2	34.8	Road	N/A	Sunny	Directly Away From The Sun	Fully Exposed	Moving	N/A	2022-01-03	12:00 - 14:00	Wet
12:41:27	86	951	M	Adult	Lovely	31.5	33.2	34.8	Road	N/A	Sunny	Directly Away From The Sun	Fully Exposed	Foraging	Leaves	2022-01-03	12:00 - 14:00	Wet
12:42:53	52	951	M	Adult	Lovely	31.5	33.2	34.8	Road	N/A	Sunny	Partially Away From The Sun	Fully Exposed	Foraging	Leaves	2022-01-03	12:00 - 14:00	Wet
12:43:45	255	951	M	Adult	Lovely	31.5	33.2	34.8	Closed	N/A	Sunny	Directly Away From The Sun	Fully Exposed	Foraging	N/A	2022-01-03	12:00 - 14:00	Wet
17:12:28	78	572	M	Adult	Vejay	35.5	33	35.6	Road	N/A	Sunny	Towards The Sun	Fully Exposed	Vigilant	N/A	2022-02-03	16:00 - Sunset	Wet
17:13:46	494	572	M	Adult	Vejay	35.5	33	35.6	Closed	N/A	Sunny	Partially Away From The Sun	Partially Exposed	Moving	N/A	2022-02-03	16:00 - Sunset	Wet
08:55:07	250	893	M	Adult	Bunnychow	24.3	30.3	36.2	Open	N/A	Sunny	Towards The Sun	Fully Exposed	Inactive	N/A	2022-04-03	Sunrise - 10:00	Wet
08:59:17	49	893	M	Adult	Bunnychow	24.3	30.3	36.2	Open	N/A	Sunny	Partially Away From The Sun	Fully Exposed	Inactive	N/A	2022-04-03	Sunrise - 10:00	Wet
09:00:06	64	893	M	Adult	Bunnychow	24.3	30.3	36.2	Open	N/A	Sunny	Towards The Sun	Fully Exposed	Inactive	N/A	2022-04-03	Sunrise - 10:00	Wet
09:01:10	82	893	M	Adult	Bunnychow	24.3	30.3	36.2	Open	N/A	Sunny	Towards The Sun	Fully Exposed	Interacting	N/A	2022-04-03	Sunrise - 10:00	Wet
09:02:32	40	893	M	Adult	Bunnychow	24.3	30.3	36.2	Open	N/A	Sunny	Towards The Sun	Fully Exposed	Vigilant	N/A	2022-04-03	Sunrise - 10:00	Wet
09:03:12	33	893	M	Adult	Bunnychow	24.3	30.3	36.2	Open	N/A	Sunny	Towards The Sun	Fully Exposed	Inactive	N/A	2022-04-03	Sunrise - 10:00	Wet
09:03:45	230	893	M	Adult	Bunnychow	24.3	30.3	36.2	Open	N/A	Sunny	Towards The Sun	Fully Exposed	Vigilant	N/A	2022-04-03	Sunrise - 10:00	Wet
09:07:35	67	893	M	Adult	Bunnychow	24.3	30.3	36.2	Open	N/A	Sunny	Partially Away From The Sun	Fully Exposed	Moving	N/A	2022-04-03	Sunrise - 10:00	Wet
09:08:42	78	893	M	Adult	Bunnychow	24.3	30.3	36.2	Open	N/A	Sunny	Partially Away From The Sun	Partially Exposed	Inactive	N/A	2022-04-03	Sunrise - 10:00	Wet
09:10:03	35	537	M	Adult	Lethabo	24.3	30.3	36.2	Open	N/A	Sunny	Towards The Sun	No Exposure	Foraging	Leaves	2022-04-03	Sunrise - 10:00	Wet
09:10:38	32	537	M	Adult	Lethabo	24.3	30.3	36.2	Open	N/A	Sunny	Partially Away From The Sun	Partially Exposed	Moving	N/A	2022-04-03	Sunrise - 10:00	Wet
09:11:10	42	537	M	Adult	Lethabo	24.3	30.3	36.2	Open	N/A	Sunny	Towards The Sun	Fully Exposed	Inactive	N/A	2022-04-03	Sunrise - 10:00	Wet
09:11:52	24	537	M	Adult	Lethabo	24.3	30.3	36.2	Open	N/A	Sunny	Towards The Sun	Fully Exposed	Moving	N/A	2022-04-03	Sunrise - 10:00	Wet
09:12:16	43	537	M	Adult	Lethabo	24.3	30.3	36.2	Open	N/A	Sunny	Partially Away From The Sun	Fully Exposed	Moving	N/A	2022-04-03	Sunrise - 10:00	Wet
09:12:59	84	537	M	Adult	Lethabo	24.3	30.3	36.2	Open	N/A	Sunny	Partially Away From The Sun	Fully Exposed	Inactive	N/A	2022-04-03	Sunrise - 10:00	Wet
09:14:23	25	537	M	Adult	Lethabo	24.3	30.3	36.2	Open	N/A	Sunny	Partially Away From The Sun	Partially Exposed	Moving	N/A	2022-04-03	Sunrise - 10:00	Wet
09:14:48	21	537	M	Adult	Lethabo	24.3	30.3	36.2	Open	N/A	Sunny	Directly Away From The Sun	Fully Exposed	Moving	N/A	2022-04-03	Sunrise - 10:00	Wet
09:15:09	40	537	M	Adult	Lethabo	24.3	30.3	36.2	Open	N/A	Sunny	Partially Away From The Sun	Partially Exposed	Foraging	Leaves	2022-04-03	Sunrise - 10:00	Wet
09:15:49	21	537	M	Adult	Lethabo	24.3	30.3	36.2	Open	N/A	Sunny	Towards The Sun	Fully Exposed	Foraging	Leaves	2022-04-03	Sunrise - 10:00	Wet
09:16:10	115	537	M	Adult	Lethabo	24.3	30.3	36.2	Open	N/A	Sunny	Partially Away From The Sun	Fully Exposed	Foraging	Leaves	2022-04-03	Sunrise - 10:00	Wet
09:18:05	33	537	M	Adult	Lethabo	24.3	30.3	36.2	Open	N/A	Sunny	Directly Away From The Sun	Fully Exposed	Moving	N/A	2022-04-03	Sunrise - 10:00	Wet
09:18:38	22	537	M	Adult	Lethabo	24.3	30.3	36.2	Open	N/A	Sunny	Partially Away From The Sun	Fully Exposed	Moving	N/A	2022-04-03	Sunrise - 10:00	Wet
09:19:21	25	939	M	Adult	Sun	24.3	30.3	36.2	Open	N/A	Sunny	Directly Away From The Sun	Fully Exposed	Foraging	Leaves	2022-04-03	Sunrise - 10:00	Wet
09:19:46	38	939	M	Adult	Sun	24.3	30.3	36.2	Open	N/A	Sunny	Partially Away From The Sun	Fully Exposed	Moving	N/A	2022-04-03	Sunrise - 10:00	Wet
09:20:24	90	939	M	Adult	Sun	24.3	30.3	36.2	Open	N/A	Sunny	Towards The Sun	No Exposure	Foraging	Leaves	2022-04-03	Sunrise - 10:00	Wet
09:21:54	81	939	M	Adult	Sun	24.3	30.3	36.2	Open	N/A	Sunny	Partially Away From The Sun	Partially Exposed	Foraging	Leaves	2022-04-03	Sunrise - 10:00	Wet
09:23:15	64	939	M	Adult	Sun	24.3	30.3	36.2	Open	N/A	Sunny	Towards The Sun	Partially Exposed	Foraging	Leaves	2022-04-03	Sunrise - 10:00	Wet
09:24:19	19	939	M	Adult	Sun	24.3	30.3	36.2	Open	N/A	Sunny	Towards The Sun	Partially Exposed	Inactive	N/A	2022-04-03	Sunrise - 10:00	Wet
09:24:38	79	939	M	Adult	Sun	24.3	30.3	36.2	Open	N/A	Sunny	Partially Away From The Sun	Fully Exposed	Inactive	N/A	2022-04-03	Sunrise - 10:00	Wet
09:25:57	67	939	M	Adult	Sun	24.3	30.3	36.2	Open	N/A	Sunny	Towards The Sun	Fully Exposed	Moving	N/A	2022-04-03	Sunrise - 10:00	Wet
09:27:04	18	939	M	Adult	Sun	24.3	30.3	36.2	Open	N/A	Sunny	Towards The Sun	Fully Exposed	Inactive	N/A	2022-04-03	Sunrise - 10:00	Wet
09:27:22	219	939	M	Adult	Sun	24.3	30.3	36.2	Open	N/A	Sunny	Towards The Sun	No Exposure	Foraging	Leaves	2022-04-03	Sunrise - 10:00	Wet
09:31:01	82	939	M	Adult	Sun	24.3	30.3	36.2	Open	N/A	Sunny	Partially Away From The Sun	No Exposure	Foraging	Leaves	2022-04-03	Sunrise - 10:00	Wet
09:32:23	167	939	M	Adult	Sun	24.3	30.3	36.2	Open	N/A	Sunny	Towards The Sun	No Exposure	Foraging	Leaves	2022-04-03	Sunrise - 10:00	Wet
07:26:06	106	812	F	Adult	Eden	25.5	29.1	33.5	Open	N/A	Sunny	Towards The Sun	Fully Exposed	Vigilant	N/A	2022-09-03	Sunrise - 10:00	Wet
07:27:52	21	812	F	Adult	Eden	25.5	29.1	33.5	Open	N/A	Sunny	Directly Away From The Sun	Fully Exposed	Inactive	N/A	2022-09-03	Sunrise - 10:00	Wet
07:28:13	113	812	F	Adult	Eden	25.5	29.1	33.5	Open	N/A	Sunny	Directly Away From The Sun	Partially Exposed	Foraging	Leaves	2022-09-03	Sunrise - 10:00	Wet
07:30:06	21	812	F	Adult	Eden	25.5	29.1	33.5	Open	N/A	Sunny	Partially Away From The Sun	Partially Exposed	Moving	N/A	2022-09-03	Sunrise - 10:00	Wet
07:30:27	161	812	F	Adult	Eden	25.5	29.1	33.5	Open	N/A	Sunny	Partially Away From The Sun	Partially Exposed	Vigilant	N/A	2022-09-03	Sunrise - 10:00	Wet
07:33:08	95	812	F	Adult	Eden	25.5	29.1	33.5	Open	N/A	Sunny	Partially Away From The Sun	Partially Exposed	Inactive	N/A	2022-09-03	Sunrise - 10:00	Wet
07:34:43	164	812	F	Adult	Eden	25.5	29.1	33.5	Open	N/A	Sunny	Directly Away From The Sun	No Exposure	Inactive	N/A	2022-09-03	Sunrise - 10:00	Wet
07:37:27	21	812	F	Adult	Eden	25.5	29.1	33.5	Open	N/A	Cloudy	Directly Away From The Sun	Cloudy Day	Inactive	N/A	2022-09-03	Sunrise - 10:00	Wet
07:37:48	110	812	F	Adult	Eden	25.5	29.1	33.5	Open	N/A	Sunny	Directly Away From The Sun	Fully Exposed	Inactive	N/A	2022-09-03	Sunrise - 10:00	Wet
07:39:38	82	812	F	Adult	Eden	25.5	29.1	33.5	Open	N/A	Sunny	Directly Away From The Sun	Fully Exposed	Moving	N/A	2022-09-03	Sunrise - 10:00	Wet
07:41:35	39	764	M	Juvenile	Equinox	25.5	29.1	33.5	Open	N/A	Sunny	Partially Away From The Sun	Fully Exposed	Moving	N/A	2022-09-03	Sunrise - 10:00	Wet
07:42:14	50	764	M	Juvenile	Equinox	25.5	29.1	33.5	Open	N/A	Sunny	Directly Away From The Sun	No Exposure	Inactive	N/A	2022-09-03	Sunrise - 10:00	Wet
07:43:04	91	764	M	Juvenile	Equinox	25.5	29.1	33.5	Open	N/A	Sunny	Partially Away From The Sun	Fully Exposed	Moving	N/A	2022-09-03	Sunrise - 10:00	Wet
07:44:35	55	764	M	Juvenile	Equinox	25.5	29.1	33.5	Open	N/A	Sunny	Directly Away From The Sun	Fully Exposed	Inactive	N/A	2022-09-03	Sunrise - 10:00	Wet
07:45:30	18	764	M	Juvenile	Equinox	25.5	29.1	33.5	Open	N/A	Sunny	Partially Away From The Sun	Fully Exposed	Moving	N/A	2022-09-03	Sunrise - 10:00	Wet
07:45:48	66	764	M	Juvenile	Equinox	25.5	29.1	33.5	Open	N/A	Sunny	Directly Away From The Sun	Fully Exposed	Moving	N/A	2022-09-03	Sunrise - 10:00	Wet
07:46:54	46	764	M	Juvenile	Equinox	25.5	29.1	33.5	Open	N/A	Sunny	Partially Away From The Sun	No Exposure	Inactive	N/A	2022-09-03	Sunrise - 10:00	Wet
07:47:40	22	764	M	Juvenile	Equinox	25.5	29.1	33.5	Open	N/A	Sunny	Partially Away From The Sun	Fully Exposed	Moving	N/A	2022-09-03	Sunrise - 10:00	Wet
07:48:02	20	764	M	Juvenile	Equinox	25.5	29.1	33.5	Open	N/A	Sunny	Partially Away From The Sun	Fully Exposed	Inactive	N/A	2022-09-03	Sunrise - 10:00	Wet
07:48:22	54	764	M	Juvenile	Equinox	25.5	29.1	33.5	Open	N/A	Sunny	Directly Away From The Sun	Fully Exposed	Moving	N/A	2022-09-03	Sunrise - 10:00	Wet
07:49:16	79	764	M	Juvenile	Equinox	25.5	29.1	33.5	Open	N/A	Sunny	Partially Away From The Sun	Fully Exposed	Vigilant	N/A	2022-09-03	Sunrise - 10:00	Wet
07:50:35	35	764	M	Juvenile	Equinox	25.5	29.1	33.5	Open	N/A	Sunny	Partially Away From The Sun	No Exposure	Inactive	N/A	2022-09-03	Sunrise - 10:00	Wet
07:51:10	59	764	M	Juvenile	Equinox	25.5	29.1	33.5	Open	N/A	Cloudy	Partially Away From The Sun	Cloudy Day	Inactive	N/A	2022-09-03	Sunrise - 10:00	Wet
07:52:09	19	764	M	Juvenile	Equinox	25.5	29.1	33.5	Open	N/A	Sunny	Directly Away From The Sun	Fully Exposed	Moving	N/A	2022-09-03	Sunrise - 10:00	Wet
07:52:28	22	764	M	Juvenile	Equinox	25.5	29.1	33.5	Open	N/A	Sunny	Directly Away From The Sun	Fully Exposed	Inactive	N/A	2022-09-03	Sunrise - 10:00	Wet
07:52:50	59	764	M	Juvenile	Equinox	25.5	29.1	33.5	Open	N/A	Sunny	Partially Away From The Sun	Fully Exposed	Moving	N/A	2022-09-03	Sunrise - 10:00	Wet
07:53:49	30	764	M	Juvenile	Equinox	25.5	29.1	33.5	Open	N/A	Sunny	Directly Away From The Sun	Fully Exposed	Inactive	N/A	2022-09-03	Sunrise - 10:00	Wet
07:54:19	101	764	M	Juvenile	Equinox	25.5	29.1	33.5	Open	N/A	Sunny	Partially Away From The Sun	No Exposure	Inactive	N/A	2022-09-03	Sunrise - 10:00	Wet
08:00:29	66	533	M	Adult	Melman	25.5	29.1	33.5	Road	N/A	Sunny	Directly Away From The Sun	Fully Exposed	Inactive	N/A	2022-09-03	Sunrise - 10:00	Wet
08:01:35	48	533	M	Adult	Melman	25.5	29.1	33.5	Road	N/A	Sunny	Partially Away From The Sun	Fully Exposed	Inactive	N/A	2022-09-03	Sunrise - 10:00	Wet
08:02:23	39	533	M	Adult	Melman	25.5	29.1	33.5	Road	N/A	Sunny	Directly Away From The Sun	Fully Exposed	Moving	N/A	2022-09-03	Sunrise - 10:00	Wet
08:03:02	45	533	M	Adult	Melman	25.5	29.1	33.5	Closed	N/A	Sunny	Directly Away From The Sun	No Exposure	Moving	N/A	2022-09-03	Sunrise - 10:00	Wet
08:03:47	53	533	M	Adult	Melman	25.5	29.1	33.5	Closed	N/A	Sunny	Directly Away From The Sun	Fully Exposed	Moving	N/A	2022-09-03	Sunrise - 10:00	Wet
08:04:40	30	533	M	Adult	Melman	25.5	29.1	33.5	Closed	N/A	Sunny	Partially Away From The Sun	Fully Exposed	Inactive	N/A	2022-09-03	Sunrise - 10:00	Wet
08:05:10	104	533	M	Adult	Melman	25.5	29.1	33.5	Closed	N/A	Sunny	Directly Away From The Sun	Partially Exposed	Moving	N/A	2022-09-03	Sunrise - 10:00	Wet
08:06:54	56	533	M	Adult	Melman	25.5	29.1	33.5	Closed	N/A	Cloudy	Partially Away From The Sun	Partially Exposed	Interacting	N/A	2022-09-03	Sunrise - 10:00	Wet
08:07:50	31	533	M	Adult	Melman	25.5	29.1	33.5	Closed	N/A	Sunny	Towards The Sun	Partially Exposed	Inactive	N/A	2022-09-03	Sunrise - 10:00	Wet
08:08:21	34	533	M	Adult	Melman	25.5	29.1	33.5	Closed	N/A	Cloudy	Towards The Sun	Cloudy Day	Interacting	N/A	2022-09-03	Sunrise - 10:00	Wet
08:08:55	27	533	M	Adult	Melman	25.5	29.1	33.5	Closed	N/A	Sunny	Partially Away From The Sun	Fully Exposed	Inactive	N/A	2022-09-03	Sunrise - 10:00	Wet
08:09:22	38	533	M	Adult	Melman	25.5	29.1	33.5	Closed	N/A	Sunny	Partially Away From The Sun	Fully Exposed	Moving	N/A	2022-09-03	Sunrise - 10:00	Wet
08:11:22	53	772	M	Adult	Polp	25.5	29.1	33.5	Closed	N/A	Cloudy	Towards The Sun	Cloudy Day	Inactive	N/A	2022-09-03	Sunrise - 10:00	Wet
08:12:15	37	772	M	Adult	Polp	25.5	29.1	33.5	Closed	N/A	Sunny	Towards The Sun	Fully Exposed	Vigilant	N/A	2022-09-03	Sunrise - 10:00	Wet
08:12:52	39	772	M	Adult	Polp	25.5	29.1	33.5	Closed	N/A	Sunny	Towards The Sun	Fully Exposed	Inactive	N/A	2022-09-03	Sunrise - 10:00	Wet
08:13:31	49	772	M	Adult	Polp	25.5	29.1	33.5	Closed	N/A	Sunny	Partially Away From The Sun	Fully Exposed	Inactive	N/A	2022-09-03	Sunrise - 10:00	Wet
08:14:20	18	772	M	Adult	Polp	25.5	29.1	33.5	Closed	N/A	Cloudy	Towards The Sun	Cloudy Day	Inactive	N/A	2022-09-03	Sunrise - 10:00	Wet
08:14:38	73	772	M	Adult	Polp	25.5	29.1	33.5	Closed	N/A	Sunny	Partially Away From The Sun	Fully Exposed	Inactive	N/A	2022-09-03	Sunrise - 10:00	Wet
08:15:51	99	772	M	Adult	Polp	25.5	29.1	33.5	Closed	N/A	Sunny	Towards The Sun	Fully Exposed	Inactive	N/A	2022-09-03	Sunrise - 10:00	Wet
08:17:30	24	772	M	Adult	Polp	25.5	29.1	33.5	Closed	N/A	Sunny	Directly Away From The Sun	Fully Exposed	Moving	N/A	2022-09-03	Sunrise - 10:00	Wet
08:17:54	38	772	M	Adult	Polp	25.5	29.1	33.5	Closed	N/A	Sunny	Partially Away From The Sun	Fully Exposed	Moving	N/A	2022-09-03	Sunrise - 10:00	Wet
08:18:32	79	772	M	Adult	Polp	25.5	29.1	33.5	Closed	N/A	Sunny	Partially Away From The Sun	Partially Exposed	Foraging	Leaves	2022-09-03	Sunrise - 10:00	Wet
08:19:51	172	772	M	Adult	Polp	25.5	29.1	33.5	Closed	N/A	Cloudy	Partially Away From The Sun	Cloudy Day	Foraging	Leaves	2022-09-03	Sunrise - 10:00	Wet
08:22:43	91	772	M	Adult	Polp	25.5	29.1	33.5	Closed	N/A	Sunny	Directly Away From The Sun	Partially Exposed	Foraging	Leaves	2022-09-03	Sunrise - 10:00	Wet
08:24:14	106	772	M	Adult	Polp	25.5	29.1	33.5	Closed	N/A	Cloudy	Directly Away From The Sun	Cloudy Day	Foraging	Leaves	2022-09-03	Sunrise - 10:00	Wet
17:04:08	70	837	M	Adult	Lethabo	33.2	31.3	33.5	Open	N/A	Sunny	Partially Away From The Sun	Fully Exposed	Moving	N/A	2022-09-03	16:00 - Sunset	Wet
17:05:18	124	837	M	Adult	Lethabo	33.2	31.3	33.5	Open	N/A	Sunny	Directly Away From The Sun	Fully Exposed	Inactive	N/A	2022-09-03	16:00 - Sunset	Wet
17:07:22	76	837	M	Adult	Lethabo	33.2	31.3	33.5	Open	N/A	Sunny	Towards The Sun	Fully Exposed	Moving	N/A	2022-09-03	16:00 - Sunset	Wet
17:08:38	19	837	M	Adult	Lethabo	33.2	31.3	33.5	Open	N/A	Sunny	Partially Away From The Sun	Fully Exposed	Moving	N/A	2022-09-03	16:00 - Sunset	Wet
17:08:57	66	837	M	Adult	Lethabo	33.2	31.3	33.5	Open	N/A	Sunny	Towards The Sun	Fully Exposed	Moving	N/A	2022-09-03	16:00 - Sunset	Wet
17:10:03	204	837	M	Adult	Lethabo	33.2	31.3	33.5	Open	N/A	Sunny	Partially Away From The Sun	Partially Exposed	Foraging	Leaves	2022-09-03	16:00 - Sunset	Wet
17:13:27	56	837	M	Adult	Lethabo	33.2	31.3	33.5	Open	N/A	Sunny	Directly Away From The Sun	Partially Exposed	Inactive	N/A	2022-09-03	16:00 - Sunset	Wet
17:14:23	23	837	M	Adult	Lethabo	33.2	31.3	33.5	Open	N/A	Sunny	Towards The Sun	Fully Exposed	Moving	N/A	2022-09-03	16:00 - Sunset	Wet
17:14:46	21	837	M	Adult	Lethabo	33.2	31.3	33.5	Open	N/A	Sunny	Partially Away From The Sun	Fully Exposed	Moving	N/A	2022-09-03	16:00 - Sunset	Wet
17:15:07	118	837	M	Adult	Lethabo	33.2	31.3	33.5	Open	N/A	Sunny	Directly Away From The Sun	Fully Exposed	Inactive	N/A	2022-09-03	16:00 - Sunset	Wet
17:18:05	45	837	M	Adult	Lethabo	33.2	31.3	33.5	Open	N/A	Sunny	Partially Away From The Sun	Fully Exposed	Moving	N/A	2022-09-03	16:00 - Sunset	Wet
17:19:30	107	909	M	Adult	McFly	33.2	31.3	33.5	Closed	N/A	Sunny	Partially Away From The Sun	Partially Exposed	Moving	N/A	2022-09-03	16:00 - Sunset	Wet
17:21:17	45	909	M	Adult	McFly	33.2	31.3	33.5	Closed	N/A	Sunny	Towards The Sun	No Exposure	Foraging	Leaves	2022-09-03	16:00 - Sunset	Wet
17:22:02	114	909	M	Adult	McFly	33.2	31.3	33.5	Closed	N/A	Sunny	Partially Away From The Sun	Partially Exposed	Moving	N/A	2022-09-03	16:00 - Sunset	Wet
17:23:56	21	909	M	Adult	McFly	33.2	31.3	33.5	Closed	N/A	Sunny	Partially Away From The Sun	Partially Exposed	Inactive	N/A	2022-09-03	16:00 - Sunset	Wet
17:24:17	58	909	M	Adult	McFly	33.2	31.3	33.5	Road	N/A	Sunny	Directly Away From The Sun	Fully Exposed	Moving	N/A	2022-09-03	16:00 - Sunset	Wet
17:25:15	31	909	M	Adult	McFly	33.2	31.3	33.5	Road	N/A	Sunny	Partially Away From The Sun	Partially Exposed	Foraging	Leaves	2022-09-03	16:00 - Sunset	Wet
17:25:46	136	909	M	Adult	McFly	33.2	31.3	33.5	Road	N/A	Sunny	Towards The Sun	No Exposure	Foraging	Leaves	2022-09-03	16:00 - Sunset	Wet
17:28:02	96	909	M	Adult	McFly	33.2	31.3	33.5	Road	N/A	Sunny	Partially Away From The Sun	No Exposure	Foraging	Leaves	2022-09-03	16:00 - Sunset	Wet
17:29:38	18	909	M	Adult	McFly	33.2	31.3	33.5	Road	N/A	Sunny	Directly Away From The Sun	Partially Exposed	Moving	N/A	2022-09-03	16:00 - Sunset	Wet
17:29:56	61	909	M	Adult	McFly	33.2	31.3	33.5	Road	N/A	Sunny	Towards The Sun	Partially Exposed	Foraging	Leaves	2022-09-03	16:00 - Sunset	Wet
17:30:57	29	909	M	Adult	McFly	33.2	31.3	33.5	Closed	N/A	Sunny	Partially Away From The Sun	Partially Exposed	Moving	N/A	2022-09-03	16:00 - Sunset	Wet
17:31:26	63	909	M	Adult	McFly	33.2	31.3	33.5	Closed	N/A	Sunny	Towards The Sun	No Exposure	Foraging	Leaves	2022-09-03	16:00 - Sunset	Wet
17:32:29	18	909	M	Adult	McFly	33.2	31.3	33.5	Closed	N/A	Sunny	Partially Away From The Sun	Partially Exposed	Moving	N/A	2022-09-03	16:00 - Sunset	Wet
17:32:47	22	909	M	Adult	McFly	33.2	31.3	33.5	Closed	N/A	Sunny	Partially Away From The Sun	No Exposure	Foraging	Leaves	2022-09-03	16:00 - Sunset	Wet
17:33:09	90	909	M	Adult	McFly	33.2	31.3	33.5	Closed	N/A	Sunny	Towards The Sun	Partially Exposed	Foraging	Leaves	2022-09-03	16:00 - Sunset	Wet
17:34:39	21	909	M	Adult	McFly	33.2	31.3	33.5	Closed	N/A	Sunny	Towards The Sun	Partially Exposed	Moving	N/A	2022-09-03	16:00 - Sunset	Wet
15:59:33	175	927	M	Adult	Aquarius	32.2	31.6	33.9	Road	N/A	Sunny	Towards The Sun	Fully Exposed	Inactive	N/A	2022-12-03	16:00 - Sunset	Wet
16:02:28	27	927	M	Adult	Aquarius	32.2	31.6	33.9	Road	N/A	Sunny	Directly Away From The Sun	Fully Exposed	Moving	N/A	2022-12-03	16:00 - Sunset	Wet
16:02:55	64	927	M	Adult	Aquarius	32.2	31.6	33.9	Road	N/A	Sunny	Directly Away From The Sun	Partially Exposed	Inactive	N/A	2022-12-03	16:00 - Sunset	Wet
16:03:59	61	927	M	Adult	Aquarius	32.2	31.6	33.9	Road	N/A	Sunny	Directly Away From The Sun	Fully Exposed	Moving	N/A	2022-12-03	16:00 - Sunset	Wet
16:05:00	100	927	M	Adult	Aquarius	32.2	31.6	33.9	Road	N/A	Sunny	Partially Away From The Sun	Partially Exposed	Inactive	N/A	2022-12-03	16:00 - Sunset	Wet
16:06:40	123	927	M	Adult	Aquarius	32.2	31.6	33.9	Road	N/A	Sunny	Partially Away From The Sun	Fully Exposed	Vigilant	N/A	2022-12-03	16:00 - Sunset	Wet
16:08:43	367	927	M	Adult	Aquarius	32.2	31.6	33.9	Road	N/A	Cloudy	Partially Away From The Sun	Cloudy Day	Inactive	N/A	2022-12-03	16:00 - Sunset	Wet
16:15:59	645	901	M	Adult	Lovely	32.2	31.6	33.9	Road	N/A	Sunny	Towards The Sun	Fully Exposed	Inactive	N/A	2022-12-03	16:00 - Sunset	Wet
16:26:44	256	901	M	Adult	Lovely	32.2	31.6	33.9	Road	N/A	Cloudy	Towards The Sun	Cloudy Day	Inactive	N/A	2022-12-03	16:00 - Sunset	Wet
16:31:03	324	837	M	Adult	McFly	32.2	31.6	33.9	Road	N/A	Cloudy	Towards The Sun	Cloudy Day	Inactive	N/A	2022-12-03	16:00 - Sunset	Wet
16:36:27	83	837	M	Adult	McFly	32.2	31.6	33.9	Road	N/A	Cloudy	Partially Away From The Sun	Cloudy Day	Inactive	N/A	2022-12-03	16:00 - Sunset	Wet
16:37:50	76	837	M	Adult	McFly	32.2	31.6	33.9	Road	N/A	Cloudy	Directly Away From The Sun	Cloudy Day	Moving	N/A	2022-12-03	16:00 - Sunset	Wet
16:39:06	37	837	M	Adult	McFly	32.2	31.6	33.9	Road	N/A	Sunny	Partially Away From The Sun	No Exposure	Inactive	N/A	2022-12-03	16:00 - Sunset	Wet
16:39:43	265	837	M	Adult	McFly	32.2	31.6	33.9	Road	N/A	Cloudy	Partially Away From The Sun	Cloudy Day	Inactive	N/A	2022-12-03	16:00 - Sunset	Wet
16:44:08	44	837	M	Adult	McFly	32.2	31.6	33.9	Road	N/A	Sunny	Directly Away From The Sun	Partially Exposed	Moving	N/A	2022-12-03	16:00 - Sunset	Wet
16:44:52	8	837	M	Adult	McFly	32.2	31.6	33.9	Closed	N/A	Sunny	Partially Away From The Sun	Partially Exposed	Moving	N/A	2022-12-03	16:00 - Sunset	Wet
16:45:33	35	627	M	Adult	Kevin	32.2	31.6	33.9	Road	N/A	Sunny	Directly Away From The Sun	Partially Exposed	Moving	N/A	2022-12-03	16:00 - Sunset	Wet
16:46:08	21	627	M	Adult	Kevin	32.2	31.6	33.9	Road	N/A	Sunny	Directly Away From The Sun	Partially Exposed	Inactive	N/A	2022-12-03	16:00 - Sunset	Wet
16:46:29	50	627	M	Adult	Kevin	32.2	31.6	33.9	Road	N/A	Sunny	Directly Away From The Sun	Fully Exposed	Moving	N/A	2022-12-03	16:00 - Sunset	Wet
16:47:19	315	627	M	Adult	Kevin	32.2	31.6	33.9	Closed	N/A	Sunny	Partially Away From The Sun	Partially Exposed	Foraging	Leaves	2022-12-03	16:00 - Sunset	Wet
16:52:34	27	627	M	Adult	Kevin	32.2	31.6	33.9	Closed	N/A	Sunny	Directly Away From The Sun	Partially Exposed	Moving	N/A	2022-12-03	16:00 - Sunset	Wet
16:53:01	98	627	M	Adult	Kevin	32.2	31.6	33.9	Closed	N/A	Sunny	Directly Away From The Sun	Partially Exposed	Foraging	Leaves	2022-12-03	16:00 - Sunset	Wet
16:54:39	26	627	M	Adult	Kevin	32.2	31.6	33.9	Closed	N/A	Sunny	Partially Away From The Sun	Partially Exposed	Foraging	Leaves	2022-12-03	16:00 - Sunset	Wet
16:55:05	44	627	M	Adult	Kevin	32.2	31.6	33.9	Closed	N/A	Sunny	Directly Away From The Sun	Partially Exposed	Moving	N/A	2022-12-03	16:00 - Sunset	Wet
16:55:49	11	627	M	Adult	Kevin	32.2	31.6	33.9	Closed	N/A	Sunny	Partially Away From The Sun	Partially Exposed	Moving	N/A	2022-12-03	16:00 - Sunset	Wet
16:51:02	672	898	F	Juvenile	Medea	34.2	29.5	35.1	Open	N/A	Overcast	Towards The Sun	Cloudy Day	Inactive	N/A	03/15/2022	16:00 - Sunset	Wet
17:02:14	22	898	F	Juvenile	Medea	34.2	29.5	35.1	Open	N/A	Overcast	Towards The Sun	Cloudy Day	Moving	N/A	03/15/2022	16:00 - Sunset	Wet
17:02:36	56	898	F	Juvenile	Medea	34.2	29.5	35.1	Open	N/A	Overcast	Partially Away From The Sun	Cloudy Day	Inactive	N/A	03/15/2022	16:00 - Sunset	Wet
17:03:32	60	898	F	Juvenile	Medea	34.2	29.5	35.1	Open	N/A	Overcast	Towards The Sun	Cloudy Day	Moving	N/A	03/15/2022	16:00 - Sunset	Wet
17:04:32	88	898	F	Juvenile	Medea	34.2	29.5	35.1	Open	N/A	Overcast	Towards The Sun	Cloudy Day	Inactive	N/A	03/15/2022	16:00 - Sunset	Wet
17:07:51	59	729	F	Adult	Madame Butterfly	34.2	29.5	35.1	Open	N/A	Overcast	Partially Away From The Sun	Cloudy Day	Inactive	N/A	03/15/2022	16:00 - Sunset	Wet
17:08:50	62	729	F	Adult	Madame Butterfly	34.2	29.5	35.1	Open	N/A	Overcast	Towards The Sun	Cloudy Day	Moving	N/A	03/15/2022	16:00 - Sunset	Wet
17:09:52	40	729	F	Adult	Madame Butterfly	34.2	29.5	35.1	Open	N/A	Overcast	Towards The Sun	Cloudy Day	Inactive	N/A	03/15/2022	16:00 - Sunset	Wet
17:10:32	21	729	F	Adult	Madame Butterfly	34.2	29.5	35.1	Open	N/A	Overcast	Towards The Sun	Cloudy Day	Moving	N/A	03/15/2022	16:00 - Sunset	Wet
17:10:53	74	729	F	Adult	Madame Butterfly	34.2	29.5	35.1	Open	N/A	Overcast	Partially Away From The Sun	Cloudy Day	Foraging	Leaves	03/15/2022	16:00 - Sunset	Wet
17:12:07	16	729	F	Adult	Madame Butterfly	34.2	29.5	35.1	Open	N/A	Overcast	Towards The Sun	Cloudy Day	Inactive	N/A	03/15/2022	16:00 - Sunset	Wet
17:13:23	157	729	F	Adult	Madame Butterfly	34.2	29.5	35.1	Open	N/A	Overcast	Partially Away From The Sun	Cloudy Day	Inactive	N/A	03/15/2022	16:00 - Sunset	Wet
17:16:00	102	729	F	Adult	Madame Butterfly	34.2	29.5	35.1	Closed	N/A	Overcast	Towards The Sun	Cloudy Day	Inactive	N/A	03/15/2022	16:00 - Sunset	Wet
17:17:42	58	729	F	Adult	Madame Butterfly	34.2	29.5	35.1	Closed	N/A	Overcast	Partially Away From The Sun	Cloudy Day	Vigilant	N/A	03/15/2022	16:00 - Sunset	Wet
17:18:40	40	729	F	Adult	Madame Butterfly	34.2	29.5	35.1	Closed	N/A	Overcast	Towards The Sun	Cloudy Day	Moving	N/A	03/15/2022	16:00 - Sunset	Wet
17:19:20	27	729	F	Adult	Madame Butterfly	34.2	29.5	35.1	Closed	N/A	Overcast	Partially Away From The Sun	Cloudy Day	Vigilant	N/A	03/15/2022	16:00 - Sunset	Wet
17:19:47	13	729	F	Adult	Madame Butterfly	34.2	29.5	35.1	Closed	N/A	Overcast	Towards The Sun	Cloudy Day	Moving	N/A	03/15/2022	16:00 - Sunset	Wet
17:34:03	87	657	M	Juvenile	Kaleb	34.2	29.5	35.1	Open	N/A	Overcast	N/A	Cloudy Day	Moving	N/A	03/15/2022	16:00 - Sunset	Wet
17:35:30	511	657	M	Juvenile	Kaleb	34.2	29.5	35.1	Open	N/A	Overcast	N/A	Cloudy Day	Foraging	Leaves	03/15/2022	16:00 - Sunset	Wet
17:44:01	59	657	M	Juvenile	Kaleb	34.2	29.5	35.1	Closed	N/A	Overcast	N/A	Cloudy Day	Moving	N/A	03/15/2022	16:00 - Sunset	Wet
17:45:09	54	891	M	Adult	Sun	34.2	29.5	35.1	Road	N/A	Overcast	N/A	Cloudy Day	Moving	N/A	03/15/2022	16:00 - Sunset	Wet
17:46:03	74	891	M	Adult	Sun	34.2	29.5	35.1	Road	N/A	Overcast	N/A	Cloudy Day	Interacting	N/A	03/15/2022	16:00 - Sunset	Wet
17:47:17	24	891	M	Adult	Sun	34.2	29.5	35.1	Road	N/A	Overcast	N/A	Cloudy Day	Inactive	N/A	03/15/2022	16:00 - Sunset	Wet
17:47:41	29	891	M	Adult	Sun	34.2	29.5	35.1	Road	N/A	Overcast	N/A	Cloudy Day	Moving	N/A	03/15/2022	16:00 - Sunset	Wet
17:48:10	110	891	M	Adult	Sun	34.2	29.5	35.1	Road	N/A	Overcast	N/A	Cloudy Day	Foraging	Leaves	03/15/2022	16:00 - Sunset	Wet
16:12:05	298	895	M	Juvenile	Kaleb	25.4	24.8	27.2	Open	N/A	Overcast	N/A	Cloudy Day	Inactive	N/A	03/16/2022	16:00 - Sunset	Wet
16:17:03	22	895	M	Juvenile	Kaleb	25.4	24.8	27.2	Open	N/A	Overcast	N/A	Cloudy Day	Foraging	Bone	03/16/2022	16:00 - Sunset	Wet
16:17:25	156	895	M	Juvenile	Kaleb	25.4	24.8	27.2	Open	N/A	Overcast	N/A	Cloudy Day	Inactive	N/A	03/16/2022	16:00 - Sunset	Wet
16:20:01	29	895	M	Juvenile	Kaleb	25.4	24.8	27.2	Open	N/A	Overcast	N/A	Cloudy Day	Moving	N/A	03/16/2022	16:00 - Sunset	Wet
16:20:30	41	895	M	Juvenile	Kaleb	25.4	24.8	27.2	Open	N/A	Overcast	N/A	Cloudy Day	Inactive	N/A	03/16/2022	16:00 - Sunset	Wet
16:21:11	77	895	M	Juvenile	Kaleb	25.4	24.8	27.2	Open	N/A	Overcast	N/A	Cloudy Day	Foraging	Leaves	03/16/2022	16:00 - Sunset	Wet
16:22:28	97	895	M	Juvenile	Kaleb	25.4	24.8	27.2	Open	N/A	Overcast	N/A	Cloudy Day	Moving	N/A	03/16/2022	16:00 - Sunset	Wet
16:24:05	21	895	M	Juvenile	Kaleb	25.4	24.8	27.2	Open	N/A	Overcast	N/A	Cloudy Day	Inactive	N/A	03/16/2022	16:00 - Sunset	Wet
16:24:26	83	895	M	Juvenile	Kaleb	25.4	24.8	27.2	Open	N/A	Overcast	N/A	Cloudy Day	Foraging	Leaves	03/16/2022	16:00 - Sunset	Wet
16:25:49	25	895	M	Juvenile	Kaleb	25.4	24.8	27.2	Open	N/A	Overcast	N/A	Cloudy Day	Moving	N/A	03/16/2022	16:00 - Sunset	Wet
16:26:14	45	895	M	Juvenile	Kaleb	25.4	24.8	27.2	Open	N/A	Overcast	N/A	Cloudy Day	Foraging	Leaves	03/16/2022	16:00 - Sunset	Wet
16:26:59	1	895	M	Juvenile	Kaleb	25.4	24.8	27.2	Open	N/A	Overcast	N/A	Cloudy Day	Moving	N/A	03/16/2022	16:00 - Sunset	Wet
16:27:19	881	881	M	Juvenile	Felix	25.4	24.8	27.2	Open	N/A	Overcast	N/A	Cloudy Day	Inactive	N/A	03/16/2022	16:00 - Sunset	Wet
16:47:00	62	960	F	Adult	Sophie	28.8	26.6	32.3	Closed	N/A	Sunny	Directly Away From The Sun	Partially Exposed	Moving	N/A	03/21/2022	16:00 - Sunset	Wet
16:48:02	471	960	F	Adult	Sophie	28.8	26.6	32.3	Closed	N/A	Sunny	Towards The Sun	Partially Exposed	Inactive	N/A	03/21/2022	16:00 - Sunset	Wet
16:55:53	77	960	F	Adult	Sophie	28.8	26.6	32.3	Closed	N/A	Sunny	Partially Away From The Sun	Fully Exposed	Moving	N/A	03/21/2022	16:00 - Sunset	Wet
16:57:10	74	960	F	Adult	Sophie	28.8	26.6	32.3	Road	N/A	Sunny	Directly Away From The Sun	Fully Exposed	Moving	N/A	03/21/2022	16:00 - Sunset	Wet
16:58:24	78	960	F	Adult	Sophie	28.8	26.6	32.3	Closed	N/A	Sunny	Partially Away From The Sun	No Exposure	Moving	N/A	03/21/2022	16:00 - Sunset	Wet
16:59:42	38	960	F	Adult	Sophie	28.8	26.6	32.3	Open	N/A	Sunny	Partially Away From The Sun	Fully Exposed	Moving	N/A	03/21/2022	16:00 - Sunset	Wet
17:00:20	29	960	F	Adult	Sophie	28.8	26.6	32.3	Open	N/A	Sunny	Towards The Sun	Fully Exposed	Inactive	N/A	03/21/2022	16:00 - Sunset	Wet
17:00:49	53	960	F	Adult	Sophie	28.8	26.6	32.3	Open	N/A	Sunny	Towards The Sun	Fully Exposed	Moving	N/A	03/21/2022	16:00 - Sunset	Wet
17:01:42	78	960	F	Adult	Sophie	28.8	26.6	32.3	Open	N/A	Sunny	Towards The Sun	Fully Exposed	Inactive	N/A	03/21/2022	16:00 - Sunset	Wet
17:46:41	72	679	F	Adult	Flower	28.8	26.6	32.3	Closed	N/A	Sunny	Towards The Sun	Partially Exposed	Vigilant	N/A	03/21/2022	16:00 - Sunset	Wet
17:47:53	322	679	F	Adult	Flower	28.8	26.6	32.3	Closed	N/A	Sunny	Towards The Sun	No Exposure	Foraging	Leaves	03/21/2022	16:00 - Sunset	Wet
17:53:15	63	679	F	Adult	Flower	28.8	26.6	32.3	Closed	N/A	Sunny	Partially Away From The Sun	No Exposure	Moving	N/A	03/21/2022	16:00 - Sunset	Wet
17:54:18	21	679	F	Adult	Flower	28.8	26.6	32.3	Closed	N/A	Sunny	Towards The Sun	Partially Exposed	Moving	N/A	03/21/2022	16:00 - Sunset	Wet
17:54:39	155	679	F	Adult	Flower	28.8	26.6	32.3	Closed	N/A	Sunny	Towards The Sun	Partially Exposed	Vigilant	N/A	03/21/2022	16:00 - Sunset	Wet
17:57:14	26	679	F	Adult	Flower	28.8	26.6	32.3	Closed	N/A	Sunny	Towards The Sun	Partially Exposed	Foraging	Leaves	03/21/2022	16:00 - Sunset	Wet
17:57:40	20	679	F	Adult	Flower	28.8	26.6	32.3	Closed	N/A	Sunny	Towards The Sun	Partially Exposed	Moving	N/A	03/21/2022	16:00 - Sunset	Wet
16:26:40	212	860	M	Adult	Lethabo	29.1	26.7	31.4	Road	N/A	Sunny	Towards The Sun	Fully Exposed	Vigilant	N/A	03/22/2022	16:00 - Sunset	Wet
16:30:12	22	860	M	Adult	Lethabo	29.1	26.7	31.4	Road	N/A	Sunny	Towards The Sun	Fully Exposed	Moving	N/A	03/22/2022	16:00 - Sunset	Wet
16:30:34	125	860	M	Adult	Lethabo	29.1	26.7	31.4	Road	N/A	Sunny	Towards The Sun	Partially Exposed	Inactive	N/A	03/22/2022	16:00 - Sunset	Wet
16:32:39	116	860	M	Adult	Lethabo	29.1	26.7	31.4	Road	N/A	Cloudy	Towards The Sun	Cloudy Day	Inactive	N/A	03/22/2022	16:00 - Sunset	Wet
16:34:35	26	860	M	Adult	Lethabo	29.1	26.7	31.4	Road	N/A	Sunny	Towards The Sun	Fully Exposed	Inactive	N/A	03/22/2022	16:00 - Sunset	Wet
16:35:01	46	860	M	Adult	Lethabo	29.1	26.7	31.4	Open	N/A	Sunny	Towards The Sun	Fully Exposed	Moving	N/A	03/22/2022	16:00 - Sunset	Wet
16:35:47	286	860	M	Adult	Lethabo	29.1	26.7	31.4	Open	N/A	Sunny	Partially Away From The Sun	Partially Exposed	Foraging	Leaves	03/22/2022	16:00 - Sunset	Wet
16:40:33	87	860	M	Adult	Lethabo	29.1	26.7	31.4	Open	N/A	Sunny	Partially Away From The Sun	Fully Exposed	Foraging	Leaves	03/22/2022	16:00 - Sunset	Wet
16:42:47	122	913	M	Adult	Vejay	29.1	26.7	31.4	Open	N/A	Sunny	Towards The Sun	Fully Exposed	Inactive	N/A	03/22/2022	16:00 - Sunset	Wet
16:44:49	80	913	M	Adult	Vejay	29.1	26.7	31.4	Open	N/A	Sunny	Towards The Sun	Fully Exposed	Vigilant	N/A	03/22/2022	16:00 - Sunset	Wet
16:46:09	146	913	M	Adult	Vejay	29.1	26.7	31.4	Open	N/A	Sunny	Towards The Sun	Partially Exposed	Vigilant	N/A	03/22/2022	16:00 - Sunset	Wet
16:48:35	17	913	M	Adult	Vejay	29.1	26.7	31.4	Open	N/A	Sunny	Towards The Sun	Partially Exposed	Inactive	N/A	03/22/2022	16:00 - Sunset	Wet
16:48:52	142	913	M	Adult	Vejay	29.1	26.7	31.4	Open	N/A	Sunny	Towards The Sun	Partially Exposed	Foraging	Leaves	03/22/2022	16:00 - Sunset	Wet
16:51:14	20	913	M	Adult	Vejay	29.1	26.7	31.4	Open	N/A	Sunny	Towards The Sun	Fully Exposed	Inactive	N/A	03/22/2022	16:00 - Sunset	Wet
16:51:34	94	913	M	Adult	Vejay	29.1	26.7	31.4	Open	N/A	Sunny	Partially Away From The Sun	Fully Exposed	Foraging	Leaves	03/22/2022	16:00 - Sunset	Wet
16:53:08	42	913	M	Adult	Vejay	29.1	26.7	31.4	Open	N/A	Cloudy	Partially Away From The Sun	Cloudy Day	Foraging	Leaves	03/22/2022	16:00 - Sunset	Wet
16:53:50	20	913	M	Adult	Vejay	29.1	26.7	31.4	Open	N/A	Cloudy	Directly Away From The Sun	Cloudy Day	Inactive	N/A	03/22/2022	16:00 - Sunset	Wet
16:54:10	188	913	M	Adult	Vejay	29.1	26.7	31.4	Open	N/A	Cloudy	Partially Away From The Sun	Cloudy Day	Foraging	Leaves	03/22/2022	16:00 - Sunset	Wet
16:57:18	42	913	M	Adult	Vejay	29.1	26.7	31.4	Open	N/A	Sunny	Partially Away From The Sun	Fully Exposed	Foraging	Leaves	03/22/2022	16:00 - Sunset	Wet
16:58:20	64	880	M	Adult	McFly	29.1	26.7	31.4	Open	N/A	Sunny	Partially Away From The Sun	Partially Exposed	Foraging	Leaves	03/22/2022	16:00 - Sunset	Wet
16:59:24	22	880	M	Adult	McFly	29.1	26.7	31.4	Open	N/A	Cloudy	Partially Away From The Sun	Cloudy Day	Foraging	Leaves	03/22/2022	16:00 - Sunset	Wet
16:59:46	51	880	M	Adult	McFly	29.1	26.7	31.4	Open	N/A	Cloudy	Directly Away From The Sun	Cloudy Day	Foraging	Leaves	03/22/2022	16:00 - Sunset	Wet
17:00:37	150	880	M	Adult	McFly	29.1	26.7	31.4	Open	N/A	Cloudy	Partially Away From The Sun	Cloudy Day	Foraging	Leaves	03/22/2022	16:00 - Sunset	Wet
17:03:07	56	880	M	Adult	McFly	29.1	26.7	31.4	Open	N/A	Cloudy	Towards The Sun	Cloudy Day	Foraging	Leaves	03/22/2022	16:00 - Sunset	Wet
17:04:03	53	880	M	Adult	McFly	29.1	26.7	31.4	Open	N/A	Sunny	Towards The Sun	Partially Exposed	Foraging	Leaves	03/22/2022	16:00 - Sunset	Wet
17:04:56	132	880	M	Adult	McFly	29.1	26.7	31.4	Road	N/A	Sunny	Towards The Sun	Fully Exposed	Foraging	Leaves	03/22/2022	16:00 - Sunset	Wet
17:07:08	34	880	M	Adult	McFly	29.1	26.7	31.4	Open	N/A	Sunny	Towards The Sun	No Exposure	Moving	N/A	03/22/2022	16:00 - Sunset	Wet
17:07:42	318	880	M	Adult	McFly	29.1	26.7	31.4	Open	N/A	Sunny	Towards The Sun	Partially Exposed	Foraging	Leaves	03/22/2022	16:00 - Sunset	Wet
17:13:08	31	892	M	Adult	Forest	29.1	26.7	31.4	Open	N/A	Sunny	Towards The Sun	Partially Exposed	Moving	N/A	03/22/2022	16:00 - Sunset	Wet
17:13:39	54	892	M	Adult	Forest	29.1	26.7	31.4	Open	N/A	Sunny	Partially Away From The Sun	No Exposure	Inactive	N/A	03/22/2022	16:00 - Sunset	Wet
17:14:33	20	892	M	Adult	Forest	29.1	26.7	31.4	Open	N/A	Sunny	Towards The Sun	Partially Exposed	Moving	N/A	03/22/2022	16:00 - Sunset	Wet
17:14:53	222	892	M	Adult	Forest	29.1	26.7	31.4	Open	N/A	Sunny	Towards The Sun	Partially Exposed	Foraging	Leaves	03/22/2022	16:00 - Sunset	Wet
17:18:35	78	892	M	Adult	Forest	29.1	26.7	31.4	Open	N/A	Sunny	Partially Away From The Sun	Partially Exposed	Foraging	Leaves	03/22/2022	16:00 - Sunset	Wet
17:19:53	26	892	M	Adult	Forest	29.1	26.7	31.4	Open	N/A	Sunny	Towards The Sun	Partially Exposed	Foraging	Leaves	03/22/2022	16:00 - Sunset	Wet
17:20:19	56	892	M	Adult	Forest	29.1	26.7	31.4	Open	N/A	Sunny	Towards The Sun	Partially Exposed	Foraging	Leaves	03/22/2022	16:00 - Sunset	Wet
17:21:15	17	892	M	Adult	Forest	29.1	26.7	31.4	Open	N/A	Sunny	Towards The Sun	Partially Exposed	Foraging	Leaves	03/22/2022	16:00 - Sunset	Wet
17:21:32	46	892	M	Adult	Forest	29.1	26.7	31.4	Open	N/A	Sunny	Partially Away From The Sun	Partially Exposed	Foraging	Leaves	03/22/2022	16:00 - Sunset	Wet
17:22:18	145	892	M	Adult	Forest	29.1	26.7	31.4	Open	N/A	Sunny	Partially Away From The Sun	No Exposure	Foraging	Leaves	03/22/2022	16:00 - Sunset	Wet
17:24:43	17	892	M	Adult	Forest	29.1	26.7	31.4	Open	N/A	Sunny	Partially Away From The Sun	Partially Exposed	Moving	N/A	03/22/2022	16:00 - Sunset	Wet
17:25:00	180	892	M	Adult	Forest	29.1	26.7	31.4	Open	N/A	Sunny	Towards The Sun	Partially Exposed	Foraging	Leaves	03/22/2022	16:00 - Sunset	Wet
07:24:47	191	913	M	Adult	Aquarius	18.1	23.2	29.8	Closed	N/A	Sunny	Towards The Sun	Partially Exposed	Inactive	N/A	03/23/2022	Sunrise - 10:00	Wet
07:27:58	57	913	M	Adult	Aquarius	18.1	23.2	29.8	Closed	N/A	Sunny	Towards The Sun	Partially Exposed	Moving	N/A	03/23/2022	Sunrise - 10:00	Wet
07:28:55	53	913	M	Adult	Aquarius	18.1	23.2	29.8	Closed	N/A	Sunny	Towards The Sun	Partially Exposed	Foraging	Leaves	03/23/2022	Sunrise - 10:00	Wet
07:29:48	47	913	M	Adult	Aquarius	18.1	23.2	29.8	Closed	N/A	Sunny	Towards The Sun	Partially Exposed	Moving	N/A	03/23/2022	Sunrise - 10:00	Wet
07:30:35	26	913	M	Adult	Aquarius	18.1	23.2	29.8	Closed	N/A	Sunny	Partially Away From The Sun	Partially Exposed	Moving	N/A	03/23/2022	Sunrise - 10:00	Wet
07:31:01	68	913	M	Adult	Aquarius	18.1	23.2	29.8	Closed	N/A	Sunny	Towards The Sun	Partially Exposed	Moving	N/A	03/23/2022	Sunrise - 10:00	Wet
07:32:09	36	913	M	Adult	Aquarius	18.1	23.2	29.8	Closed	N/A	Sunny	Towards The Sun	Partially Exposed	Inactive	N/A	03/23/2022	Sunrise - 10:00	Wet
07:32:45	61	913	M	Adult	Aquarius	18.1	23.2	29.8	Closed	N/A	Sunny	Directly Away From The Sun	Partially Exposed	Interacting	N/A	03/23/2022	Sunrise - 10:00	Wet
07:33:46	161	913	M	Adult	Aquarius	18.1	23.2	29.8	Closed	N/A	Sunny	Directly Away From The Sun	Fully Exposed	Inactive	N/A	03/23/2022	Sunrise - 10:00	Wet
07:36:27	213	913	M	Adult	Aquarius	18.1	23.2	29.8	Closed	N/A	Sunny	Towards The Sun	Fully Exposed	Inactive	N/A	03/23/2022	Sunrise - 10:00	Wet
07:41:52	53	608	M	Adult	Lethabo	18.1	23.2	29.8	Closed	N/A	Sunny	Towards The Sun	Partially Exposed	Inactive	N/A	03/23/2022	Sunrise - 10:00	Wet
07:42:45	55	608	M	Adult	Lethabo	18.1	23.2	29.8	Closed	N/A	Cloudy	Partially Away From The Sun	Cloudy Day	Moving	N/A	03/23/2022	Sunrise - 10:00	Wet
07:43:40	18	608	M	Adult	Lethabo	18.1	23.2	29.8	Closed	N/A	Cloudy	Towards The Sun	Cloudy Day	Moving	N/A	03/23/2022	Sunrise - 10:00	Wet
07:43:58	71	608	M	Adult	Lethabo	18.1	23.2	29.8	Closed	N/A	Cloudy	Partially Away From The Sun	Cloudy Day	Inactive	N/A	03/23/2022	Sunrise - 10:00	Wet
07:45:09	26	608	M	Adult	Lethabo	18.1	23.2	29.8	Closed	N/A	Sunny	Directly Away From The Sun	Fully Exposed	Vigilant	N/A	03/23/2022	Sunrise - 10:00	Wet
07:45:35	51	608	M	Adult	Lethabo	18.1	23.2	29.8	Closed	N/A	Sunny	Towards The Sun	Partially Exposed	Moving	N/A	03/23/2022	Sunrise - 10:00	Wet
07:46:26	29	608	M	Adult	Lethabo	18.1	23.2	29.8	Closed	N/A	Cloudy	Towards The Sun	Cloudy Day	Moving	N/A	03/23/2022	Sunrise - 10:00	Wet
07:46:55	29	608	M	Adult	Lethabo	18.1	23.2	29.8	Closed	N/A	Cloudy	Partially Away From The Sun	Cloudy Day	Moving	N/A	03/23/2022	Sunrise - 10:00	Wet
07:47:24	22	608	M	Adult	Lethabo	18.1	23.2	29.8	Road	N/A	Cloudy	Towards The Sun	Cloudy Day	Moving	N/A	03/23/2022	Sunrise - 10:00	Wet
07:47:46	45	608	M	Adult	Lethabo	18.1	23.2	29.8	Road	N/A	Sunny	Towards The Sun	Fully Exposed	Inactive	N/A	03/23/2022	Sunrise - 10:00	Wet
07:48:31	43	608	M	Adult	Lethabo	18.1	23.2	29.8	Road	N/A	Sunny	Partially Away From The Sun	Fully Exposed	Moving	N/A	03/23/2022	Sunrise - 10:00	Wet
07:49:14	26	608	M	Adult	Lethabo	18.1	23.2	29.8	Closed	N/A	Sunny	Towards The Sun	Partially Exposed	Foraging	Leaves	03/23/2022	Sunrise - 10:00	Wet
07:49:40	44	608	M	Adult	Lethabo	18.1	23.2	29.8	Closed	N/A	Sunny	Towards The Sun	Partially Exposed	Moving	N/A	03/23/2022	Sunrise - 10:00	Wet
07:50:24	24	608	M	Adult	Lethabo	18.1	23.2	29.8	Closed	N/A	Sunny	Partially Away From The Sun	Partially Exposed	Foraging	Leaves	03/23/2022	Sunrise - 10:00	Wet
07:50:48	51	608	M	Adult	Lethabo	18.1	23.2	29.8	Closed	N/A	Sunny	Towards The Sun	Partially Exposed	Moving	N/A	03/23/2022	Sunrise - 10:00	Wet
07:51:39	21	608	M	Adult	Lethabo	18.1	23.2	29.8	Closed	N/A	Sunny	Partially Away From The Sun	Partially Exposed	Inactive	N/A	03/23/2022	Sunrise - 10:00	Wet
07:53:42	76	558	M	Adult	Forest	18.1	23.2	29.8	Closed	N/A	Sunny	Partially Away From The Sun	No Exposure	Inactive	N/A	03/23/2022	Sunrise - 10:00	Wet
07:54:58	76	558	M	Adult	Forest	18.1	23.2	29.8	Closed	N/A	Sunny	Towards The Sun	Partially Exposed	Moving	N/A	03/23/2022	Sunrise - 10:00	Wet
07:56:14	66	558	M	Adult	Forest	18.1	23.2	29.8	Closed	N/A	Sunny	Partially Away From The Sun	Partially Exposed	Moving	N/A	03/23/2022	Sunrise - 10:00	Wet
07:57:20	56	558	M	Adult	Forest	18.1	23.2	29.8	Closed	N/A	Cloudy	Directly Away From The Sun	Cloudy Day	Inactive	N/A	03/23/2022	Sunrise - 10:00	Wet
07:58:16	42	558	M	Adult	Forest	18.1	23.2	29.8	Closed	N/A	Sunny	Towards The Sun	Partially Exposed	Moving	N/A	03/23/2022	Sunrise - 10:00	Wet
07:58:58	84	558	M	Adult	Forest	18.1	23.2	29.8	Closed	N/A	Sunny	Towards The Sun	Partially Exposed	Vigilant	N/A	03/23/2022	Sunrise - 10:00	Wet
08:00:22	32	558	M	Adult	Forest	18.1	23.2	29.8	Closed	N/A	Sunny	Towards The Sun	No Exposure	Moving	N/A	03/23/2022	Sunrise - 10:00	Wet
08:00:54	18	558	M	Adult	Forest	18.1	23.2	29.8	Closed	N/A	Sunny	Partially Away From The Sun	No Exposure	Inactive	N/A	03/23/2022	Sunrise - 10:00	Wet
08:01:12	38	558	M	Adult	Forest	18.1	23.2	29.8	Closed	N/A	Sunny	Towards The Sun	Partially Exposed	Moving	N/A	03/23/2022	Sunrise - 10:00	Wet
08:01:50	34	558	M	Adult	Forest	18.1	23.2	29.8	Closed	N/A	Sunny	Towards The Sun	Partially Exposed	Inactive	N/A	03/23/2022	Sunrise - 10:00	Wet
08:02:24	36	558	M	Adult	Forest	18.1	23.2	29.8	Closed	N/A	Sunny	Partially Away From The Sun	Partially Exposed	Moving	N/A	03/23/2022	Sunrise - 10:00	Wet
16:45:58	149	782	M	Adult	Lethabo	28.2	26.8	29.8	Open	N/A	Cloudy	Towards The Sun	Cloudy Day	Inactive	N/A	3/23/2022	16:00 - Sunset	Wet
16:48:27	50	782	M	Adult	Lethabo	28.2	26.8	29.8	Open	N/A	Cloudy	Directly Away From The Sun	Cloudy Day	Foraging	Leaves	3/23/2022	16:00 - Sunset	Wet
16:49:17	22	782	M	Adult	Lethabo	28.2	26.8	29.8	Open	N/A	Cloudy	Directly Away From The Sun	Cloudy Day	Moving	N/A	3/23/2022	16:00 - Sunset	Wet
16:49:39	41	782	M	Adult	Lethabo	28.2	26.8	29.8	Open	N/A	Cloudy	Partially Away From The Sun	Cloudy Day	Moving	N/A	3/23/2022	16:00 - Sunset	Wet
16:50:20	25	782	M	Adult	Lethabo	28.2	26.8	29.8	Open	N/A	Cloudy	Partially Away From The Sun	Cloudy Day	Inactive	N/A	3/23/2022	16:00 - Sunset	Wet
16:50:45	21	782	M	Adult	Lethabo	28.2	26.8	29.8	Open	N/A	Cloudy	Directly Away From The Sun	Cloudy Day	Moving	N/A	3/23/2022	16:00 - Sunset	Wet
16:51:06	43	782	M	Adult	Lethabo	28.2	26.8	29.8	Open	N/A	Cloudy	Partially Away From The Sun	Cloudy Day	Inactive	N/A	3/23/2022	16:00 - Sunset	Wet
16:51:49	17	782	M	Adult	Lethabo	28.2	26.8	29.8	Open	N/A	Cloudy	Directly Away From The Sun	Cloudy Day	Moving	N/A	3/23/2022	16:00 - Sunset	Wet
16:52:06	32	782	M	Adult	Lethabo	28.2	26.8	29.8	Open	N/A	Cloudy	Partially Away From The Sun	Cloudy Day	Inactive	N/A	3/23/2022	16:00 - Sunset	Wet
16:52:38	21	782	M	Adult	Lethabo	28.2	26.8	29.8	Open	N/A	Cloudy	Partially Away From The Sun	Cloudy Day	Foraging	Leaves	3/23/2022	16:00 - Sunset	Wet
16:52:59	37	782	M	Adult	Lethabo	28.2	26.8	29.8	Open	N/A	Cloudy	Partially Away From The Sun	Cloudy Day	Moving	N/A	3/23/2022	16:00 - Sunset	Wet
[truncated: 129 more rows]

## Sheet: Bastien
Time	Behaviour Dur (Sec)	Focal Dur (Sec)	Sex	Age	Name	Start Temp (C)	End Temp (C)	Max Temp (C)	Area	Wind	Weather	Position	Exposure	Behaviour	Food	Date	Session	Season
08:00:53	158.08	1031.62	F	Adult	Kagiso	15.7	21.5	31.4	Open	N/A	Sunny	Toward the Sun	Fully Exposed	Foraging	Branches	20/09/2021	Morning	Dry
08:12:14	29	1031.62	F	Adult	Kagiso	15.7	21.5	31.4	Open	N/A	Sunny	Partially Away From the Sun	No Exposure	Foraging	Branches	20/09/2021	Morning	Dry
08:13:23	50.98	1031.62	F	Adult	Kagiso	15.7	21.5	31.4	Open	N/A	Sunny	Partially Away From the Sun	No Exposure	Foraging	Branches	20/09/2021	Morning	Dry
08:25:06	139.14	1031.62	F	Sub-Adult	Walter	15.7	21.5	31.4	Open	N/A	Sunny	Toward the Sun	Fully Exposed	Foraging	Branches	20/09/2021	Morning	Dry
08:25:51	50.49	1031.62	F	Sub-Adult	Walter	15.7	21.5	31.4	Open	N/A	Sunny	Toward the Sun	Fully Exposed	Foraging	Branches	20/09/2021	Morning	Dry
08:42:02	38.07	1031.62	F	Sub-Adult	Walter	15.7	21.5	31.4	Open	N/A	Sunny	Partially Away From the Sun	Fully Exposed	Foraging	Branches	20/09/2021	Morning	Dry
08:43:56	316.14	1031.62	F	Sub-Adult	Walter	15.7	21.5	31.4	Open	N/A	Sunny	Partially Away From the Sun	Fully Exposed	Foraging	Branches	20/09/2021	Morning	Dry
08:44:47	140.12	1031.62	F	Sub-Adult	Walter	15.7	21.5	31.4	Open	N/A	Sunny	Partially Away From the Sun	Fully Exposed	Foraging	Branches	20/09/2021	Morning	Dry
08:52:19	97.63	1031.62	F	Adult	Nala	15.7	21.5	31.4	Open	N/A	Sunny	Partially Away From the Sun	Fully Exposed	Foraging	Branches	20/09/2021	Morning	Dry
09:03:26	11.97	1031.62	F	Adult	Nala	15.7	21.5	31.4	Closed	N/A	Sunny	Partially Away From the Sun	Partially Exposed	Foraging	Branches	20/09/2021	Morning	Dry
14:07:29	156.38	1031.62	F	Adult	Vendetta	30	31.1	31.4	Closed	N/A	Sunny	Toward the Sun	Partially Exposed	Foraging	Branches	20/09/2021	Afternoon	Dry
14:08:25	72.35	1031.62	F	Adult	Vendetta	30	31.1	31.4	Closed	N/A	Sunny	Toward the Sun	Partially Exposed	Foraging	Branches	20/09/2021	Afternoon	Dry
14:09:07	23.94	1031.62	F	Adult	Vendetta	30	31.1	31.4	Closed	N/A	Sunny	Toward the Sun	Partially Exposed	Foraging	Branches	20/09/2021	Afternoon	Dry
14:09:52	30.95	1031.62	F	Adult	Vendetta	30	31.1	31.4	Closed	N/A	Sunny	Toward the Sun	Partially Exposed	Foraging	Branches	20/09/2021	Afternoon	Dry
14:10:39	20.02	1031.62	F	Adult	Vendetta	30	31.1	31.4	Closed	N/A	Sunny	Toward the Sun	No Exposure	Foraging	Branches	20/09/2021	Afternoon	Dry
14:11:16	72.44	1031.62	F	Adult	Vendetta	30	31.1	31.4	Closed	N/A	Sunny	Toward the Sun	No Exposure	Foraging	Branches	20/09/2021	Afternoon	Dry
17:15:13	30.25	1031.62	M	Adult	Sun	33.8	27.1	33.9	Road	N/A	Sunny	Partially Away From the Sun	No Exposure	Foraging	Leaves	21/09/2021	Evening	Dry
17:16:02	45.07	1031.62	M	Adult	Sun	33.8	27.1	33.9	Road	N/A	Sunny	Partially Away From the Sun	No Exposure	Foraging	Leaves	21/09/2021	Evening	Dry
17:16:50	90.82	1031.62	M	Adult	Sun	33.8	27.1	33.9	Road	N/A	Sunny	Partially Away From the Sun	No Exposure	Foraging	Branches	21/09/2021	Evening	Dry
17:52:50	18.93	1031.62	M	Adult	Sun	33.8	27.1	33.9	Closed	N/A	Sunny	Partially Away From the Sun	No Exposure	Foraging	Branches	21/09/2021	Evening	Dry
17:53:40	24.66	1031.62	M	Adult	Sun	33.8	27.1	33.9	Closed	N/A	Sunny	Partially Away From the Sun	No Exposure	Foraging	Branches	21/09/2021	Evening	Dry
17:54:31	15.81	1031.62	M	Adult	Sun	33.8	27.1	33.9	Closed	N/A	Sunny	Partially Away From the Sun	No Exposure	Foraging	Branches	21/09/2021	Evening	Dry
07:30:24	156.27	1031.62	M	Adult	Melman	21.1	22.9	26.4	Closed	N/A	Overcast	Cloudy Day	Cloudy Day	Foraging	Branches	22/09/2021	Morning	Dry
08:03:13	156.27	1031.62	M	Adult	Melman	21.1	22.9	26.4	Closed	N/A	Overcast	Cloudy Day	Cloudy Day	Foraging	Branches	22/09/2021	Morning	Dry
08:03:47	36.69	1031.62	M	Adult	Melman	21.1	22.9	26.4	Closed	N/A	Overcast	Cloudy Day	Cloudy Day	Foraging	Branches	22/09/2021	Morning	Dry
08:04:27	967.07	1031.62	M	Adult	Melman	21.1	22.9	26.4	Closed	N/A	Overcast	Cloudy Day	Cloudy Day	Foraging	Branches	22/09/2021	Morning	Dry
08:05:20	67.34	1031.62	M	Adult	Melman	21.1	22.9	26.4	Closed	N/A	Overcast	Cloudy Day	Cloudy Day	Foraging	Branches	22/09/2021	Morning	Dry
08:05:57	331.92	1031.62	M	Adult	Melman	21.1	22.9	26.4	Closed	N/A	Overcast	Cloudy Day	Cloudy Day	Foraging	Branches	22/09/2021	Morning	Dry
08:06:36	56.76	1031.62	M	Adult	Melman	21.1	22.9	26.4	Closed	N/A	Overcast	Cloudy Day	Cloudy Day	Foraging	Branches	22/09/2021	Morning	Dry
08:07:20	176.61	1031.62	M	Adult	Melman	21.1	22.9	26.4	Closed	N/A	Overcast	Cloudy Day	Cloudy Day	Foraging	Branches	22/09/2021	Morning	Dry
09:26:38	115.4	1031.62	M	Adult	Vejay	21.1	22.9	26.4	Open	N/A	Overcast	Cloudy Day	Cloudy Day	Foraging	Branches	22/09/2021	Morning	Dry
09:27:08	7.8	1031.62	M	Adult	Vejay	21.1	22.9	26.4	Open	N/A	Overcast	Cloudy Day	Cloudy Day	Foraging	Branches	22/09/2021	Morning	Dry
09:31:54	32.76	1031.62	M	Adult	Aquarius	21.1	22.9	26.4	Closed	N/A	Overcast	Cloudy Day	Cloudy Day	Foraging	Branches	22/09/2021	Morning	Dry
09:32:24	15.25	1031.62	M	Adult	Aquarius	21.1	22.9	26.4	Closed	N/A	Overcast	Cloudy Day	Cloudy Day	Foraging	Branches	22/09/2021	Morning	Dry
09:42:38	59.31	1031.62	M	Adult	Vejay	21.1	22.9	26.4	Open	N/A	Overcast	Cloudy Day	Cloudy Day	Foraging	Leaves	22/09/2021	Morning	Dry
09:48:19	9.62	1031.62	M	Adult	Charlie	21.1	22.9	26.4	Open	N/A	Overcast	Cloudy Day	Cloudy Day	Foraging	Branches	22/09/2021	Morning	Dry
10:02:32	176.44	1031.62	M	Adult	Aquarius	21.1	22.9	26.4	Open	N/A	Overcast	Cloudy Day	Cloudy Day	Foraging	Leaves	22/09/2021	Morning	Dry
10:03:29	67.59	1031.62	M	Adult	Aquarius	21.1	22.9	26.4	Open	N/A	Overcast	Cloudy Day	Cloudy Day	Foraging	Leaves	22/09/2021	Morning	Dry
10:04:01	151.31	1031.62	M	Adult	Aquarius	21.1	22.9	26.4	Open	N/A	Overcast	Cloudy Day	Cloudy Day	Foraging	Leaves	22/09/2021	Morning	Dry
10:04:39	213.16	1031.62	M	Adult	Aquarius	21.1	22.9	26.4	Open	N/A	Overcast	Cloudy Day	Cloudy Day	Foraging	Leaves	22/09/2021	Morning	Dry
10:05:13	32.73	1031.62	M	Adult	Aquarius	21.1	22.9	26.4	Open	N/A	Overcast	Cloudy Day	Cloudy Day	Foraging	Leaves	22/09/2021	Morning	Dry
14:04:25	129.05	1031.62	M	Adult	Lovely	24.9	26.2	26.4	Closed	N/A	Cloudy	Toward the Sun	No Exposure	Foraging	Leaves	22/09/2021	Afternoon	Dry
14:19:07	147.13	1031.62	M	Adult	Lovely	24.9	26.2	26.4	Closed	N/A	Cloudy	Toward the Sun	Partially Exposed	Foraging	Branches	22/09/2021	Afternoon	Dry
14:23:53	55.18	1031.62	M	Adult	Lovely	24.9	26.2	26.4	Closed	N/A	Cloudy	Partially Away From the Sun	Fully Exposed	Foraging	Branches	22/09/2021	Afternoon	Dry
14:24:37	382.29	1031.62	M	Adult	Lovely	24.9	26.2	26.4	Closed	N/A	Cloudy	Partially Away From the Sun	Fully Exposed	Foraging	Branches	22/09/2021	Afternoon	Dry
14:25:40	11.91	1031.62	M	Adult	Lovely	24.9	26.2	26.4	Closed	N/A	Cloudy	Partially Away From the Sun	Fully Exposed	Foraging	Branches	22/09/2021	Afternoon	Dry
14:26:17	43.84	1031.62	M	Adult	Lovely	24.9	26.2	26.4	Closed	N/A	Cloudy	Toward the Sun	Fully Exposed	Foraging	Branches	22/09/2021	Afternoon	Dry
14:26:56	50.49	1031.62	M	Adult	Lovely	24.9	26.2	26.4	Closed	N/A	Cloudy	Partially Away From the Sun	Fully Exposed	Foraging	Branches	22/09/2021	Afternoon	Dry
11:23:04	264.99	1031.62	M	Adult	McFly	22.4	26.1	27.4	Open	N/A	Sunny	Directly Away From the Sun	Fully Exposed	Foraging	Leaves	23/09/2021	Afternoon	Dry
11:33:15	101.85	1031.62	M	Adult	McFly	22.4	26.1	27.4	Open	N/A	Sunny	Partially Away From the Sun	Fully Exposed	Foraging	Leaves	23/09/2021	Afternoon	Dry
11:56:33	28.98	1031.62	M	Adult	McFly	22.4	26.1	27.4	Open	N/A	Sunny	Toward the Sun	Partially Exposed	Foraging	Leaves	23/09/2021	Afternoon	Dry
12:07:51	207.32	1031.62	M	Adult	McFly	22.4	26.1	27.4	Open	N/A	Sunny	Partially Away From the Sun	Fully Exposed	Foraging	Leaves	23/09/2021	Afternoon	Dry
12:08:59	180.79	1031.62	M	Adult	McFly	22.4	26.1	27.4	Open	N/A	Sunny	Partially Away From the Sun	Fully Exposed	Foraging	Leaves	23/09/2021	Afternoon	Dry
12:09:49	145.72	1031.62	M	Adult	McFly	22.4	26.1	27.4	Open	N/A	Sunny	Directly Away From the Sun	Fully Exposed	Foraging	Leaves	23/09/2021	Afternoon	Dry
12:10:24	108.64	1031.62	M	Adult	McFly	22.4	26.1	27.4	Open	N/A	Sunny	Partially Away From the Sun	Fully Exposed	Foraging	Leaves	23/09/2021	Afternoon	Dry
12:11:13	49.93	1031.62	M	Adult	McFly	22.4	26.1	27.4	Open	N/A	Sunny	Toward the Sun	Partially Exposed	Foraging	Leaves	23/09/2021	Afternoon	Dry
12:12:18	94.89	1031.62	M	Adult	McFly	22.4	26.1	27.4	Open	N/A	Sunny	Toward the Sun	Partially Exposed	Foraging	Leaves	23/09/2021	Afternoon	Dry
12:13:10	260.5	1031.62	M	Adult	McFly	22.4	26.1	27.4	Open	N/A	Sunny	Toward the Sun	Partially Exposed	Foraging	Leaves	23/09/2021	Afternoon	Dry
12:13:49	110.84	1031.62	M	Adult	McFly	22.4	26.1	27.4	Open	N/A	Sunny	Toward the Sun	Partially Exposed	Foraging	Leaves	23/09/2021	Afternoon	Dry
12:14:27	554.69	1031.62	M	Adult	McFly	22.4	26.1	27.4	Open	N/A	Sunny	Partially Away From the Sun	Fully Exposed	Foraging	Leaves	23/09/2021	Afternoon	Dry
12:15:04	101.31	1031.62	M	Adult	McFly	22.4	26.1	27.4	Open	N/A	Sunny	Partially Away From the Sun	Partially Exposed	Foraging	Branches	23/09/2021	Afternoon	Dry
12:16:00	211.14	1031.62	M	Adult	McFly	22.4	26.1	27.4	Open	N/A	Sunny	Toward the Sun	Partially Exposed	Foraging	Branches	23/09/2021	Afternoon	Dry
12:16:41	19.45	1031.62	M	Adult	McFly	22.4	26.1	27.4	Open	N/A	Sunny	Toward the Sun	Partially Exposed	Foraging	Branches	23/09/2021	Afternoon	Dry
12:17:30	78.87	1031.62	M	Adult	McFly	22.4	26.1	27.4	Open	N/A	Sunny	Toward the Sun	Partially Exposed	Foraging	Branches	23/09/2021	Afternoon	Dry
12:18:13	81.86	1031.62	M	Adult	McFly	22.4	26.1	27.4	Open	N/A	Sunny	Toward the Sun	Fully Exposed	Foraging	Branches	23/09/2021	Afternoon	Dry
12:18:49	49.17	1031.62	M	Adult	McFly	22.4	26.1	27.4	Open	N/A	Sunny	Toward the Sun	Fully Exposed	Foraging	Branches	23/09/2021	Afternoon	Dry
12:19:24	385.47	1031.62	M	Adult	McFly	22.4	26.1	27.4	Open	N/A	Sunny	Partially Away From the Sun	Fully Exposed	Foraging	Branches	23/09/2021	Afternoon	Dry
12:20:01	31.58	1031.62	M	Adult	McFly	22.4	26.1	27.4	Open	N/A	Sunny	Directly Away From the Sun	Fully Exposed	Foraging	Branches	23/09/2021	Afternoon	Dry
12:20:43	36.77	1031.62	M	Adult	McFly	22.4	26.1	27.4	Open	N/A	Sunny	Partially Away From the Sun	Fully Exposed	Foraging	Branches	23/09/2021	Afternoon	Dry
12:21:22	271.67	1031.62	M	Adult	McFly	22.4	26.1	27.4	Road	N/A	Sunny	Partially Away From the Sun	Fully Exposed	Foraging	Branches	23/09/2021	Afternoon	Dry
12:22:00	27	1031.62	M	Adult	McFly	22.4	26.1	27.4	Road	N/A	Sunny	Toward the Sun	Fully Exposed	Foraging	Branches	23/09/2021	Afternoon	Dry
16:24:18	53.83	1031.62	F	Adult	Emma	27.3	25.4	27.4	Closed	N/A	Sunny	Toward the Sun	Fully Exposed	Foraging	Leaves	23/09/2021	Evening	Dry
16:24:50	55.64	1031.62	F	Adult	Emma	27.3	25.4	27.4	Closed	N/A	Sunny	Directly Away From the Sun	Partially Exposed	Foraging	Leaves	23/09/2021	Evening	Dry
16:00:16	51.69	1031.62	M	Juvenile	Felix	29.5	29.9	30.7	Open	N/A	Sunny	Partially Away From the Sun	Fully Exposed	Foraging	Branches	24/09/2021	Evening	Dry
16:00:59	98.88	1031.62	M	Juvenile	Felix	29.5	29.9	30.7	Open	N/A	Sunny	Directly Away From the Sun	Fully Exposed	Foraging	Branches	24/09/2021	Evening	Dry
16:01:42	61.9	1031.62	M	Juvenile	Felix	29.5	29.9	30.7	Open	N/A	Sunny	Directly Away From the Sun	Fully Exposed	Foraging	Branches	24/09/2021	Evening	Dry
16:02:27	9.92	1031.62	M	Juvenile	Felix	29.5	29.9	30.7	Open	N/A	Sunny	Directly Away From the Sun	Fully Exposed	Foraging	Branches	24/09/2021	Evening	Dry
16:03:09	37.2	1031.62	M	Juvenile	Felix	29.5	29.9	30.7	Open	N/A	Sunny	Directly Away From the Sun	Fully Exposed	Foraging	Branches	24/09/2021	Evening	Dry
16:04:00	13.86	1031.62	M	Juvenile	Felix	29.5	29.9	30.7	Open	N/A	Sunny	Directly Away From the Sun	Fully Exposed	Foraging	Branches	24/09/2021	Evening	Dry
16:04:47	27.01	1031.62	M	Juvenile	Felix	29.5	29.9	30.7	Open	N/A	Sunny	Partially Away From the Sun	Fully Exposed	Foraging	Branches	24/09/2021	Evening	Dry
16:05:24	10.77	1031.62	M	Juvenile	Felix	29.5	29.9	30.7	Open	N/A	Sunny	Directly Away From the Sun	Fully Exposed	Foraging	Branches	24/09/2021	Evening	Dry
16:05:58	116.06	1031.62	M	Juvenile	Felix	29.5	29.9	30.7	Open	N/A	Sunny	Partially Away From the Sun	Partially Exposed	Foraging	Branches	24/09/2021	Evening	Dry
16:06:31	48.19	1031.62	M	Juvenile	Felix	29.5	29.9	30.7	Open	N/A	Sunny	Toward the Sun	Partially Exposed	Foraging	Branches	24/09/2021	Evening	Dry
16:27:13	157.08	1031.62	M	Adult	Sun	29.5	29.9	30.7	Open	N/A	Sunny	Directly Away From the Sun	Fully Exposed	Foraging	Leaves	24/09/2021	Evening	Dry
16:27:47	27.37	1031.62	M	Adult	Sun	29.5	29.9	30.7	Open	N/A	Sunny	Directly Away From the Sun	Fully Exposed	Foraging	Leaves	24/09/2021	Evening	Dry
16:28:19	54.96	1031.62	M	Adult	Sun	29.5	29.9	30.7	Open	N/A	Sunny	Directly Away From the Sun	Fully Exposed	Foraging	Leaves	24/09/2021	Evening	Dry
16:28:56	34.56	1031.62	M	Adult	Sun	29.5	29.9	30.7	Open	N/A	Sunny	Partially Away From the Sun	Partially Exposed	Foraging	Leaves	24/09/2021	Evening	Dry
16:29:27	31.27	1031.62	M	Adult	Sun	29.5	29.9	30.7	Open	N/A	Sunny	Partially Away From the Sun	Partially Exposed	Foraging	Leaves	24/09/2021	Evening	Dry
16:30:01	57.03	1031.62	M	Adult	Sun	29.5	29.9	30.7	Open	N/A	Sunny	Partially Away From the Sun	Partially Exposed	Foraging	Leaves	24/09/2021	Evening	Dry
11:16:21	83.38	1031.62	M	Adult	McFly	28.5	33.7	34.1	Open	N/A	Sunny	Toward the Sun	Partially Exposed	Foraging	Branches	27/09/2021	Afternoon	Dry
11:16:56	97.47	1031.62	M	Adult	McFly	28.5	33.7	34.1	Open	N/A	Sunny	Toward the Sun	Partially Exposed	Foraging	Branches	27/09/2021	Afternoon	Dry
11:35:29	1151.09	1031.62	M	Adult	McFly	28.5	33.7	34.1	Open	N/A	Sunny	Toward the Sun	No Exposure	Foraging	Branches	27/09/2021	Afternoon	Dry
12:12:35	185.61	1031.62	M	Adult	McFly	28.5	33.7	34.1	Open	N/A	Sunny	Toward the Sun	No Exposure	Foraging	Leaves	27/09/2021	Afternoon	Dry
12:13:16	164.29	1031.62	M	Adult	McFly	28.5	33.7	34.1	Open	N/A	Sunny	Partially Away From the Sun	Partially Exposed	Foraging	Leaves	27/09/2021	Afternoon	Dry
12:14:04	485.95	1031.62	M	Adult	McFly	28.5	33.7	34.1	Open	N/A	Sunny	Partially Away From the Sun	Partially Exposed	Foraging	Branches	27/09/2021	Afternoon	Dry
12:14:45	241.76	1031.62	M	Adult	McFly	28.5	33.7	34.1	Open	N/A	Sunny	Toward the Sun	Partially Exposed	Foraging	Leaves	27/09/2021	Afternoon	Dry
12:15:34	94.75	1031.62	M	Adult	McFly	28.5	33.7	34.1	Open	N/A	Sunny	Partially Away From the Sun	Partially Exposed	Foraging	Branches	27/09/2021	Afternoon	Dry
12:16:24	567.96	1031.62	M	Adult	McFly	28.5	33.7	34.1	Open	N/A	Sunny	Directly Away From the Sun	Partially Exposed	Foraging	Branches	27/09/2021	Afternoon	Dry
17:33:13	447.88	1031.62	M	Adult	McFly	33.8	30.8	34.1	Open	N/A	Sunny	Partially Away From the Sun	No Exposure	Foraging	Leaves	27/09/2021	Evening	Dry
17:33:54	255	1031.62	M	Adult	McFly	33.8	30.8	34.1	Open	N/A	Sunny	Partially Away From the Sun	Partially Exposed	Foraging	Leaves	27/09/2021	Evening	Dry
17:34:24	84.15	1031.62	M	Adult	McFly	33.8	30.8	34.1	Open	N/A	Sunny	Partially Away From the Sun	Partially Exposed	Foraging	Leaves	27/09/2021	Evening	Dry
17:58:29	585.24	1031.62	M	Adult	Aquarius	33.8	30.8	34.1	Open	N/A	Sunny	Partially Away From the Sun	No Exposure	Foraging	Leaves	27/09/2021	Evening	Dry
07:37:41	352.55	1031.62	M	Adult	McFly	21.2	28	34.9	Open	N/A	Sunny	Partially Away From the Sun	Fully Exposed	Foraging	Leaves	28/09/2021	Morning	Dry
07:45:11	53.51	1031.62	M	Adult	McFly	21.2	28	34.9	Open	N/A	Sunny	Directly Away From the Sun	Partially Exposed	Foraging	Leaves	28/09/2021	Morning	Dry
07:45:50	95.22	1031.62	M	Adult	McFly	21.2	28	34.9	Open	N/A	Sunny	Partially Away From the Sun	Partially Exposed	Foraging	Leaves	28/09/2021	Morning	Dry
07:46:27	70.82	1031.62	M	Adult	McFly	21.2	28	34.9	Open	N/A	Sunny	Toward the Sun	Partially Exposed	Foraging	Leaves	28/09/2021	Morning	Dry
07:47:10	77.55	1031.62	M	Adult	McFly	21.2	28	34.9	Open	N/A	Sunny	Partially Away From the Sun	Fully Exposed	Foraging	Leaves	28/09/2021	Morning	Dry
08:31:47	42.54	1031.62	F	Adult	Kagiso	21.2	28	34.9	Open	N/A	Sunny	Partially Away From the Sun	Fully Exposed	Foraging	Leaves	28/09/2021	Morning	Dry
08:32:39	17.34	1031.62	F	Adult	Kagiso	21.2	28	34.9	Open	N/A	Sunny	Partially Away From the Sun	Fully Exposed	Foraging	Leaves	28/09/2021	Morning	Dry
08:33:19	92.75	1031.62	F	Adult	Kagiso	21.2	28	34.9	Open	N/A	Sunny	Directly Away From the Sun	Fully Exposed	Foraging	Leaves	28/09/2021	Morning	Dry
08:34:06	197.57	1031.62	F	Adult	Kagiso	21.2	28	34.9	Open	N/A	Sunny	Partially Away From the Sun	Fully Exposed	Foraging	Leaves	28/09/2021	Morning	Dry
08:34:44	33.79	1031.62	F	Adult	Kagiso	21.2	28	34.9	Open	N/A	Sunny	Partially Away From the Sun	Fully Exposed	Foraging	Leaves	28/09/2021	Morning	Dry
08:35:16	60.1	1031.62	F	Adult	Kagiso	21.2	28	34.9	Open	N/A	Sunny	Partially Away From the Sun	Partially Exposed	Foraging	Leaves	28/09/2021	Morning	Dry
08:48:58	346.24	1031.62	M	Adult	McFly	21.2	28	34.9	Open	N/A	Sunny	Partially Away From the Sun	Partially Exposed	Foraging	Leaves	28/09/2021	Morning	Dry
09:02:53	152.51	1031.62	M	Adult	McFly	21.2	28	34.9	Open	N/A	Sunny	Toward the Sun	No Exposure	Foraging	Leaves	28/09/2021	Morning	Dry
09:03:34	218.98	1031.62	M	Adult	McFly	21.2	28	34.9	Open	N/A	Sunny	Partially Away From the Sun	No Exposure	Foraging	Leaves	28/09/2021	Morning	Dry
10:54:11	330.93	1031.62	M	Adult	Polp	29.8	33.4	34.9	Road	N/A	Sunny	Toward the Sun	Partially Exposed	Foraging	Branches	29/09/2021	Morning	Dry
11:07:37	102.97	1031.62	M	Adult	Lovely	29.8	33.4	34.9	Closed	N/A	Sunny	Partially Away From the Sun	Fully Exposed	Foraging	Leaves	29/09/2021	Afternoon	Dry
11:08:15	121.9	1031.62	M	Adult	Lovely	29.8	33.4	34.9	Closed	N/A	Sunny	Partially Away From the Sun	Fully Exposed	Foraging	Leaves	29/09/2021	Afternoon	Dry
11:08:49	99.3	1031.62	M	Adult	Lovely	29.8	33.4	34.9	Closed	N/A	Sunny	Toward the Sun	Partially Exposed	Foraging	Leaves	29/09/2021	Afternoon	Dry
15:52:55	39.99	1031.62	F	Adult	Madame Butterfly	34.5	32.4	34.9	Closed	N/A	Sunny	Toward the Sun	Partially Exposed	Foraging	Leaves	29/09/2021	Evening	Dry
15:54:35	72.72	1031.62	F	Adult	Madame Butterfly	34.5	32.4	34.9	Closed	N/A	Sunny	Toward the Sun	Partially Exposed	Foraging	Leaves	29/09/2021	Evening	Dry
15:55:27	200.29	1031.62	F	Adult	Madame Butterfly	34.5	32.4	34.9	Closed	N/A	Sunny	Toward the Sun	Partially Exposed	Foraging	Leaves	29/09/2021	Evening	Dry
15:56:05	210.19	1031.62	F	Adult	Madame Butterfly	34.5	32.4	34.9	Closed	N/A	Sunny	Directly Away From the Sun	Partially Exposed	Foraging	Leaves	29/09/2021	Evening	Dry
15:56:45	13.52	1031.62	F	Adult	Madame Butterfly	34.5	32.4	34.9	Closed	N/A	Sunny	Partially Away From the Sun	Partially Exposed	Foraging	Leaves	29/09/2021	Evening	Dry
15:57:59	205.19	1031.62	F	Adult	Madame Butterfly	34.5	32.4	34.9	Road	N/A	Sunny	Partially Away From the Sun	No Exposure	Foraging	Leaves	29/09/2021	Evening	Dry
16:01:03	19.04	1031.62	F	Adult	Madame Butterfly	34.5	32.4	34.9	Open	N/A	Sunny	Partially Away From the Sun	Partially Exposed	Foraging	Leaves	29/09/2021	Evening	Dry
07:45:32	102.65	1031.62	M	Adult	Polp	24.1	24.2	30.4	Closed	N/A	Overcast	Cloudy Day	Cloudy Day	Foraging	Branches	30/09/2021	Morning	Dry
08:02:03	994.03	1031.62	M	Adult	Polp	24.1	24.2	30.4	Closed	N/A	Overcast	Cloudy Day	Cloudy Day	Foraging	Branches	30/09/2021	Morning	Dry
08:11:44	617.35	1031.62	M	Adult	Polp	24.1	24.2	30.4	Closed	N/A	Overcast	Cloudy Day	Cloudy Day	Foraging	Branches	30/09/2021	Morning	Dry
15:00:29	57.43	1031.62	F	Adult	Flower	25.9	27.8	30.4	Closed	N/A	Cloudy	Toward the Sun	Fully Exposed	Foraging	Branches	30/09/2021	Evening	Dry
15:01:06	39.13	1031.62	F	Adult	Flower	25.9	27.8	30.4	Closed	N/A	Cloudy	Toward the Sun	Fully Exposed	Foraging	Branches	30/09/2021	Evening	Dry
15:01:38	21.39	1031.62	F	Adult	Flower	25.9	27.8	30.4	Closed	N/A	Cloudy	Toward the Sun	Fully Exposed	Foraging	Branches	30/09/2021	Evening	Dry
15:02:15	125.24	1031.62	F	Adult	Flower	25.9	27.8	30.4	Closed	N/A	Cloudy	Toward the Sun	Fully Exposed	Foraging	Branches	30/09/2021	Evening	Dry
15:34:22	348.29	1031.62	M	Adult	Aquarius	25.9	27.8	30.4	Open	N/A	Cloudy	Directly Away From the Sun	No Exposure	Foraging	Leaves	30/09/2021	Evening	Dry
13:08:16	72.36	1031.62	M	Adult	Polp	28.9	33.1	33.4	Closed	N/A	Sunny	Toward the Sun	Partially Exposed	Foraging	Branches	03/10/2021	Afternoon	Wet
13:08:55	332.37	1031.62	M	Adult	Polp	28.9	33.1	33.4	Closed	N/A	Sunny	Toward the Sun	Partially Exposed	Foraging	Branches	03/10/2021	Afternoon	Wet
13:09:47	87.54	1031.62	M	Adult	Polp	28.9	33.1	33.4	Closed	N/A	Sunny	Partially Away From the Sun	Partially Exposed	Foraging	Branches	03/10/2021	Afternoon	Wet
13:10:32	294.19	1031.62	M	Adult	Polp	28.9	33.1	33.4	Closed	N/A	Sunny	Toward the Sun	Partially Exposed	Foraging	Branches	03/10/2021	Afternoon	Wet
13:11:04	130.39	1031.62	M	Adult	Polp	28.9	33.1	33.4	Closed	N/A	Sunny	Partially Away From the Sun	Partially Exposed	Foraging	Branches	03/10/2021	Afternoon	Wet
13:11:41	174.64	1031.62	M	Adult	Polp	28.9	33.1	33.4	Closed	N/A	Sunny	Directly Away From the Sun	Fully Exposed	Foraging	Branches	03/10/2021	Afternoon	Wet
13:12:21	319.41	1031.62	M	Adult	Polp	28.9	33.1	33.4	Closed	N/A	Sunny	Partially Away From the Sun	Partially Exposed	Foraging	Branches	03/10/2021	Afternoon	Wet
13:12:52	95.9	1031.62	M	Adult	Polp	28.9	33.1	33.4	Closed	N/A	Sunny	Directly Away From the Sun	Partially Exposed	Foraging	Branches	03/10/2021	Afternoon	Wet
13:13:24	30.15	1031.62	M	Adult	Polp	28.9	33.1	33.4	Closed	N/A	Sunny	Toward the Sun	Partially Exposed	Foraging	Branches	03/10/2021	Afternoon	Wet
10:46:28	25.91	1031.62	M	Adult	Aquarius	22.8	24.8	31.5	Closed	N/A	Overcast	Cloudy Day	Cloudy Day	Foraging	Branches	04/10/2021	Afternoon	Wet
10:50:58	233.04	1031.62	M	Adult	Aquarius	22.8	24.8	31.5	Closed	N/A	Overcast	Cloudy Day	Cloudy Day	Foraging	Leaves	04/10/2021	Afternoon	Wet
10:51:28	22.8	1031.62	M	Adult	Aquarius	22.8	24.8	31.5	Closed	N/A	Overcast	Cloudy Day	Cloudy Day	Foraging	Leaves	04/10/2021	Afternoon	Wet
11:01:19	128.53	1031.62	M	Adult	Aquarius	22.8	24.8	31.5	Open	N/A	Overcast	Cloudy Day	Cloudy Day	Foraging	Leaves	04/10/2021	Afternoon	Wet
11:11:17	72.85	1031.62	M	Adult	Aquarius	22.8	24.8	31.5	Open	N/A	Overcast	Cloudy Day	Cloudy Day	Foraging	Leaves	04/10/2021	Afternoon	Wet
11:22:22	81.34	1031.62	M	Juvenile	Napoleon	22.8	24.8	31.5	Open	N/A	Overcast	Cloudy Day	Cloudy Day	Foraging	Leaves	04/10/2021	Afternoon	Wet
11:38:11	17.03	1031.62	M	Adult	Aquarius	22.8	24.8	31.5	Open	N/A	Overcast	Cloudy Day	Cloudy Day	Foraging	Leaves	04/10/2021	Afternoon	Wet
11:54:19	70.86	1031.62	M	Juvenile	Napoleon	22.8	24.8	31.5	Open	N/A	Overcast	Cloudy Day	Cloudy Day	Foraging	Leaves	04/10/2021	Afternoon	Wet
11:55:01	38.95	1031.62	M	Juvenile	Napoleon	22.8	24.8	31.5	Open	N/A	Overcast	Cloudy Day	Cloudy Day	Foraging	Leaves	04/10/2021	Afternoon	Wet
12:34:53	2153.49	1031.62	M	Adult	Aquarius	22.8	24.8	31.5	Open	N/A	Overcast	Cloudy Day	Cloudy Day	Foraging	Leaves	04/10/2021	Afternoon	Wet
15:33:39	77.22	1031.62	F	Adult	Nala	24.2	23	31.5	Closed	N/A	Overcast	Cloudy Day	Cloudy Day	Foraging	Leaves	04/10/2021	Evening	Wet
16:16:40	315.62	1031.62	F	Adult	Nala	24.2	23	31.5	Closed	N/A	Overcast	Cloudy Day	Cloudy Day	Foraging	Leaves	04/10/2021	Evening	Wet
16:17:09	925.23	1031.62	F	Adult	Nala	24.2	23	31.5	Closed	N/A	Overcast	Cloudy Day	Cloudy Day	Foraging	Leaves	04/10/2021	Evening	Wet
16:47:44	22.01	1031.62	F	Adult	Nala	24.2	23	31.5	Closed	N/A	Overcast	Cloudy Day	Cloudy Day	Foraging	Branches	04/10/2021	Evening	Wet
17:25:03	403.44	1031.62	F	Adult	Nala	24.2	23	31.5	Closed	N/A	Overcast	Cloudy Day	Cloudy Day	Foraging	Branches	04/10/2021	Evening	Wet
17:25:38	54.01	1031.62	F	Adult	Nala	24.2	23	31.5	Closed	N/A	Overcast	Cloudy Day	Cloudy Day	Foraging	Branches	04/10/2021	Evening	Wet
17:26:08	283.96	1031.62	F	Adult	Nala	24.2	23	31.5	Closed	N/A	Overcast	Cloudy Day	Cloudy Day	Foraging	Branches	04/10/2021	Evening	Wet
17:26:44	43.41	1031.62	F	Adult	Nala	24.2	23	31.5	Closed	N/A	Overcast	Cloudy Day	Cloudy Day	Foraging	Branches	04/10/2021	Evening	Wet
17:27:18	542.22	1031.62	F	Adult	Nala	24.2	23	31.5	Closed	N/A	Overcast	Cloudy Day	Cloudy Day	Foraging	Branches	04/10/2021	Evening	Wet
08:13:18	305.21	1031.62	F	Adult	Madame Butterfly	21.1	23.4	27.6	Road	N/A	Overcast	Cloudy Day	Cloudy Day	Foraging	Leaves	05/10/2021	Morning	Wet
08:13:46	235.18	1031.62	F	Adult	Madame Butterfly	21.1	23.4	27.6	Road	N/A	Overcast	Cloudy Day	Cloudy Day	Foraging	Leaves	05/10/2021	Morning	Wet
08:15:00	18.95	1031.62	F	Adult	Madame Butterfly	21.1	23.4	27.6	Road	N/A	Overcast	Cloudy Day	Cloudy Day	Foraging	Leaves	05/10/2021	Morning	Wet
08:15:30	122.98	1031.62	F	Adult	Madame Butterfly	21.1	23.4	27.6	Road	N/A	Overcast	Cloudy Day	Cloudy Day	Foraging	Leaves	05/10/2021	Morning	Wet
08:20:03	30.41	1031.62	F	Adult	Emily	21.1	23.4	27.6	Road	N/A	Cloudy	Partially Away From the Sun	Fully Exposed	Foraging	Leaves	05/10/2021	Morning	Wet
08:30:34	64.05	1031.62	F	Adult	Emily	21.1	23.4	27.6	Closed	N/A	Cloudy	Toward the Sun	Partially Exposed	Foraging	Leaves	05/10/2021	Morning	Wet
08:33:40	54.29	1031.62	F	Adult	Emily	21.1	23.4	27.6	Closed	N/A	Overcast	Cloudy Day	Cloudy Day	Foraging	Leaves	05/10/2021	Morning	Wet
08:40:26	242.25	1031.62	F	Adult	Emily	21.1	23.4	27.6	Closed	N/A	Overcast	Cloudy Day	Cloudy Day	Foraging	Leaves	05/10/2021	Morning	Wet
08:55:22	768.81	1031.62	F	Adult	Emily	21.1	23.4	27.6	Closed	N/A	Overcast	Cloudy Day	Cloudy Day	Foraging	Leaves	05/10/2021	Morning	Wet
09:03:06	46.85	1031.62	F	Adult	Wolke	21.1	23.4	27.6	Road	N/A	Overcast	Cloudy Day	Cloudy Day	Foraging	Leaves	05/10/2021	Morning	Wet
09:04:11	28.59	1031.62	F	Adult	Emily	21.1	23.4	27.6	Road	N/A	Overcast	Cloudy Day	Cloudy Day	Foraging	Leaves	05/10/2021	Morning	Wet
09:29:44	356.42	1031.62	F	Adult	Wolke	21.1	23.4	27.6	Closed	N/A	Overcast	Cloudy Day	Cloudy Day	Foraging	Branches	05/10/2021	Morning	Wet
09:51:07	279.34	1031.62	M	Adult	Lovely	21.1	23.4	27.6	Open	N/A	Overcast	Cloudy Day	Cloudy Day	Foraging	Leaves	05/10/2021	Morning	Wet
09:54:17	78.57	1031.62	M	Adult	Lovely	21.1	23.4	27.6	Open	N/A	Overcast	Cloudy Day	Cloudy Day	Foraging	Branches	05/10/2021	Morning	Wet
09:56:28	86.83	1031.62	M	Adult	Lovely	21.1	23.4	27.6	Open	N/A	Cloudy	Toward the Sun	Partially Exposed	Foraging	Leaves	05/10/2021	Morning	Wet
13:18:04	168.72	1031.62	F	Adult	Flower	25.5	27.4	27.6	Open	N/A	Cloudy	Partially Away From the Sun	Partially Exposed	Foraging	Leaves	05/10/2021	Afternoon	Wet
13:25:55	309.72	1031.62	F	Adult	Flower	25.5	27.4	27.6	Open	N/A	Cloudy	Partially Away From the Sun	Fully Exposed	Foraging	Leaves	05/10/2021	Afternoon	Wet
13:26:37	57.94	1031.62	F	Adult	Flower	25.5	27.4	27.6	Open	N/A	Cloudy	Partially Away From the Sun	Fully Exposed	Foraging	Leaves	05/10/2021	Afternoon	Wet
13:49:07	115.67	1031.62	M	Juvenile	Felix	25.5	27.4	27.6	Open	N/A	Cloudy	Directly Away From the Sun	No Exposure	Foraging	Leaves	05/10/2021	Afternoon	Wet
13:49:55	81.04	1031.62	M	Juvenile	Felix	25.5	27.4	27.6	Open	N/A	Cloudy	Partially Away From the Sun	Fully Exposed	Foraging	Leaves	05/10/2021	Afternoon	Wet
13:50:49	55.93	1031.62	M	Juvenile	Felix	25.5	27.4	27.6	Open	N/A	Cloudy	Partially Away From the Sun	Fully Exposed	Foraging	Leaves	05/10/2021	Afternoon	Wet
13:51:28	311.86	1031.62	M	Juvenile	Felix	25.5	27.4	27.6	Open	N/A	Cloudy	Partially Away From the Sun	Fully Exposed	Foraging	Leaves	05/10/2021	Afternoon	Wet
13:52:04	26.53	1031.62	M	Juvenile	Felix	25.5	27.4	27.6	Open	N/A	Cloudy	Partially Away From the Sun	Fully Exposed	Foraging	Leaves	05/10/2021	Afternoon	Wet
13:52:47	284.84	1031.62	M	Juvenile	Felix	25.5	27.4	27.6	Open	N/A	Cloudy	Partially Away From the Sun	Fully Exposed	Foraging	Leaves	05/10/2021	Afternoon	Wet
14:08:48	18.9	1031.62	M	Juvenile	Felix	25.5	27.4	27.6	Open	N/A	Cloudy	Partially Away From the Sun	Fully Exposed	Foraging	Leaves	05/10/2021	Afternoon	Wet
14:09:32	114.71	1031.62	M	Juvenile	Felix	25.5	27.4	27.6	Open	N/A	Cloudy	Partially Away From the Sun	Partially Exposed	Foraging	Leaves	05/10/2021	Afternoon	Wet
14:10:22	51.19	1031.62	M	Juvenile	Felix	25.5	27.4	27.6	Open	N/A	Cloudy	Toward the Sun	Fully Exposed	Foraging	Leaves	05/10/2021	Afternoon	Wet
14:22:21	269.77	1031.62	F	Adult	Flower	25.5	27.4	27.6	Open	N/A	Cloudy	Partially Away From the Sun	Fully Exposed	Foraging	Leaves	05/10/2021	Afternoon	Wet
14:23:55	81.55	1031.62	F	Adult	Flower	25.5	27.4	27.6	Open	N/A	Cloudy	Partially Away From the Sun	No Exposure	Foraging	Leaves	05/10/2021	Afternoon	Wet
14:24:33	185.16	1031.62	F	Adult	Flower	25.5	27.4	27.6	Open	N/A	Cloudy	Partially Away From the Sun	No Exposure	Foraging	Leaves	05/10/2021	Afternoon	Wet
14:37:43	70.77	1031.62	F	Adult	Flower	25.5	27.4	27.6	Open	N/A	Cloudy	Partially Away From the Sun	No Exposure	Foraging	Leaves	05/10/2021	Afternoon	Wet
08:29:30	1298.39	1031.62	M	Adult	McFly	20.9	24.2	30	Open	N/A	Overcast	Cloudy Day	Cloudy Day	Foraging	Leaves	06/10/2021	Morning	Wet
09:07:16	2148.48	1031.62	M	Adult	McFly	20.9	24.2	30	Open	N/A	Overcast	Cloudy Day	Cloudy Day	Foraging	Leaves	06/10/2021	Morning	Wet
10:28:04	354.42	1031.62	M	Adult	Polp	20.9	24.2	30	Closed	N/A	Overcast	Cloudy Day	Cloudy Day	Foraging	Leaves	06/10/2021	Morning	Wet
14:02:46	187.07	1031.62	M	Adult	Sun	27.9	29.9	30	Road	N/A	Sunny	Toward the Sun	Partially Exposed	Foraging	Leaves	06/10/2021	Afternoon	Wet
14:03:25	104.61	1031.62	M	Adult	Sun	27.9	29.9	30	Road	N/A	Sunny	Partially Away From the Sun	Fully Exposed	Foraging	Leaves	06/10/2021	Afternoon	Wet
14:04:01	4.83	1031.62	M	Adult	Sun	27.9	29.9	30	Road	N/A	Sunny	Toward the Sun	Fully Exposed	Foraging	Leaves	06/10/2021	Afternoon	Wet
14:26:11	663.6	1031.62	M	Adult	Sun	27.9	29.9	30	Closed	N/A	Sunny	Partially Away From the Sun	Fully Exposed	Foraging	Leaves	06/10/2021	Afternoon	Wet
14:26:58	491.44	1031.62	M	Adult	Sun	27.9	29.9	30	Closed	N/A	Sunny	Directly Away From the Sun	Fully Exposed	Foraging	Leaves	06/10/2021	Afternoon	Wet
14:27:32	132.75	1031.62	M	Adult	Sun	27.9	29.9	30	Closed	N/A	Sunny	Partially Away From the Sun	Fully Exposed	Foraging	Leaves	06/10/2021	Afternoon	Wet
14:42:54	33.43	1031.62	M	Adult	Sun	27.9	29.9	30	Open	N/A	Sunny	Directly Away From the Sun	Fully Exposed	Foraging	Leaves	06/10/2021	Afternoon	Wet
14:46:21	46.2	1031.62	M	Adult	Sun	27.9	29.9	30	Open	N/A	Sunny	Partially Away From the Sun	Fully Exposed	Foraging	Branches	06/10/2021	Afternoon	Wet
14:47:13	33.91	1031.62	M	Adult	Sun	27.9	29.9	30	Open	N/A	Sunny	Partially Away From the Sun	Fully Exposed	Foraging	Branches	06/10/2021	Afternoon	Wet
14:47:50	79.98	1031.62	M	Adult	Sun	27.9	29.9	30	Open	N/A	Sunny	Partially Away From the Sun	Fully Exposed	Foraging	Branches	06/10/2021	Afternoon	Wet
07:43:32	53.13	1031.62	F	Adult	Flower	23.6	23.9	27.8	Open	N/A	Overcast	Cloudy Day	Cloudy Day	Foraging	Leaves	07/10/2021	Morning	Wet
07:49:14	301.91	1031.62	F	Adult	Nala	23.6	23.9	27.8	Open	N/A	Overcast	Cloudy Day	Cloudy Day	Foraging	Leaves	07/10/2021	Morning	Wet
07:49:53	57.5	1031.62	F	Adult	Nala	23.6	23.9	27.8	Open	N/A	Overcast	Cloudy Day	Cloudy Day	Foraging	Leaves	07/10/2021	Morning	Wet
07:53:20	39.66	1031.62	F	Adult	Nala	23.6	23.9	27.8	Open	N/A	Overcast	Cloudy Day	Cloudy Day	Foraging	Leaves	07/10/2021	Morning	Wet
07:54:55	82.6	1031.62	F	Adult	Nala	23.6	23.9	27.8	Open	N/A	Overcast	Cloudy Day	Cloudy Day	Foraging	Leaves	07/10/2021	Morning	Wet
07:55:25	22.38	1031.62	F	Adult	Nala	23.6	23.9	27.8	Open	N/A	Overcast	Cloudy Day	Cloudy Day	Foraging	Leaves	07/10/2021	Morning	Wet
07:57:56	128.12	1031.62	F	Adult	Nala	23.6	23.9	27.8	Open	N/A	Overcast	Cloudy Day	Cloudy Day	Foraging	Leaves	07/10/2021	Morning	Wet
08:06:06	102.16	1031.62	M	Juvenile	Felix	23.6	23.9	27.8	Open	N/A	Overcast	Cloudy Day	Cloudy Day	Foraging	Leaves	07/10/2021	Morning	Wet
08:06:38	19.16	1031.62	M	Juvenile	Felix	23.6	23.9	27.8	Open	N/A	Overcast	Cloudy Day	Cloudy Day	Foraging	Leaves	07/10/2021	Morning	Wet
08:07:10	16.53	1031.62	M	Juvenile	Felix	23.6	23.9	27.8	Open	N/A	Overcast	Cloudy Day	Cloudy Day	Foraging	Leaves	07/10/2021	Morning	Wet
08:09:54	661.33	1031.62	F	Adult	Flower	23.6	23.9	27.8	Open	N/A	Overcast	Cloudy Day	Cloudy Day	Foraging	Leaves	07/10/2021	Morning	Wet
08:19:59	329.33	1031.62	F	Adult	Nala	23.6	23.9	27.8	Open	N/A	Overcast	Cloudy Day	Cloudy Day	Foraging	Leaves	07/10/2021	Morning	Wet
08:35:33	131.02	1031.62	F	Adult	Nala	23.6	23.9	27.8	Open	N/A	Overcast	Cloudy Day	Cloudy Day	Foraging	Leaves	07/10/2021	Morning	Wet
09:03:31	55.02	1031.62	F	Adult	Madame Butterfly	23.6	23.9	27.8	Open	N/A	Overcast	Cloudy Day	Cloudy Day	Foraging	Branches	07/10/2021	Morning	Wet
09:04:10	125.06	1031.62	F	Adult	Flower	23.6	23.9	27.8	Open	N/A	Overcast	Cloudy Day	Cloudy Day	Foraging	Leaves	07/10/2021	Morning	Wet
09:04:43	95.88	1031.62	F	Adult	Flower	23.6	23.9	27.8	Open	N/A	Overcast	Cloudy Day	Cloudy Day	Foraging	Leaves	07/10/2021	Morning	Wet
09:05:16	456.46	1031.62	F	Adult	Flower	23.6	23.9	27.8	Open	N/A	Overcast	Cloudy Day	Cloudy Day	Foraging	Leaves	07/10/2021	Morning	Wet
09:05:50	37.01	1031.62	F	Adult	Madame Butterfly	23.6	23.9	27.8	Open	N/A	Overcast	Cloudy Day	Cloudy Day	Foraging	Leaves	07/10/2021	Morning	Wet
09:13:02	41.96	1031.62	F	Adult	Madame Butterfly	23.6	23.9	27.8	Open	N/A	Overcast	Cloudy Day	Cloudy Day	Foraging	Leaves	07/10/2021	Morning	Wet
13:26:58	105.91	1031.62	M	Adult	Dark Male	26.9	27.3	27.8	Road	N/A	Cloudy	Directly Away From the Sun	Fully Exposed	Foraging	Leaves	07/10/2021	Afternoon	Wet
13:29:05	51.28	1031.62	M	Adult	Dark Male	26.9	27.3	27.8	Open	N/A	Cloudy	Toward the Sun	Fully Exposed	Foraging	Leaves	07/10/2021	Afternoon	Wet
13:29:49	258.56	1031.62	M	Adult	Dark Male	26.9	27.3	27.8	Open	N/A	Cloudy	Partially Away From the Sun	Fully Exposed	Foraging	Leaves	07/10/2021	Afternoon	Wet
13:45:33	431.65	1031.62	M	Adult	Dark Male	26.9	27.3	27.8	Open	N/A	Cloudy	Partially Away From the Sun	Fully Exposed	Foraging	Leaves	07/10/2021	Afternoon	Wet
13:47:56	467.38	1031.62	M	Adult	Dark Male	26.9	27.3	27.8	Open	N/A	Cloudy	Partially Away From the Sun	Fully Exposed	Foraging	Leaves	07/10/2021	Afternoon	Wet
13:48:58	461.02	1031.62	M	Adult	Dark Male	26.9	27.3	27.8	Open	N/A	Cloudy	Partially Away From the Sun	Partially Exposed	Foraging	Leaves	07/10/2021	Afternoon	Wet
13:54:38	51.9	1031.62	M	Adult	Dark Male	26.9	27.3	27.8	Open	N/A	Cloudy	Directly Away From the Sun	Fully Exposed	Foraging	Leaves	07/10/2021	Afternoon	Wet
13:58:02	150.97	1031.62	M	Adult	Dark Male	26.9	27.3	27.8	Open	N/A	Cloudy	Directly Away From the Sun	Fully Exposed	Foraging	Leaves	07/10/2021	Afternoon	Wet
13:58:46	76.23	1031.62	M	Adult	Dark Male	26.9	27.3	27.8	Open	N/A	Cloudy	Partially Away From the Sun	Partially Exposed	Foraging	Leaves	07/10/2021	Afternoon	Wet
14:04:49	153.88	1031.62	M	Adult	Dark Male	26.9	27.3	27.8	Open	N/A	Cloudy	Partially Away From the Sun	Fully Exposed	Foraging	Leaves	07/10/2021	Afternoon	Wet
14:07:32	66.07	1031.62	M	Adult	Dark Male	26.9	27.3	27.8	Road	N/A	Cloudy	Partially Away From the Sun	Fully Exposed	Foraging	Leaves	07/10/2021	Afternoon	Wet
14:31:12	277.27	1031.62	M	Adult	Dark Male	26.9	27.3	27.8	Closed	N/A	Cloudy	Partially Away From the Sun	Partially Exposed	Foraging	Leaves	07/10/2021	Afternoon	Wet
14:31:49	307.85	1031.62	M	Adult	Dark Male	26.9	27.3	27.8	Closed	N/A	Cloudy	Toward the Sun	Partially Exposed	Foraging	Leaves	07/10/2021	Afternoon	Wet
14:32:27	64.78	1031.62	M	Adult	Dark Male	26.9	27.3	27.8	Closed	N/A	Cloudy	Directly Away From the Sun	Partially Exposed	Foraging	Leaves	07/10/2021	Afternoon	Wet
14:38:22	65.2	1031.62	M	Adult	Dark Male	26.9	27.3	27.8	Open	N/A	Cloudy	Directly Away From the Sun	Partially Exposed	Foraging	Leaves	07/10/2021	Afternoon	Wet
14:39:42	54.2	1031.62	M	Adult	Dark Male	26.9	27.3	27.8	Open	N/A	Cloudy	Partially Away From the Sun	Fully Exposed	Foraging	Leaves	07/10/2021	Afternoon	Wet
10:49:49	194.64	1031.62	F	Adult	Kagiso	25.8	27.8	30.2	Open	N/A	Cloudy	Partially Away From the Sun	Partially Exposed	Foraging	Leaves	08/10/2021	Morning	Wet
12:22:46	79.42	1031.62	M	Adult	Polp	25.8	27.8	30.2	Closed	N/A	Cloudy	Partially Away From the Sun	Fully Exposed	Foraging	Branches	08/10/2021	Afternoon	Wet
12:23:25	205.55	1031.62	M	Adult	Polp	25.8	27.8	30.2	Closed	N/A	Cloudy	Toward the Sun	Partially Exposed	Foraging	Branches	08/10/2021	Afternoon	Wet
12:30:22	36.08	1031.62	M	Adult	Polp	25.8	27.8	30.2	Closed	N/A	Cloudy	Toward the Sun	Fully Exposed	Foraging	Branches	08/10/2021	Afternoon	Wet
12:31:24	286.7	1031.62	M	Adult	Polp	25.8	27.8	30.2	Closed	N/A	Cloudy	Directly Away From the Sun	Fully Exposed	Foraging	Branches	08/10/2021	Afternoon	Wet
12:33:22	76.39	1031.62	M	Adult	Polp	25.8	27.8	30.2	Closed	N/A	Cloudy	Partially Away From the Sun	Fully Exposed	Foraging	Branches	08/10/2021	Afternoon	Wet
12:33:54	9.42	1031.62	M	Adult	Polp	25.8	27.8	30.2	Closed	N/A	Cloudy	Partially Away From the Sun	Partially Exposed	Foraging	Branches	08/10/2021	Afternoon	Wet
12:34:55	121.6	1031.62	M	Adult	Polp	25.8	27.8	30.2	Closed	N/A	Cloudy	Partially Away From the Sun	Partially Exposed	Foraging	Branches	08/10/2021	Afternoon	Wet
12:35:59	62.76	1031.62	M	Adult	Polp	25.8	27.8	30.2	Closed	N/A	Cloudy	Directly Away From the Sun	Partially Exposed	Foraging	Branches	08/10/2021	Afternoon	Wet
12:36:50	88.56	1031.62	M	Adult	Polp	25.8	27.8	30.2	Closed	N/A	Cloudy	Partially Away From the Sun	Partially Exposed	Foraging	Branches	08/10/2021	Afternoon	Wet
12:37:26	60.68	1031.62	M	Adult	Polp	25.8	27.8	30.2	Closed	N/A	Cloudy	Directly Away From the Sun	Partially Exposed	Foraging	Branches	08/10/2021	Afternoon	Wet
12:39:36	132.48	1031.62	M	Adult	Polp	25.8	27.8	30.2	Closed	N/A	Cloudy	Partially Away From the Sun	Fully Exposed	Foraging	Branches	08/10/2021	Afternoon	Wet
16:33:16	9.04	1031.62	F	Adult	Flower	29.7	28.1	30.2	Closed	N/A	Sunny	Toward the Sun	Fully Exposed	Foraging	Leaves	08/10/2021	Evening	Wet
16:34:09	19.48	1031.62	F	Adult	Madame Butterfly	29.7	28.1	30.2	Closed	N/A	Sunny	Partially Away From the Sun	Fully Exposed	Foraging	Leaves	08/10/2021	Evening	Wet
16:47:15	52.2	1031.62	F	Adult	Madame Butterfly	29.7	28.1	30.2	Closed	N/A	Sunny	Partially Away From the Sun	Partially Exposed	Foraging	Leaves	08/10/2021	Evening	Wet
16:47:53	101.96	1031.62	F	Adult	Madame Butterfly	29.7	28.1	30.2	Closed	N/A	Sunny	Toward the Sun	No Exposure	Foraging	Leaves	08/10/2021	Evening	Wet
16:48:39	93.94	1031.62	F	Adult	Madame Butterfly	29.7	28.1	30.2	Closed	N/A	Sunny	Partially Away From the Sun	Fully Exposed	Foraging	Leaves	08/10/2021	Evening	Wet
16:49:36	14.98	1031.62	F	Adult	Madame Butterfly	29.7	28.1	30.2	Closed	N/A	Sunny	Partially Away From the Sun	Fully Exposed	Foraging	Leaves	08/10/2021	Evening	Wet
16:50:19	103.81	1031.62	F	Adult	Madame Butterfly	29.7	28.1	30.2	Closed	N/A	Sunny	Partially Away From the Sun	Fully Exposed	Foraging	Leaves	08/10/2021	Evening	Wet
16:51:00	121.53	1031.62	F	Adult	Madame Butterfly	29.7	28.1	30.2	Closed	N/A	Sunny	Toward the Sun	Partially Exposed	Foraging	Leaves	08/10/2021	Evening	Wet
16:51:42	55.93	1031.62	F	Adult	Flower	29.7	28.1	30.2	Closed	N/A	Sunny	Partially Away From the Sun	No Exposure	Foraging	Bark	08/10/2021	Evening	Wet
16:52:28	73.82	1031.62	F	Adult	Flower	29.7	28.1	30.2	Closed	N/A	Sunny	Partially Away From the Sun	No Exposure	Foraging	Leaves	08/10/2021	Evening	Wet
17:20:12	159.3	1031.62	F	Adult	Flower	29.7	28.1	30.2	Closed	N/A	Sunny	Partially Away From the Sun	No Exposure	Foraging	Leaves	08/10/2021	Evening	Wet
17:21:00	186.07	1031.62	F	Adult	Flower	29.7	28.1	30.2	Closed	N/A	Sunny	Directly Away From the Sun	No Exposure	Foraging	Bark	08/10/2021	Evening	Wet
17:21:55	35.14	1031.62	F	Adult	Flower	29.7	28.1	30.2	Closed	N/A	Sunny	Directly Away From the Sun	No Exposure	Foraging	Bark	08/10/2021	Evening	Wet
17:22:43	281.93	1031.62	F	Adult	Flower	29.7	28.1	30.2	Closed	N/A	Sunny	Partially Away From the Sun	Partially Exposed	Foraging	Leaves	08/10/2021	Evening	Wet
17:26:21	215.47	1031.62	F	Adult	Flower	29.7	28.1	30.2	Closed	N/A	Sunny	Toward the Sun	Partially Exposed	Foraging	Bark	08/10/2021	Evening	Wet
17:43:09	50.18	1031.62	M	Juvenile	Felix	29.7	28.1	30.2	Closed	N/A	Sunny	Partially Away From the Sun	Fully Exposed	Foraging	Leaves	08/10/2021	Evening	Wet
17:44:57	183.46	1031.62	M	Juvenile	Felix	29.7	28.1	30.2	Closed	N/A	Sunny	Partially Away From the Sun	Fully Exposed	Foraging	Leaves	08/10/2021	Evening	Wet
17:46:00	134	1031.62	M	Juvenile	Felix	29.7	28.1	30.2	Closed	N/A	Sunny	Partially Away From the Sun	No Exposure	Foraging	Leaves	08/10/2021	Evening	Wet
17:47:05	15.53	1031.62	M	Juvenile	Felix	29.7	28.1	30.2	Closed	N/A	Sunny	Partially Away From the Sun	Partially Exposed	Foraging	Leaves	08/10/2021	Evening	Wet
17:48:15	209.77	1031.62	M	Juvenile	Felix	29.7	28.1	30.2	Closed	N/A	Sunny	Partially Away From the Sun	Partially Exposed	Foraging	Leaves	08/10/2021	Evening	Wet
17:49:37	43.29	1031.62	M	Juvenile	Felix	29.7	28.1	30.2	Closed	N/A	Sunny	Directly Away From the Sun	Partially Exposed	Foraging	Leaves	08/10/2021	Evening	Wet
17:50:15	235.4	1031.62	M	Juvenile	Felix	29.7	28.1	30.2	Closed	N/A	Sunny	Partially Away From the Sun	No Exposure	Foraging	Leaves	08/10/2021	Evening	Wet
17:51:07	18	1031.62	M	Juvenile	Felix	29.7	28.1	30.2	Closed	N/A	Sunny	Partially Away From the Sun	No Exposure	Foraging	Leaves	08/10/2021	Evening	Wet
17:51:43	55.79	1031.62	M	Juvenile	Felix	29.7	28.1	30.2	Closed	N/A	Sunny	Partially Away From the Sun	No Exposure	Foraging	Leaves	08/10/2021	Evening	Wet
17:52:28	252.53	1031.62	M	Juvenile	Felix	29.7	28.1	30.2	Closed	N/A	Sunny	Toward the Sun	Partially Exposed	Foraging	Leaves	08/10/2021	Evening	Wet
17:53:54	323.38	1031.62	M	Juvenile	Felix	29.7	28.1	30.2	Closed	N/A	Sunny	Partially Away From the Sun	No Exposure	Foraging	Leaves	08/10/2021	Evening	Wet
14:51:56	49.71	1031.62	F	Sub-Adult	Walter	35	33.9	35.5	Closed	N/A	Cloudy	Directly Away From the Sun	Fully Exposed	Foraging	Leaves	09/10/2021	Afternoon	Wet
14:52:35	54.61	1031.62	F	Sub-Adult	Walter	35	33.9	35.5	Closed	N/A	Cloudy	Partially Away From the Sun	Fully Exposed	Foraging	Leaves	09/10/2021	Afternoon	Wet
16:00:45	17.63	1031.62	M	Adult	Dark Male	35	33.9	35.5	Open	N/A	Cloudy	Partially Away From the Sun	No Exposure	Foraging	Leaves	09/10/2021	Evening	Wet
16:01:32	69.99	1031.62	M	Adult	Dark Male	35	33.9	35.5	Open	N/A	Cloudy	Partially Away From the Sun	Partially Exposed	Foraging	Leaves	09/10/2021	Evening	Wet
16:02:57	491.23	1031.62	M	Adult	Dark Male	35	33.9	35.5	Open	N/A	Cloudy	Partially Away From the Sun	No Exposure	Foraging	Leaves	09/10/2021	Evening	Wet
16:03:41	31.7	1031.62	M	Adult	Dark Male	35	33.9	35.5	Open	N/A	Cloudy	Toward the Sun	No Exposure	Foraging	Leaves	09/10/2021	Evening	Wet
16:05:30	175.38	1031.62	M	Adult	Dark Male	35	33.9	35.5	Open	N/A	Cloudy	Partially Away From the Sun	Partially Exposed	Foraging	Leaves	09/10/2021	Evening	Wet
16:06:10	45.94	1031.62	M	Adult	Dark Male	35	33.9	35.5	Open	N/A	Cloudy	Toward the Sun	Partially Exposed	Foraging	Leaves	09/10/2021	Evening	Wet
16:06:47	48.52	1031.62	M	Adult	Dark Male	35	33.9	35.5	Open	N/A	Cloudy	Partially Away From the Sun	No Exposure	Foraging	Leaves	09/10/2021	Evening	Wet
16:07:19	197.64	1031.62	M	Adult	Dark Male	35	33.9	35.5	Open	N/A	Cloudy	Toward the Sun	Partially Exposed	Foraging	Leaves	09/10/2021	Evening	Wet
16:07:52	44.58	1031.62	M	Adult	Dark Male	35	33.9	35.5	Open	N/A	Cloudy	Partially Away From the Sun	Partially Exposed	Foraging	Leaves	09/10/2021	Evening	Wet
16:08:26	529.12	1031.62	M	Adult	Dark Male	35	33.9	35.5	Open	N/A	Cloudy	Toward the Sun	Partially Exposed	Foraging	Leaves	09/10/2021	Evening	Wet
16:09:04	278.76	1031.62	M	Adult	Dark Male	35	33.9	35.5	Open	N/A	Cloudy	Toward the Sun	No Exposure	Foraging	Leaves	09/10/2021	Evening	Wet
16:10:46	148.78	1031.62	M	Adult	Dark Male	35	33.9	35.5	Open	N/A	Cloudy	Partially Away From the Sun	No Exposure	Foraging	Leaves	09/10/2021	Evening	Wet
16:11:16	119.08	1031.62	M	Adult	Dark Male	35	33.9	35.5	Open	N/A	Cloudy	Toward the Sun	No Exposure	Foraging	Leaves	09/10/2021	Evening	Wet
16:25:35	68.08	1031.62	M	Juvenile	Napoleon	35	33.9	35.5	Open	N/A	Cloudy	Partially Away From the Sun	Fully Exposed	Foraging	Leaves	09/10/2021	Evening	Wet
16:26:11	66.88	1031.62	M	Juvenile	Napoleon	35	33.9	35.5	Open	N/A	Cloudy	Partially Away From the Sun	No Exposure	Foraging	Leaves	09/10/2021	Evening	Wet
16:49:58	135.08	1031.62	F	Adult	Kagiso	35	33.9	35.5	Closed	N/A	Cloudy	Partially Away From the Sun	Partially Exposed	Foraging	Leaves	09/10/2021	Evening	Wet
16:51:11	587.61	1031.62	F	Adult	Kagiso	35	33.9	35.5	Closed	N/A	Cloudy	Toward the Sun	Partially Exposed	Foraging	Leaves	09/10/2021	Evening	Wet
16:55:31	43.04	1031.62	F	Adult	Kagiso	35	33.9	35.5	Closed	N/A	Cloudy	Directly Away From the Sun	Partially Exposed	Foraging	Leaves	09/10/2021	Evening	Wet
16:56:06	76.06	1031.62	F	Adult	Kagiso	35	33.9	35.5	Closed	N/A	Cloudy	Partially Away From the Sun	Partially Exposed	Foraging	Leaves	09/10/2021	Evening	Wet
16:56:45	73.22	1031.62	F	Adult	Kagiso	35	33.9	35.5	Closed	N/A	Cloudy	Toward the Sun	Partially Exposed	Foraging	Leaves	09/10/2021	Evening	Wet
16:57:18	30.09	1031.62	F	Adult	Kagiso	35	33.9	35.5	Closed	N/A	Cloudy	Partially Away From the Sun	Partially Exposed	Foraging	Leaves	09/10/2021	Evening	Wet
16:57:48	88.83	1031.62	F	Adult	Kagiso	35	33.9	35.5	Closed	N/A	Cloudy	Toward the Sun	Partially Exposed	Foraging	Leaves	09/10/2021	Evening	Wet
16:58:21	34.58	1031.62	F	Adult	Kagiso	35	33.9	35.5	Closed	N/A	Cloudy	Partially Away From the Sun	Partially Exposed	Foraging	Leaves	09/10/2021	Evening	Wet
10:37:48	220.67	1031.62	F	Adult	Kagiso	22.2	26.2	27.5	Open	N/A	Cloudy	Partially Away From the Sun	Fully Exposed	Foraging	Leaves	11/10/2021	Morning	Wet
10:38:29	199.8	1031.62	F	Adult	Kagiso	22.2	26.2	27.5	Open	N/A	Cloudy	Directly Away From the Sun	Fully Exposed	Foraging	Leaves	11/10/2021	Morning	Wet
10:41:01	114.11	1031.62	F	Adult	Kagiso	22.2	26.2	27.5	Open	N/A	Cloudy	Partially Away From the Sun	Fully Exposed	Foraging	Leaves	11/10/2021	Morning	Wet
10:42:17	39.33	1031.62	F	Adult	Kagiso	22.2	26.2	27.5	Open	N/A	Cloudy	Partially Away From the Sun	Fully Exposed	Foraging	Leaves	11/10/2021	Morning	Wet
10:45:38	30.44	1031.62	F	Adult	Kagiso	22.2	26.2	27.5	Open	N/A	Cloudy	Toward the Sun	Fully Exposed	Foraging	Leaves	11/10/2021	Morning	Wet
10:47:30	29.38	1031.62	F	Adult	Kagiso	22.2	26.2	27.5	Open	N/A	Cloudy	Partially Away From the Sun	Fully Exposed	Foraging	Leaves	11/10/2021	Morning	Wet
10:49:59	67.54	1031.62	F	Adult	Kagiso	22.2	26.2	27.5	Open	N/A	Cloudy	Partially Away From the Sun	Fully Exposed	Foraging	Leaves	11/10/2021	Morning	Wet
10:51:52	56.21	1031.62	F	Adult	Kagiso	22.2	26.2	27.5	Open	N/A	Cloudy	Partially Away From the Sun	Fully Exposed	Foraging	Leaves	11/10/2021	Morning	Wet
10:52:57	356.8	1031.62	F	Adult	Kagiso	22.2	26.2	27.5	Open	N/A	Cloudy	Partially Away From the Sun	Fully Exposed	Foraging	Leaves	11/10/2021	Morning	Wet
10:55:41	61.25	1031.62	F	Adult	Kagiso	22.2	26.2	27.5	Open	N/A	Cloudy	Directly Away From the Sun	Fully Exposed	Foraging	Leaves	11/10/2021	Morning	Wet
10:56:48	377.52	1031.62	F	Adult	Kagiso	22.2	26.2	27.5	Open	N/A	Cloudy	Partially Away From the Sun	Fully Exposed	Foraging	Leaves	11/10/2021	Morning	Wet
10:58:17	220.58	1031.62	F	Adult	Kagiso	22.2	26.2	27.5	Open	N/A	Cloudy	Directly Away From the Sun	Fully Exposed	Foraging	Leaves	11/10/2021	Morning	Wet
11:00:38	259.36	1031.62	F	Adult	Kagiso	22.2	26.2	27.5	Open	N/A	Cloudy	Partially Away From the Sun	Fully Exposed	Foraging	Leaves	11/10/2021	Morning	Wet
11:01:29	72.27	1031.62	F	Adult	Kagiso	22.2	26.2	27.5	Open	N/A	Cloudy	Toward the Sun	Fully Exposed	Foraging	Leaves	11/10/2021	Morning	Wet
11:16:37	46.2	1031.62	M	Adult	Dark Male	22.2	26.2	27.5	Open	N/A	Cloudy	Toward the Sun	Partially Exposed	Foraging	Leaves	11/10/2021	Afternoon	Wet
11:22:15	288.37	1031.62	M	Adult	Dark Male	22.2	26.2	27.5	Open	N/A	Cloudy	Partially Away From the Sun	Partially Exposed	Foraging	Leaves	11/10/2021	Afternoon	Wet
11:22:49	87.07	1031.62	M	Adult	Dark Male	22.2	26.2	27.5	Open	N/A	Cloudy	Partially Away From the Sun	Fully Exposed	Foraging	Leaves	11/10/2021	Afternoon	Wet
11:33:44	599.69	1031.62	M	Adult	Dark Male	22.2	26.2	27.5	Open	N/A	Cloudy	Partially Away From the Sun	Fully Exposed	Foraging	Leaves	11/10/2021	Afternoon	Wet
11:39:17	159.14	1031.62	M	Adult	Dark Male	22.2	26.2	27.5	Open	N/A	Cloudy	Toward the Sun	Fully Exposed	Foraging	Leaves	11/10/2021	Afternoon	Wet
11:40:26	28.72	1031.62	M	Adult	Dark Male	22.2	26.2	27.5	Open	N/A	Cloudy	Partially Away From the Sun	Fully Exposed	Foraging	Leaves	11/10/2021	Afternoon	Wet
11:48:53	287.85	1031.62	M	Adult	Dark Male	22.2	26.2	27.5	Open	N/A	Cloudy	Toward the Sun	Fully Exposed	Foraging	Leaves	11/10/2021	Afternoon	Wet
11:49:34	201.88	1031.62	M	Adult	Dark Male	22.2	26.2	27.5	Open	N/A	Cloudy	Partially Away From the Sun	Fully Exposed	Foraging	Leaves	11/10/2021	Afternoon	Wet
11:50:47	144.41	1031.62	M	Adult	Dark Male	22.2	26.2	27.5	Open	N/A	Cloudy	Partially Away From the Sun	No Exposure	Foraging	Leaves	11/10/2021	Afternoon	Wet
11:52:01	79.76	1031.62	M	Adult	Dark Male	22.2	26.2	27.5	Open	N/A	Cloudy	Toward the Sun	No Exposure	Foraging	Leaves	11/10/2021	Afternoon	Wet
11:56:28	180.19	1031.62	M	Adult	Dark Male	22.2	26.2	27.5	Open	N/A	Cloudy	Partially Away From the Sun	Partially Exposed	Foraging	Leaves	11/10/2021	Afternoon	Wet
11:57:18	25.08	1031.62	M	Adult	Dark Male	22.2	26.2	27.5	Open	N/A	Cloudy	Partially Away From the Sun	Partially Exposed	Foraging	Leaves	11/10/2021	Afternoon	Wet
11:59:32	180.44	1031.62	M	Adult	Dark Male	22.2	26.2	27.5	Open	N/A	Cloudy	Partially Away From the Sun	Partially Exposed	Foraging	Leaves	11/10/2021	Afternoon	Wet
16:01:51	118.55	1031.62	M	Sub-Adult	Forest	27.3	24.4	27.5	Open	N/A	Sunny	Partially Away From the Sun	Fully Exposed	Foraging	Leaves	11/10/2021	Evening	Wet
16:10:01	705.14	1031.62	M	Sub-Adult	Forest	27.3	24.4	27.5	Open	N/A	Sunny	Partially Away From the Sun	Partially Exposed	Foraging	Leaves	11/10/2021	Evening	Wet
16:11:09	76.23	1031.62	M	Sub-Adult	Forest	27.3	24.4	27.5	Open	N/A	Sunny	Partially Away From the Sun	No Exposure	Foraging	Leaves	11/10/2021	Evening	Wet
16:12:39	34.83	1031.62	M	Sub-Adult	Forest	27.3	24.4	27.5	Open	N/A	Sunny	Partially Away From the Sun	No Exposure	Foraging	Leaves	11/10/2021	Evening	Wet
16:13:57	82.04	1031.62	M	Sub-Adult	Forest	27.3	24.4	27.5	Open	N/A	Sunny	Partially Away From the Sun	Partially Exposed	Foraging	Leaves	11/10/2021	Evening	Wet
16:14:50	138.49	1031.62	M	Sub-Adult	Forest	27.3	24.4	27.5	Open	N/A	Sunny	Toward the Sun	No Exposure	Foraging	Leaves	11/10/2021	Evening	Wet
17:31:45	133.64	1031.62	M	Adult	Sun	27.3	24.4	27.5	Open	N/A	Sunny	Toward the Sun	No Exposure	Foraging	Leaves	11/10/2021	Evening	Wet
17:42:10	33.8	1031.62	M	Adult	Sun	27.3	24.4	27.5	Open	N/A	Sunny	Partially Away From the Sun	No Exposure	Foraging	Leaves	11/10/2021	Evening	Wet
17:44:04	80.84	1031.62	M	Adult	Sun	27.3	24.4	27.5	Open	N/A	Sunny	Partially Away From the Sun	No Exposure	Foraging	Leaves	11/10/2021	Evening	Wet
17:56:25	439.07	1031.62	F	Adult	Madame Butterfly	27.3	24.4	27.5	Open	N/A	Sunny	Toward the Sun	No Exposure	Foraging	Leaves	11/10/2021	Evening	Wet
17:58:30	18.28	1031.62	F	Adult	Wolke	27.3	24.4	27.5	Open	N/A	Sunny	Partially Away From the Sun	No Exposure	Foraging	Leaves	11/10/2021	Evening	Wet
17:59:19	74.42	1031.62	F	Adult	Wolke	27.3	24.4	27.5	Open	N/A	Sunny	Partially Away From the Sun	No Exposure	Foraging	Leaves	11/10/2021	Evening	Wet
07:48:14	53.01	1031.62	M	Adult	Sun	18.2	23.9	30.9	Open	N/A	Sunny	Partially Away From the Sun	Partially Exposed	Foraging	Leaves	12/10/2021	Morning	Wet
07:48:44	331.61	1031.62	M	Adult	Sun	18.2	23.9	30.9	Open	N/A	Sunny	Partially Away From the Sun	Partially Exposed	Foraging	Leaves	12/10/2021	Morning	Wet
07:49:22	135.72	1031.62	M	Adult	Sun	18.2	23.9	30.9	Open	N/A	Sunny	Directly Away From the Sun	Partially Exposed	Foraging	Leaves	12/10/2021	Morning	Wet
07:51:58	32.55	1031.62	M	Adult	Sun	18.2	23.9	30.9	Open	N/A	Sunny	Partially Away From the Sun	No Exposure	Foraging	Leaves	12/10/2021	Morning	Wet
07:52:39	190.09	1031.62	M	Adult	Sun	18.2	23.9	30.9	Open	N/A	Sunny	Partially Away From the Sun	Partially Exposed	Foraging	Leaves	12/10/2021	Morning	Wet
07:55:54	278.65	1031.62	M	Adult	Sun	18.2	23.9	30.9	Open	N/A	Sunny	Partially Away From the Sun	Fully Exposed	Foraging	Leaves	12/10/2021	Morning	Wet
07:56:27	19.61	1031.62	M	Adult	Sun	18.2	23.9	30.9	Open	N/A	Sunny	Partially Away From the Sun	Fully Exposed	Foraging	Leaves	12/10/2021	Morning	Wet
09:37:50	63.53	1031.62	F	Sub-Adult	Shadow	18.2	23.9	30.9	Closed	N/A	Sunny	Directly Away From the Sun	Partially Exposed	Foraging	Leaves	12/10/2021	Morning	Wet
09:38:26	66.27	1031.62	F	Sub-Adult	Shadow	18.2	23.9	30.9	Closed	N/A	Sunny	Partially Away From the Sun	Partially Exposed	Foraging	Leaves	12/10/2021	Morning	Wet
09:38:58	48.21	1031.62	F	Sub-Adult	Shadow	18.2	23.9	30.9	Closed	N/A	Sunny	Directly Away From the Sun	Partially Exposed	Foraging	Leaves	12/10/2021	Morning	Wet
09:50:32	162.47	1031.62	F	Sub-Adult	Shadow	18.2	23.9	30.9	Closed	N/A	Sunny	Partially Away From the Sun	Fully Exposed	Foraging	Leaves	12/10/2021	Morning	Wet
09:51:20	111.09	1031.62	F	Sub-Adult	Shadow	18.2	23.9	30.9	Closed	N/A	Sunny	Directly Away From the Sun	Fully Exposed	Foraging	Leaves	12/10/2021	Morning	Wet
13:40:25	116.25	1031.62	F	Sub-Adult	Shadow	28.8	30.8	30.9	Open	N/A	Sunny	Partially Away From the Sun	Fully Exposed	Foraging	Leaves	12/10/2021	Afternoon	Wet
13:52:13	128.63	1031.62	F	Adult	Kagiso	28.8	30.8	30.9	Open	N/A	Sunny	Partially Away From the Sun	Fully Exposed	Foraging	Leaves	12/10/2021	Afternoon	Wet
14:03:36	305.95	1031.62	F	Adult	Kagiso	28.8	30.8	30.9	Open	N/A	Sunny	Partially Away From the Sun	Fully Exposed	Foraging	Leaves	12/10/2021	Afternoon	Wet
14:05:23	86.62	1031.62	F	Adult	Kagiso	28.8	30.8	30.9	Open	N/A	Sunny	Toward the Sun	Fully Exposed	Foraging	Leaves	12/10/2021	Afternoon	Wet
14:05:57	124.89	1031.62	F	Sub-Adult	Walter	28.8	30.8	30.9	Open	N/A	Sunny	Partially Away From the Sun	Fully Exposed	Foraging	Leaves	12/10/2021	Afternoon	Wet
14:13:10	164.63	1031.62	F	Sub-Adult	Walter	28.8	30.8	30.9	Road	N/A	Sunny	Partially Away From the Sun	Fully Exposed	Foraging	Leaves	12/10/2021	Afternoon	Wet
14:27:12	164.63	1031.62	F	Sub-Adult	Walter	28.8	30.8	30.9	Road	N/A	Sunny	Partially Away From the Sun	Fully Exposed	Foraging	Leaves	12/10/2021	Afternoon	Wet
14:27:39	52.56	1031.62	M	Adult	Lovely	28.8	30.8	30.9	Open	N/A	Sunny	Partially Away From the Sun	Partially Exposed	Foraging	Leaves	12/10/2021	Afternoon	Wet
14:45:16	60.98	1031.62	M	Adult	Lovely	28.8	30.8	30.9	Open	N/A	Sunny	Toward the Sun	Partially Exposed	Foraging	Leaves	12/10/2021	Afternoon	Wet
14:51:03	703.24	1031.62	M	Adult	Lovely	28.8	30.8	30.9	Open	N/A	Sunny	Toward the Sun	No Exposure	Foraging	Leaves	12/10/2021	Afternoon	Wet
14:51:38	92.12	1031.62	M	Adult	Lovely	28.8	30.8	30.9	Open	N/A	Sunny	Partially Away From the Sun	Partially Exposed	Foraging	Leaves	12/10/2021	Afternoon	Wet
14:52:14	233.85	1031.62	M	Adult	Lovely	28.8	30.8	30.9	Open	N/A	Sunny	Partially Away From the Sun	No Exposure	Foraging	Leaves	12/10/2021	Afternoon	Wet
12:06:07	16.64	1031.62	M	Adult	Sun	27.5	32.8	34.5	Closed	N/A	Sunny	Partially Away From the Sun	No Exposure	Foraging	Branches	13/10/2021	Afternoon	Wet
12:06:46	72.71	1031.62	M	Adult	Sun	27.5	32.8	34.5	Closed	N/A	Sunny	Toward the Sun	Partially Exposed	Foraging	Branches	13/10/2021	Afternoon	Wet
12:07:17	194.85	1031.62	M	Adult	Sun	27.5	32.8	34.5	Closed	N/A	Sunny	Partially Away From the Sun	Partially Exposed	Foraging	Branches	13/10/2021	Afternoon	Wet
12:08:36	46.9	1031.62	M	Adult	Sun	27.5	32.8	34.5	Closed	N/A	Sunny	Toward the Sun	Partially Exposed	Foraging	Branches	13/10/2021	Afternoon	Wet
12:09:25	47.78	1031.62	M	Adult	Sun	27.5	32.8	34.5	Closed	N/A	Sunny	Partially Away From the Sun	Fully Exposed	Foraging	Branches	13/10/2021	Afternoon	Wet
12:10:54	152.71	1031.62	M	Adult	Sun	27.5	32.8	34.5	Closed	N/A	Sunny	Partially Away From the Sun	Fully Exposed	Foraging	Leaves	13/10/2021	Afternoon	Wet
12:12:08	156.87	1031.62	M	Adult	Sun	27.5	32.8	34.5	Closed	N/A	Sunny	Directly Away From the Sun	Fully Exposed	Foraging	Leaves	13/10/2021	Afternoon	Wet
12:13:01	51.54	1031.62	M	Adult	Sun	27.5	32.8	34.5	Closed	N/A	Sunny	Toward the Sun	Fully Exposed	Foraging	Leaves	13/10/2021	Afternoon	Wet
15:35:49	75.92	1031.62	F	Adult	Kagiso	34.2	32.2	34.5	Open	N/A	Sunny	Directly Away From the Sun	Fully Exposed	Foraging	Leaves	13/10/2021	Evening	Wet
15:38:33	48.88	1031.62	F	Adult	Kagiso	34.2	32.2	34.5	Open	N/A	Sunny	Partially Away From the Sun	Partially Exposed	Foraging	Leaves	13/10/2021	Evening	Wet
15:39:43	60.25	1031.62	F	Adult	Kagiso	34.2	32.2	34.5	Open	N/A	Sunny	Toward the Sun	Partially Exposed	Foraging	Leaves	13/10/2021	Evening	Wet
15:41:20	20.93	1031.62	F	Adult	Kagiso	34.2	32.2	34.5	Open	N/A	Sunny	Partially Away From the Sun	Partially Exposed	Foraging	Leaves	13/10/2021	Evening	Wet
15:43:03	253.05	1031.62	F	Adult	Kagiso	34.2	32.2	34.5	Open	N/A	Sunny	Partially Away From the Sun	No Exposure	Foraging	Leaves	13/10/2021	Evening	Wet
15:44:07	119.36	1031.62	F	Adult	Kagiso	34.2	32.2	34.5	Open	N/A	Sunny	Toward the Sun	No Exposure	Foraging	Leaves	13/10/2021	Evening	Wet
15:45:32	143.56	1031.62	F	Adult	Kagiso	34.2	32.2	34.5	Open	N/A	Sunny	Toward the Sun	No Exposure	Foraging	Leaves	13/10/2021	Evening	Wet
15:46:28	129.98	1031.62	F	Adult	Kagiso	34.2	32.2	34.5	Open	N/A	Sunny	Partially Away From the Sun	Fully Exposed	Foraging	Leaves	13/10/2021	Evening	Wet
15:47:02	19.58	1031.62	F	Adult	Kagiso	34.2	32.2	34.5	Open	N/A	Sunny	Toward the Sun	Fully Exposed	Foraging	Leaves	13/10/2021	Evening	Wet
15:47:57	45.66	1031.62	F	Adult	Kagiso	34.2	32.2	34.5	Open	N/A	Sunny	Directly Away From the Sun	Fully Exposed	Foraging	Leaves	13/10/2021	Evening	Wet
15:48:31	84.2	1031.62	F	Adult	Kagiso	34.2	32.2	34.5	Open	N/A	Sunny	Directly Away From the Sun	Partially Exposed	Foraging	Leaves	13/10/2021	Evening	Wet
15:49:11	62.69	1031.62	F	Adult	Kagiso	34.2	32.2	34.5	Open	N/A	Sunny	Partially Away From the Sun	Fully Exposed	Foraging	Leaves	13/10/2021	Evening	Wet
15:50:09	110.3	1031.62	F	Adult	Kagiso	34.2	32.2	34.5	Open	N/A	Sunny	Partially Away From the Sun	Fully Exposed	Foraging	Leaves	13/10/2021	Evening	Wet
15:50:46	110.3	1031.62	F	Adult	Kagiso	34.2	32.2	34.5	Open	N/A	Sunny	Directly Away From the Sun	Fully Exposed	Foraging	Leaves	13/10/2021	Evening	Wet
15:52:11	53.95	1031.62	F	Adult	Kagiso	34.2	32.2	34.5	Open	N/A	Sunny	Partially Away From the Sun	Fully Exposed	Foraging	Leaves	13/10/2021	Evening	Wet
15:52:56	55.76	1031.62	F	Adult	Kagiso	34.2	32.2	34.5	Open	N/A	Sunny	Toward the Sun	No Exposure	Foraging	Leaves	13/10/2021	Evening	Wet
16:50:33	129.15	1031.62	F	Adult	Wolke	34.2	32.2	34.5	Open	N/A	Sunny	Toward the Sun	Fully Exposed	Foraging	Brancheses	13/10/2021	Evening	Wet
16:51:05	86.64	1031.62	F	Adult	Madame Butterfly	34.2	32.2	34.5	Open	N/A	Sunny	Directly Away From the Sun	Partially Exposed	Foraging	Leaves	13/10/2021	Evening	Wet
16:51:43	85.8	1031.62	F	Adult	Madame Butterfly	34.2	32.2	34.5	Open	N/A	Sunny	Directly Away From the Sun	No Exposure	Foraging	Leaves	13/10/2021	Evening	Wet
17:06:00	118.73	1031.62	M	Adult	Lovely	34.2	32.2	34.5	Open	N/A	Sunny	Partially Away From the Sun	Fully Exposed	Foraging	Leaves	13/10/2021	Evening	Wet
17:14:55	505.37	1031.62	F	Adult	Emily	34.2	32.2	34.5	Open	N/A	Sunny	Partially Away From the Sun	Fully Exposed	Foraging	Leaves	13/10/2021	Evening	Wet
17:15:50	139.34	1031.62	M	Adult	Lovely	34.2	32.2	34.5	Open	N/A	Sunny	Partially Away From the Sun	Partially Exposed	Foraging	Leaves	13/10/2021	Evening	Wet
17:16:21	59.35	1031.62	M	Adult	Lovely	34.2	32.2	34.5	Open	N/A	Sunny	Directly Away From the Sun	Partially Exposed	Foraging	Leaves	13/10/2021	Evening	Wet
17:16:50	236.27	1031.62	M	Adult	Lovely	34.2	32.2	34.5	Open	N/A	Sunny	Partially Away From the Sun	Partially Exposed	Foraging	Leaves	13/10/2021	Evening	Wet
17:17:39	301.38	1031.62	M	Adult	Lovely	34.2	32.2	34.5	Open	N/A	Sunny	Toward the Sun	No Exposure	Foraging	Leaves	13/10/2021	Evening	Wet
17:18:24	64.95	1031.62	M	Adult	Lovely	34.2	32.2	34.5	Open	N/A	Sunny	Toward the Sun	Fully Exposed	Foraging	Leaves	13/10/2021	Evening	Wet
17:18:54	71.83	1031.62	M	Adult	Lovely	34.2	32.2	34.5	Open	N/A	Sunny	Partially Away From the Sun	Fully Exposed	Foraging	Leaves	13/10/2021	Evening	Wet
13:32:53	33.68	1031.62	M	Adult	Sun	33.8	35.2	35.5	Closed	N/A	Sunny	Directly Away From the Sun	Fully Exposed	Foraging	Leaves	14/10/2021	Afternoon	Wet
13:44:38	26.03	1031.62	M	Adult	Sun	33.8	35.2	35.5	Closed	N/A	Sunny	Partially Away From the Sun	Fully Exposed	Foraging	Leaves	14/10/2021	Afternoon	Wet
13:45:36	60.07	1031.62	M	Adult	Sun	33.8	35.2	35.5	Closed	N/A	Sunny	Directly Away From the Sun	Partially Exposed	Foraging	Leaves	14/10/2021	Afternoon	Wet
13:46:23	22.42	1031.62	M	Adult	Sun	33.8	35.2	35.5	Closed	N/A	Sunny	Toward the Sun	Partially Exposed	Foraging	Leaves	14/10/2021	Afternoon	Wet
13:52:24	97.43	1031.62	M	Adult	Sun	33.8	35.2	35.5	Closed	N/A	Sunny	Partially Away From the Sun	Fully Exposed	Foraging	Leaves	14/10/2021	Afternoon	Wet
14:03:03	535.98	1031.62	M	Adult	Sun	33.8	35.2	35.5	Closed	N/A	Sunny	Partially Away From the Sun	Fully Exposed	Foraging	Leaves	14/10/2021	Afternoon	Wet
14:04:09	150.92	1031.62	M	Adult	Sun	33.8	35.2	35.5	Closed	N/A	Sunny	Directly Away From the Sun	Fully Exposed	Foraging	Leaves	14/10/2021	Afternoon	Wet
14:07:13	173.26	1031.62	M	Adult	Sun	33.8	35.2	35.5	Closed	N/A	Sunny	Partially Away From the Sun	Fully Exposed	Foraging	Leaves	14/10/2021	Afternoon	Wet
14:08:33	83.39	1031.62	M	Adult	Sun	33.8	35.2	35.5	Closed	N/A	Sunny	Toward the Sun	Fully Exposed	Foraging	Leaves	14/10/2021	Afternoon	Wet
15:14:06	226.18	1031.62	M	Sub-Adult	Forest	33.8	35.2	35.5	Open	N/A	Sunny	Toward the Sun	Fully Exposed	Foraging	Leaves	14/10/2021	Evening	Wet
15:14:39	32.33	1031.62	M	Sub-Adult	Forest	33.8	35.2	35.5	Open	N/A	Sunny	Partially Away From the Sun	Fully Exposed	Foraging	Leaves	14/10/2021	Evening	Wet
15:15:19	16.58	1031.62	M	Sub-Adult	Forest	33.8	35.2	35.5	Open	N/A	Sunny	Directly Away From the Sun	Fully Exposed	Foraging	Leaves	14/10/2021	Evening	Wet
15:15:54	24.79	1031.62	M	Sub-Adult	Forest	33.8	35.2	35.5	Open	N/A	Sunny	Toward the Sun	Partially Exposed	Foraging	Leaves	14/10/2021	Evening	Wet
11:04:32	148.76	1031.62	F	Adult	Pumba	29.2	33.4	37.1	Open	N/A	Sunny	Toward the Sun	Fully Exposed	Foraging	Leaves	15/10/2021	Afternoon	Wet
11:05:06	121.31	1031.62	F	Adult	Pumba	29.2	33.4	37.1	Open	N/A	Sunny	Toward the Sun	Fully Exposed	Foraging	Leaves	15/10/2021	Afternoon	Wet
11:05:41	118.29	1031.62	F	Adult	Pumba	29.2	33.4	37.1	Open	N/A	Sunny	Toward the Sun	Fully Exposed	Foraging	Leaves	15/10/2021	Afternoon	Wet
17:05:47	255.26	1031.62	M	Adult	Polp	36.4	34.2	37.1	Closed	N/A	Sunny	Directly Away From the Sun	Fully Exposed	Foraging	Leaves	15/10/2021	Evening	Wet
17:06:15	173.45	1031.62	M	Adult	Polp	36.4	34.2	37.1	Closed	N/A	Sunny	Partially Away From the Sun	Fully Exposed	Foraging	Leaves	15/10/2021	Evening	Wet
17:16:09	239.72	1031.62	M	Adult	Polp	36.4	34.2	37.1	Closed	N/A	Sunny	Toward the Sun	Partially Exposed	Foraging	Leaves	15/10/2021	Evening	Wet
17:17:27	97.6	1031.62	M	Adult	Polp	36.4	34.2	37.1	Closed	N/A	Sunny	Toward the Sun	Partially Exposed	Foraging	Leaves	15/10/2021	Evening	Wet
17:18:13	52.35	1031.62	M	Adult	Polp	36.4	34.2	37.1	Closed	N/A	Sunny	Partially Away From the Sun	Fully Exposed	Foraging	Leaves	15/10/2021	Evening	Wet
17:20:19	137.71	1031.62	M	Adult	Polp	36.4	34.2	37.1	Closed	N/A	Sunny	Partially Away From the Sun	Fully Exposed	Foraging	Leaves	15/10/2021	Evening	Wet
15:30:58	126.97	1031.62	M	Adult	Kevin	23	21.3	26.5	Open	N/A	Overcast	Cloudy Day	Cloudy Day	Foraging	Leaves	18/10/2021	Evening	Wet
15:35:51	304.49	1031.62	M	Adult	Kevin	23	21.3	26.5	Open	N/A	Overcast	Cloudy Day	Cloudy Day	Foraging	Leaves	18/10/2021	Evening	Wet
15:37:59	126.35	1031.62	M	Adult	Kevin	23	21.3	26.5	Open	N/A	Overcast	Cloudy Day	Cloudy Day	Foraging	Leaves	18/10/2021	Evening	Wet
15:47:13	145.17	1031.62	M	Adult	Kevin	23	21.3	26.5	Open	N/A	Overcast	Cloudy Day	Cloudy Day	Foraging	Leaves	18/10/2021	Evening	Wet
15:47:46	35.19	1031.62	M	Adult	Kevin	23	21.3	26.5	Open	N/A	Overcast	Cloudy Day	Cloudy Day	Foraging	Leaves	18/10/2021	Evening	Wet
15:48:31	15.67	1031.62	M	Adult	Kevin	23	21.3	26.5	Open	N/A	Overcast	Cloudy Day	Cloudy Day	Foraging	Leaves	18/10/2021	Evening	Wet
15:49:07	56.19	1031.62	M	Adult	Kevin	23	21.3	26.5	Open	N/A	Overcast	Cloudy Day	Cloudy Day	Foraging	Leaves	18/10/2021	Evening	Wet
15:49:58	16.51	1031.62	M	Adult	Kevin	23	21.3	26.5	Open	N/A	Overcast	Cloudy Day	Cloudy Day	Foraging	Leaves	18/10/2021	Evening	Wet
15:51:27	17.07	1031.62	M	Adult	Kevin	23	21.3	26.5	Open	N/A	Overcast	Cloudy Day	Cloudy Day	Foraging	Leaves	18/10/2021	Evening	Wet
15:57:45	671.49	1031.62	M	Adult	Kevin	23	21.3	26.5	Open	N/A	Overcast	Cloudy Day	Cloudy Day	Foraging	Leaves	18/10/2021	Evening	Wet
15:58:21	14.73	1031.62	M	Adult	Kevin	23	21.3	26.5	Open	N/A	Overcast	Cloudy Day	Cloudy Day	Foraging	Leaves	18/10/2021	Evening	Wet
16:01:06	115.08	1031.62	M	Adult	Kevin	23	21.3	26.5	Open	N/A	Overcast	Cloudy Day	Cloudy Day	Foraging	Leaves	18/10/2021	Evening	Wet
14:02:11	35.32	1031.62	F	Adult	Madame Butterfly	24.8	26.1	28.3	Closed	N/A	Cloudy	Partially Away From the Sun	Fully Exposed	Foraging	Leaves	20/10/2021	Afternoon	Wet
14:02:46	208.33	1031.62	F	Adult	Madame Butterfly	24.8	26.1	28.3	Closed	N/A	Cloudy	Toward the Sun	Fully Exposed	Foraging	Leaves	20/10/2021	Afternoon	Wet
14:18:54	85.91	1031.62	F	Adult	Madame Butterfly	24.8	26.1	28.3	Closed	N/A	Cloudy	Partially Away From the Sun	Fully Exposed	Foraging	Branches	20/10/2021	Afternoon	Wet
14:20:14	74.64	1031.62	F	Adult	Madame Butterfly	24.8	26.1	28.3	Closed	N/A	Cloudy	Toward the Sun	Fully Exposed	Foraging	Leaves	20/10/2021	Afternoon	Wet
14:20:56	60.89	1031.62	F	Adult	Madame Butterfly	24.8	26.1	28.3	Closed	N/A	Cloudy	Partially Away From the Sun	Fully Exposed	Foraging	Branches	20/10/2021	Afternoon	Wet
14:21:54	102.4	1031.62	F	Adult	Madame Butterfly	24.8	26.1	28.3	Closed	N/A	Cloudy	Partially Away From the Sun	Fully Exposed	Foraging	Branches	20/10/2021	Afternoon	Wet
13:29:43	132.04	1031.62	M	Adult	Kevin	29.1	29.1	30.4	Closed	N/A	Sunny	Partially Away From the Sun	Fully Exposed	Foraging	Leaves	21/10/2021	Afternoon	Wet
13:30:09	58.45	1031.62	M	Adult	Kevin	29.1	29.1	30.4	Closed	N/A	Sunny	Toward the Sun	Fully Exposed	Foraging	Leaves	21/10/2021	Afternoon	Wet
13:30:50	29.4	1031.62	M	Adult	Kevin	29.1	29.1	30.4	Closed	N/A	Sunny	Partially Away From the Sun	Fully Exposed	Foraging	Leaves	21/10/2021	Afternoon	Wet
13:34:12	302.06	1031.62	M	Adult	Kevin	29.1	29.1	30.4	Closed	N/A	Sunny	Partially Away From the Sun	Fully Exposed	Foraging	Leaves	21/10/2021	Afternoon	Wet
13:40:00	229.34	1031.62	M	Adult	Kevin	29.1	29.1	30.4	Closed	N/A	Sunny	Directly Away From the Sun	Partially Exposed	Foraging	Leaves	21/10/2021	Afternoon	Wet
13:40:33	45.7	1031.62	M	Adult	Kevin	29.1	29.1	30.4	Closed	N/A	Sunny	Directly Away From the Sun	Partially Exposed	Foraging	Leaves	21/10/2021	Afternoon	Wet
14:02:56	112.85	1031.62	M	Adult	Dark Male	29.1	29.1	30.4	Closed	N/A	Sunny	Toward the Sun	No Exposure	Foraging	Leaves	21/10/2021	Afternoon	Wet
14:04:35	213.67	1031.62	M	Adult	Dark Male	29.1	29.1	30.4	Closed	N/A	Sunny	Toward the Sun	No Exposure	Foraging	Leaves	21/10/2021	Afternoon	Wet
14:05:12	116.53	1031.62	M	Adult	Dark Male	29.1	29.1	30.4	Closed	N/A	Sunny	Partially Away From the Sun	Partially Exposed	Foraging	Leaves	21/10/2021	Afternoon	Wet
14:46:45	285.34	1031.62	M	Adult	Sun	29.1	29.1	30.4	Open	N/A	Cloudy	Partially Away From the Sun	Partially Exposed	Foraging	Leaves	21/10/2021	Afternoon	Wet
14:47:24	268.51	1031.62	M	Adult	Sun	29.1	29.1	30.4	Open	N/A	Cloudy	Toward the Sun	Partially Exposed	Foraging	Leaves	21/10/2021	Afternoon	Wet
14:48:12	448.48	1031.62	M	Adult	Sun	29.1	29.1	30.4	Open	N/A	Cloudy	Partially Away From the Sun	Partially Exposed	Foraging	Leaves	21/10/2021	Afternoon	Wet
12:32:52	215.55	1031.62	M	Juvenile	Felix	27.5	32.3	33.5	Open	N/A	Cloudy	Partially Away From the Sun	No Exposure	Foraging	Leaves	22/10/2021	Afternoon	Wet
17:18:36	204.43	1031.62	F	Adult	Madame Butterfly	33.1	32.1	33.5	Closed	N/A	Cloudy	Partially Away From the Sun	No Exposure	Foraging	Leaves	22/10/2021	Evening	Wet
17:19:12	57.61	1031.62	F	Adult	Madame Butterfly	33.1	32.1	33.5	Closed	N/A	Cloudy	Directly Away From the Sun	Partially Exposed	Foraging	Leaves	22/10/2021	Evening	Wet
17:19:47	286.97	1031.62	F	Adult	Madame Butterfly	33.1	32.1	33.5	Closed	N/A	Cloudy	Partially Away From the Sun	Partially Exposed	Foraging	Leaves	22/10/2021	Evening	Wet
10:27:48	358.35	1031.62	F	Adult	Noumea	23.4	24.5	29.2	Closed	N/A	Overcast	Cloudy Day	Cloudy Day	Foraging	Leaves	25/10/2021	Morning	Wet
10:28:20	41.83	1031.62	F	Adult	Noumea	23.4	24.5	29.2	Closed	N/A	Overcast	Cloudy Day	Cloudy Day	Foraging	Leaves	25/10/2021	Morning	Wet
10:28:48	26.82	1031.62	F	Adult	Noumea	23.4	24.5	29.2	Closed	N/A	Overcast	Cloudy Day	Cloudy Day	Foraging	Leaves	25/10/2021	Morning	Wet
10:29:17	25.39	1031.62	F	Adult	Noumea	23.4	24.5	29.2	Closed	N/A	Overcast	Cloudy Day	Cloudy Day	Foraging	Leaves	25/10/2021	Morning	Wet
10:29:52	118.44	1031.62	F	Adult	Noumea	23.4	24.5	29.2	Closed	N/A	Overcast	Cloudy Day	Cloudy Day	Foraging	Leaves	25/10/2021	Morning	Wet
10:44:55	216.37	1031.62	F	Adult	Noumea	23.4	24.5	29.2	Closed	N/A	Overcast	Cloudy Day	Cloudy Day	Foraging	Leaves	25/10/2021	Morning	Wet
15:23:48	57.59		F	Adult	Emily	25.9	24.3	29.2	Open	N/A	Cloudy	Toward the Sun	No Exposure	Foraging	Leaves	25/10/2021	Evening	Wet
15:24:46	21.22	890.87	F	Adult	Emily	25.9	24.3	29.2	Open	N/A	Cloudy	Partially Away From the Sun	No Exposure	Foraging	Leaves	25/10/2021	Evening	Wet
15:26:09	45.26	890.87	F	Adult	Emily	25.9	24.3	29.2	Open	N/A	Cloudy	Toward the Sun	No Exposure	Foraging	Leaves	25/10/2021	Evening	Wet
15:26:45	66.16	890.87	F	Adult	Emily	25.9	24.3	29.2	Open	N/A	Cloudy	Partially Away From the Sun	No Exposure	Foraging	Leaves	25/10/2021	Evening	Wet
15:27:20	211.46	890.87	F	Adult	Emily	25.9	24.3	29.2	Open	N/A	Cloudy	Toward the Sun	No Exposure	Foraging	Leaves	25/10/2021	Evening	Wet
15:29:10	55.56	890.87	F	Adult	Emily	25.9	24.3	29.2	Open	N/A	Cloudy	Partially Away From the Sun	No Exposure	Foraging	Leaves	25/10/2021	Evening	Wet
15:36:21	106.44	890.87	F	Adult	Emily	25.9	24.3	29.2	Open	N/A	Cloudy	Directly Away From the Sun	Fully Exposed	Foraging	Leaves	25/10/2021	Evening	Wet
15:37:02	196.12	890.87	F	Adult	Emily	25.9	24.3	29.2	Open	N/A	Cloudy	Partially Away From the Sun	No Exposure	Foraging	Leaves	25/10/2021	Evening	Wet
15:37:29	131.06	890.87	F	Adult	Emily	25.9	24.3	29.2	Open	N/A	Cloudy	Toward the Sun	No Exposure	Foraging	Leaves	25/10/2021	Evening	Wet
15:38:03	352.02	492.37	F	Adult	Wolke	25.9	24.3	29.2	Open	N/A	Cloudy	Partially Away From the Sun	No Exposure	Foraging	Leaves	25/10/2021	Evening	Wet
15:38:38	22.68	492.37	F	Adult	Wolke	25.9	24.3	29.2	Open	N/A	Cloudy	Partially Away From the Sun	Fully Exposed	Foraging	Leaves	25/10/2021	Evening	Wet
15:39:38	72.67	492.37	F	Adult	Wolke	25.9	24.3	29.2	Open	N/A	Cloudy	Directly Away From the Sun	Fully Exposed	Foraging	Leaves	25/10/2021	Evening	Wet
15:40:13	45	492.37	F	Adult	Wolke	25.9	24.3	29.2	Open	N/A	Cloudy	Partially Away From the Sun	Fully Exposed	Foraging	Leaves	25/10/2021	Evening	Wet
15:48:06	150.92	744.55	F	Adult	Madame Butterfly	25.9	24.3	29.2	Open	N/A	Cloudy	Partially Away From the Sun	No Exposure	Foraging	Leaves	25/10/2021	Evening	Wet
15:56:27	430.25	744.55	F	Adult	Madame Butterfly	25.9	24.3	29.2	Open	N/A	Cloudy	Partially Away From the Sun	No Exposure	Foraging	Leaves	25/10/2021	Evening	Wet
15:57:01	85.2	744.55	F	Adult	Madame Butterfly	25.9	24.3	29.2	Open	N/A	Cloudy	Toward the Sun	No Exposure	Foraging	Leaves	25/10/2021	Evening	Wet
15:57:26	78.18	744.55	F	Adult	Madame Butterfly	25.9	24.3	29.2	Open	N/A	Cloudy	Partially Away From the Sun	No Exposure	Foraging	Leaves	25/10/2021	Evening	Wet
13:46:55	157.02	445.5	M	Adult	Aquarius	24	24.9	26	Open	N/A	Overcast	Cloudy Day	Cloudy Day	Foraging	Leaves	26/10/2021	Afternoon	Wet
13:48:13	17.02	445.5	M	Adult	Aquarius	24	24.9	26	Open	N/A	Overcast	Cloudy Day	Cloudy Day	Foraging	Leaves	26/10/2021	Afternoon	Wet
13:48:39	6.56	445.5	M	Adult	Aquarius	24	24.9	26	Open	N/A	Overcast	Cloudy Day	Cloudy Day	Foraging	Leaves	26/10/2021	Afternoon	Wet
13:49:19	148.85	445.5	M	Adult	Aquarius	24	24.9	26	Open	N/A	Overcast	Cloudy Day	Cloudy Day	Foraging	Leaves	26/10/2021	Afternoon	Wet
13:52:06	116.05	445.5	M	Adult	Aquarius	24	24.9	26	Closed	N/A	Overcast	Cloudy Day	Cloudy Day	Foraging	Leaves	26/10/2021	Afternoon	Wet
14:14:38	225.26	225	F	Adult	Vendetta	24	24.9	26	Open	N/A	Overcast	Cloudy Day	Cloudy Day	Foraging	Leaves	26/10/2021	Afternoon	Wet
14:15:17	118.18	261.38	F	Adult	Pex	24	24.9	26	Open	N/A	Overcast	Cloudy Day	Cloudy Day	Foraging	Leaves	26/10/2021	Afternoon	Wet
14:15:47	143.2	261.38	F	Adult	Pex	24	24.9	26	Open	N/A	Overcast	Cloudy Day	Cloudy Day	Foraging	Leaves	26/10/2021	Afternoon	Wet
14:16:27	38.28	142	F	Adult	Vendetta	24	24.9	26	Open	N/A	Overcast	Cloudy Day	Cloudy Day	Foraging	Leaves	26/10/2021	Afternoon	Wet
14:16:59	104.1	142	F	Adult	Vendetta	24	24.9	26	Open	N/A	Overcast	Cloudy Day	Cloudy Day	Foraging	Leaves	26/10/2021	Afternoon	Wet
14:17:28	119.23	119	F	Adult	Pex	24	24.9	26	Open	N/A	Overcast	Cloudy Day	Cloudy Day	Foraging	Leaves	26/10/2021	Afternoon	Wet
14:18:00	279.72	280	F	Adult	Vendetta	24	24.9	26	Open	N/A	Overcast	Cloudy Day	Cloudy Day	Foraging	Leaves	26/10/2021	Afternoon	Wet
14:18:29	279.72	280	F	Adult	Pex	24	24.9	26	Open	N/A	Overcast	Cloudy Day	Cloudy Day	Foraging	Leaves	26/10/2021	Afternoon	Wet
14:43:49	186.42	607.78	M	Juvenile	Felix	24	24.9	26	Open	N/A	Overcast	Cloudy Day	Cloudy Day	Foraging	Leaves	26/10/2021	Afternoon	Wet
14:44:19	26.65	607.78	M	Juvenile	Felix	24	24.9	26	Open	N/A	Overcast	Cloudy Day	Cloudy Day	Foraging	Leaves	26/10/2021	Afternoon	Wet
14:44:48	205.74	607.78	M	Juvenile	Felix	24	24.9	26	Open	N/A	Overcast	Cloudy Day	Cloudy Day	Foraging	Leaves	26/10/2021	Afternoon	Wet
14:45:20	188.97	607.78	M	Juvenile	Felix	24	24.9	26	Open	N/A	Overcast	Cloudy Day	Cloudy Day	Foraging	Leaves	26/10/2021	Afternoon	Wet
14:46:01	221.64	392.13	M	Sub-Adult	Forest	24	24.9	26	Open	N/A	Overcast	Cloudy Day	Cloudy Day	Foraging	Leaves	26/10/2021	Afternoon	Wet
14:46:32	73.22	392.13	M	Sub-Adult	Forest	24	24.9	26	Open	N/A	Overcast	Cloudy Day	Cloudy Day	Foraging	Leaves	26/10/2021	Afternoon	Wet
14:47:08	31.74	392.13	M	Sub-Adult	Forest	24	24.9	26	Open	N/A	Overcast	Cloudy Day	Cloudy Day	Foraging	Leaves	26/10/2021	Afternoon	Wet
14:47:38	65.53	392.13	M	Sub-Adult	Forest	24	24.9	26	Open	N/A	Overcast	Cloudy Day	Cloudy Day	Foraging	Leaves	26/10/2021	Afternoon	Wet
16:03:45	1262.55	1263	F	Adult	Emma	27.4	25.8	28.5	Closed	N/A	Overcast	Cloudy Day	Cloudy Day	Foraging	Leaves	27/10/2021	Evening	Wet
07:50:35	104.5	119	M	Sub-Adult	Skinny	21.7	24.5	26.5	Road	N/A	Overcast	Cloudy Day	Cloudy Day	Foraging	Leaves	28/10/2021	Morning	Wet
07:51:11	13.64	119	M	Adult	Skinny	21.7	24.5	26.5	Road	N/A	Overcast	Cloudy Day	Cloudy Day	Foraging	Leaves	28/10/2021	Morning	Wet
08:17:02	104.63	468.78	M	Adult	Charlie	21.7	24.5	26.5	Road	N/A	Overcast	Cloudy Day	Cloudy Day	Foraging	Leaves	28/10/2021	Morning	Wet
08:17:32	364.15	468.78	M	Sub-Adult	Charlie	21.7	24.5	26.5	Road	N/A	Overcast	Cloudy Day	Cloudy Day	Foraging	Leaves	28/10/2021	Morning	Wet
08:35:48	47.6	334.46	M	Sub-Adult	Skinny	21.7	24.5	26.5	Closed	N/A	Overcast	Cloudy Day	Cloudy Day	Foraging	Leaves	28/10/2021	Morning	Wet
08:36:25	136.53	334.46	M	Sub-Adult	Skinny	21.7	24.5	26.5	Closed	N/A	Overcast	Cloudy Day	Cloudy Day	Foraging	Leaves	28/10/2021	Morning	Wet
08:42:39	30.12	334.46	M	Sub-Adult	Skinny	21.7	24.5	26.5	Closed	N/A	Overcast	Cloudy Day	Cloudy Day	Foraging	Leaves	28/10/2021	Morning	Wet
08:43:13	48.01	334.46	M	Sub-Adult	Skinny	21.7	24.5	26.5	Closed	N/A	Overcast	Cloudy Day	Cloudy Day	Foraging	Leaves	28/10/2021	Morning	Wet
08:44:44	58.15	334.46	M	Sub-Adult	Skinny	21.7	24.5	26.5	Closed	N/A	Overcast	Cloudy Day	Cloudy Day	Foraging	Leaves	28/10/2021	Morning	Wet
08:45:23	14.05	334.46	M	Sub-Adult	Skinny	21.7	24.5	26.5	Closed	N/A	Overcast	Cloudy Day	Cloudy Day	Foraging	Leaves	28/10/2021	Morning	Wet
09:30:22	44.26	452.82	F	Adult	Madame Butterfly	21.7	24.5	26.5	Closed	N/A	Overcast	Cloudy Day	Cloudy Day	Foraging	Leaves	28/10/2021	Morning	Wet
09:30:49	7.31	452.82	F	Adult	Madame Butterfly	21.7	24.5	26.5	Closed	N/A	Overcast	Cloudy Day	Cloudy Day	Foraging	Leaves	28/10/2021	Morning	Wet
09:31:14	9.8	452.82	F	Adult	Madame Butterfly	21.7	24.5	26.5	Closed	N/A	Overcast	Cloudy Day	Cloudy Day	Foraging	Leaves	28/10/2021	Morning	Wet
09:32:00	61.34	452.82	F	Adult	Madame Butterfly	21.7	24.5	26.5	Closed	N/A	Overcast	Cloudy Day	Cloudy Day	Foraging	Leaves	28/10/2021	Morning	Wet
09:32:42	103.13	452.82	F	Adult	Madame Butterfly	21.7	24.5	26.5	Closed	N/A	Overcast	Cloudy Day	Cloudy Day	Foraging	Leaves	28/10/2021	Morning	Wet
09:39:34	124.56	452.82	F	Adult	Madame Butterfly	21.7	24.5	26.5	Closed	N/A	Overcast	Cloudy Day	Cloudy Day	Foraging	Leaves	28/10/2021	Morning	Wet
09:40:21	102.42	452.82	F	Adult	Madame Butterfly	21.7	24.5	26.5	Closed	N/A	Overcast	Cloudy Day	Cloudy Day	Foraging	Leaves	28/10/2021	Morning	Wet
13:41:32	62.28	422.55	M	Adult	McFly	25.5	25.5	26.5	Open	N/A	Overcast	Cloudy Day	Cloudy Day	Foraging	Leaves	28/10/2021	Afternoon	Wet
13:41:55	22.84	422.55	M	Adult	McFly	25.5	25.5	26.5	Open	N/A	Overcast	Cloudy Day	Cloudy Day	Foraging	Leaves	28/10/2021	Afternoon	Wet
13:42:25	337.43	422.55	M	Adult	McFly	25.5	25.5	26.5	Open	N/A	Overcast	Cloudy Day	Cloudy Day	Foraging	Leaves	28/10/2021	Afternoon	Wet
13:50:38	38.9	87	F	Adult	Kagiso	25.5	25.5	26.5	Closed	N/A	Overcast	Cloudy Day	Cloudy Day	Foraging	Leaves	28/10/2021	Afternoon	Wet
13:54:57	47.77	87	F	Adult	Kagiso	25.5	25.5	26.5	Open	N/A	Overcast	Cloudy Day	Cloudy Day	Foraging	Leaves	28/10/2021	Afternoon	Wet
14:00:50	73.88	74	M	Sub-Adult	Braai	25.5	25.5	26.5	Open	N/A	Overcast	Cloudy Day	Cloudy Day	Foraging	Leaves	28/10/2021	Afternoon	Wet
11:39:09	179.37	179	F	Sub-Adult	Walter	24.4	28.6	30.1	Open	N/A	Sunny	Partially Away From the Sun	Fully Exposed	Foraging	Leaves	29/10/2021	Afternoon	Wet
11:40:02	100.43	100	M	Sub-Adult	Flamenkuchen	24.4	28.6	30.1	Open	N/A	Sunny	Partially Away From the Sun	Fully Exposed	Foraging	Leaves	29/10/2021	Afternoon	Wet
11:40:36	30.83	31	F	Sub-Adult	Walter	24.4	28.6	30.1	Closed	N/A	Sunny	Toward the Sun	Partially Exposed	Foraging	Leaves	29/10/2021	Afternoon	Wet
12:11:40	245.65	717.78	M	Juvenile	Sami	24.4	28.6	30.1	Road	N/A	Sunny	Directly Away From the Sun	Fully Exposed	Foraging	Leaves	29/10/2021	Afternoon	Wet
12:12:40	95.57	717.78	M	Juvenile	Sami	24.4	28.6	30.1	Road	N/A	Sunny	Directly Away From the Sun	Fully Exposed	Foraging	Leaves	29/10/2021	Afternoon	Wet
12:13:19	27.83	717.78	M	Juvenile	Sami	24.4	28.6	30.1	Road	N/A	Sunny	Directly Away From the Sun	Fully Exposed	Foraging	Leaves	29/10/2021	Afternoon	Wet
12:13:59	348.73	717.78	M	Juvenile	Sami	24.4	28.6	30.1	Road	N/A	Sunny	Directly Away From the Sun	Fully Exposed	Foraging	Leaves	29/10/2021	Afternoon	Wet
11:49:08	106.75	454.6	M	Adult	Kevin	32.5	37.4	40.2	Open	N/A	Sunny	Partially Away From the Sun	Partially Exposed	Foraging	Leaves	02/11/2021	Afternoon	Wet
11:49:39	123.77	454.6	M	Adult	Kevin	32.5	37.4	40.2	Open	N/A	Sunny	Toward the Sun	Partially Exposed	Foraging	Leaves	02/11/2021	Afternoon	Wet
11:50:12	20.49	454.6	M	Adult	Kevin	32.5	37.4	40.2	Open	N/A	Sunny	Partially Away From the Sun	Partially Exposed	Foraging	Leaves	02/11/2021	Afternoon	Wet
11:51:14	141.98	454.6	M	Adult	Kevin	32.5	37.4	40.2	Open	N/A	Sunny	Partially Away From the Sun	Partially Exposed	Foraging	Leaves	02/11/2021	Afternoon	Wet
11:51:54	61.61	454.6	M	Adult	Kevin	32.5	37.4	40.2	Open	N/A	Sunny	Partially Away From the Sun	No Exposure	Foraging	Leaves	02/11/2021	Afternoon	Wet
16:16:12	25.08	74	F	Adult	Flower	40.1	38.8	40.2	Closed	N/A	Cloudy	Partially Away From the Sun	Fully Exposed	Foraging	Leaves	02/11/2021	Evening	Wet
16:16:42	48.92	74	F	Adult	Flower	40.1	38.8	40.2	Closed	N/A	Cloudy	Partially Away From the Sun	Fully Exposed	Foraging	Leaves	02/11/2021	Evening	Wet
16:53:59	402.42	525.2	M	Sub-Adult	Night	40.1	38.8	40.2	Road	N/A	Cloudy	Partially Away From the Sun	No Exposure	Foraging	Leaves	02/11/2021	Evening	Wet
16:54:36	34.29	525.2	M	Sub-Adult	Night	40.1	38.8	40.2	Road	N/A	Cloudy	Toward the Sun	No Exposure	Foraging	Leaves	02/11/2021	Evening	Wet
16:55:07	88.49	525.2	M	Sub-Adult	Night	40.1	38.8	40.2	Road	N/A	Cloudy	Toward the Sun	No Exposure	Foraging	Leaves	02/11/2021	Evening	Wet
08:28:54	36.67	872.54	M	Adult	Polp	26.9	31.1	35.2	Open	N/A	Sunny	Toward the Sun	No Exposure	Foraging	Leaves	03/11/2021	Morning	Wet
08:29:34	440.64	872.54	M	Adult	Polp	26.9	31.1	35.2	Open	N/A	Sunny	Partially Away From the Sun	No Exposure	Foraging	Leaves	03/11/2021	Morning	Wet
08:30:07	244.42	872.54	M	Adult	Polp	26.9	31.1	35.2	Open	N/A	Sunny	Partially Away From the Sun	No Exposure	Foraging	Leaves	03/11/2021	Morning	Wet
08:30:44	150.81	872.54	M	Adult	Polp	26.9	31.1	35.2	Open	N/A	Sunny	Toward the Sun	No Exposure	Foraging	Leaves	03/11/2021	Morning	Wet
09:13:13	58.44	1010.16	M	Juvenile	Kaleb	26.9	31.1	35.2	Open	N/A	Sunny	Partially Away From the Sun	No Exposure	Foraging	Leaves	03/11/2021	Morning	Wet
09:13:50	43.84	1010.16	M	Juvenile	Kaleb	26.9	31.1	35.2	Open	N/A	Sunny	Partially Away From the Sun	No Exposure	Foraging	Leaves	03/11/2021	Morning	Wet
09:14:33	74.58	1010.16	M	Juvenile	Kaleb	26.9	31.1	35.2	Open	N/A	Sunny	Partially Away From the Sun	No Exposure	Foraging	Leaves	03/11/2021	Morning	Wet
09:15:10	110.33	1010.16	M	Juvenile	Kaleb	26.9	31.1	35.2	Open	N/A	Sunny	Partially Away From the Sun	No Exposure	Foraging	Leaves	03/11/2021	Morning	Wet
09:15:59	251.23	1010.16	M	Juvenile	Kaleb	26.9	31.1	35.2	Open	N/A	Sunny	Toward the Sun	Partially Exposed	Foraging	Leaves	03/11/2021	Morning	Wet
09:16:50	76.32	1010.16	M	Juvenile	Kaleb	26.9	31.1	35.2	Open	N/A	Sunny	Directly Away From the Sun	Fully Exposed	Foraging	Leaves	03/11/2021	Morning	Wet
09:17:42	40.59	1010.16	M	Juvenile	Kaleb	26.9	31.1	35.2	Open	N/A	Sunny	Partially Away From the Sun	No Exposure	Foraging	Leaves	03/11/2021	Morning	Wet
09:18:26	80.11	1010.16	M	Juvenile	Kaleb	26.9	31.1	35.2	Open	N/A	Sunny	Partially Away From the Sun	No Exposure	Foraging	Leaves	03/11/2021	Morning	Wet
09:19:17	274.72	1010.16	M	Juvenile	Kaleb	26.9	31.1	35.2	Open	N/A	Sunny	Partially Away From the Sun	No Exposure	Foraging	Leaves	03/11/2021	Morning	Wet
09:20:01	395.42	791.14	M	Juvenile	Felix	26.9	31.1	35.2	Open	N/A	Sunny	Partially Away From the Sun	Fully Exposed	Foraging	Leaves	03/11/2021	Morning	Wet
09:21:03	352.44	791.14	M	Juvenile	Felix	26.9	31.1	35.2	Open	N/A	Sunny	Partially Away From the Sun	Fully Exposed	Foraging	Leaves	03/11/2021	Morning	Wet
09:21:46	43.28	791.14	M	Juvenile	Felix	26.9	31.1	35.2	Open	N/A	Sunny	Toward the Sun	Fully Exposed	Foraging	Leaves	03/11/2021	Morning	Wet
09:26:13	68.82	1027.65	F	Adult	Kagiso	26.9	31.1	35.2	Open	N/A	Sunny	Partially Away From the Sun	Fully Exposed	Foraging	Leaves	03/11/2021	Morning	Wet
09:41:43	470.88	1027.65	F	Adult	Kagiso	26.9	31.1	35.2	Open	N/A	Sunny	Partially Away From the Sun	Fully Exposed	Foraging	Leaves	03/11/2021	Morning	Wet
09:42:22	106.89	1027.65	F	Adult	Kagiso	26.9	31.1	35.2	Open	N/A	Sunny	Partially Away From the Sun	Partially Exposed	Foraging	Leaves	03/11/2021	Morning	Wet
09:42:54	381.06	1027.65	F	Adult	Kagiso	26.9	31.1	35.2	Open	N/A	Sunny	Toward the Sun	Partially Exposed	Foraging	Leaves	03/11/2021	Morning	Wet
07:59:09	83.25	1743.88	M	Adult	Lovely	27.3	30.4	34.9	Road	N/A	Sunny	Toward the Sun	Partially Exposed	Foraging	Leaves	04/11/2021	Morning	Wet
08:01:34	95.67	1743.88	M	Adult	Lovely	27.3	30.4	34.9	Road	N/A	Sunny	Partially Away From the Sun	Fully Exposed	Foraging	Leaves	04/11/2021	Morning	Wet
08:02:08	713.45	1743.88	M	Adult	Lovely	27.3	30.4	34.9	Road	N/A	Sunny	Directly Away From the Sun	Fully Exposed	Foraging	Leaves	04/11/2021	Morning	Wet
08:02:41	92.84	1743.88	M	Adult	Lovely	27.3	30.4	34.9	Road	N/A	Sunny	Toward the Sun	No Exposure	Foraging	Leaves	04/11/2021	Morning	Wet
08:03:17	78.87	1743.88	M	Adult	Lovely	27.3	30.4	34.9	Road	N/A	Sunny	Partially Away From the Sun	No Exposure	Foraging	Leaves	04/11/2021	Morning	Wet
08:06:48	679.8	1743.88	M	Adult	Lovely	27.3	30.4	34.9	Road	N/A	Sunny	Partially Away From the Sun	Fully Exposed	Foraging	Leaves	04/11/2021	Morning	Wet
08:27:50	19.41	813.62	M	Adult	McFly	27.3	30.4	34.9	Closed	N/A	Sunny	Toward the Sun	Partially Exposed	Foraging	Leaves	04/11/2021	Morning	Wet
08:28:18	243.98	813.62	M	Adult	McFly	27.3	30.4	34.9	Closed	N/A	Sunny	Partially Away From the Sun	Partially Exposed	Foraging	Leaves	04/11/2021	Morning	Wet
08:30:47	154.37	813.62	M	Adult	McFly	27.3	30.4	34.9	Closed	N/A	Sunny	Toward the Sun	Partially Exposed	Foraging	Leaves	04/11/2021	Morning	Wet
08:32:10	56.41	813.62	M	Adult	McFly	27.3	30.4	34.9	Closed	N/A	Sunny	Directly Away From the Sun	Fully Exposed	Foraging	Leaves	04/11/2021	Morning	Wet
08:32:50	50.76	813.62	M	Adult	McFly	27.3	30.4	34.9	Closed	N/A	Sunny	Partially Away From the Sun	Fully Exposed	Foraging	Leaves	04/11/2021	Morning	Wet
08:39:20	288.69	813.62	M	Adult	McFly	27.3	30.4	34.9	Closed	N/A	Sunny	Partially Away From the Sun	Partially Exposed	Foraging	Leaves	04/11/2021	Morning	Wet
09:08:58	89.07	1657.13	M	Adult	Aquarius	27.3	30.4	34.9	Closed	N/A	Sunny	Toward the Sun	No Exposure	Foraging	Leaves	04/11/2021	Morning	Wet
09:09:29	304.35	1657.13	M	Adult	Aquarius	27.3	30.4	34.9	Closed	N/A	Sunny	Toward the Sun	No Exposure	Foraging	Leaves	04/11/2021	Morning	Wet
09:10:03	195.23	1657.13	M	Adult	Aquarius	27.3	30.4	34.9	Closed	N/A	Sunny	Partially Away From the Sun	No Exposure	Foraging	Leaves	04/11/2021	Morning	Wet
09:10:41	573.56	1657.13	M	Adult	Aquarius	27.3	30.4	34.9	Closed	N/A	Sunny	Partially Away From the Sun	No Exposure	Foraging	Leaves	04/11/2021	Morning	Wet
09:11:11	212.38	1657.13	M	Adult	Aquarius	27.3	30.4	34.9	Closed	N/A	Sunny	Toward the Sun	No Exposure	Foraging	Leaves	04/11/2021	Morning	Wet
09:11:36	282.54	1657.13	M	Adult	Aquarius	27.3	30.4	34.9	Closed	N/A	Sunny	Partially Away From the Sun	Fully Exposed	Foraging	Leaves	04/11/2021	Morning	Wet
09:44:04	824.81	1266.81	M	Adult	Dark Male	27.3	30.4	34.9	Closed	N/A	Sunny	Partially Away From the Sun	Fully Exposed	Foraging	Leaves	04/11/2021	Morning	Wet
09:44:28	442	1266.81	M	Adult	Dark Male	27.3	30.4	34.9	Closed	N/A	Sunny	Toward the Sun	No Exposure	Foraging	Leaves	04/11/2021	Morning	Wet
14:19:33	122.97	599.31	M	Adult	Kevin	34.3	34.5	34.9	Open	N/A	Sunny	Partially Away From the Sun	Partially Exposed	Foraging	Leaves	04/11/2021	Evening	Wet
14:20:19	22.38	599.31	M	Adult	Kevin	34.3	34.5	34.9	Open	N/A	Sunny	Toward the Sun	Fully Exposed	Foraging	Leaves	04/11/2021	Evening	Wet
14:20:56	42.49	599.31	M	Adult	Kevin	34.3	34.5	34.9	Open	N/A	Sunny	Partially Away From the Sun	Partially Exposed	Foraging	Leaves	04/11/2021	Evening	Wet
14:28:04	273.79	599.31	M	Adult	Kevin	34.3	34.5	34.9	Open	N/A	Sunny	Partially Away From the Sun	No Exposure	Foraging	Leaves	04/11/2021	Evening	Wet
14:28:35	41.19	599.31	M	Adult	Kevin	34.3	34.5	34.9	Open	N/A	Sunny	Toward the Sun	Partially Exposed	Foraging	Leaves	04/11/2021	Evening	Wet
14:29:19	50.72	599.31	M	Adult	Kevin	34.3	34.5	34.9	Open	N/A	Sunny	Partially Away From the Sun	Fully Exposed	Foraging	Leaves	04/11/2021	Evening	Wet
14:30:00	45.77	599.31	M	Adult	Kevin	34.3	34.5	34.9	Open	N/A	Sunny	Toward the Sun	Fully Exposed	Foraging	Leaves	04/11/2021	Evening	Wet
16:36:48	17.31	761.32	M	Adult	Sun	37.1	35.1	37.9	Open	N/A	Sunny	Partially Away From the Sun	Fully Exposed	Foraging	Leaves	05/11/2021	Evening	Wet
16:38:59	454.39	761.32	M	Adult	Sun	37.1	35.1	37.9	Open	N/A	Sunny	Toward the Sun	Partially Exposed	Foraging	Leaves	05/11/2021	Evening	Wet
16:40:14	20.41	761.32	M	Adult	Sun	37.1	35.1	37.9	Open	N/A	Sunny	Partially Away From the Sun	Fully Exposed	Foraging	Leaves	05/11/2021	Evening	Wet
16:40:44	100.06	761.32	M	Adult	Sun	37.1	35.1	37.9	Open	N/A	Sunny	Partially Away From the Sun	Fully Exposed	Foraging	Leaves	05/11/2021	Evening	Wet
16:44:14	103.76	761.32	M	Adult	Sun	37.1	35.1	37.9	Open	N/A	Sunny	Partially Away From the Sun	No Exposure	Foraging	Leaves	05/11/2021	Evening	Wet
16:44:50	65.39	761.32	M	Adult	Sun	37.1	35.1	37.9	Open	N/A	Sunny	Partially Away From the Sun	No Exposure	Foraging	Leaves	05/11/2021	Evening	Wet
16:52:38	31.39	926.83	M	Adult	Lovely	37.1	35.1	37.9	Open	N/A	Sunny	Toward the Sun	Fully Exposed	Foraging	Leaves	05/11/2021	Evening	Wet
17:03:43	652.44	926.83	M	Adult	Lovely	37.1	35.1	37.9	Open	N/A	Sunny	Toward the Sun	No Exposure	Foraging	Leaves	05/11/2021	Evening	Wet
17:04:10	243	926.83	M	Adult	Lovely	37.1	35.1	37.9	Open	N/A	Sunny	Toward the Sun	No Exposure	Foraging	Leaves	05/11/2021	Evening	Wet
17:10:36	99.79	964.3	F	Adult	Nala	37.1	35.1	37.9	Open	N/A	Sunny	Partially Away From the Sun	Fully Exposed	Foraging	Leaves	05/11/2021	Evening	Wet
17:11:12	21.26	964.3	F	Adult	Nala	37.1	35.1	37.9	Open	N/A	Sunny	Partially Away From the Sun	Fully Exposed	Foraging	Leaves	05/11/2021	Evening	Wet
17:14:32	106.69	964.3	F	Adult	Nala	37.1	35.1	37.9	Open	N/A	Sunny	Toward the Sun	Partially Exposed	Foraging	Leaves	05/11/2021	Evening	Wet
17:15:14	144.58	964.3	F	Adult	Nala	37.1	35.1	37.9	Open	N/A	Sunny	Toward the Sun	Partially Exposed	Foraging	Leaves	05/11/2021	Evening	Wet
17:22:02	591.98	964.3	F	Adult	Nala	37.1	35.1	37.9	Open	N/A	Sunny	Partially Away From the Sun	Fully Exposed	Foraging	Leaves	05/11/2021	Evening	Wet
11:27:21	183.26	183	F	Adult	Noumea	33.4	33.4	35.9	Road	N/A	Sunny	Partially Away From the Sun	No Exposure	Foraging	Leaves	11/11/2021	Afternoon	Wet
15:58:52	206.89	1071.17	M	Adult	Kevin	35.8	33.7	35.9	Closed	N/A	Cloudy	Directly Away From the Sun	Fully Exposed	Foraging	Leaves	11/11/2021	Evening	Wet
15:59:28	438.84	1071.17	M	Adult	Kevin	35.8	33.7	35.9	Closed	N/A	Cloudy	Partially Away From the Sun	Fully Exposed	Foraging	Leaves	11/11/2021	Evening	Wet
16:09:59	425.44	1071.17	M	Adult	Kevin	35.8	33.7	35.9	Closed	N/A	Cloudy	Partially Away From the Sun	Fully Exposed	Foraging	Leaves	11/11/2021	Evening	Wet
10:30:03	61.84	235.71	F	Adult	Nala	32.8	36.2	37.8	Road	N/A	Sunny	Toward the Sun	Fully Exposed	Foraging	Leaves	12/11/2021	Morning	Wet
10:33:05	162.89	235.71	F	Adult	Nala	32.8	36.2	37.8	Road	N/A	Sunny	Directly Away From the Sun	Partially Exposed	Foraging	Leaves	12/11/2021	Morning	Wet
10:33:56	10.98	235.71	F	Adult	Nala	32.8	36.2	37.8	Road	N/A	Sunny	Toward the Sun	No Exposure	Foraging	Leaves	12/11/2021	Morning	Wet
11:04:49	28.23	867.98	F	Adult	Emily	32.8	36.2	37.8	Open	N/A	Sunny	Partially Away From the Sun	Fully Exposed	Foraging	Leaves	12/11/2021	Afternoon	Wet
11:05:33	55.07	867.98	F	Adult	Emily	32.8	36.2	37.8	Open	N/A	Sunny	Directly Away From the Sun	Fully Exposed	Foraging	Leaves	12/11/2021	Afternoon	Wet
11:06:36	470.39	867.98	F	Adult	Emily	32.8	36.2	37.8	Open	N/A	Sunny	Partially Away From the Sun	Partially Exposed	Foraging	Leaves	12/11/2021	Afternoon	Wet
11:11:36	314.29	867.98	F	Adult	Emily	32.8	36.2	37.8	Open	N/A	Sunny	Partially Away From the Sun	Fully Exposed	Foraging	Leaves	12/11/2021	Afternoon	Wet
11:20:07	289.06	809.07	F	Adult	Vendetta	32.8	36.2	37.8	Open	N/A	Sunny	Partially Away From the Sun	Partially Exposed	Foraging	Leaves	12/11/2021	Afternoon	Wet
11:22:43	129.88	809.07	F	Adult	Vendetta	32.8	36.2	37.8	Closed	N/A	Sunny	Partially Away From the Sun	Fully Exposed	Foraging	Leaves	12/11/2021	Afternoon	Wet
11:23:16	72.93	809.07	F	Adult	Vendetta	32.8	36.2	37.8	Open	N/A	Sunny	Partially Away From the Sun	Fully Exposed	Foraging	Leaves	12/11/2021	Afternoon	Wet
11:26:02	168.11	809.07	F	Adult	Vendetta	32.8	36.2	37.8	Open	N/A	Sunny	Partially Away From the Sun	Fully Exposed	Foraging	Leaves	12/11/2021	Afternoon	Wet
11:28:34	149.09	809.07	F	Adult	Vendetta	32.8	36.2	37.8	Open	N/A	Sunny	Toward the Sun	Fully Exposed	Foraging	Leaves	12/11/2021	Afternoon	Wet
11:36:19	272.1	539.55	F	Adult	Kagiso	32.8	36.2	37.8	Open	N/A	Sunny	Toward the Sun	Partially Exposed	Foraging	Leaves	12/11/2021	Afternoon	Wet
11:36:53	91.98	539.55	F	Adult	Kagiso	32.8	36.2	37.8	Open	N/A	Sunny	Partially Away From the Sun	Partially Exposed	Foraging	Leaves	12/11/2021	Afternoon	Wet
11:37:30	175.47	539.55	F	Adult	Kagiso	32.8	36.2	37.8	Open	N/A	Sunny	Directly Away From the Sun	Fully Exposed	Foraging	Leaves	12/11/2021	Afternoon	Wet
11:46:11	98.5	646.29	M	Juvenile	Marseilles	32.8	36.2	37.8	Open	N/A	Sunny	Partially Away From the Sun	No Exposure	Foraging	Leaves	12/11/2021	Afternoon	Wet
11:46:54	61.54	646.29	M	Juvenile	Marseilles	32.8	36.2	37.8	Open	N/A	Sunny	Partially Away From the Sun	Partially Exposed	Foraging	Leaves	12/11/2021	Afternoon	Wet
11:47:31	92.02	646.29	M	Juvenile	Marseilles	32.8	36.2	37.8	Open	N/A	Sunny	Directly Away From the Sun	Partially Exposed	Foraging	Leaves	12/11/2021	Afternoon	Wet
11:48:15	32.57	646.29	M	Juvenile	Marseilles	32.8	36.2	37.8	Open	N/A	Sunny	Partially Away From the Sun	No Exposure	Foraging	Leaves	12/11/2021	Afternoon	Wet
11:49:11	241.72	646.29	M	Juvenile	Marseilles	32.8	36.2	37.8	Open	N/A	Sunny	Partially Away From the Sun	Fully Exposed	Foraging	Leaves	12/11/2021	Afternoon	Wet
11:51:32	119.94	646.29	M	Juvenile	Marseilles	32.8	36.2	37.8	Open	N/A	Sunny	Toward the Sun	Fully Exposed	Foraging	Leaves	12/11/2021	Afternoon	Wet
07:32:50	171.36	737.11	M	Adult	Aquarius	26.6	33	39	Closed	N/A	Sunny	Partially Away From the Sun	No Exposure	Foraging	Leaves	13/11/2021	Morning	Wet
07:34:41	19.21	737.11	M	Adult	Aquarius	26.6	33	39	Closed	N/A	Sunny	Partially Away From the Sun	No Exposure	Foraging	Leaves	13/11/2021	Morning	Wet
07:36:12	145.06	737.11	M	Adult	Aquarius	26.6	33	39	Open	N/A	Sunny	Toward the Sun	Partially Exposed	Foraging	Leaves	13/11/2021	Morning	Wet
07:52:46	88.54	737.11	M	Adult	Aquarius	26.6	33	39	Open	N/A	Sunny	Partially Away From the Sun	Fully Exposed	Foraging	Leaves	13/11/2021	Morning	Wet
07:53:15	42.11	737.11	M	Adult	Aquarius	26.6	33	39	Open	N/A	Sunny	Toward the Sun	Fully Exposed	Foraging	Leaves	13/11/2021	Morning	Wet
07:53:46	115.39	737.11	M	Adult	Aquarius	26.6	33	39	Open	N/A	Sunny	Partially Away From the Sun	Partially Exposed	Foraging	Leaves	13/11/2021	Morning	Wet
07:54:23	140.41	737.11	M	Adult	Aquarius	26.6	33	39	Open	N/A	Sunny	Partially Away From the Sun	No Exposure	Foraging	Leaves	13/11/2021	Morning	Wet
07:54:53	15.03	737.11	M	Adult	Aquarius	26.6	33	39	Open	N/A	Sunny	Toward the Sun	Partially Exposed	Foraging	Leaves	13/11/2021	Morning	Wet
07:55:25	76.44	335.89	M	Adult	Shadow	26.6	33	39	Open	N/A	Sunny	Toward the Sun	Fully Exposed	Foraging	Leaves	13/11/2021	Morning	Wet
07:56:18	29.4	335.89	M	Adult	Shadow	26.6	33	39	Open	N/A	Sunny	Toward the Sun	Fully Exposed	Foraging	Leaves	13/11/2021	Morning	Wet
07:56:53	138.22	335.89	M	Adult	Shadow	26.6	33	39	Open	N/A	Sunny	Toward the Sun	Fully Exposed	Foraging	Leaves	13/11/2021	Morning	Wet
07:57:39	91.83	335.89	M	Adult	Shadow	26.6	33	39	Open	N/A	Sunny	Partially Away From the Sun	Partially Exposed	Foraging	Leaves	13/11/2021	Morning	Wet
08:28:42	149.49	321.93	M	Juvenile	Kaleb	26.6	33	39	Open	N/A	Sunny	Directly Away From the Sun	Fully Exposed	Foraging	Leaves	13/11/2021	Morning	Wet
08:29:16	172.44	321.93	M	Juvenile	Kaleb	26.6	33	39	Open	N/A	Sunny	Partially Away From the Sun	Fully Exposed	Foraging	Leaves	13/11/2021	Morning	Wet
08:32:26	40.45	159.84	F	Adult	Madame Butterfly	26.6	33	39	Open	N/A	Sunny	Directly Away From the Sun	No Exposure	Foraging	Leaves	13/11/2021	Morning	Wet
08:32:58	74.94	159.84	F	Adult	Madame Butterfly	26.6	33	39	Open	N/A	Sunny	Toward the Sun	No Exposure	Foraging	Leaves	13/11/2021	Morning	Wet
08:33:29	44.45	159.84	F	Adult	Madame Butterfly	26.6	33	39	Open	N/A	Sunny	Partially Away From the Sun	No Exposure	Foraging	Leaves	13/11/2021	Morning	Wet
14:45:55	209.58	760	F	Adult	Kagiso	37.9	33.7	39	Open	N/A	Cloudy	Partially Away From the Sun	No Exposure	Foraging	Leaves	13/11/2021	Afternoon	Wet
14:54:08	550.12	760	F	Adult	Kagiso	37.9	33.7	39	Open	N/A	Cloudy	Toward the Sun	No Exposure	Foraging	Leaves	13/11/2021	Afternoon	Wet
14:54:38	40.93	417.14	F	Adult	Madame Butterfly	37.9	33.7	39	Open	N/A	Cloudy	Toward the Sun	No Exposure	Foraging	Leaves	13/11/2021	Afternoon	Wet
16:11:26	183.51	417.14	F	Adult	Madame Butterfly	37.9	33.7	39	Open	N/A	Cloudy	Partially Away From the Sun	No Exposure	Foraging	Leaves	13/11/2021	Evening	Wet
16:12:07	72.81	417.14	F	Adult	Madame Butterfly	37.9	33.7	39	Open	N/A	Cloudy	Toward the Sun	No Exposure	Foraging	Leaves	13/11/2021	Evening	Wet
16:12:40	119.89	417.14	F	Adult	Madame Butterfly	37.9	33.7	39	Open	N/A	Cloudy	Directly Away From the Sun	No Exposure	Foraging	Leaves	13/11/2021	Evening	Wet
07:56:31	63.69	606.22	F	Adult	Kagiso	28.8	33.4	40.4	Open	N/A	Sunny	Directly Away From the Sun	No Exposure	Foraging	Leaves	14/11/2021	Morning	Wet
07:57:15	196.74	606.22	F	Adult	Kagiso	28.8	33.4	40.4	Open	N/A	Sunny	Toward the Sun	No Exposure	Foraging	Leaves	14/11/2021	Morning	Wet
07:58:12	105.96	606.22	F	Adult	Kagiso	28.8	33.4	40.4	Open	N/A	Sunny	Partially Away From the Sun	Fully Exposed	Foraging	Leaves	14/11/2021	Morning	Wet
07:59:20	25.17	606.22	F	Adult	Kagiso	28.8	33.4	40.4	Open	N/A	Sunny	Partially Away From the Sun	Fully Exposed	Foraging	Leaves	14/11/2021	Morning	Wet
07:59:56	65.21	606.22	F	Adult	Kagiso	28.8	33.4	40.4	Open	N/A	Sunny	Partially Away From the Sun	Fully Exposed	Foraging	Leaves	14/11/2021	Morning	Wet
08:00:28	149.45	606.22	F	Adult	Kagiso	28.8	33.4	40.4	Open	N/A	Sunny	Partially Away From the Sun	Partially Exposed	Foraging	Leaves	14/11/2021	Morning	Wet
08:14:37	84.7	527.88	M	Adult	Aquarius	28.8	33.4	40.4	Open	N/A	Sunny	Toward the Sun	No Exposure	Foraging	Leaves	14/11/2021	Morning	Wet
08:16:07	78.98	527.88	M	Adult	Aquarius	28.8	33.4	40.4	Open	N/A	Sunny	Partially Away From the Sun	Partially Exposed	Foraging	Leaves	14/11/2021	Morning	Wet
08:16:47	35.72	527.88	M	Adult	Aquarius	28.8	33.4	40.4	Open	N/A	Sunny	Partially Away From the Sun	Fully Exposed	Foraging	Leaves	14/11/2021	Morning	Wet
08:17:51	211.22	527.88	M	Adult	Aquarius	28.8	33.4	40.4	Open	N/A	Sunny	Toward the Sun	Fully Exposed	Foraging	Leaves	14/11/2021	Morning	Wet
08:21:39	117.26	527.88	M	Adult	Aquarius	28.8	33.4	40.4	Open	N/A	Sunny	Partially Away From the Sun	No Exposure	Foraging	Leaves	14/11/2021	Morning	Wet
08:23:37	44.2	342.66	F	Adult	Madame Butterfly	28.8	33.4	40.4	Open	N/A	Sunny	Partially Away From the Sun	Fully Exposed	Foraging	Leaves	14/11/2021	Morning	Wet
08:27:04	85.7	342.66	F	Adult	Madame Butterfly	28.8	33.4	40.4	Open	N/A	Sunny	Partially Away From the Sun	Fully Exposed	Foraging	Leaves	14/11/2021	Morning	Wet
08:28:03	31.54	342.66	F	Adult	Madame Butterfly	28.8	33.4	40.4	Open	N/A	Sunny	Directly Away From the Sun	Fully Exposed	Foraging	Leaves	14/11/2021	Morning	Wet
08:31:58	54.68	342.66	F	Adult	Madame Butterfly	28.8	33.4	40.4	Open	N/A	Sunny	Toward the Sun	No Exposure	Foraging	Leaves	14/11/2021	Morning	Wet
08:32:30	90.89	342.66	F	Adult	Madame Butterfly	28.8	33.4	40.4	Open	N/A	Sunny	Partially Away From the Sun	Partially Exposed	Foraging	Leaves	14/11/2021	Morning	Wet
08:33:06	35.65	342.66	F	Adult	Madame Butterfly	28.8	33.4	40.4	Open	N/A	Sunny	Directly Away From the Sun	No Exposure	Foraging	Leaves	14/11/2021	Morning	Wet
14:16:04	62.7	869.34	M	Adult	Aquarius	38.8	40.1	40.4	Open	N/A	Sunny	Directly Away From the Sun	Fully Exposed	Foraging	Leaves	14/11/2021	Afternoon	Wet
14:16:37	94.13	869.34	M	Adult	Aquarius	38.8	40.1	40.4	Open	N/A	Sunny	Partially Away From the Sun	Fully Exposed	Foraging	Leaves	14/11/2021	Afternoon	Wet
14:18:07	75.26	869.34	M	Adult	Aquarius	38.8	40.1	40.4	Open	N/A	Sunny	Partially Away From the Sun	Fully Exposed	Foraging	Leaves	14/11/2021	Afternoon	Wet
14:19:49	28.39	869.34	M	Adult	Aquarius	38.8	40.1	40.4	Open	N/A	Sunny	Directly Away From the Sun	Partially Exposed	Foraging	Leaves	14/11/2021	Afternoon	Wet
14:20:40	16.96	869.34	M	Adult	Aquarius	38.8	40.1	40.4	Open	N/A	Sunny	Partially Away From the Sun	Partially Exposed	Foraging	Leaves	14/11/2021	Afternoon	Wet
14:21:26	25.92	869.34	M	Adult	Aquarius	38.8	40.1	40.4	Open	N/A	Sunny	Partially Away From the Sun	No Exposure	Foraging	Leaves	14/11/2021	Afternoon	Wet
14:22:04	39.91	869.34	M	Adult	Aquarius	38.8	40.1	40.4	Open	N/A	Sunny	Partially Away From the Sun	Partially Exposed	Foraging	Leaves	14/11/2021	Afternoon	Wet
14:24:04	431.27	869.34	M	Adult	Aquarius	38.8	40.1	40.4	Open	N/A	Sunny	Toward the Sun	Partially Exposed	Foraging	Leaves	14/11/2021	Afternoon	Wet
14:24:44	46.32	869.34	M	Adult	Aquarius	38.8	40.1	40.4	Open	N/A	Sunny	Partially Away From the Sun	Fully Exposed	Foraging	Leaves	14/11/2021	Afternoon	Wet
14:25:33	48.48	869.34	M	Adult	Aquarius	38.8	40.1	40.4	Open	N/A	Sunny	Partially Away From the Sun	No Exposure	Foraging	Leaves	14/11/2021	Afternoon	Wet
13:57:37	224.97	856.01	M	Adult	Sun	34.9	36.3	36.5	Open	N/A	Sunny	Directly Away From the Sun	No Exposure	Foraging	Leaves	15/11/2021	Afternoon	Wet
13:58:33	127.4	856.01	M	Adult	Sun	34.9	36.3	36.5	Open	N/A	Sunny	Toward the Sun	Partially Exposed	Foraging	Leaves	15/11/2021	Afternoon	Wet
13:59:19	161.76	856.01	M	Adult	Sun	34.9	36.3	36.5	Open	N/A	Sunny	Partially Away From the Sun	No Exposure	Foraging	Leaves	15/11/2021	Afternoon	Wet
14:01:09	341.88	856.01	M	Adult	Sun	34.9	36.3	36.5	Open	N/A	Sunny	Partially Away From the Sun	Partially Exposed	Foraging	Leaves	15/11/2021	Afternoon	Wet
14:32:29	117.89	302.27	M	Adult	Lethabo	34.9	36.3	36.5	Open	N/A	Sunny	Toward the Sun	Partially Exposed	Foraging	Leaves	15/11/2021	Afternoon	Wet
14:33:15	92.92	302.27	M	Adult	Lethabo	34.9	36.3	36.5	Open	N/A	Sunny	Partially Away From the Sun	Partially Exposed	Foraging	Leaves	15/11/2021	Afternoon	Wet
15:01:43	91.46	302.27	M	Adult	Lethabo	34.9	36.3	36.5	Open	N/A	Sunny	Partially Away From the Sun	Fully Exposed	Foraging	Leaves	15/11/2021	Afternoon	Wet
09:22:51	127.72	767.3	F	Adult	Flower	28.6	33.5	39.7	Open	N/A	Cloudy	Partially Away From the Sun	Fully Exposed	Foraging	Leaves	16/11/2021	Morning	Wet
09:23:42	268.2	767.3	F	Adult	Flower	28.6	33.5	39.7	Open	N/A	Cloudy	Toward the Sun	Fully Exposed	Foraging	Leaves	16/11/2021	Morning	Wet
09:27:40	187.81	767.3	F	Adult	Flower	28.6	33.5	39.7	Open	N/A	Cloudy	Partially Away From the Sun	Fully Exposed	Foraging	Leaves	16/11/2021	Morning	Wet
09:33:24	151.12	767.3	F	Adult	Flower	28.6	33.5	39.7	Open	N/A	Cloudy	Partially Away From the Sun	Fully Exposed	Foraging	Leaves	16/11/2021	Morning	Wet
09:34:14	32.45	767.3	F	Adult	Flower	28.6	33.5	39.7	Open	N/A	Cloudy	Directly Away From the Sun	Fully Exposed	Foraging	Leaves	16/11/2021	Morning	Wet
09:35:00	121.88	428	M	Adult	McFly	28.6	33.5	39.7	Open	N/A	Cloudy	Partially Away From the Sun	Partially Exposed	Foraging	Leaves	16/11/2021	Morning	Wet
09:41:54	306.31	428	M	Adult	McFly	28.6	33.5	39.7	Open	N/A	Cloudy	Partially Away From the Sun	Partially Exposed	Foraging	Leaves	16/11/2021	Morning	Wet
09:42:32	34.45	255	M	Sub-Adult	Meringue	28.6	33.5	39.7	Open	N/A	Cloudy	Directly Away From the Sun	Fully Exposed	Foraging	Leaves	16/11/2021	Morning	Wet
09:44:59	220.91	255	M	Sub-Adult	Meringue	28.6	33.5	39.7	Open	N/A	Cloudy	Directly Away From the Sun	Fully Exposed	Foraging	Leaves	16/11/2021	Morning	Wet
09:50:36	341.47	341	M	Adult	McFly	28.6	33.5	39.7	Open	N/A	Cloudy	Directly Away From the Sun	No Exposure	Foraging	Leaves	16/11/2021	Morning	Wet
09:51:39	147.99	148	M	Sub-Adult	Meringue	28.6	33.5	39.7	Open	N/A	Cloudy	Toward the Sun	Fully Exposed	Foraging	Leaves	16/11/2021	Morning	Wet
09:52:18	72	72	M	Adult	McFly	28.6	33.5	39.7	Open	N/A	Cloudy	Toward the Sun	Fully Exposed	Foraging	Leaves	16/11/2021	Morning	Wet
09:53:08	442.8	552.98	M	Sub-Adult	Meringue	28.6	33.5	39.7	Open	N/A	Cloudy	Directly Away From the Sun	Fully Exposed	Foraging	Leaves	16/11/2021	Morning	Wet
09:53:54	37.99	552.98	M	Sub-Adult	Meringue	28.6	33.5	39.7	Open	N/A	Cloudy	Directly Away From the Sun	Fully Exposed	Foraging	Leaves	16/11/2021	Morning	Wet
09:54:36	72.19	552.98	M	Sub-Adult	Meringue	28.6	33.5	39.7	Open	N/A	Cloudy	Toward the Sun	Partially Exposed	Foraging	Leaves	16/11/2021	Morning	Wet
13:44:28	278.54	773.05	F	Adult	Nala	38.4	39.3	39.7	Open	N/A	Sunny	Partially Away From the Sun	Fully Exposed	Foraging	Leaves	16/11/2021	Afternoon	Wet
13:45:03	79.45	773.05	F	Adult	Nala	38.4	39.3	39.7	Open	N/A	Sunny	Directly Away From the Sun	Fully Exposed	Foraging	Leaves	16/11/2021	Afternoon	Wet
13:45:34	29.65	773.05	F	Adult	Nala	38.4	39.3	39.7	Open	N/A	Sunny	Partially Away From the Sun	Partially Exposed	Foraging	Leaves	16/11/2021	Afternoon	Wet
13:46:01	88.53	773.05	F	Adult	Nala	38.4	39.3	39.7	Open	N/A	Sunny	Partially Away From the Sun	Partially Exposed	Foraging	Leaves	16/11/2021	Afternoon	Wet
13:52:04	272.09	773.05	F	Adult	Nala	38.4	39.3	39.7	Open	N/A	Sunny	Toward the Sun	Partially Exposed	Foraging	Leaves	16/11/2021	Afternoon	Wet
13:52:40	24.79	773.05	F	Adult	Nala	38.4	39.3	39.7	Open	N/A	Sunny	Partially Away From the Sun	Partially Exposed	Foraging	Leaves	16/11/2021	Afternoon	Wet
13:53:10	36.23	382.54	M	Adult	Kevin	38.4	39.3	39.7	Open	N/A	Sunny	Toward the Sun	Fully Exposed	Foraging	Leaves	16/11/2021	Afternoon	Wet
13:53:41	227.73	382.54	M	Adult	Kevin	38.4	39.3	39.7	Open	N/A	Sunny	Toward the Sun	No Exposure	Foraging	Leaves	16/11/2021	Afternoon	Wet
13:54:26	118.58	382.54	M	Adult	Kevin	38.4	39.3	39.7	Open	N/A	Sunny	Partially Away From the Sun	Partially Exposed	Foraging	Leaves	16/11/2021	Afternoon	Wet
14:51:55	736.29	1057.42	M	Sub-Adult	Forest	38.4	39.3	39.7	Open	N/A	Sunny	Toward the Sun	Fully Exposed	Foraging	Leaves	16/11/2021	Afternoon	Wet
14:52:27	321.13	1057.42	M	Sub-Adult	Forest	38.4	39.3	39.7	Open	N/A	Sunny	Partially Away From the Sun	Fully Exposed	Foraging	Leaves	16/11/2021	Afternoon	Wet
11:29:21	46.54	470.38	F	Sub-Adult	Walter	31.9	33.5	35.1	Open	N/A	Cloudy	Partially Away From the Sun	Fully Exposed	Foraging	Leaves	17/11/2021	Afternoon	Wet
11:30:10	52.12	470.38	F	Sub-Adult	Walter	31.9	33.5	35.1	Open	N/A	Cloudy	Toward the Sun	Fully Exposed	Foraging	Leaves	17/11/2021	Afternoon	Wet
11:30:45	49.17	470.38	F	Sub-Adult	Walter	31.9	33.5	35.1	Open	N/A	Cloudy	Directly Away From the Sun	Fully Exposed	Foraging	Leaves	17/11/2021	Afternoon	Wet
11:32:06	254.59	470.38	F	Sub-Adult	Walter	31.9	33.5	35.1	Open	N/A	Cloudy	Directly Away From the Sun	Fully Exposed	Foraging	Leaves	17/11/2021	Afternoon	Wet
11:33:11	67.96	470.38	F	Sub-Adult	Walter	31.9	33.5	35.1	Open	N/A	Cloudy	Partially Away From the Sun	Fully Exposed	Foraging	Leaves	17/11/2021	Afternoon	Wet
11:46:30	342.06	342	M	Juvenile	Felix	31.9	33.5	35.1	Open	N/A	Cloudy	Partially Away From the Sun	Fully Exposed	Foraging	Leaves	17/11/2021	Afternoon	Wet
11:47:54	368.25	933.72	M	Adult	Kevin	31.9	33.5	35.1	Open	N/A	Cloudy	Partially Away From the Sun	Partially Exposed	Foraging	Leaves	17/11/2021	Afternoon	Wet
11:48:26	29.95	933.72	M	Adult	Kevin	31.9	33.5	35.1	Open	N/A	Cloudy	Directly Away From the Sun	Fully Exposed	Foraging	Leaves	17/11/2021	Afternoon	Wet
11:52:06	357.02	933.72	M	Adult	Kevin	31.9	33.5	35.1	Open	N/A	Cloudy	Partially Away From the Sun	Fully Exposed	Foraging	Leaves	17/11/2021	Afternoon	Wet
11:55:01	101.9	933.72	M	Adult	Kevin	31.9	33.5	35.1	Open	N/A	Cloudy	Toward the Sun	Fully Exposed	Foraging	Leaves	17/11/2021	Afternoon	Wet
11:55:56	76.6	933.72	M	Adult	Kevin	31.9	33.5	35.1	Open	N/A	Cloudy	Partially Away From the Sun	Fully Exposed	Foraging	Leaves	17/11/2021	Afternoon	Wet

## Sheet: Elisa + Elodie
Time	Behaviour Dur (Sec)	Focal Dur (Sec)	Sex	Age	Name	Start Temp (C)	End Temp (C)	Max Temp (C)	Area	Wind	Weather	Position	Exposure	Behaviour	Food	Date	Session	Season
N/A	600	900	Female	Adult	Wolke	19.6	24.5	28	Closed	Moderate Wind	Cloudy	Away From the Sun	Cloudy Day	Foraging	Branch
N/A	140	900	Female	Adult	Wolke	19.6	24.5	28	Closed	Moderate Wind	Cloudy	Away From the Sun	Cloudy Day	Vigilant	N/A
N/A	160	900	Female	Adult	Wolke	19.6	24.5	28	Closed	Moderate Wind	Cloudy	Away From the Sun	Cloudy Day	Foraging	Branch
N/A	3	900	Female	Adult	Emily	19.6	24.5	28	Closed	Moderate Wind	Sunny	Toward the Sun	Fully Exposed	Foraging	Branch
N/A	70	900	Female	Adult	Emily	19.6	24.5	28	Closed	Moderate Wind	Cloudy	Away From the Sun	Cloudy Day	Moving	N/A
N/A	48	900	Female	Adult	Emily	19.6	24.5	28	Closed	Moderate Wind	Cloudy	Away From the Sun	Cloudy Day	Foraging	Branch
N/A	28	900	Female	Adult	Emily	19.6	24.5	28	Closed	Moderate Wind	Cloudy	Away From the Sun	Cloudy Day	Moving	N/A
N/A	91	900	Female	Adult	Emily	19.6	24.5	28	Closed	Moderate Wind	Cloudy	Away From the Sun	Cloudy Day	Foraging	Branch
N/A	5	900	Female	Adult	Emily	19.6	24.5	28	Closed	Moderate Wind	Cloudy	Away From the Sun	Cloudy Day	Moving	N/A
N/A	39	900	Female	Adult	Emily	19.6	24.5	28	Closed	Moderate Wind	Cloudy	Away From the Sun	Cloudy Day	Foraging	Branch
N/A	236	900	Female	Adult	Emily	19.6	24.5	28	Closed	Moderate Wind	Cloudy	Away From the Sun	Cloudy Day	Moving	N/A
N/A	75	900	Female	Adult	Emily	19.6	24.5	28	Closed	Moderate Wind	Cloudy	Away From the Sun	Cloudy Day	Foraging	Branch
N/A	26	900	Female	Adult	Emily	19.6	24.5	28	Closed	Moderate Wind	Cloudy	Away From the Sun	Cloudy Day	Moving	N/A
N/A	41	900	Female	Adult	Emily	19.6	24.5	28	Closed	Moderate Wind	Sunny	Toward the Sun	Fully Exposed	Foraging	Branch
N/A	69	900	Female	Adult	Emily	19.6	24.5	28	Closed	Moderate Wind	Cloudy	Away From the Sun	Cloudy Day	Vigilant	N/A
N/A	169	900	Female	Adult	Emily	19.6	24.5	28	Closed	Moderate Wind	Cloudy	Away From the Sun	Cloudy Day	Foraging	Branch
N/A	512	900	Female	Adult	Kagiso	19.6	24.5	28	Closed	Moderate Wind	Cloudy	Away From the Sun	Cloudy Day	Foraging	Leaves
N/A	183	900	Female	Adult	Kagiso	19.6	24.5	28	Closed	Moderate Wind	Cloudy	Away From the Sun	Cloudy Day	Moving	N/A
N/A	205	900	Female	Adult	Kagiso	19.6	24.5	28	Closed	Moderate Wind	Cloudy	Away From the Sun	Cloudy Day	Foraging	Branch
N/A	183	900	Female	Adult	Flower	26.4	28	28	Closed	Moderate Wind	Sunny	Toward the Sun	Fully Exposed	Foraging	Branch
N/A	124	900	Female	Adult	Flower	26.4	28	28	Closed	Moderate Wind	Sunny	Away From the Sun	Fully Exposed	Moving	N/A
N/A	225	900	Female	Adult	Flower	26.4	28	28	Closed	Moderate Wind	Sunny	Toward the Sun	Partially Exposed	Foraging	Branch
N/A	133	900	Female	Adult	Flower	26.4	28	28	Closed	Moderate Wind	Sunny	Toward the Sun	Fully Exposed	Foraging	Branch
N/A	10	900	Female	Adult	Flower	26.4	28	28	Closed	Moderate Wind	Sunny	Away From the Sun	Fully Exposed	Moving	N/A
N/A	74	900	Female	Adult	Flower	26.4	28	28	Closed	Moderate Wind	Sunny	Away From the Sun	No Exposure	Foraging	Branch
N/A	20	900	Female	Adult	Flower	26.4	28	28	Closed	Moderate Wind	Sunny	Away From the Sun	No Exposure	Inactive	N/A
N/A	131	900	Female	Adult	Flower	26.4	28	28	Closed	Moderate Wind	Sunny	Away From the Sun	No Exposure	Foraging	Branch
N/A	25	900	Male	Adult	Dark Male	29.6	29.1	29.8	Open	Moderate Wind	Sunny	Toward the Sun	Fully Exposed	Foraging	Branch
N/A	182	900	Male	Adult	Dark Male	29.6	29.1	29.8	Open	Moderate Wind	Sunny	Away From the Sun	Fully Exposed	Moving	N/A
N/A	27	900	Male	Adult	Dark Male	29.6	29.1	29.8	Open	Moderate Wind	Sunny	Away From the Sun	Fully Exposed	Inactive	N/A
N/A	26	900	Male	Adult	Dark Male	29.6	29.1	29.8	Open	Moderate Wind	Sunny	Away From the Sun	Fully Exposed	Moving	N/A
N/A	70	900	Male	Adult	Dark Male	29.6	29.1	29.8	Open	Moderate Wind	Sunny	Toward the Sun	Fully Exposed	Inactive	N/A
N/A	106	900	Male	Adult	Dark Male	29.6	29.1	29.8	Open	Moderate Wind	Sunny	Away From the Sun	Fully Exposed	Moving	N/A
N/A	54	900	Male	Adult	Dark Male	29.6	29.1	29.8	Open	Moderate Wind	Sunny	Away From the Sun	Fully Exposed	Vigilant	N/A
N/A	47	900	Male	Adult	Dark Male	29.6	29.1	29.8	Open	Moderate Wind	Sunny	Away From the Sun	Fully Exposed	Moving	N/A
N/A	36	900	Male	Adult	Dark Male	29.6	29.1	29.8	Open	Moderate Wind	Sunny	Away From the Sun	No Exposure	Inactive	N/A
N/A	12	900	Male	Adult	Dark Male	29.6	29.1	29.8	Open	Moderate Wind	Sunny	Away From the Sun	Partially Exposed	Moving	N/A
N/A	129	900	Male	Adult	Dark Male	29.6	29.1	29.8	Open	Moderate Wind	Sunny	Away From the Sun	Partially Exposed	Inactive	N/A
N/A	14	900	Male	Adult	Dark Male	29.6	29.1	29.8	Open	Moderate Wind	Sunny	Away From the Sun	Fully Exposed	Moving	N/A
N/A	172	900	Male	Adult	Dark Male	29.6	29.1	29.8	Open	Moderate Wind	Sunny	Toward the Sun	Partially Exposed	Inactive	N/A
N/A	236	900	Female	Adult	Noumea	23.4	25.4	26	Open	Moderate Wind	Cloudy	Away From the Sun	Cloudy Day	Vigilant	N/A
N/A	189	900	Female	Adult	Noumea	23.4	25.4	26	Open	Moderate Wind	Cloudy	Away From the Sun	Cloudy Day	Moving	N/A
N/A	35	900	Female	Adult	Noumea	23.4	25.4	26	Open	Moderate Wind	Cloudy	Away From the Sun	Cloudy Day	Vigilant	N/A
N/A	18	900	Female	Adult	Noumea	23.4	25.4	26	Open	Moderate Wind	Sunny	Toward the Sun	Fully Exposed	Foraging	Branch
N/A	49	900	Female	Adult	Noumea	23.4	25.4	26	Open	Moderate Wind	Cloudy	Away From the Sun	Cloudy Day	Vigilant	N/A
N/A	262	900	Female	Adult	Noumea	23.4	25.4	26	Open	Moderate Wind	Cloudy	Away From the Sun	Cloudy Day	Foraging	Branch
N/A	111	900	Female	Adult	Noumea	23.4	25.4	26	Open	Moderate Wind	Cloudy	Away From the Sun	Cloudy Day	Moving	N/A
N/A	259	900	Female	Adult	Emily	25.9	25.6	26	Open	Moderate Wind	Sunny	Toward the Sun	Fully Exposed	Foraging	Branch
N/A	29	900	Female	Adult	Emily	25.9	25.6	26	Open	Moderate Wind	Cloudy	Away From the Sun	Cloudy Day	Moving	N/A
N/A	612	900	Female	Adult	Emily	25.9	25.6	26	Open	Moderate Wind	Cloudy	Away From the Sun	Cloudy Day	Foraging	Leaves
N/A	364	900	Female	Adult	Wolke	25.9	25.6	26	Open	Moderate Wind	Overcast	Toward the Sun	Fully Exposed	Foraging	Leaves
N/A	93	900	Female	Adult	Wolke	25.9	25.6	26	Open	Moderate Wind	Overcast	Toward the Sun	Partially Exposed	Foraging	Leaves
N/A	443	900	Female	Adult	Wolke	25.9	25.6	26	Open	Moderate Wind	Overcast	Toward the Sun	Partially Exposed	Foraging	Leaves
N/A	203	900	Female	Adult	Madame Butterfly	25.9	25.6	26	Open	Moderate Wind	Overcast	Toward the Sun	Fully Exposed	Foraging	Leaves
N/A	21	900	Female	Adult	Madame Butterfly	25.9	25.6	26	Open	Moderate Wind	Overcast	Away From the Sun	Fully Exposed	Moving	N/A
N/A	318	900	Female	Adult	Madame Butterfly	25.9	25.6	26	Open	Moderate Wind	Cloudy	Away From the Sun	Cloudy Day	Foraging	Leaves
N/A	7	900	Female	Adult	Madame Butterfly	25.9	25.6	26	Open	Moderate Wind	Cloudy	Away From the Sun	Cloudy Day	Moving	N/A
N/A	248	900	Female	Adult	Madame Butterfly	25.9	25.6	26	Open	Moderate Wind	Cloudy	Away From the Sun	Cloudy Day	Foraging	Leaves
N/A	5	900	Female	Adult	Madame Butterfly	25.9	25.6	26	Open	Moderate Wind	Cloudy	Away From the Sun	Cloudy Day	Moving	N/A
N/A	98	900	Female	Adult	Madame Butterfly	25.9	25.6	26	Open	Moderate Wind	Cloudy	Away From the Sun	Cloudy Day	Foraging	Leaves
N/A	230	900	Female	Adult	Kagiso	21.3	22	26.4	Open	No Wind	Cloudy	Away From the Sun	Cloudy Day	Foraging	Leaves
N/A	46	900	Female	Adult	Kagiso	21.3	22	26.4	Open	No Wind	Cloudy	Away From the Sun	Cloudy Day	Moving	N/A
N/A	243	900	Female	Adult	Kagiso	21.3	22	26.4	Open	No Wind	Cloudy	Away From the Sun	Cloudy Day	Foraging	Branch
N/A	69	900	Female	Adult	Kagiso	21.3	22	26.4	Open	No Wind	Cloudy	Away From the Sun	Cloudy Day	Vigilant	N/A
[truncated: 428 more rows]

## Sheet: Gillaume
Time	Behaviour Dur (Sec)	Focal Dur (Sec)	Sex	Age	Name	Temp (C)	Area	Wind	Weather	Position	Exposure	Behaviour	Food	Date	Session	Season
[truncated: 108 more rows]

[truncated: 4 more sheets: Konstantin, Laurianne, Manon, Meline]
